# Supplementary material
Source: publisher figshare collection journal article supplement (https://acs.figshare.com/ndownloader/files/9449332)
Supplement: Supplementary file 1 [file 9449332]

data_2_2
_publ_contact_author_name        'Prof. Jan J. Weigand'
_publ_contact_author_address     
;Department of Chemistry and Food Chemistry
Chair Inorganic Molecular Chemistry
TU Dresden 
01062 Dresden, Germany
;
_publ_contact_author_email       jan.weigand@tu-dresden.de
_publ_contact_author_phone       +4935146342800
loop_
_publ_author_name
_publ_author_address
'Weigand, Jan J.'
;Department of Chemistry and Food Chemistry
Chair Inorganic Molecular Chemistry
TU Dresden 
01062 Dresden, Germany
;
'Hennersdorf, Felix'
;Department of Chemistry and Food Chemistry
Chair Inorganic Molecular Chemistry
TU Dresden 
01062 Dresden, Germany
;
'Froetschel, Julia'
;Department of Chemistry and Food Chemistry
Chair Inorganic Molecular Chemistry
TU Dresden 
01062 Dresden, Germany
;
_audit_creation_date              2017-04-20
_audit_creation_method
;
Olex2 1.2
(compiled 2015.09.30 svn.r3233 for OlexSys, GUI svn.r5103)
;
_publ_section_references
;
Dolomanov, O.V., Bourhis, L.J., Gildea, R.J, Howard, J.A.K. & Puschmann, H.
 (2009), J. Appl. Cryst. 42, 339-341.

Sheldrick, G.M. (2015). Acta Cryst. A71, 3-8.

Sheldrick, G.M. (2015). Acta Cryst. C71, 3-8.
;
_chemical_name_common             ?
_chemical_name_systematic         ?
_chemical_formula_moiety          'C58 H82 Ga2 N4 P4'
_chemical_formula_sum             'C58 H82 Ga2 N4 P4'
_chemical_formula_weight          1098.59
_chemical_melting_point           ?
_chemical_oxdiff_formula          'C512 H648 Cl57 Ga16 N32 P32 '
loop_
  _atom_type_symbol
  _atom_type_description
  _atom_type_scat_dispersion_real
  _atom_type_scat_dispersion_imag
  _atom_type_scat_source
 'C' 'C' 0.0181 0.0091 'International Tables Vol C Tables 4.2.6.8 and 6.1.1.4'
 'H' 'H' 0.0000 0.0000 'International Tables Vol C Tables 4.2.6.8 and 6.1.1.4'
 'Ga' 'Ga' -1.2846 0.7763
 'International Tables Vol C Tables 4.2.6.8 and 6.1.1.4'
 'N' 'N' 0.0311 0.0180 'International Tables Vol C Tables 4.2.6.8 and 6.1.1.4'
 'P' 'P' 0.2955 0.4335 'International Tables Vol C Tables 4.2.6.8 and 6.1.1.4'

_shelx_space_group_comment
;
The symmetry employed for this shelxl refinement is uniquely defined
by the following loop, which should always be used as a source of
symmetry information in preference to the above space-group names.
They are only intended as comments.
;
_space_group_crystal_system       'monoclinic'
_space_group_IT_number            15
_space_group_name_H-M_alt         'C 1 2/c 1'
_space_group_name_Hall            '-C 2yc'
loop_
  _space_group_symop_operation_xyz
 'x, y, z'
 '-x, y, -z+1/2'
 'x+1/2, y+1/2, z'
 '-x+1/2, y+1/2, -z+1/2'
 '-x, -y, -z'
 'x, -y, z-1/2'
 '-x+1/2, -y+1/2, -z'
 'x+1/2, -y+1/2, z-1/2'

_cell_length_a                    18.34458(19)
_cell_length_b                    18.10118(18)
_cell_length_c                    43.7739(4)
_cell_angle_alpha                 90
_cell_angle_beta                  92.7471(8)
_cell_angle_gamma                 90
_cell_volume                      14518.8(2)
_cell_formula_units_Z             8
_cell_measurement_reflns_used     45624
_cell_measurement_temperature     100.01(10)
_cell_measurement_theta_max       76.4640
_cell_measurement_theta_min       3.4120
_shelx_estimated_absorpt_T_max    ?
_shelx_estimated_absorpt_T_min    ?
_exptl_absorpt_coefficient_mu     1.976
_exptl_absorpt_correction_T_max   0.547
_exptl_absorpt_correction_T_min   0.261
_exptl_absorpt_correction_type    gaussian
_exptl_absorpt_process_details
;
CrysAlisPro 1.171.38.43 (Rigaku Oxford Diffraction, 2015)
Numerical absorption correction based on gaussian integration over
			a multifaceted crystal model
Empirical absorption correction using spherical harmonics,
 implemented in SCALE3 ABSPACK scaling algorithm.
;
_exptl_absorpt_special_details    ?
_exptl_crystal_colour             orange
_exptl_crystal_colour_primary     orange
_exptl_crystal_density_diffrn     1.005
_exptl_crystal_density_meas       ?
_exptl_crystal_density_method     ?
_exptl_crystal_description        block
_exptl_crystal_F_000              4640
loop_
  _exptl_crystal_face_index_h
  _exptl_crystal_face_index_k
  _exptl_crystal_face_index_l
  _exptl_crystal_face_perp_dist
 0 0 -1 0.0672
 0 0 1 0.1164
 -1 2 5 0.1402
 3 -5 -3 0.1873
 5 4 -3 0.1463
 -4 -5 5 0.1432
 -5 -2 0 0.1620
 -2 -1 5 0.1272
 5 -1 -3 0.1600
 -1 5 -3 0.1829
 0 -1 5 0.1642
 7 3 21 0.1526
 5 -6 21 0.1842
 6 7 17 0.1522
 -6 -7 -17 0.1437
 -7 -3 -21 0.1296
 -2 3 27 0.1184

_exptl_crystal_size_max           0.462
_exptl_crystal_size_mid           0.321
_exptl_crystal_size_min           0.184
loop_
  _exptl_oxdiff_crystal_face_indexfrac_h
  _exptl_oxdiff_crystal_face_indexfrac_k
  _exptl_oxdiff_crystal_face_indexfrac_l
  _exptl_oxdiff_crystal_face_x
  _exptl_oxdiff_crystal_face_y
  _exptl_oxdiff_crystal_face_z
 0.0000 -0.0000 -1.0000 -0.0229 0.0162 -0.0213
 -0.0000 0.0000 1.0000 0.0229 -0.0162 0.0213
 -1.0000 2.0001 4.9992 0.2159 -0.1301 -0.0466
 2.9999 -4.9998 -2.9979 -0.3507 0.1438 0.3317
 5.0002 4.0005 -3.0000 -0.2685 -0.4389 -0.1864
 -4.0002 -5.0003 5.0005 0.2351 0.4033 0.3185
 -5.0001 -2.0006 -0.0005 0.2435 0.3827 -0.0042
 -2.0001 -1.0000 4.9998 0.2077 0.0826 0.1173
 5.0000 -0.9996 -2.9986 -0.3780 -0.1770 0.1305
 -0.9999 4.9998 -3.0016 0.0982 -0.1578 -0.4069
 -0.0001 -0.9998 5.0002 0.0928 -0.0286 0.1697
 7.0000 3.0018 21.0005 0.1450 -0.8863 0.4396
 4.9997 -5.9985 21.0026 0.0629 -0.3036 0.9577
 6.0001 7.0015 16.9991 0.1984 -0.9755 0.0749
 -6.0001 -7.0015 -16.9991 -0.1984 0.9755 -0.0749
 -7.0000 -3.0018 -21.0005 -0.1450 0.8863 -0.4396
 -2.0001 3.0010 26.9984 0.7998 -0.4832 0.3315

_exptl_transmission_factor_max    ?
_exptl_transmission_factor_min    ?
_diffrn_reflns_av_R_equivalents   0.0588
_diffrn_reflns_av_unetI/netI      0.0291
_diffrn_reflns_Laue_measured_fraction_full 1.000
_diffrn_reflns_Laue_measured_fraction_max 0.986
_diffrn_reflns_limit_h_max        22
_diffrn_reflns_limit_h_min        -22
_diffrn_reflns_limit_k_max        21
_diffrn_reflns_limit_k_min        -22
_diffrn_reflns_limit_l_max        55
_diffrn_reflns_limit_l_min        -50
_diffrn_reflns_number             77051
_diffrn_reflns_point_group_measured_fraction_full 1.000
_diffrn_reflns_point_group_measured_fraction_max 0.986
_diffrn_reflns_theta_full         67.684
_diffrn_reflns_theta_max          76.807
_diffrn_reflns_theta_min          3.432
_diffrn_ambient_environment       N~2~
_diffrn_ambient_temperature       100.01(10)
_diffrn_detector                  'CCD plate'
_diffrn_detector_area_resol_mean  5.2850
_diffrn_detector_type             AtlasS2
_diffrn_measured_fraction_theta_full 1.000
_diffrn_measured_fraction_theta_max 0.986
_diffrn_measurement_details
;
List of Runs (angles in degrees, time in seconds):

  # Type    Start    End  Width  t~exp~   \w     \q     \k     \f   Frames
--------------------------------------------------------------------------
  1  \w    -61.00  34.00   0.50    1.50    --  -38.50  38.00 -90.00  190
  2  \w     23.00  98.00   0.50    1.50    --   42.50-125.00-180.00  150
  3  \w     23.00  98.00   0.50    1.50    --   42.50-125.00  60.00  150
  4  \w     23.00  98.00   0.50    1.50    --   42.50-125.00 -60.00  150
  5  \w     16.00 113.00   0.50    1.50    --   42.50  57.00-180.00  194
  6  \w     23.00  98.00   0.50    1.50    --   42.50-125.00   0.00  150
  7  \w     87.00 178.00   0.50    6.00    --  111.00  30.00 150.00  182
  8  \w     37.00 142.00   0.50    6.00    --  111.00 -77.00 -90.00  210
  9  \w     30.00 109.00   0.50    6.00    --  111.00 -94.00  60.00  158
 10  \w     31.00 156.00   0.50    6.00    --  111.00 -15.00-120.00  250
 11  \w     40.00 135.00   0.50    6.00    --  111.00 -45.00-120.00  190
 12  \w     30.00 109.00   0.50    6.00    --  111.00 -94.00-150.00  158
 13  \w     30.00 109.00   0.50    6.00    --  111.00 -94.00  90.00  158
 14  \w     87.00 178.00   0.50    6.00    --  111.00  30.00 120.00  182
 15  \w     80.00 178.00   0.50    6.00    --  111.00  77.00  30.00  196
 16  \w     11.00 116.00   0.50    1.50    --   42.50  77.00 -60.00  210
 17  \w     16.00 113.00   0.50    1.50    --   42.50  57.00 -90.00  194
 18  \w     16.00 113.00   0.50    1.50    --   42.50  57.00   0.00  194
 19  \w     11.00 116.00   0.50    1.50    --   42.50  77.00  60.00  210
 20  \w     66.00 140.00   0.50    6.00    --  111.00  15.00 -30.00  148
;
_diffrn_measurement_device        'four-circle diffractometer'
_diffrn_measurement_device_type   'SuperNova, Dual, Cu at zero, AtlasS2'
_diffrn_measurement_method        '\w scans'
_diffrn_orient_matrix_type
'CrysAlisPro convention (1999,Acta A55,543-557)'
_diffrn_orient_matrix_UB_11       -0.0574751000
_diffrn_orient_matrix_UB_12       0.0219060000
_diffrn_orient_matrix_UB_13       0.0229327000
_diffrn_orient_matrix_UB_21       -0.0555750000
_diffrn_orient_matrix_UB_22       -0.0523901000
_diffrn_orient_matrix_UB_23       -0.0161903000
_diffrn_orient_matrix_UB_31       0.0261885000
_diffrn_orient_matrix_UB_32       -0.0633734000
_diffrn_orient_matrix_UB_33       0.0212630000
_diffrn_radiation_monochromator   mirror
_diffrn_radiation_probe           x-ray
_diffrn_radiation_type            CuK\a
_diffrn_radiation_wavelength      1.54184
_diffrn_source                    'micro-focus sealed X-ray tube'
_diffrn_source_type               'SuperNova (Cu) X-ray Source'
_reflns_Friedel_coverage          0.000
_reflns_Friedel_fraction_full     .
_reflns_Friedel_fraction_max      .
_reflns_number_gt                 14348
_reflns_number_total              15110
_reflns_odcompleteness_completeness 99.99
_reflns_odcompleteness_iscentric  1
_reflns_odcompleteness_theta      66.97
_reflns_special_details
;
 Reflections were merged by SHELXL according to the crystal
 class for the calculation of statistics and refinement.
 
 Structure factors included contributions from the .fab file.
 
 _reflns_Friedel_fraction is defined as the number of unique
 Friedel pairs measured divided by the number that would be
 possible theoretically, ignoring centric projections and
 systematic absences.
;
_reflns_threshold_expression      'I > 2\s(I)'
_computing_cell_refinement        'CrysAlisPro 1.171.38.43 (Rigaku OD, 2015)'
_computing_data_collection        'CrysAlisPro 1.171.38.43 (Rigaku OD, 2015)'
_computing_data_reduction         'CrysAlisPro 1.171.38.43 (Rigaku OD, 2015)'
_computing_molecular_graphics     'Olex2 (Dolomanov et al., 2009)'
_computing_publication_material   'Olex2 (Dolomanov et al., 2009)'
_computing_structure_refinement   'ShelXL (Sheldrick, 2015)'
_computing_structure_solution     'ShelXT (Sheldrick, 2015)'
_refine_diff_density_max          0.787
_refine_diff_density_min          -0.431
_refine_diff_density_rms          0.065
_refine_ls_extinction_coef        .
_refine_ls_extinction_method      none
_refine_ls_goodness_of_fit_ref    1.076
_refine_ls_hydrogen_treatment     constr
_refine_ls_matrix_type            full
_refine_ls_number_parameters      755
_refine_ls_number_reflns          15110
_refine_ls_number_restraints      396
_refine_ls_R_factor_all           0.0487
_refine_ls_R_factor_gt            0.0463
_refine_ls_restrained_S_all       1.081
_refine_ls_shift/su_max           0.002
_refine_ls_shift/su_mean          0.000
_refine_ls_structure_factor_coef  Fsqd
_refine_ls_weighting_details
'w=1/[\s^2^(Fo^2^)+(0.0471P)^2^+33.7644P] where P=(Fo^2^+2Fc^2^)/3'
_refine_ls_weighting_scheme       calc
_refine_ls_wR_factor_gt           0.1153
_refine_ls_wR_factor_ref          0.1171
_refine_special_details           ?
_olex2_refinement_description
;
1. Fixed Uiso
 At 1.2 times of:
  All C(H) groups
 At 1.5 times of:
  All C(H,H,H) groups
2. Uiso/Uaniso restraints and constraints
N2A \\sim C18A \\sim C19A \\sim C20A \\sim C21A \\sim C22A \\sim C23A \\sim
C24A \\sim C25A \\sim C26A \\sim C27A \\sim C28A \\sim C29A \\sim N2B \\sim
C18B \\sim C19B \\sim C20B \\sim C21B \\sim C22B \\sim C23B \\sim C24B \\sim
C25B \\sim C26B \\sim C27B \\sim C28B \\sim C29B: within 2A with sigma of 0.01
and sigma for terminal atoms of 0.02
3. Others
 Sof(N2B)=Sof(C18B)=Sof(C19B)=Sof(C20B)=Sof(H20B)=Sof(C21B)=Sof(H21B)=
 Sof(C22B)=Sof(H22B)=Sof(C23B)=Sof(C24B)=Sof(H24B)=Sof(C25B)=Sof(H25D)=
 Sof(H25E)=Sof(H25F)=Sof(C26B)=Sof(H26D)=Sof(H26E)=Sof(H26F)=Sof(C27B)=
 Sof(H27B)=Sof(C28B)=Sof(H28D)=Sof(H28E)=Sof(H28F)=Sof(C29B)=Sof(H29D)=
 Sof(H29E)=Sof(H29F)=1-FVAR(1)
 Sof(N2A)=Sof(C18A)=Sof(C19A)=Sof(C20A)=Sof(H20A)=Sof(C21A)=Sof(H21A)=
 Sof(C22A)=Sof(H22A)=Sof(C23A)=Sof(C24A)=Sof(H24A)=Sof(C25A)=Sof(H25A)=
 Sof(H25B)=Sof(H25C)=Sof(C26A)=Sof(H26A)=Sof(H26B)=Sof(H26C)=Sof(C27A)=
 Sof(H27A)=Sof(C28A)=Sof(H28A)=Sof(H28B)=Sof(H28C)=Sof(C29A)=Sof(H29A)=
 Sof(H29B)=Sof(H29C)=FVAR(1)
4.a Ternary CH refined with riding coordinates:
 C12(H12), C15(H15), C24A(H24A), C27A(H27A), C41(H41), C44(H44), C53(H53),
 C56(H56), C24B(H24B), C27B(H27B)
4.b Aromatic/amide H refined with riding coordinates:
 C2(H2), C8(H8), C9(H9), C10(H10), C20A(H20A), C21A(H21A), C22A(H22A),
 C31(H31), C37(H37), C38(H38), C39(H39), C49(H49), C50(H50), C51(H51),
 C20B(H20B), C21B(H21B), C22B(H22B)
4.c Idealised Me refined as rotating group:
 C4(H4A,H4B,H4C), C5(H5A,H5B,H5C), C13(H13A,H13B,H13C), C14(H14A,H14B,H14C),
 C16(H16A,H16B,H16C), C17(H17A,H17B,H17C), C25A(H25A,H25B,H25C), C26A(H26A,H26B,
 H26C), C28A(H28A,H28B,H28C), C29A(H29A,H29B,H29C), C33(H33A,H33B,H33C),
 C34(H34A,H34B,H34C), C42(H42A,H42B,H42C), C43(H43A,H43B,H43C), C45(H45A,H45B,
 H45C), C46(H46A,H46B,H46C), C54(H54A,H54B,H54C), C55(H55A,H55B,H55C), C57(H57A,
 H57B,H57C), C58(H58A,H58B,H58C), C25B(H25D,H25E,H25F), C26B(H26D,H26E,H26F),
 C28B(H28D,H28E,H28F), C29B(H29D,H29E,H29F)
;
_atom_sites_solution_hydrogens    geom
_atom_sites_solution_primary      ?
_atom_sites_solution_secondary    ?
loop_
  _atom_site_label
  _atom_site_type_symbol
  _atom_site_fract_x
  _atom_site_fract_y
  _atom_site_fract_z
  _atom_site_U_iso_or_equiv
  _atom_site_adp_type
  _atom_site_occupancy
  _atom_site_site_symmetry_order
  _atom_site_calc_flag
  _atom_site_refinement_flags_posn
  _atom_site_refinement_flags_adp
  _atom_site_refinement_flags_occupancy
  _atom_site_disorder_assembly
  _atom_site_disorder_group
 Ga1 Ga 0.72025(2) 0.55940(2) 0.32489(2) 0.02641(7) Uani 1 1 d . . . . .
 Ga2 Ga 0.74762(2) 0.53689(2) 0.42571(2) 0.02043(7) Uani 1 1 d . . . . .
 P1 P 0.73684(3) 0.46631(3) 0.38038(2) 0.02371(11) Uani 1 1 d . . . . .
 P2 P 0.64810(3) 0.55053(3) 0.36875(2) 0.02808(12) Uani 1 1 d . . . . .
 P3 P 0.81178(3) 0.55700(3) 0.36504(2) 0.02570(12) Uani 1 1 d . . . . .
 P4 P 0.73191(3) 0.63233(3) 0.38786(2) 0.02877(12) Uani 1 1 d . . . . .
 N1 N 0.71426(12) 0.47939(12) 0.29463(4) 0.0321(4) Uani 1 1 d . . . . .
 N2A N 0.7184(7) 0.6441(6) 0.2948(3) 0.0346(16) Uani 0.693(5) 1 d . U P A 1
 N3 N 0.68117(10) 0.51693(10) 0.45844(4) 0.0231(3) Uani 1 1 d . . . . .
 N4 N 0.83776(10) 0.53328(11) 0.45196(4) 0.0261(4) Uani 1 1 d . . . . .
 C1 C 0.69953(15) 0.49106(17) 0.26489(6) 0.0399(6) Uani 1 1 d . . . . .
 C2 C 0.68919(17) 0.56184(18) 0.25203(6) 0.0458(7) Uani 1 1 d . . . . .
 H2 H 0.6717 0.5626 0.2312 0.055 Uiso 1 1 calc R . . . .
 C3 C 0.70083(17) 0.63035(18) 0.26535(6) 0.0457(7) Uani 1 1 d . . . . .
 C4 C 0.69518(19) 0.4270(2) 0.24295(6) 0.0533(8) Uani 1 1 d . . . . .
 H4A H 0.7365 0.4290 0.2296 0.080 Uiso 1 1 calc GR . . . .
 H4B H 0.6494 0.4297 0.2305 0.080 Uiso 1 1 calc GR . . . .
 H4C H 0.6968 0.3805 0.2545 0.080 Uiso 1 1 calc GR . . . .
 C5 C 0.6967(2) 0.6966(2) 0.24405(7) 0.0646(10) Uani 1 1 d . . . . .
 H5A H 0.6498 0.6964 0.2324 0.097 Uiso 1 1 calc GR . . . .
 H5B H 0.7365 0.6940 0.2299 0.097 Uiso 1 1 calc GR . . . .
 H5C H 0.7013 0.7422 0.2561 0.097 Uiso 1 1 calc GR . . . .
 C6 C 0.72874(16) 0.40595(14) 0.30625(5) 0.0366(6) Uani 1 1 d . . . . .
 C7 C 0.67018(17) 0.36374(15) 0.31669(6) 0.0429(6) Uani 1 1 d . . . . .
 C8 C 0.6860(2) 0.29398(17) 0.32870(7) 0.0509(7) Uani 1 1 d . . . . .
 H8 H 0.6476 0.2639 0.3355 0.061 Uiso 1 1 calc R . . . .
 C9 C 0.7561(2) 0.26817(17) 0.33083(7) 0.0560(8) Uani 1 1 d . . . . .
 H9 H 0.7656 0.2202 0.3389 0.067 Uiso 1 1 calc R . . . .
 C10 C 0.8133(2) 0.31104(18) 0.32139(8) 0.0554(8) Uani 1 1 d . . . . .
 H10 H 0.8618 0.2926 0.3235 0.067 Uiso 1 1 calc R . . . .
 C11 C 0.80060(18) 0.38114(16) 0.30875(7) 0.0451(6) Uani 1 1 d . . . . .
 C12 C 0.59145(16) 0.39212(18) 0.31618(7) 0.0472(7) Uani 1 1 d . . . . .
 H12 H 0.5930 0.4469 0.3133 0.057 Uiso 1 1 calc R . . . .
 C13 C 0.55446(19) 0.3773(2) 0.34579(7) 0.0578(8) Uani 1 1 d . . . . .
 H13A H 0.5058 0.3998 0.3448 0.087 Uiso 1 1 calc GR . . . .
 H13B H 0.5837 0.3986 0.3629 0.087 Uiso 1 1 calc GR . . . .
 H13C H 0.5500 0.3238 0.3488 0.087 Uiso 1 1 calc GR . . . .
 C14 C 0.5455(2) 0.3598(3) 0.28945(8) 0.0701(11) Uani 1 1 d . . . . .
 H14A H 0.5635 0.3783 0.2702 0.105 Uiso 1 1 calc GR . . . .
 H14B H 0.4944 0.3745 0.2911 0.105 Uiso 1 1 calc GR . . . .
 H14C H 0.5491 0.3058 0.2899 0.105 Uiso 1 1 calc GR . . . .
 C15 C 0.86417(19) 0.42620(19) 0.29834(9) 0.0576(8) Uani 1 1 d . . . . .
 H15 H 0.8462 0.4773 0.2936 0.069 Uiso 1 1 calc R . . . .
 C16 C 0.9263(2) 0.4319(2) 0.32291(11) 0.0697(11) Uani 1 1 d . . . . .
 H16A H 0.9068 0.4488 0.3422 0.105 Uiso 1 1 calc GR . . . .
 H16B H 0.9629 0.4673 0.3163 0.105 Uiso 1 1 calc GR . . . .
 H16C H 0.9491 0.3833 0.3260 0.105 Uiso 1 1 calc GR . . . .
 C17 C 0.8926(2) 0.3930(3) 0.26872(10) 0.0739(11) Uani 1 1 d . . . . .
 H17A H 0.9103 0.3426 0.2727 0.111 Uiso 1 1 calc GR . . . .
 H17B H 0.9327 0.4234 0.2617 0.111 Uiso 1 1 calc GR . . . .
 H17C H 0.8530 0.3918 0.2529 0.111 Uiso 1 1 calc GR . . . .
 C18A C 0.7493(4) 0.7126(4) 0.30738(16) 0.0441(13) Uani 0.693(5) 1 d . U P A 1
 C19A C 0.7030(4) 0.7625(3) 0.32118(11) 0.0497(11) Uani 0.693(5) 1 d . U P A 1
 C20A C 0.7336(5) 0.8273(3) 0.33319(15) 0.0607(15) Uani 0.693(5) 1 d . U P A 1
 H20A H 0.7033 0.8628 0.3423 0.073 Uiso 0.693(5) 1 calc R . P A 1
 C21A C 0.8082(4) 0.8406(3) 0.33205(13) 0.0680(14) Uani 0.693(5) 1 d . U P A 1
 H21A H 0.8284 0.8852 0.3401 0.082 Uiso 0.693(5) 1 calc R . P A 1
 C22A C 0.8528(4) 0.7890(3) 0.31916(14) 0.0669(14) Uani 0.693(5) 1 d . U P A 1
 H22A H 0.9039 0.7976 0.3190 0.080 Uiso 0.693(5) 1 calc R . P A 1
 C23A C 0.8237(4) 0.7246(4) 0.30636(17) 0.0567(14) Uani 0.693(5) 1 d . U P A 1
 C24A C 0.6211(4) 0.7482(4) 0.32379(14) 0.0603(14) Uani 0.693(5) 1 d . U P A 1
 H24A H 0.6145 0.6934 0.3228 0.072 Uiso 0.693(5) 1 calc R . P A 1
 C25A C 0.5921(4) 0.7727(4) 0.35373(13) 0.0662(15) Uani 0.693(5) 1 d . U P A 1
 H25A H 0.5943 0.8267 0.3551 0.099 Uiso 0.693(5) 1 calc GR . P A 1
 H25B H 0.6217 0.7510 0.3706 0.099 Uiso 0.693(5) 1 calc GR . P A 1
 H25C H 0.5413 0.7565 0.3549 0.099 Uiso 0.693(5) 1 calc GR . P A 1
 C26A C 0.5732(5) 0.7802(6) 0.29747(15) 0.098(2) Uani 0.693(5) 1 d . U P A 1
 H26A H 0.5836 0.8331 0.2954 0.147 Uiso 0.693(5) 1 calc GR . P A 1
 H26B H 0.5217 0.7735 0.3017 0.147 Uiso 0.693(5) 1 calc GR . P A 1
 H26C H 0.5837 0.7547 0.2784 0.147 Uiso 0.693(5) 1 calc GR . P A 1
 C27A C 0.8724(5) 0.6715(4) 0.2906(2) 0.0685(18) Uani 0.693(5) 1 d . U P A 1
 H27A H 0.8440 0.6253 0.2862 0.082 Uiso 0.693(5) 1 calc R . P A 1
 C28A C 0.9412(6) 0.6504(4) 0.3118(3) 0.089(3) Uani 0.693(5) 1 d . U P A 1
 H28A H 0.9721 0.6941 0.3152 0.133 Uiso 0.693(5) 1 calc GR . P A 1
 H28B H 0.9692 0.6117 0.3019 0.133 Uiso 0.693(5) 1 calc GR . P A 1
 H28C H 0.9252 0.6321 0.3314 0.133 Uiso 0.693(5) 1 calc GR . P A 1
 C29A C 0.8963(8) 0.7012(7) 0.2610(3) 0.086(3) Uani 0.693(5) 1 d . U P A 1
 H29A H 0.8535 0.7099 0.2472 0.129 Uiso 0.693(5) 1 calc GR . P A 1
 H29B H 0.9288 0.6656 0.2517 0.129 Uiso 0.693(5) 1 calc GR . P A 1
 H29C H 0.9224 0.7479 0.2646 0.129 Uiso 0.693(5) 1 calc GR . P A 1
 C30 C 0.70121(13) 0.52465(12) 0.48789(5) 0.0271(4) Uani 1 1 d . . . . .
 C31 C 0.77282(13) 0.53902(14) 0.49849(5) 0.0316(5) Uani 1 1 d . . . . .
 H31 H 0.7790 0.5514 0.5195 0.038 Uiso 1 1 calc R . . . .
 C32 C 0.83685(13) 0.53769(14) 0.48229(5) 0.0319(5) Uani 1 1 d . . . . .
 C33 C 0.64497(14) 0.51700(15) 0.51183(5) 0.0337(5) Uani 1 1 d . . . . .
 H33A H 0.6248 0.5657 0.5163 0.051 Uiso 1 1 calc GR . . . .
 H33B H 0.6680 0.4960 0.5305 0.051 Uiso 1 1 calc GR . . . .
 H33C H 0.6056 0.4843 0.5042 0.051 Uiso 1 1 calc GR . . . .
 C34 C 0.90744(15) 0.54131(19) 0.50138(6) 0.0460(7) Uani 1 1 d . . . . .
 H34A H 0.9486 0.5424 0.4879 0.069 Uiso 1 1 calc GR . . . .
 H34B H 0.9116 0.4978 0.5147 0.069 Uiso 1 1 calc GR . . . .
 H34C H 0.9080 0.5861 0.5140 0.069 Uiso 1 1 calc GR . . . .
 C35 C 0.60948(12) 0.49076(13) 0.44870(5) 0.0251(4) Uani 1 1 d . . . . .
 C36 C 0.60177(13) 0.41569(13) 0.44050(5) 0.0294(5) Uani 1 1 d . . . . .
 C37 C 0.53393(14) 0.39189(15) 0.42899(6) 0.0379(6) Uani 1 1 d . . . . .
 H37 H 0.5276 0.3415 0.4233 0.045 Uiso 1 1 calc R . . . .
 C38 C 0.47536(14) 0.43980(17) 0.42556(7) 0.0425(6) Uani 1 1 d . . . . .
 H38 H 0.4296 0.4225 0.4174 0.051 Uiso 1 1 calc R . . . .
 C39 C 0.48360(13) 0.51273(17) 0.43400(6) 0.0378(6) Uani 1 1 d . . . . .
 H39 H 0.4429 0.5451 0.4319 0.045 Uiso 1 1 calc R . . . .
 C40 C 0.55063(12) 0.54023(14) 0.44553(5) 0.0287(5) Uani 1 1 d . . . . .
 C41 C 0.66439(14) 0.36110(13) 0.44522(6) 0.0327(5) Uani 1 1 d . . . . .
 H41 H 0.7109 0.3895 0.4439 0.039 Uiso 1 1 calc R . . . .
 C42 C 0.66472(17) 0.30037(15) 0.42092(7) 0.0429(6) Uani 1 1 d . . . . .
 H42A H 0.6211 0.2696 0.4224 0.064 Uiso 1 1 calc GR . . . .
 H42B H 0.7084 0.2697 0.4243 0.064 Uiso 1 1 calc GR . . . .
 H42C H 0.6648 0.3229 0.4006 0.064 Uiso 1 1 calc GR . . . .
 C43 C 0.66436(17) 0.32705(16) 0.47722(6) 0.0438(6) Uani 1 1 d . . . . .
 H43A H 0.6672 0.3664 0.4926 0.066 Uiso 1 1 calc GR . . . .
 H43B H 0.7066 0.2942 0.4803 0.066 Uiso 1 1 calc GR . . . .
 H43C H 0.6194 0.2987 0.4793 0.066 Uiso 1 1 calc GR . . . .
 C44 C 0.55721(13) 0.62120(14) 0.45422(6) 0.0341(5) Uani 1 1 d . . . . .
 H44 H 0.6078 0.6301 0.4630 0.041 Uiso 1 1 calc R . . . .
 C45 C 0.54484(19) 0.67075(18) 0.42622(7) 0.0531(8) Uani 1 1 d . . . . .
 H45A H 0.5784 0.6564 0.4105 0.080 Uiso 1 1 calc GR . . . .
 H45B H 0.5538 0.7223 0.4321 0.080 Uiso 1 1 calc GR . . . .
 H45C H 0.4944 0.6653 0.4181 0.080 Uiso 1 1 calc GR . . . .
 C46 C 0.50318(15) 0.64228(16) 0.47850(6) 0.0412(6) Uani 1 1 d . . . . .
 H46A H 0.4531 0.6361 0.4700 0.062 Uiso 1 1 calc GR . . . .
 H46B H 0.5110 0.6939 0.4846 0.062 Uiso 1 1 calc GR . . . .
 H46C H 0.5109 0.6103 0.4964 0.062 Uiso 1 1 calc GR . . . .
 C47 C 0.90537(12) 0.52305(14) 0.43674(5) 0.0304(5) Uani 1 1 d . . . . .
 C48 C 0.92633(14) 0.45075(15) 0.42940(6) 0.0367(5) Uani 1 1 d . . . . .
 C49 C 0.99108(16) 0.44147(19) 0.41453(8) 0.0527(8) Uani 1 1 d . . . . .
 H49 H 1.0069 0.3930 0.4097 0.063 Uiso 1 1 calc R . . . .
 C50 C 1.03260(18) 0.5012(2) 0.40671(10) 0.0655(10) Uani 1 1 d . . . . .
 H50 H 1.0771 0.4938 0.3969 0.079 Uiso 1 1 calc R . . . .
 C51 C 1.00983(16) 0.5715(2) 0.41312(8) 0.0559(8) Uani 1 1 d . . . . .
 H51 H 1.0385 0.6123 0.4072 0.067 Uiso 1 1 calc R . . . .
 C52 C 0.94563(14) 0.58449(17) 0.42805(7) 0.0412(6) Uani 1 1 d . . . . .
 C53 C 0.88296(15) 0.38381(16) 0.43761(7) 0.0429(6) Uani 1 1 d . . . . .
 H53 H 0.8326 0.4007 0.4419 0.052 Uiso 1 1 calc R . . . .
 C54 C 0.87639(18) 0.32727(17) 0.41157(8) 0.0536(8) Uani 1 1 d . . . . .
 H54A H 0.8562 0.3514 0.3930 0.080 Uiso 1 1 calc GR . . . .
 H54B H 0.8440 0.2870 0.4173 0.080 Uiso 1 1 calc GR . . . .
 H54C H 0.9248 0.3073 0.4078 0.080 Uiso 1 1 calc GR . . . .
 C55 C 0.9157(3) 0.3476(2) 0.46670(9) 0.0708(11) Uani 1 1 d . . . . .
 H55A H 0.8877 0.3031 0.4713 0.106 Uiso 1 1 calc GR . . . .
 H55B H 0.9139 0.3823 0.4838 0.106 Uiso 1 1 calc GR . . . .
 H55C H 0.9666 0.3340 0.4637 0.106 Uiso 1 1 calc GR . . . .
 C56 C 0.92302(16) 0.66370(17) 0.43424(8) 0.0483(7) Uani 1 1 d . . . . .
 H56 H 0.8733 0.6627 0.4426 0.058 Uiso 1 1 calc R . . . .
 C57 C 0.91957(19) 0.71137(18) 0.40555(8) 0.0565(8) Uani 1 1 d . . . . .
 H57A H 0.9684 0.7152 0.3975 0.085 Uiso 1 1 calc GR . . . .
 H57B H 0.9019 0.7608 0.4106 0.085 Uiso 1 1 calc GR . . . .
 H57C H 0.8862 0.6888 0.3901 0.085 Uiso 1 1 calc GR . . . .
 C58 C 0.9756(2) 0.6994(2) 0.45831(8) 0.0678(11) Uani 1 1 d . . . . .
 H58A H 0.9765 0.6701 0.4772 0.102 Uiso 1 1 calc GR . . . .
 H58B H 0.9592 0.7497 0.4626 0.102 Uiso 1 1 calc GR . . . .
 H58C H 1.0248 0.7012 0.4505 0.102 Uiso 1 1 calc GR . . . .
 N2B N 0.7103(19) 0.6309(14) 0.2965(8) 0.038(3) Uani 0.307(5) 1 d . U P A 2
 C18B C 0.7236(8) 0.7057(10) 0.3054(4) 0.043(2) Uani 0.307(5) 1 d . U P A 2
 C19B C 0.6641(10) 0.7499(7) 0.3159(3) 0.0506(19) Uani 0.307(5) 1 d . U P A 2
 C20B C 0.6819(9) 0.8186(7) 0.3264(3) 0.063(2) Uani 0.307(5) 1 d . U P A 2
 H20B H 0.6447 0.8496 0.3337 0.075 Uiso 0.307(5) 1 calc R . P A 2
 C21B C 0.7549(11) 0.8451(8) 0.3268(4) 0.061(2) Uani 0.307(5) 1 d . U P A 2
 H21B H 0.7660 0.8925 0.3351 0.073 Uiso 0.307(5) 1 calc R . P A 2
 C22B C 0.8087(9) 0.8035(7) 0.3154(3) 0.0612(19) Uani 0.307(5) 1 d . U P A 2
 H22B H 0.8567 0.8232 0.3147 0.073 Uiso 0.307(5) 1 calc R . P A 2
 C23B C 0.7941(11) 0.7306(10) 0.3044(4) 0.054(2) Uani 0.307(5) 1 d . U P A 2
 C24B C 0.5885(8) 0.7181(8) 0.3183(3) 0.059(2) Uani 0.307(5) 1 d . U P A 2
 H24B H 0.5945 0.6632 0.3190 0.071 Uiso 0.307(5) 1 calc R . P A 2
 C25B C 0.5526(9) 0.7396(9) 0.3480(3) 0.071(3) Uani 0.307(5) 1 d . U P A 2
 H25D H 0.5501 0.7935 0.3495 0.107 Uiso 0.307(5) 1 calc GR . P A 2
 H25E H 0.5816 0.7200 0.3656 0.107 Uiso 0.307(5) 1 calc GR . P A 2
 H25F H 0.5032 0.7189 0.3479 0.107 Uiso 0.307(5) 1 calc GR . P A 2
 C26B C 0.5346(11) 0.7347(12) 0.2907(4) 0.092(5) Uani 0.307(5) 1 d . U P A 2
 H26D H 0.5073 0.6898 0.2851 0.138 Uiso 0.307(5) 1 calc GR . P A 2
 H26E H 0.5621 0.7513 0.2733 0.138 Uiso 0.307(5) 1 calc GR . P A 2
 H26F H 0.5005 0.7736 0.2963 0.138 Uiso 0.307(5) 1 calc GR . P A 2
 C27B C 0.8566(12) 0.6917(10) 0.2936(5) 0.066(3) Uani 0.307(5) 1 d . U P A 2
 H27B H 0.8372 0.6418 0.2877 0.080 Uiso 0.307(5) 1 calc R . P A 2
 C28B C 0.9201(12) 0.6761(12) 0.3142(6) 0.085(5) Uani 0.307(5) 1 d . U P A 2
 H28D H 0.9091 0.6343 0.3275 0.128 Uiso 0.307(5) 1 calc GR . P A 2
 H28E H 0.9316 0.7197 0.3267 0.128 Uiso 0.307(5) 1 calc GR . P A 2
 H28F H 0.9620 0.6637 0.3021 0.128 Uiso 0.307(5) 1 calc GR . P A 2
 C29B C 0.8866(18) 0.7248(11) 0.2622(7) 0.068(5) Uani 0.307(5) 1 d . U P A 2
 H29D H 0.8455 0.7335 0.2475 0.101 Uiso 0.307(5) 1 calc GR . P A 2
 H29E H 0.9205 0.6894 0.2536 0.101 Uiso 0.307(5) 1 calc GR . P A 2
 H29F H 0.9121 0.7715 0.2665 0.101 Uiso 0.307(5) 1 calc GR . P A 2

loop_
  _atom_site_aniso_label
  _atom_site_aniso_U_11
  _atom_site_aniso_U_22
  _atom_site_aniso_U_33
  _atom_site_aniso_U_23
  _atom_site_aniso_U_13
  _atom_site_aniso_U_12
 Ga1 0.02962(15) 0.02646(15) 0.02299(13) 0.00289(10) -0.00032(10) 0.00192(11)
 Ga2 0.01850(13) 0.02041(13) 0.02211(12) -0.00118(9) -0.00184(9) -0.00142(9)
 P1 0.0256(3) 0.0225(3) 0.0227(2) -0.00088(19) -0.00292(19) -0.0022(2)
 P2 0.0223(3) 0.0351(3) 0.0266(3) 0.0011(2) -0.0023(2) 0.0027(2)
 P3 0.0245(3) 0.0259(3) 0.0267(3) -0.0017(2) 0.0006(2) -0.0032(2)
 P4 0.0353(3) 0.0212(3) 0.0298(3) -0.0004(2) 0.0018(2) 0.0012(2)
 N1 0.0367(11) 0.0349(11) 0.0243(9) -0.0012(8) -0.0029(8) -0.0020(9)
 N2A 0.052(3) 0.025(4) 0.028(2) 0.013(3) 0.0103(19) 0.003(3)
 N3 0.0211(9) 0.0240(9) 0.0240(8) -0.0014(7) -0.0016(6) -0.0029(7)
 N4 0.0207(9) 0.0306(10) 0.0266(9) -0.0035(7) -0.0038(7) -0.0019(7)
 C1 0.0394(14) 0.0552(17) 0.0246(11) -0.0034(11) -0.0022(10) -0.0043(12)
 C2 0.0470(16) 0.066(2) 0.0237(11) 0.0091(12) -0.0019(10) 0.0062(14)
 C3 0.0514(17) 0.0550(17) 0.0308(12) 0.0151(12) 0.0050(11) 0.0156(14)
 C4 0.062(2) 0.069(2) 0.0285(13) -0.0117(13) -0.0040(12) -0.0127(16)
 C5 0.086(3) 0.068(2) 0.0402(16) 0.0269(15) 0.0070(16) 0.020(2)
 C6 0.0523(16) 0.0314(12) 0.0257(11) -0.0094(9) -0.0023(10) -0.0020(11)
 C7 0.0602(18) 0.0364(14) 0.0311(12) -0.0063(10) -0.0074(11) -0.0128(13)
 C8 0.073(2) 0.0357(15) 0.0434(15) -0.0074(12) -0.0021(14) -0.0128(15)
 C9 0.090(3) 0.0293(14) 0.0488(16) -0.0082(12) 0.0064(16) -0.0028(15)
 C10 0.070(2) 0.0397(16) 0.0564(18) -0.0106(13) 0.0052(15) 0.0179(15)
 C11 0.0573(18) 0.0348(14) 0.0437(14) -0.0088(11) 0.0086(12) 0.0057(13)
 C12 0.0433(16) 0.0515(17) 0.0460(15) -0.0003(13) -0.0073(12) -0.0174(13)
 C13 0.0555(19) 0.068(2) 0.0489(17) -0.0046(15) -0.0026(14) -0.0174(17)
 C14 0.053(2) 0.113(3) 0.0436(17) -0.0049(19) -0.0058(14) -0.033(2)
 C15 0.0470(18) 0.0441(17) 0.083(2) 0.0022(16) 0.0156(16) 0.0152(14)
 C16 0.055(2) 0.055(2) 0.100(3) -0.022(2) 0.013(2) 0.0084(17)
 C17 0.052(2) 0.095(3) 0.076(3) 0.006(2) 0.0192(18) 0.007(2)
 C18A 0.073(4) 0.024(2) 0.0359(19) 0.0057(16) 0.011(3) -0.003(3)
 C19A 0.077(3) 0.032(2) 0.0388(19) 0.0051(15) -0.003(2) 0.011(2)
 C20A 0.097(4) 0.032(3) 0.054(3) -0.005(2) 0.007(3) 0.002(3)
 C21A 0.105(4) 0.035(2) 0.065(3) -0.006(2) 0.011(3) -0.019(3)
 C22A 0.086(4) 0.044(3) 0.072(3) -0.004(2) 0.024(3) -0.024(3)
 C23A 0.075(3) 0.037(2) 0.061(2) -0.004(2) 0.030(3) -0.024(3)
 C24A 0.074(4) 0.051(3) 0.054(3) -0.002(2) -0.009(3) 0.026(3)
 C25A 0.079(4) 0.063(3) 0.056(3) 0.014(3) 0.001(3) 0.022(3)
 C26A 0.094(5) 0.149(7) 0.051(3) 0.010(4) 0.009(3) 0.060(5)
 C27A 0.067(4) 0.052(4) 0.090(3) -0.021(3) 0.039(3) -0.024(3)
 C28A 0.103(6) 0.053(4) 0.116(5) 0.014(4) 0.062(5) -0.009(4)
 C29A 0.063(5) 0.120(9) 0.077(4) -0.032(6) 0.017(4) -0.032(6)
 C30 0.0311(12) 0.0247(10) 0.0256(10) -0.0025(8) 0.0017(8) -0.0023(9)
 C31 0.0301(12) 0.0414(13) 0.0226(10) -0.0045(9) -0.0044(9) -0.0024(10)
 C32 0.0276(12) 0.0391(13) 0.0283(11) -0.0044(9) -0.0073(9) -0.0030(10)
 C33 0.0336(12) 0.0416(14) 0.0261(11) -0.0026(10) 0.0040(9) -0.0051(11)
 C34 0.0304(13) 0.073(2) 0.0334(13) -0.0086(13) -0.0109(10) -0.0003(13)
 C35 0.0218(10) 0.0295(11) 0.0242(10) -0.0013(8) 0.0016(8) -0.0052(9)
 C36 0.0293(12) 0.0298(12) 0.0295(11) -0.0023(9) 0.0049(9) -0.0083(9)
 C37 0.0316(13) 0.0401(14) 0.0423(13) -0.0118(11) 0.0058(10) -0.0147(11)
 C38 0.0234(12) 0.0573(17) 0.0468(15) -0.0146(13) 0.0009(10) -0.0114(11)
 C39 0.0222(11) 0.0526(16) 0.0386(13) -0.0057(11) 0.0013(9) 0.0011(11)
 C40 0.0222(11) 0.0355(12) 0.0285(11) -0.0019(9) 0.0023(8) 0.0000(9)
 C41 0.0322(12) 0.0233(11) 0.0428(13) -0.0023(9) 0.0051(10) -0.0056(9)
 C42 0.0544(17) 0.0285(13) 0.0465(15) -0.0030(11) 0.0114(12) -0.0021(12)
 C43 0.0535(17) 0.0351(14) 0.0424(14) -0.0006(11) -0.0023(12) 0.0026(12)
 C44 0.0261(12) 0.0324(12) 0.0442(13) -0.0017(10) 0.0056(10) 0.0037(10)
 C45 0.062(2) 0.0442(16) 0.0551(17) 0.0119(13) 0.0202(15) 0.0209(15)
 C46 0.0373(14) 0.0419(15) 0.0450(14) -0.0097(11) 0.0075(11) 0.0036(11)
 C47 0.0164(10) 0.0420(13) 0.0324(11) -0.0072(10) -0.0042(8) -0.0005(9)
 C48 0.0252(12) 0.0421(14) 0.0424(13) -0.0005(11) -0.0032(10) 0.0053(10)
 C49 0.0342(15) 0.0541(18) 0.071(2) -0.0108(15) 0.0119(14) 0.0100(13)
 C50 0.0333(16) 0.075(2) 0.090(3) -0.020(2) 0.0239(16) -0.0035(16)
 C51 0.0326(15) 0.062(2) 0.075(2) -0.0167(17) 0.0171(14) -0.0152(14)
 C52 0.0261(12) 0.0499(16) 0.0475(15) -0.0135(12) 0.0019(10) -0.0105(11)
 C53 0.0340(14) 0.0361(14) 0.0590(17) 0.0057(12) 0.0046(12) 0.0135(11)
 C54 0.0497(18) 0.0392(16) 0.071(2) -0.0019(14) -0.0079(15) 0.0079(13)
 C55 0.099(3) 0.055(2) 0.058(2) 0.0129(17) 0.002(2) 0.018(2)
 C56 0.0360(14) 0.0425(16) 0.0673(19) -0.0212(14) 0.0128(13) -0.0197(12)
 C57 0.0512(18) 0.0426(17) 0.075(2) -0.0125(15) -0.0010(15) -0.0202(14)
 C58 0.082(3) 0.065(2) 0.057(2) -0.0208(17) 0.0136(18) -0.039(2)
 N2B 0.061(6) 0.020(6) 0.033(5) 0.011(5) 0.010(5) 0.005(5)
 C18B 0.066(4) 0.026(3) 0.038(3) 0.015(3) 0.013(4) -0.001(4)
 C19B 0.072(4) 0.039(3) 0.042(3) 0.010(3) 0.020(4) 0.005(4)
 C20B 0.093(5) 0.041(4) 0.056(4) 0.003(3) 0.012(4) 0.003(4)
 C21B 0.093(5) 0.035(4) 0.055(4) 0.004(4) 0.015(4) -0.015(4)
 C22B 0.089(4) 0.035(3) 0.061(3) 0.003(3) 0.016(4) -0.017(4)
 C23B 0.074(4) 0.036(3) 0.054(3) 0.005(3) 0.017(4) -0.010(4)
 C24B 0.071(6) 0.055(5) 0.053(5) 0.012(4) 0.015(4) 0.028(4)
 C25B 0.079(8) 0.076(8) 0.061(6) 0.017(6) 0.016(6) 0.024(6)
 C26B 0.093(10) 0.116(11) 0.065(8) 0.016(8) 0.001(7) 0.041(8)
 C27B 0.073(5) 0.046(5) 0.081(5) 0.004(5) 0.022(5) -0.025(5)
 C28B 0.091(10) 0.074(10) 0.092(8) 0.038(8) 0.021(8) -0.009(8)
 C29B 0.075(9) 0.052(8) 0.076(9) 0.014(7) 0.008(7) -0.028(7)

_geom_special_details
;
 All esds (except the esd in the dihedral angle between two l.s. planes)
 are estimated using the full covariance matrix.  The cell esds are taken
 into account individually in the estimation of esds in distances, angles
 and torsion angles; correlations between esds in cell parameters are only
 used when they are defined by crystal symmetry.  An approximate (isotropic)
 treatment of cell esds is used for estimating esds involving l.s. planes.
;
loop_
  _geom_bond_atom_site_label_1
  _geom_bond_atom_site_label_2
  _geom_bond_distance
  _geom_bond_site_symmetry_2
  _geom_bond_publ_flag
 Ga1 P2 2.3889(6) . ?
 Ga1 P3 2.3720(6) . ?
 Ga1 N1 1.962(2) . ?
 Ga1 N2A 2.021(11) . ?
 Ga1 N2B 1.80(3) . ?
 Ga2 P1 2.3604(6) . ?
 Ga2 P4 2.4013(6) . ?
 Ga2 N3 1.9590(18) . ?
 Ga2 N4 1.9692(18) . ?
 P1 P2 2.2701(8) . ?
 P1 P3 2.2637(8) . ?
 P2 P4 2.2654(8) . ?
 P3 P4 2.2682(8) . ?
 N1 C1 1.334(3) . ?
 N1 C6 1.443(3) . ?
 N2A C3 1.335(15) . ?
 N2A C18A 1.462(12) . ?
 N3 C30 1.331(3) . ?
 N3 C35 1.443(3) . ?
 N4 C32 1.331(3) . ?
 N4 C47 1.448(3) . ?
 C1 C2 1.409(4) . ?
 C1 C4 1.506(4) . ?
 C2 H2 0.9500 . ?
 C2 C3 1.383(5) . ?
 C3 C5 1.519(4) . ?
 C3 N2B 1.37(4) . ?
 C4 H4A 0.9800 . ?
 C4 H4B 0.9800 . ?
 C4 H4C 0.9800 . ?
 C5 H5A 0.9800 . ?
 C5 H5B 0.9800 . ?
 C5 H5C 0.9800 . ?
 C6 C7 1.412(4) . ?
 C6 C11 1.392(4) . ?
 C7 C8 1.393(4) . ?
 C7 C12 1.532(5) . ?
 C8 H8 0.9500 . ?
 C8 C9 1.366(5) . ?
 C9 H9 0.9500 . ?
 C9 C10 1.385(5) . ?
 C10 H10 0.9500 . ?
 C10 C11 1.399(4) . ?
 C11 C15 1.511(5) . ?
 C12 H12 1.0000 . ?
 C12 C13 1.516(4) . ?
 C12 C14 1.525(4) . ?
 C13 H13A 0.9800 . ?
 C13 H13B 0.9800 . ?
 C13 H13C 0.9800 . ?
 C14 H14A 0.9800 . ?
 C14 H14B 0.9800 . ?
 C14 H14C 0.9800 . ?
 C15 H15 1.0000 . ?
 C15 C16 1.533(6) . ?
 C15 C17 1.543(5) . ?
 C16 H16A 0.9800 . ?
 C16 H16B 0.9800 . ?
 C16 H16C 0.9800 . ?
 C17 H17A 0.9800 . ?
 C17 H17B 0.9800 . ?
 C17 H17C 0.9800 . ?
 C18A C19A 1.397(9) . ?
 C18A C23A 1.383(8) . ?
 C19A C20A 1.393(8) . ?
 C19A C24A 1.535(9) . ?
 C20A H20A 0.9500 . ?
 C20A C21A 1.393(11) . ?
 C21A H21A 0.9500 . ?
 C21A C22A 1.380(9) . ?
 C22A H22A 0.9500 . ?
 C22A C23A 1.389(8) . ?
 C23A C27A 1.504(9) . ?
 C24A H24A 1.0000 . ?
 C24A C25A 1.505(8) . ?
 C24A C26A 1.529(8) . ?
 C25A H25A 0.9800 . ?
 C25A H25B 0.9800 . ?
 C25A H25C 0.9800 . ?
 C26A H26A 0.9800 . ?
 C26A H26B 0.9800 . ?
 C26A H26C 0.9800 . ?
 C27A H27A 1.0000 . ?
 C27A C28A 1.577(15) . ?
 C27A C29A 1.488(16) . ?
 C28A H28A 0.9800 . ?
 C28A H28B 0.9800 . ?
 C28A H28C 0.9800 . ?
 C29A H29A 0.9800 . ?
 C29A H29B 0.9800 . ?
 C29A H29C 0.9800 . ?
 C30 C31 1.397(3) . ?
 C30 C33 1.512(3) . ?
 C31 H31 0.9500 . ?
 C31 C32 1.401(3) . ?
 C32 C34 1.508(3) . ?
 C33 H33A 0.9800 . ?
 C33 H33B 0.9800 . ?
 C33 H33C 0.9800 . ?
 C34 H34A 0.9800 . ?
 C34 H34B 0.9800 . ?
 C34 H34C 0.9800 . ?
 C35 C36 1.411(3) . ?
 C35 C40 1.404(3) . ?
 C36 C37 1.389(3) . ?
 C36 C41 1.522(4) . ?
 C37 H37 0.9500 . ?
 C37 C38 1.383(4) . ?
 C38 H38 0.9500 . ?
 C38 C39 1.377(4) . ?
 C39 H39 0.9500 . ?
 C39 C40 1.398(3) . ?
 C40 C44 1.517(3) . ?
 C41 H41 1.0000 . ?
 C41 C42 1.530(3) . ?
 C41 C43 1.531(4) . ?
 C42 H42A 0.9800 . ?
 C42 H42B 0.9800 . ?
 C42 H42C 0.9800 . ?
 C43 H43A 0.9800 . ?
 C43 H43B 0.9800 . ?
 C43 H43C 0.9800 . ?
 C44 H44 1.0000 . ?
 C44 C45 1.527(4) . ?
 C44 C46 1.536(3) . ?
 C45 H45A 0.9800 . ?
 C45 H45B 0.9800 . ?
 C45 H45C 0.9800 . ?
 C46 H46A 0.9800 . ?
 C46 H46B 0.9800 . ?
 C46 H46C 0.9800 . ?
 C47 C48 1.406(4) . ?
 C47 C52 1.398(4) . ?
 C48 C49 1.392(4) . ?
 C48 C53 1.502(4) . ?
 C49 H49 0.9500 . ?
 C49 C50 1.375(5) . ?
 C50 H50 0.9500 . ?
 C50 C51 1.373(5) . ?
 C51 H51 0.9500 . ?
 C51 C52 1.394(4) . ?
 C52 C56 1.521(4) . ?
 C53 H53 1.0000 . ?
 C53 C54 1.532(4) . ?
 C53 C55 1.530(4) . ?
 C54 H54A 0.9800 . ?
 C54 H54B 0.9800 . ?
 C54 H54C 0.9800 . ?
 C55 H55A 0.9800 . ?
 C55 H55B 0.9800 . ?
 C55 H55C 0.9800 . ?
 C56 H56 1.0000 . ?
 C56 C57 1.523(5) . ?
 C56 C58 1.537(4) . ?
 C57 H57A 0.9800 . ?
 C57 H57B 0.9800 . ?
 C57 H57C 0.9800 . ?
 C58 H58A 0.9800 . ?
 C58 H58B 0.9800 . ?
 C58 H58C 0.9800 . ?
 N2B C18B 1.43(3) . ?
 C18B C19B 1.45(2) . ?
 C18B C23B 1.37(2) . ?
 C19B C20B 1.361(18) . ?
 C19B C24B 1.51(2) . ?
 C20B H20B 0.9500 . ?
 C20B C21B 1.42(2) . ?
 C21B H21B 0.9500 . ?
 C21B C22B 1.36(2) . ?
 C22B H22B 0.9500 . ?
 C22B C23B 1.43(2) . ?
 C23B C27B 1.44(2) . ?
 C24B H24B 1.0000 . ?
 C24B C25B 1.535(18) . ?
 C24B C26B 1.55(2) . ?
 C25B H25D 0.9800 . ?
 C25B H25E 0.9800 . ?
 C25B H25F 0.9800 . ?
 C26B H26D 0.9800 . ?
 C26B H26E 0.9800 . ?
 C26B H26F 0.9800 . ?
 C27B H27B 1.0000 . ?
 C27B C28B 1.47(3) . ?
 C27B C29B 1.62(3) . ?
 C28B H28D 0.9800 . ?
 C28B H28E 0.9800 . ?
 C28B H28F 0.9800 . ?
 C29B H29D 0.9800 . ?
 C29B H29E 0.9800 . ?
 C29B H29F 0.9800 . ?

loop_
  _geom_angle_atom_site_label_1
  _geom_angle_atom_site_label_2
  _geom_angle_atom_site_label_3
  _geom_angle
  _geom_angle_site_symmetry_1
  _geom_angle_site_symmetry_3
  _geom_angle_publ_flag
 P3 Ga1 P2 78.65(2) . . ?
 N1 Ga1 P2 118.54(6) . . ?
 N1 Ga1 P3 120.09(6) . . ?
 N1 Ga1 N2A 96.9(4) . . ?
 N2A Ga1 P2 125.7(4) . . ?
 N2A Ga1 P3 119.1(4) . . ?
 N2B Ga1 P2 124.2(11) . . ?
 N2B Ga1 P3 124.8(11) . . ?
 N2B Ga1 N1 93.7(11) . . ?
 P1 Ga2 P4 78.87(2) . . ?
 N3 Ga2 P1 119.02(5) . . ?
 N3 Ga2 P4 125.39(6) . . ?
 N3 Ga2 N4 95.82(8) . . ?
 N4 Ga2 P1 120.46(6) . . ?
 N4 Ga2 P4 119.75(6) . . ?
 P2 P1 Ga2 81.67(2) . . ?
 P3 P1 Ga2 80.16(2) . . ?
 P3 P1 P2 83.44(3) . . ?
 P1 P2 Ga1 78.83(2) . . ?
 P4 P2 Ga1 81.98(3) . . ?
 P4 P2 P1 83.66(3) . . ?
 P1 P3 Ga1 79.31(2) . . ?
 P1 P3 P4 83.74(3) . . ?
 P4 P3 Ga1 82.30(2) . . ?
 P2 P4 Ga2 80.87(2) . . ?
 P2 P4 P3 83.44(3) . . ?
 P3 P4 Ga2 79.20(2) . . ?
 C1 N1 Ga1 122.98(19) . . ?
 C1 N1 C6 121.0(2) . . ?
 C6 N1 Ga1 116.00(14) . . ?
 C3 N2A Ga1 118.9(7) . . ?
 C3 N2A C18A 126.4(8) . . ?
 C18A N2A Ga1 113.8(9) . . ?
 C30 N3 Ga2 122.45(15) . . ?
 C30 N3 C35 121.77(18) . . ?
 C35 N3 Ga2 115.75(13) . . ?
 C32 N4 Ga2 122.00(16) . . ?
 C32 N4 C47 121.25(19) . . ?
 C47 N4 Ga2 116.71(14) . . ?
 N1 C1 C2 123.5(3) . . ?
 N1 C1 C4 120.2(3) . . ?
 C2 C1 C4 116.3(2) . . ?
 C1 C2 H2 115.4 . . ?
 C3 C2 C1 129.2(2) . . ?
 C3 C2 H2 115.4 . . ?
 N2A C3 C2 126.8(5) . . ?
 N2A C3 C5 116.6(5) . . ?
 C2 C3 C5 116.6(3) . . ?
 N2B C3 C2 116.0(11) . . ?
 N2B C3 C5 127.4(11) . . ?
 C1 C4 H4A 109.5 . . ?
 C1 C4 H4B 109.5 . . ?
 C1 C4 H4C 109.5 . . ?
 H4A C4 H4B 109.5 . . ?
 H4A C4 H4C 109.5 . . ?
 H4B C4 H4C 109.5 . . ?
 C3 C5 H5A 109.5 . . ?
 C3 C5 H5B 109.5 . . ?
 C3 C5 H5C 109.5 . . ?
 H5A C5 H5B 109.5 . . ?
 H5A C5 H5C 109.5 . . ?
 H5B C5 H5C 109.5 . . ?
 C7 C6 N1 118.8(3) . . ?
 C11 C6 N1 118.9(2) . . ?
 C11 C6 C7 122.1(3) . . ?
 C6 C7 C12 123.0(3) . . ?
 C8 C7 C6 117.7(3) . . ?
 C8 C7 C12 119.3(3) . . ?
 C7 C8 H8 119.5 . . ?
 C9 C8 C7 120.9(3) . . ?
 C9 C8 H8 119.5 . . ?
 C8 C9 H9 119.6 . . ?
 C8 C9 C10 120.8(3) . . ?
 C10 C9 H9 119.6 . . ?
 C9 C10 H10 119.6 . . ?
 C9 C10 C11 120.8(3) . . ?
 C11 C10 H10 119.6 . . ?
 C6 C11 C10 117.6(3) . . ?
 C6 C11 C15 122.9(3) . . ?
 C10 C11 C15 119.5(3) . . ?
 C7 C12 H12 107.5 . . ?
 C13 C12 C7 112.9(3) . . ?
 C13 C12 H12 107.5 . . ?
 C13 C12 C14 109.5(3) . . ?
 C14 C12 C7 111.6(3) . . ?
 C14 C12 H12 107.5 . . ?
 C12 C13 H13A 109.5 . . ?
 C12 C13 H13B 109.5 . . ?
 C12 C13 H13C 109.5 . . ?
 H13A C13 H13B 109.5 . . ?
 H13A C13 H13C 109.5 . . ?
 H13B C13 H13C 109.5 . . ?
 C12 C14 H14A 109.5 . . ?
 C12 C14 H14B 109.5 . . ?
 C12 C14 H14C 109.5 . . ?
 H14A C14 H14B 109.5 . . ?
 H14A C14 H14C 109.5 . . ?
 H14B C14 H14C 109.5 . . ?
 C11 C15 H15 108.0 . . ?
 C11 C15 C16 112.6(3) . . ?
 C11 C15 C17 109.9(3) . . ?
 C16 C15 H15 108.0 . . ?
 C16 C15 C17 110.2(3) . . ?
 C17 C15 H15 108.0 . . ?
 C15 C16 H16A 109.5 . . ?
 C15 C16 H16B 109.5 . . ?
 C15 C16 H16C 109.5 . . ?
 H16A C16 H16B 109.5 . . ?
 H16A C16 H16C 109.5 . . ?
 H16B C16 H16C 109.5 . . ?
 C15 C17 H17A 109.5 . . ?
 C15 C17 H17B 109.5 . . ?
 C15 C17 H17C 109.5 . . ?
 H17A C17 H17B 109.5 . . ?
 H17A C17 H17C 109.5 . . ?
 H17B C17 H17C 109.5 . . ?
 C19A C18A N2A 118.6(8) . . ?
 C23A C18A N2A 119.1(7) . . ?
 C23A C18A C19A 122.3(6) . . ?
 C18A C19A C24A 122.8(5) . . ?
 C20A C19A C18A 117.7(6) . . ?
 C20A C19A C24A 119.5(5) . . ?
 C19A C20A H20A 119.6 . . ?
 C21A C20A C19A 120.7(6) . . ?
 C21A C20A H20A 119.6 . . ?
 C20A C21A H21A 120.0 . . ?
 C22A C21A C20A 120.0(5) . . ?
 C22A C21A H21A 120.0 . . ?
 C21A C22A H22A 119.7 . . ?
 C21A C22A C23A 120.6(7) . . ?
 C23A C22A H22A 119.7 . . ?
 C18A C23A C22A 118.6(7) . . ?
 C18A C23A C27A 121.6(6) . . ?
 C22A C23A C27A 119.7(6) . . ?
 C19A C24A H24A 106.3 . . ?
 C25A C24A C19A 113.8(5) . . ?
 C25A C24A H24A 106.3 . . ?
 C25A C24A C26A 109.3(5) . . ?
 C26A C24A C19A 114.2(6) . . ?
 C26A C24A H24A 106.3 . . ?
 C24A C25A H25A 109.5 . . ?
 C24A C25A H25B 109.5 . . ?
 C24A C25A H25C 109.5 . . ?
 H25A C25A H25B 109.5 . . ?
 H25A C25A H25C 109.5 . . ?
 H25B C25A H25C 109.5 . . ?
 C24A C26A H26A 109.5 . . ?
 C24A C26A H26B 109.5 . . ?
 C24A C26A H26C 109.5 . . ?
 H26A C26A H26B 109.5 . . ?
 H26A C26A H26C 109.5 . . ?
 H26B C26A H26C 109.5 . . ?
 C23A C27A H27A 107.9 . . ?
 C23A C27A C28A 111.2(7) . . ?
 C28A C27A H27A 107.9 . . ?
 C29A C27A C23A 112.0(8) . . ?
 C29A C27A H27A 107.9 . . ?
 C29A C27A C28A 109.9(8) . . ?
 C27A C28A H28A 109.5 . . ?
 C27A C28A H28B 109.5 . . ?
 C27A C28A H28C 109.5 . . ?
 H28A C28A H28B 109.5 . . ?
 H28A C28A H28C 109.5 . . ?
 H28B C28A H28C 109.5 . . ?
 C27A C29A H29A 109.5 . . ?
 C27A C29A H29B 109.5 . . ?
 C27A C29A H29C 109.5 . . ?
 H29A C29A H29B 109.5 . . ?
 H29A C29A H29C 109.5 . . ?
 H29B C29A H29C 109.5 . . ?
 N3 C30 C31 123.6(2) . . ?
 N3 C30 C33 119.7(2) . . ?
 C31 C30 C33 116.7(2) . . ?
 C30 C31 H31 115.6 . . ?
 C30 C31 C32 128.8(2) . . ?
 C32 C31 H31 115.6 . . ?
 N4 C32 C31 123.8(2) . . ?
 N4 C32 C34 120.2(2) . . ?
 C31 C32 C34 115.9(2) . . ?
 C30 C33 H33A 109.5 . . ?
 C30 C33 H33B 109.5 . . ?
 C30 C33 H33C 109.5 . . ?
 H33A C33 H33B 109.5 . . ?
 H33A C33 H33C 109.5 . . ?
 H33B C33 H33C 109.5 . . ?
 C32 C34 H34A 109.5 . . ?
 C32 C34 H34B 109.5 . . ?
 C32 C34 H34C 109.5 . . ?
 H34A C34 H34B 109.5 . . ?
 H34A C34 H34C 109.5 . . ?
 H34B C34 H34C 109.5 . . ?
 C36 C35 N3 118.0(2) . . ?
 C40 C35 N3 120.4(2) . . ?
 C40 C35 C36 121.5(2) . . ?
 C35 C36 C41 121.7(2) . . ?
 C37 C36 C35 117.9(2) . . ?
 C37 C36 C41 120.4(2) . . ?
 C36 C37 H37 119.2 . . ?
 C38 C37 C36 121.5(2) . . ?
 C38 C37 H37 119.2 . . ?
 C37 C38 H38 120.1 . . ?
 C39 C38 C37 119.8(2) . . ?
 C39 C38 H38 120.1 . . ?
 C38 C39 H39 119.3 . . ?
 C38 C39 C40 121.4(2) . . ?
 C40 C39 H39 119.3 . . ?
 C35 C40 C44 122.7(2) . . ?
 C39 C40 C35 117.9(2) . . ?
 C39 C40 C44 119.5(2) . . ?
 C36 C41 H41 107.3 . . ?
 C36 C41 C42 113.6(2) . . ?
 C36 C41 C43 110.6(2) . . ?
 C42 C41 H41 107.3 . . ?
 C42 C41 C43 110.3(2) . . ?
 C43 C41 H41 107.3 . . ?
 C41 C42 H42A 109.5 . . ?
 C41 C42 H42B 109.5 . . ?
 C41 C42 H42C 109.5 . . ?
 H42A C42 H42B 109.5 . . ?
 H42A C42 H42C 109.5 . . ?
 H42B C42 H42C 109.5 . . ?
 C41 C43 H43A 109.5 . . ?
 C41 C43 H43B 109.5 . . ?
 C41 C43 H43C 109.5 . . ?
 H43A C43 H43B 109.5 . . ?
 H43A C43 H43C 109.5 . . ?
 H43B C43 H43C 109.5 . . ?
 C40 C44 H44 108.2 . . ?
 C40 C44 C45 111.0(2) . . ?
 C40 C44 C46 111.5(2) . . ?
 C45 C44 H44 108.2 . . ?
 C45 C44 C46 109.5(2) . . ?
 C46 C44 H44 108.2 . . ?
 C44 C45 H45A 109.5 . . ?
 C44 C45 H45B 109.5 . . ?
 C44 C45 H45C 109.5 . . ?
 H45A C45 H45B 109.5 . . ?
 H45A C45 H45C 109.5 . . ?
 H45B C45 H45C 109.5 . . ?
 C44 C46 H46A 109.5 . . ?
 C44 C46 H46B 109.5 . . ?
 C44 C46 H46C 109.5 . . ?
 H46A C46 H46B 109.5 . . ?
 H46A C46 H46C 109.5 . . ?
 H46B C46 H46C 109.5 . . ?
 C48 C47 N4 118.3(2) . . ?
 C52 C47 N4 119.9(2) . . ?
 C52 C47 C48 121.6(2) . . ?
 C47 C48 C53 122.9(2) . . ?
 C49 C48 C47 117.9(3) . . ?
 C49 C48 C53 119.2(3) . . ?
 C48 C49 H49 119.4 . . ?
 C50 C49 C48 121.1(3) . . ?
 C50 C49 H49 119.4 . . ?
 C49 C50 H50 120.0 . . ?
 C51 C50 C49 120.0(3) . . ?
 C51 C50 H50 120.0 . . ?
 C50 C51 H51 119.2 . . ?
 C50 C51 C52 121.6(3) . . ?
 C52 C51 H51 119.2 . . ?
 C47 C52 C56 123.3(2) . . ?
 C51 C52 C47 117.6(3) . . ?
 C51 C52 C56 119.1(3) . . ?
 C48 C53 H53 107.7 . . ?
 C48 C53 C54 112.6(3) . . ?
 C48 C53 C55 110.7(3) . . ?
 C54 C53 H53 107.7 . . ?
 C55 C53 H53 107.7 . . ?
 C55 C53 C54 110.3(3) . . ?
 C53 C54 H54A 109.5 . . ?
 C53 C54 H54B 109.5 . . ?
 C53 C54 H54C 109.5 . . ?
 H54A C54 H54B 109.5 . . ?
 H54A C54 H54C 109.5 . . ?
 H54B C54 H54C 109.5 . . ?
 C53 C55 H55A 109.5 . . ?
 C53 C55 H55B 109.5 . . ?
 C53 C55 H55C 109.5 . . ?
 H55A C55 H55B 109.5 . . ?
 H55A C55 H55C 109.5 . . ?
 H55B C55 H55C 109.5 . . ?
 C52 C56 H56 108.1 . . ?
 C52 C56 C57 112.8(3) . . ?
 C52 C56 C58 110.6(3) . . ?
 C57 C56 H56 108.1 . . ?
 C57 C56 C58 109.1(3) . . ?
 C58 C56 H56 108.1 . . ?
 C56 C57 H57A 109.5 . . ?
 C56 C57 H57B 109.5 . . ?
 C56 C57 H57C 109.5 . . ?
 H57A C57 H57B 109.5 . . ?
 H57A C57 H57C 109.5 . . ?
 H57B C57 H57C 109.5 . . ?
 C56 C58 H58A 109.5 . . ?
 C56 C58 H58B 109.5 . . ?
 C56 C58 H58C 109.5 . . ?
 H58A C58 H58B 109.5 . . ?
 H58A C58 H58C 109.5 . . ?
 H58B C58 H58C 109.5 . . ?
 C3 N2B Ga1 133(2) . . ?
 C3 N2B C18B 106.9(18) . . ?
 C18B N2B Ga1 119(2) . . ?
 N2B C18B C19B 119.4(17) . . ?
 C23B C18B N2B 116.9(19) . . ?
 C23B C18B C19B 123.7(16) . . ?
 C18B C19B C24B 121.4(12) . . ?
 C20B C19B C18B 116.2(15) . . ?
 C20B C19B C24B 122.1(14) . . ?
 C19B C20B H20B 119.3 . . ?
 C19B C20B C21B 121.5(14) . . ?
 C21B C20B H20B 119.3 . . ?
 C20B C21B H21B 119.6 . . ?
 C22B C21B C20B 120.7(14) . . ?
 C22B C21B H21B 119.6 . . ?
 C21B C22B H22B 119.7 . . ?
 C21B C22B C23B 120.6(15) . . ?
 C23B C22B H22B 119.7 . . ?
 C18B C23B C22B 117.2(17) . . ?
 C18B C23B C27B 127.8(17) . . ?
 C22B C23B C27B 115.0(18) . . ?
 C19B C24B H24B 106.3 . . ?
 C19B C24B C25B 113.3(13) . . ?
 C19B C24B C26B 115.0(12) . . ?
 C25B C24B H24B 106.3 . . ?
 C25B C24B C26B 109.1(12) . . ?
 C26B C24B H24B 106.3 . . ?
 C24B C25B H25D 109.5 . . ?
 C24B C25B H25E 109.5 . . ?
 C24B C25B H25F 109.5 . . ?
 H25D C25B H25E 109.5 . . ?
 H25D C25B H25F 109.5 . . ?
 H25E C25B H25F 109.5 . . ?
 C24B C26B H26D 109.5 . . ?
 C24B C26B H26E 109.5 . . ?
 C24B C26B H26F 109.5 . . ?
 H26D C26B H26E 109.5 . . ?
 H26D C26B H26F 109.5 . . ?
 H26E C26B H26F 109.5 . . ?
 C23B C27B H27B 104.3 . . ?
 C23B C27B C28B 120.7(19) . . ?
 C23B C27B C29B 114.0(17) . . ?
 C28B C27B H27B 104.3 . . ?
 C28B C27B C29B 107.5(18) . . ?
 C29B C27B H27B 104.3 . . ?
 C27B C28B H28D 109.5 . . ?
 C27B C28B H28E 109.5 . . ?
 C27B C28B H28F 109.5 . . ?
 H28D C28B H28E 109.5 . . ?
 H28D C28B H28F 109.5 . . ?
 H28E C28B H28F 109.5 . . ?
 C27B C29B H29D 109.5 . . ?
 C27B C29B H29E 109.5 . . ?
 C27B C29B H29F 109.5 . . ?
 H29D C29B H29E 109.5 . . ?
 H29D C29B H29F 109.5 . . ?
 H29E C29B H29F 109.5 . . ?

loop_
  _geom_torsion_atom_site_label_1
  _geom_torsion_atom_site_label_2
  _geom_torsion_atom_site_label_3
  _geom_torsion_atom_site_label_4
  _geom_torsion
  _geom_torsion_site_symmetry_1
  _geom_torsion_site_symmetry_2
  _geom_torsion_site_symmetry_3
  _geom_torsion_site_symmetry_4
  _geom_torsion_publ_flag
 Ga1 N1 C1 C2 2.2(4) . . . . ?
 Ga1 N1 C1 C4 -179.5(2) . . . . ?
 Ga1 N1 C6 C7 89.1(2) . . . . ?
 Ga1 N1 C6 C11 -86.4(2) . . . . ?
 Ga1 N2A C3 C2 -6.0(12) . . . . ?
 Ga1 N2A C3 C5 177.1(5) . . . . ?
 Ga1 N2A C18A C19A -90.4(9) . . . . ?
 Ga1 N2A C18A C23A 87.0(9) . . . . ?
 Ga1 N2B C18B C19B -89(3) . . . . ?
 Ga1 N2B C18B C23B 88(2) . . . . ?
 Ga2 N3 C30 C31 -7.8(3) . . . . ?
 Ga2 N3 C30 C33 172.89(17) . . . . ?
 Ga2 N3 C35 C36 78.8(2) . . . . ?
 Ga2 N3 C35 C40 -96.9(2) . . . . ?
 Ga2 N4 C32 C31 5.5(4) . . . . ?
 Ga2 N4 C32 C34 -174.7(2) . . . . ?
 Ga2 N4 C47 C48 -83.9(2) . . . . ?
 Ga2 N4 C47 C52 92.2(2) . . . . ?
 P2 Ga1 N2B C3 -128(3) . . . . ?
 P2 Ga1 N2B C18B 63(3) . . . . ?
 P3 Ga1 N2B C3 132(3) . . . . ?
 P3 Ga1 N2B C18B -38(3) . . . . ?
 N1 Ga1 N2B C3 1(3) . . . . ?
 N1 Ga1 N2B C18B -169(2) . . . . ?
 N1 C1 C2 C3 9.2(5) . . . . ?
 N1 C6 C7 C8 -178.0(2) . . . . ?
 N1 C6 C7 C12 0.2(4) . . . . ?
 N1 C6 C11 C10 177.1(2) . . . . ?
 N1 C6 C11 C15 -3.2(4) . . . . ?
 N2A C18A C19A C20A 179.7(7) . . . . ?
 N2A C18A C19A C24A 0.3(10) . . . . ?
 N2A C18A C23A C22A -178.3(8) . . . . ?
 N2A C18A C23A C27A 4.5(11) . . . . ?
 N3 C30 C31 C32 -9.9(4) . . . . ?
 N3 C35 C36 C37 -175.3(2) . . . . ?
 N3 C35 C36 C41 7.2(3) . . . . ?
 N3 C35 C40 C39 175.7(2) . . . . ?
 N3 C35 C40 C44 -4.6(3) . . . . ?
 N4 C47 C48 C49 179.4(2) . . . . ?
 N4 C47 C48 C53 -2.1(4) . . . . ?
 N4 C47 C52 C51 -179.2(3) . . . . ?
 N4 C47 C52 C56 1.2(4) . . . . ?
 C1 N1 C6 C7 -92.4(3) . . . . ?
 C1 N1 C6 C11 92.0(3) . . . . ?
 C1 C2 C3 N2A -6.8(9) . . . . ?
 C1 C2 C3 C5 170.1(3) . . . . ?
 C1 C2 C3 N2B -13.8(17) . . . . ?
 C2 C3 N2B Ga1 7(4) . . . . ?
 C2 C3 N2B C18B 178.3(13) . . . . ?
 C3 N2A C18A C19A 100.5(12) . . . . ?
 C3 N2A C18A C23A -82.0(14) . . . . ?
 C3 N2B C18B C19B 98(2) . . . . ?
 C3 N2B C18B C23B -84(3) . . . . ?
 C4 C1 C2 C3 -169.1(3) . . . . ?
 C5 C3 N2B Ga1 -176.9(18) . . . . ?
 C5 C3 N2B C18B -6(3) . . . . ?
 C6 N1 C1 C2 -176.2(3) . . . . ?
 C6 N1 C1 C4 2.1(4) . . . . ?
 C6 C7 C8 C9 1.3(4) . . . . ?
 C6 C7 C12 C13 -134.3(3) . . . . ?
 C6 C7 C12 C14 101.8(3) . . . . ?
 C6 C11 C15 C16 129.7(3) . . . . ?
 C6 C11 C15 C17 -107.1(3) . . . . ?
 C7 C6 C11 C10 1.7(4) . . . . ?
 C7 C6 C11 C15 -178.6(3) . . . . ?
 C7 C8 C9 C10 0.7(5) . . . . ?
 C8 C7 C12 C13 43.9(4) . . . . ?
 C8 C7 C12 C14 -80.0(3) . . . . ?
 C8 C9 C10 C11 -1.5(5) . . . . ?
 C9 C10 C11 C6 0.3(4) . . . . ?
 C9 C10 C11 C15 -179.3(3) . . . . ?
 C10 C11 C15 C16 -50.7(4) . . . . ?
 C10 C11 C15 C17 72.6(4) . . . . ?
 C11 C6 C7 C8 -2.5(4) . . . . ?
 C11 C6 C7 C12 175.7(2) . . . . ?
 C12 C7 C8 C9 -177.0(3) . . . . ?
 C18A N2A C3 C2 162.5(8) . . . . ?
 C18A N2A C3 C5 -14.4(15) . . . . ?
 C18A C19A C20A C21A -1.6(9) . . . . ?
 C18A C19A C24A C25A 140.9(5) . . . . ?
 C18A C19A C24A C26A -92.8(7) . . . . ?
 C18A C23A C27A C28A -130.5(8) . . . . ?
 C18A C23A C27A C29A 106.2(9) . . . . ?
 C19A C18A C23A C22A -0.9(10) . . . . ?
 C19A C18A C23A C27A -178.1(7) . . . . ?
 C19A C20A C21A C22A -0.6(10) . . . . ?
 C20A C19A C24A C25A -38.5(7) . . . . ?
 C20A C19A C24A C26A 87.8(7) . . . . ?
 C20A C21A C22A C23A 2.1(10) . . . . ?
 C21A C22A C23A C18A -1.3(10) . . . . ?
 C21A C22A C23A C27A 175.9(7) . . . . ?
 C22A C23A C27A C28A 52.4(9) . . . . ?
 C22A C23A C27A C29A -71.0(11) . . . . ?
 C23A C18A C19A C20A 2.4(9) . . . . ?
 C23A C18A C19A C24A -177.1(6) . . . . ?
 C24A C19A C20A C21A 177.9(5) . . . . ?
 C30 N3 C35 C36 -99.2(3) . . . . ?
 C30 N3 C35 C40 85.1(3) . . . . ?
 C30 C31 C32 N4 11.2(4) . . . . ?
 C30 C31 C32 C34 -168.6(3) . . . . ?
 C32 N4 C47 C48 94.2(3) . . . . ?
 C32 N4 C47 C52 -89.8(3) . . . . ?
 C33 C30 C31 C32 169.4(3) . . . . ?
 C35 N3 C30 C31 170.1(2) . . . . ?
 C35 N3 C30 C33 -9.3(3) . . . . ?
 C35 C36 C37 C38 0.0(4) . . . . ?
 C35 C36 C41 C42 -147.1(2) . . . . ?
 C35 C36 C41 C43 88.2(3) . . . . ?
 C35 C40 C44 C45 116.0(3) . . . . ?
 C35 C40 C44 C46 -121.6(2) . . . . ?
 C36 C35 C40 C39 0.1(3) . . . . ?
 C36 C35 C40 C44 179.8(2) . . . . ?
 C36 C37 C38 C39 -0.8(4) . . . . ?
 C37 C36 C41 C42 35.4(3) . . . . ?
 C37 C36 C41 C43 -89.3(3) . . . . ?
 C37 C38 C39 C40 1.2(4) . . . . ?
 C38 C39 C40 C35 -0.9(4) . . . . ?
 C38 C39 C40 C44 179.4(2) . . . . ?
 C39 C40 C44 C45 -64.3(3) . . . . ?
 C39 C40 C44 C46 58.1(3) . . . . ?
 C40 C35 C36 C37 0.3(3) . . . . ?
 C40 C35 C36 C41 -177.2(2) . . . . ?
 C41 C36 C37 C38 177.5(2) . . . . ?
 C47 N4 C32 C31 -172.4(2) . . . . ?
 C47 N4 C32 C34 7.4(4) . . . . ?
 C47 C48 C49 C50 -1.2(5) . . . . ?
 C47 C48 C53 C54 137.4(3) . . . . ?
 C47 C48 C53 C55 -98.7(3) . . . . ?
 C47 C52 C56 C57 -126.7(3) . . . . ?
 C47 C52 C56 C58 110.8(3) . . . . ?
 C48 C47 C52 C51 -3.3(4) . . . . ?
 C48 C47 C52 C56 177.1(3) . . . . ?
 C48 C49 C50 C51 -1.0(6) . . . . ?
 C49 C48 C53 C54 -44.2(4) . . . . ?
 C49 C48 C53 C55 79.8(4) . . . . ?
 C49 C50 C51 C52 1.2(6) . . . . ?
 C50 C51 C52 C47 0.9(5) . . . . ?
 C50 C51 C52 C56 -179.5(3) . . . . ?
 C51 C52 C56 C57 53.7(4) . . . . ?
 C51 C52 C56 C58 -68.8(4) . . . . ?
 C52 C47 C48 C49 3.4(4) . . . . ?
 C52 C47 C48 C53 -178.1(2) . . . . ?
 C53 C48 C49 C50 -179.7(3) . . . . ?
 N2B C18B C19B C20B 174.7(19) . . . . ?
 N2B C18B C19B C24B 1(2) . . . . ?
 N2B C18B C23B C22B -175.5(19) . . . . ?
 N2B C18B C23B C27B 4(3) . . . . ?
 C18B C19B C20B C21B 0.3(19) . . . . ?
 C18B C19B C24B C25B 136.2(13) . . . . ?
 C18B C19B C24B C26B -97.4(16) . . . . ?
 C18B C23B C27B C28B -119(2) . . . . ?
 C18B C23B C27B C29B 111(2) . . . . ?
 C19B C18B C23B C22B 2(2) . . . . ?
 C19B C18B C23B C27B -178.2(17) . . . . ?
 C19B C20B C21B C22B 3(2) . . . . ?
 C20B C19B C24B C25B -36.9(17) . . . . ?
 C20B C19B C24B C26B 89.6(16) . . . . ?
 C20B C21B C22B C23B -4(2) . . . . ?
 C21B C22B C23B C18B 1(2) . . . . ?
 C21B C22B C23B C27B -178.7(16) . . . . ?
 C22B C23B C27B C28B 61(2) . . . . ?
 C22B C23B C27B C29B -69(2) . . . . ?
 C23B C18B C19B C20B -3(2) . . . . ?
 C23B C18B C19B C24B -176.1(14) . . . . ?
 C24B C19B C20B C21B 173.7(12) . . . . ?

_shelx_res_file
;
    jjw0661_sq.res created by SHELXL-2014/7

TITL jjw0661_a.res in C2/c
REM Old TITL jjw0661 in C2/c #15
REM SHELXT solution in C2/c
REM R1 0.178, Rweak 0.010, Alpha 0.062, Orientation as input
REM Formula found by SHELXT: C127 N28 Cl10 Ga4
CELL 1.54184 18.344584 18.101186 43.773904 90 92.7471 90
ZERR 8 0.00019 0.000182 0.000384 0 0.0008 0
LATT 7
SYMM -X,+Y,0.5-Z
SFAC C H Ga N P
UNIT 464 656 16 32 32
SIMU 0.01 0.02 2 N2A C18A > C29A N2B > C22B C23B > C29B

L.S. 20 0 200
PLAN  20
TEMP -173.14(10)
BOND $H
MORE -1
CONF
ABIN
fmap 2
acta
REM <olex2.extras>
REM <HklSrc "%.\\jjw0661_sq.hkl">
REM </olex2.extras>

WGHT    0.047100   33.764404
FVAR       0.09657   0.69280
GA1   3    0.720248    0.559397    0.324895    11.00000    0.02962    0.02646 =
         0.02299    0.00289   -0.00032    0.00192
GA2   3    0.747618    0.536894    0.425706    11.00000    0.01850    0.02041 =
         0.02211   -0.00118   -0.00184   -0.00142
P1    5    0.736836    0.466308    0.380376    11.00000    0.02560    0.02248 =
         0.02267   -0.00088   -0.00292   -0.00221
P2    5    0.648104    0.550531    0.368753    11.00000    0.02226    0.03507 =
         0.02657    0.00113   -0.00235    0.00272
P3    5    0.811782    0.556997    0.365038    11.00000    0.02449    0.02589 =
         0.02665   -0.00166    0.00063   -0.00315
P4    5    0.731908    0.632332    0.387860    11.00000    0.03528    0.02124 =
         0.02980   -0.00040    0.00182    0.00119
N1    4    0.714255    0.479390    0.294629    11.00000    0.03675    0.03492 =
         0.02435   -0.00121   -0.00288   -0.00199
PART 1
N2A   4    0.718414    0.644063    0.294760    21.00000    0.05164    0.02477 =
         0.02834    0.01330    0.01027    0.00328
PART 0
N3    4    0.681170    0.516926    0.458443    11.00000    0.02112    0.02401 =
         0.02397   -0.00136   -0.00160   -0.00294
N4    4    0.837759    0.533279    0.451964    11.00000    0.02067    0.03055 =
         0.02665   -0.00350   -0.00381   -0.00195
C1    1    0.699526    0.491063    0.264889    11.00000    0.03940    0.05524 =
         0.02457   -0.00337   -0.00217   -0.00435
C2    1    0.689187    0.561836    0.252026    11.00000    0.04701    0.06629 =
         0.02375    0.00913   -0.00193    0.00616
AFIX  43
H2    2    0.671737    0.562611    0.231241    11.00000   -1.20000
AFIX   0
C3    1    0.700831    0.630350    0.265354    11.00000    0.05141    0.05503 =
         0.03080    0.01513    0.00499    0.01560
C4    1    0.695182    0.426983    0.242951    11.00000    0.06158    0.06915 =
         0.02848   -0.01169   -0.00404   -0.01272
AFIX 137
H4A   2    0.736489    0.428999    0.229585    11.00000   -1.50000
H4B   2    0.649390    0.429697    0.230519    11.00000   -1.50000
H4C   2    0.696839    0.380541    0.254470    11.00000   -1.50000
AFIX   0
C5    1    0.696745    0.696618    0.244048    11.00000    0.08554    0.06835 =
         0.04021    0.02690    0.00698    0.02028
AFIX 137
H5A   2    0.649799    0.696418    0.232380    11.00000   -1.50000
H5B   2    0.736526    0.694031    0.229922    11.00000   -1.50000
H5C   2    0.701273    0.742157    0.256098    11.00000   -1.50000
AFIX   0
C6    1    0.728737    0.405953    0.306245    11.00000    0.05231    0.03144 =
         0.02568   -0.00943   -0.00228   -0.00199
C7    1    0.670177    0.363739    0.316688    11.00000    0.06016    0.03644 =
         0.03115   -0.00634   -0.00744   -0.01281
C8    1    0.686035    0.293976    0.328701    11.00000    0.07321    0.03570 =
         0.04338   -0.00740   -0.00208   -0.01279
AFIX  43
H8    2    0.647588    0.263915    0.335510    11.00000   -1.20000
AFIX   0
C9    1    0.756094    0.268171    0.330830    11.00000    0.09032    0.02927 =
         0.04882   -0.00822    0.00643   -0.00281
AFIX  43
H9    2    0.765647    0.220225    0.338890    11.00000   -1.20000
AFIX   0
C10   1    0.813332    0.311036    0.321387    11.00000    0.07046    0.03973 =
         0.05635   -0.01058    0.00519    0.01794
AFIX  43
H10   2    0.861812    0.292641    0.323508    11.00000   -1.20000
AFIX   0
C11   1    0.800602    0.381136    0.308755    11.00000    0.05728    0.03481 =
         0.04375   -0.00884    0.00864    0.00565
C12   1    0.591451    0.392122    0.316177    11.00000    0.04328    0.05147 =
         0.04604   -0.00028   -0.00733   -0.01740
AFIX  13
H12   2    0.593030    0.446886    0.313275    11.00000   -1.20000
AFIX   0
C13   1    0.554458    0.377276    0.345788    11.00000    0.05552    0.06849 =
         0.04892   -0.00462   -0.00260   -0.01736
AFIX 137
H13A  2    0.505806    0.399760    0.344814    11.00000   -1.50000
H13B  2    0.583690    0.398623    0.362915    11.00000   -1.50000
H13C  2    0.549961    0.323845    0.348781    11.00000   -1.50000
AFIX   0
C14   1    0.545502    0.359787    0.289455    11.00000    0.05300    0.11296 =
         0.04362   -0.00487   -0.00578   -0.03299
AFIX 137
H14A  2    0.563480    0.378270    0.270165    11.00000   -1.50000
H14B  2    0.494447    0.374543    0.291120    11.00000   -1.50000
H14C  2    0.549060    0.305775    0.289912    11.00000   -1.50000
AFIX   0
C15   1    0.864173    0.426197    0.298345    11.00000    0.04697    0.04409 =
         0.08284    0.00225    0.01564    0.01515
AFIX  13
H15   2    0.846175    0.477287    0.293647    11.00000   -1.20000
AFIX   0
C16   1    0.926339    0.431896    0.322908    11.00000    0.05519    0.05527 =
         0.09955   -0.02243    0.01339    0.00835
AFIX 137
H16A  2    0.906790    0.448766    0.342152    11.00000   -1.50000
H16B  2    0.962859    0.467253    0.316310    11.00000   -1.50000
H16C  2    0.949109    0.383314    0.325966    11.00000   -1.50000
AFIX   0
C17   1    0.892624    0.392977    0.268715    11.00000    0.05218    0.09484 =
         0.07629    0.00642    0.01916    0.00684
AFIX 137
H17A  2    0.910263    0.342642    0.272738    11.00000   -1.50000
H17B  2    0.932690    0.423439    0.261694    11.00000   -1.50000
H17C  2    0.852988    0.391752    0.252896    11.00000   -1.50000
AFIX   0
PART 1
C18A  1    0.749341    0.712621    0.307377    21.00000    0.07269    0.02440 =
         0.03591    0.00571    0.01135   -0.00314
C19A  1    0.703015    0.762461    0.321180    21.00000    0.07721    0.03241 =
         0.03882    0.00510   -0.00263    0.01134
C20A  1    0.733629    0.827307    0.333187    21.00000    0.09664    0.03215 =
         0.05374   -0.00485    0.00707    0.00232
AFIX  43
H20A  2    0.703280    0.862847    0.342253    21.00000   -1.20000
AFIX   0
C21A  1    0.808242    0.840609    0.332047    21.00000    0.10473    0.03468 =
         0.06516   -0.00646    0.01146   -0.01895
AFIX  43
H21A  2    0.828441    0.885222    0.340146    21.00000   -1.20000
AFIX   0
C22A  1    0.852812    0.789005    0.319159    21.00000    0.08602    0.04437 =
         0.07216   -0.00379    0.02435   -0.02437
AFIX  43
H22A  2    0.903886    0.797589    0.319034    21.00000   -1.20000
AFIX   0
C23A  1    0.823661    0.724595    0.306360    21.00000    0.07499    0.03684 =
         0.06080   -0.00440    0.03019   -0.02375
C24A  1    0.621080    0.748190    0.323787    21.00000    0.07427    0.05109 =
         0.05444   -0.00207   -0.00907    0.02641
AFIX  13
H24A  2    0.614462    0.693388    0.322848    21.00000   -1.20000
AFIX   0
C25A  1    0.592072    0.772734    0.353726    21.00000    0.07935    0.06308 =
         0.05604    0.01424    0.00125    0.02231
AFIX 137
H25A  2    0.594330    0.826726    0.355129    21.00000   -1.50000
H25B  2    0.621677    0.750968    0.370650    21.00000   -1.50000
H25C  2    0.541322    0.756490    0.354895    21.00000   -1.50000
AFIX   0
C26A  1    0.573218    0.780243    0.297472    21.00000    0.09377    0.14887 =
         0.05140    0.01007    0.00873    0.05981
AFIX 137
H26A  2    0.583615    0.833058    0.295379    21.00000   -1.50000
H26B  2    0.521688    0.773491    0.301742    21.00000   -1.50000
H26C  2    0.583671    0.754727    0.278428    21.00000   -1.50000
AFIX   0
C27A  1    0.872446    0.671495    0.290578    21.00000    0.06693    0.05217 =
         0.08982   -0.02129    0.03854   -0.02446
AFIX  13
H27A  2    0.843977    0.625293    0.286152    21.00000   -1.20000
AFIX   0
C28A  1    0.941231    0.650356    0.311785    21.00000    0.10318    0.05284 =
         0.11622    0.01414    0.06180   -0.00865
AFIX 137
H28A  2    0.972059    0.694078    0.315199    21.00000   -1.50000
H28B  2    0.969166    0.611735    0.301886    21.00000   -1.50000
H28C  2    0.925201    0.632121    0.331447    21.00000   -1.50000
AFIX   0
C29A  1    0.896325    0.701250    0.260980    21.00000    0.06311    0.11963 =
         0.07652   -0.03169    0.01691   -0.03222
AFIX 137
H29A  2    0.853508    0.709871    0.247187    21.00000   -1.50000
H29B  2    0.928753    0.665566    0.251670    21.00000   -1.50000
H29C  2    0.922437    0.747904    0.264593    21.00000   -1.50000
AFIX   0
PART 0
C30   1    0.701207    0.524649    0.487890    11.00000    0.03110    0.02466 =
         0.02558   -0.00246    0.00170   -0.00225
C31   1    0.772819    0.539020    0.498489    11.00000    0.03012    0.04141 =
         0.02263   -0.00453   -0.00443   -0.00244
AFIX  43
H31   2    0.778951    0.551379    0.519547    11.00000   -1.20000
AFIX   0
C32   1    0.836853    0.537692    0.482289    11.00000    0.02762    0.03906 =
         0.02829   -0.00439   -0.00726   -0.00301
C33   1    0.644966    0.517002    0.511831    11.00000    0.03361    0.04157 =
         0.02609   -0.00256    0.00402   -0.00506
AFIX 137
H33A  2    0.624780    0.565725    0.516313    11.00000   -1.50000
H33B  2    0.668015    0.496032    0.530541    11.00000   -1.50000
H33C  2    0.605645    0.484292    0.504160    11.00000   -1.50000
AFIX   0
C34   1    0.907443    0.541313    0.501375    11.00000    0.03045    0.07314 =
         0.03337   -0.00863   -0.01087   -0.00034
AFIX 137
H34A  2    0.948596    0.542384    0.487910    11.00000   -1.50000
H34B  2    0.911551    0.497791    0.514662    11.00000   -1.50000
H34C  2    0.908041    0.586117    0.513953    11.00000   -1.50000
AFIX   0
C35   1    0.609480    0.490760    0.448696    11.00000    0.02178    0.02945 =
         0.02423   -0.00134    0.00164   -0.00525
C36   1    0.601768    0.415688    0.440501    11.00000    0.02928    0.02982 =
         0.02953   -0.00230    0.00492   -0.00833
C37   1    0.533928    0.391888    0.428985    11.00000    0.03162    0.04008 =
         0.04227   -0.01181    0.00576   -0.01469
AFIX  43
H37   2    0.527592    0.341541    0.423332    11.00000   -1.20000
AFIX   0
C38   1    0.475358    0.439805    0.425555    11.00000    0.02344    0.05731 =
         0.04681   -0.01460    0.00086   -0.01144
AFIX  43
H38   2    0.429582    0.422454    0.417400    11.00000   -1.20000
AFIX   0
C39   1    0.483604    0.512733    0.433996    11.00000    0.02222    0.05257 =
         0.03864   -0.00572    0.00126    0.00114
AFIX  43
H39   2    0.442866    0.545058    0.431939    11.00000   -1.20000
AFIX   0
C40   1    0.550631    0.540231    0.445529    11.00000    0.02218    0.03548 =
         0.02852   -0.00194    0.00231    0.00000
C41   1    0.664387    0.361095    0.445215    11.00000    0.03219    0.02327 =
         0.04281   -0.00226    0.00509   -0.00558
AFIX  13
H41   2    0.710862    0.389538    0.443894    11.00000   -1.20000
AFIX   0
C42   1    0.664716    0.300366    0.420918    11.00000    0.05442    0.02854 =
         0.04652   -0.00296    0.01138   -0.00208
AFIX 137
H42A  2    0.621095    0.269552    0.422374    11.00000   -1.50000
H42B  2    0.708432    0.269747    0.424253    11.00000   -1.50000
H42C  2    0.664833    0.322896    0.400564    11.00000   -1.50000
AFIX   0
C43   1    0.664359    0.327048    0.477222    11.00000    0.05349    0.03510 =
         0.04244   -0.00056   -0.00234    0.00260
AFIX 137
H43A  2    0.667155    0.366433    0.492595    11.00000   -1.50000
H43B  2    0.706553    0.294202    0.480254    11.00000   -1.50000
H43C  2    0.619350    0.298711    0.479309    11.00000   -1.50000
AFIX   0
C44   1    0.557208    0.621196    0.454220    11.00000    0.02610    0.03244 =
         0.04425   -0.00174    0.00564    0.00369
AFIX  13
H44   2    0.607798    0.630081    0.462976    11.00000   -1.20000
AFIX   0
C45   1    0.544844    0.670746    0.426219    11.00000    0.06159    0.04419 =
         0.05510    0.01193    0.02019    0.02085
AFIX 137
H45A  2    0.578410    0.656380    0.410507    11.00000   -1.50000
H45B  2    0.553785    0.722332    0.432070    11.00000   -1.50000
H45C  2    0.494402    0.665328    0.418109    11.00000   -1.50000
AFIX   0
C46   1    0.503182    0.642277    0.478500    11.00000    0.03726    0.04189 =
         0.04502   -0.00972    0.00754    0.00359
AFIX 137
H46A  2    0.453140    0.636129    0.470014    11.00000   -1.50000
H46B  2    0.511008    0.693894    0.484564    11.00000   -1.50000
H46C  2    0.510922    0.610260    0.496416    11.00000   -1.50000
AFIX   0
C47   1    0.905369    0.523054    0.436739    11.00000    0.01638    0.04197 =
         0.03244   -0.00720   -0.00421   -0.00053
C48   1    0.926328    0.450748    0.429401    11.00000    0.02521    0.04209 =
         0.04245   -0.00050   -0.00322    0.00525
C49   1    0.991080    0.441466    0.414526    11.00000    0.03423    0.05409 =
         0.07063   -0.01083    0.01193    0.00995
AFIX  43
H49   2    1.006860    0.393049    0.409693    11.00000   -1.20000
AFIX   0
C50   1    1.032600    0.501198    0.406705    11.00000    0.03328    0.07468 =
         0.09043   -0.01956    0.02390   -0.00355
AFIX  43
H50   2    1.077057    0.493797    0.396859    11.00000   -1.20000
AFIX   0
C51   1    1.009828    0.571518    0.413121    11.00000    0.03258    0.06189 =
         0.07477   -0.01667    0.01708   -0.01517
AFIX  43
H51   2    1.038533    0.612340    0.407243    11.00000   -1.20000
AFIX   0
C52   1    0.945626    0.584490    0.428047    11.00000    0.02606    0.04992 =
         0.04750   -0.01349    0.00186   -0.01050
C53   1    0.882962    0.383812    0.437611    11.00000    0.03396    0.03613 =
         0.05897    0.00571    0.00459    0.01345
AFIX  13
H53   2    0.832572    0.400676    0.441921    11.00000   -1.20000
AFIX   0
C54   1    0.876395    0.327267    0.411570    11.00000    0.04971    0.03924 =
         0.07070   -0.00191   -0.00791    0.00795
AFIX 137
H54A  2    0.856180    0.351359    0.392988    11.00000   -1.50000
H54B  2    0.844032    0.287015    0.417295    11.00000   -1.50000
H54C  2    0.924772    0.307268    0.407773    11.00000   -1.50000
AFIX   0
C55   1    0.915733    0.347555    0.466703    11.00000    0.09913    0.05477 =
         0.05849    0.01287    0.00218    0.01790
AFIX 137
H55A  2    0.887744    0.303126    0.471279    11.00000   -1.50000
H55B  2    0.913859    0.382344    0.483802    11.00000   -1.50000
H55C  2    0.966589    0.333971    0.463666    11.00000   -1.50000
AFIX   0
C56   1    0.923019    0.663699    0.434242    11.00000    0.03603    0.04246 =
         0.06735   -0.02119    0.01285   -0.01967
AFIX  13
H56   2    0.873268    0.662713    0.442625    11.00000   -1.20000
AFIX   0
C57   1    0.919566    0.711372    0.405554    11.00000    0.05123    0.04264 =
         0.07525   -0.01254   -0.00097   -0.02022
AFIX 137
H57A  2    0.968382    0.715212    0.397527    11.00000   -1.50000
H57B  2    0.901906    0.760791    0.410579    11.00000   -1.50000
H57C  2    0.886188    0.688798    0.390089    11.00000   -1.50000
AFIX   0
C58   1    0.975624    0.699412    0.458309    11.00000    0.08194    0.06505 =
         0.05750   -0.02076    0.01356   -0.03884
AFIX 137
H58A  2    0.976456    0.670123    0.477152    11.00000   -1.50000
H58B  2    0.959175    0.749697    0.462609    11.00000   -1.50000
H58C  2    1.024790    0.701192    0.450515    11.00000   -1.50000
AFIX   0

PART 2
N2B   4    0.710301    0.630937    0.296495   -21.00000    0.06112    0.02014 =
         0.03299    0.01130    0.00966    0.00489

C18B  1    0.723567    0.705717    0.305367   -21.00000    0.06610    0.02620 =
         0.03849    0.01487    0.01288   -0.00095
C19B  1    0.664116    0.749867    0.315921   -21.00000    0.07177    0.03917 =
         0.04237    0.00978    0.01969    0.00488
C20B  1    0.681887    0.818589    0.326433   -21.00000    0.09260    0.04126 =
         0.05550    0.00301    0.01159    0.00343
AFIX  43
H20B  2    0.644683    0.849554    0.333717   -21.00000   -1.20000
AFIX   0

C21B  1    0.754888    0.845121    0.326763   -21.00000    0.09272    0.03548 =
         0.05517    0.00364    0.01520   -0.01512
AFIX  43
H21B  2    0.766042    0.892520    0.335052   -21.00000   -1.20000
AFIX   0

C22B  1    0.808733    0.803541    0.315385   -21.00000    0.08857    0.03482 =
         0.06132    0.00276    0.01638   -0.01710
AFIX  43
H22B  2    0.856653    0.823177    0.314705   -21.00000   -1.20000
AFIX   0

C23B  1    0.794106    0.730619    0.304431   -21.00000    0.07407    0.03593 =
         0.05445    0.00503    0.01721   -0.01042
C24B  1    0.588492    0.718053    0.318342   -21.00000    0.07070    0.05451 =
         0.05340    0.01227    0.01514    0.02765
AFIX  13
H24B  2    0.594528    0.663161    0.318977   -21.00000   -1.20000
AFIX   0

C25B  1    0.552594    0.739560    0.348028   -21.00000    0.07883    0.07577 =
         0.06058    0.01705    0.01605    0.02427
AFIX 137
H25D  2    0.550062    0.793508    0.349534   -21.00000   -1.50000
H25E  2    0.581606    0.719979    0.365586   -21.00000   -1.50000
H25F  2    0.503193    0.718924    0.347917   -21.00000   -1.50000
AFIX   0

C26B  1    0.534632    0.734727    0.290701   -21.00000    0.09349    0.11633 =
         0.06546    0.01570    0.00078    0.04086
AFIX 137
H26D  2    0.507329    0.689834    0.285057   -21.00000   -1.50000
H26E  2    0.562077    0.751305    0.273301   -21.00000   -1.50000
H26F  2    0.500537    0.773554    0.296321   -21.00000   -1.50000
AFIX   0

C27B  1    0.856566    0.691720    0.293558   -21.00000    0.07305    0.04649 =
         0.08115    0.00352    0.02213   -0.02475
AFIX  13
H27B  2    0.837154    0.641833    0.287665   -21.00000   -1.20000
AFIX   0

C28B  1    0.920104    0.676064    0.314171   -21.00000    0.09099    0.07411 =
         0.09154    0.03848    0.02080   -0.00918
AFIX 137
H28D  2    0.909084    0.634345    0.327452   -21.00000   -1.50000
H28E  2    0.931640    0.719709    0.326738   -21.00000   -1.50000
H28F  2    0.962031    0.663678    0.302092   -21.00000   -1.50000
AFIX   0

C29B  1    0.886627    0.724779    0.262211   -21.00000    0.07512    0.05196 =
         0.07619    0.01380    0.00796   -0.02806
AFIX 137
H29D  2    0.845532    0.733461    0.247514   -21.00000   -1.50000
H29E  2    0.920473    0.689417    0.253581   -21.00000   -1.50000
H29F  2    0.912084    0.771484    0.266550   -21.00000   -1.50000
AFIX   0
HKLF 4

REM  jjw0661_a.res in C2/c
REM R1 =  0.0463 for   14348 Fo > 4sig(Fo)  and  0.0487 for all   15110 data
REM    755 parameters refined using    396 restraints

END

WGHT      0.0470     33.7473

REM Highest difference peak  0.787,  deepest hole -0.431,  1-sigma level  0.065
Q1    1   0.4945  0.6821  0.2789  11.00000  0.05    0.79
Q2    1   0.9136  0.4452  0.2720  11.00000  0.05    0.66
Q3    1   0.7319  0.5839  0.4308  11.00000  0.05    0.60
Q4    1   0.6089  0.8283  0.2947  11.00000  0.05    0.59
Q5    1   0.7368  0.6258  0.4169  11.00000  0.05    0.55
Q6    1   0.8864  0.4590  0.3064  11.00000  0.05    0.54
Q7    1   0.7380  0.5186  0.3183  11.00000  0.05    0.52
Q8    1   0.6210  0.3643  0.3068  11.00000  0.05    0.49
Q9    1   0.8381  0.4010  0.3111  11.00000  0.05    0.49
Q10   1   0.8875  0.6412  0.3034  11.00000  0.05    0.47
Q11   1   0.5857  0.3155  0.2820  11.00000  0.05    0.47
Q12   1   0.9116  0.6466  0.2676  11.00000  0.05    0.47
Q13   1   0.7050  0.3577  0.3072  11.00000  0.05    0.41
Q14   1   0.9590  0.4645  0.3285  11.00000  0.05    0.39
Q15   1   0.8083  0.5416  0.4442  11.00000  0.05    0.38
Q16   1   0.7705  0.5841  0.4278  11.00000  0.05    0.38
Q17   1   0.8782  0.3240  0.4625  11.00000  0.05    0.37
Q18   1   0.8559  0.3356  0.3232  11.00000  0.05    0.37
Q19   1   0.6757  0.5618  0.3186  11.00000  0.05    0.37
Q20   1   0.7675  0.5168  0.3719  11.00000  0.05    0.36
;
_shelx_res_checksum               90183
_shelx_hkl_file
;
   0   0   3    0.08    0.09
   0   0  -3    0.24    0.11
   0   0   4  465.60    5.01
   0   0  -4  516.28    5.05
   0   0  -4  535.33    6.40
   0   0   5    0.31    0.16
   0   0  -5    0.04    0.10
   0   0  -5    0.33    0.23
   0   0   6    3.45    0.54
   0   0   6    4.10    0.55
   0   0  -6    1.73    0.51
   0   0  -6    1.91    0.39
   0   0   7    1.09    0.32
   0   0  -7    0.90    0.38
   0   0  -7    0.21    0.18
   0   0   7    0.38    0.28
   0   0  -8 9999.00   37.09
   0   0  -8 9786.80   29.43
   0   0   9    0.52    0.33
   0   0  -9    0.52    0.23
   0   0   9    0.18    0.40
   0   0  -9    0.16    0.20
   0   0  10   27.40    1.89
   0   0 -10   13.14    1.21
   0   0  10   24.19    1.62
   0   0 -10   14.19    1.55
   0   0 -11    0.47    0.42
   0   0  11    0.10    0.21
   0   0 -11    0.32    0.26
   0   0  11    0.44    0.32
   0   0 -12 4033.20   22.45
   0   0 -12 4083.19   28.04
   0   0 -13    0.30    0.23
   0   0  13    0.32    0.26
   0   0 -13    0.84    0.38
   0   0  13    0.28    0.23
   0   0  14   99.39    3.71
   0   0 -14  103.94    3.85
   0   0  14  117.77    4.53
   0   0 -14  102.22    5.17
   0   0 -14  111.99    4.93
   0   0  15    0.52    0.45
   0   0  15    0.54    0.32
   0   0 -15    0.26    0.22
   0   0  15    0.42    0.32
   0   0 -15    0.48    0.45
   0   0 -15    0.16    0.31
   0   0 -16 3195.28   30.89
   0   0 -16 3165.89   22.14
   0   0 -16 3141.45   27.63
   0   0  17    0.83    0.41
   0   0  17    0.89    0.37
   0   0 -17    0.41    0.31
   0   0 -17    1.29    0.59
   0   0  17    0.48    0.62
   0   0 -17    0.53    0.36
   0   0 -18  215.16    8.47
   0   0  18  190.13    6.52
   0   0  18  161.96    7.54
   0   0 -18  213.61    7.60
   0   0  18  147.19    4.81
   0   0 -18  213.63    6.00
   0   0  19    0.82    0.61
   0   0 -19   -0.33    0.53
   0   0 -19    0.64    0.78
   0   0 -19    0.74    0.40
   0   0  19    0.33    0.28
   0   0  19    0.39    0.36
   0   0 -20 1226.87   21.05
   0   0 -20 1205.61   14.88
   0   0  20 1177.91   17.10
   0   0 -20 1212.00   18.82
   0   0 -21    0.07    0.42
   0   0 -21    0.31    0.46
   0   0  21    0.66    0.39
   0   0  21    0.39    0.32
   0   0 -21    0.08    0.37
   0   0  22    0.81    0.63
   0   0 -22    0.34    0.58
   0   0 -22    0.86    0.39
   0   0 -22    1.27    0.74
   0   0  22    0.59    0.62
   0   0  23    1.46    1.02
   0   0  23   -0.01    0.31
   0   0 -23    0.39    0.45
   0   0  23    0.73    0.48
   0   0 -23    0.06    0.28
   0   0 -23    0.26    0.52
   0   0  24  184.62   11.60
   0   0 -24  170.98    6.02
   0   0  24  183.81    7.34
   0   0 -24  164.59    7.58
   0   0 -24  169.71    8.56
   0   0  24  150.43    8.61
   0   0 -25    0.77    0.64
   0   0  25    0.68    0.82
   0   0 -25    0.21    0.53
   0   0  25    0.43    0.50
   0   0 -25    0.20    0.30
   0   0  25    0.73    0.82
   0   0  26   25.51    4.51
   0   0  26   21.01    3.38
   0   0 -26   15.19    2.38
   0   0  26   24.59    2.82
   0   0 -26   14.93    2.60
   0   0 -27    0.27    0.42
   0   0 -27   -0.04    0.29
   0   0  27   -1.16    1.32
   0   0  28  478.31   16.68
   0   0 -28  453.28   13.42
   0   0 -28  465.61   15.40
   0   0  29    0.33    1.03
   0   0 -29    0.64    0.53
   0   0  29    0.06    0.73
   0   0 -29   -1.29    0.87
   0   0 -30    5.56    1.81
   0   0  30    7.35    2.12
   0   0  30    4.66    2.38
   0   0 -30   11.97    2.23
   0   0 -31    0.94    1.00
   0   0  31    0.32    0.98
   0   0  31   -0.16    0.68
   0   0 -31    0.22    0.39
   0   0  32  478.34   10.23
   0   0 -32  457.32   14.70
   0   0 -32  482.08   17.09
   0   0 -33    0.82    0.69
   0   0  33    0.94    0.38
   0   0  33    0.60    0.47
   0   0  33   -0.17    1.12
   0   0  33    1.00    0.73
   0   0 -33    0.70    0.57
   0   0 -34    0.41    0.30
   0   0  34    3.22    1.77
   0   0  34    2.09    0.70
   0   0 -34    0.79    0.99
   0   0  34    1.02    0.55
   0   0  34    1.59    0.76
   0   0  35    0.33    0.70
   0   0 -35    0.20    0.74
   0   0  35    0.45    0.45
   0   0 -35   -0.40    0.62
   0   0  35    0.83    0.77
   0   0  35    0.54    0.80
   0   0  36  167.77    5.68
   0   0  36  159.47    5.85
   0   0  36  162.26    6.23
   0   0 -36  141.11    8.79
   0   0 -36  155.59   10.32
   0   0  37    0.15    0.69
   0   0  37    0.97    0.53
   0   0 -37   -0.38    0.79
   0   0  37    1.05    0.64
   0   0  37    0.12    0.40
   0   0 -37    0.13    0.46
   0   0 -38    0.83    0.93
   0   0 -38   -0.06    0.96
   0   0  38    0.98    0.59
   0   0  38    1.65    0.63
   0   0  38    1.06    0.59
   0   0  38    1.29    1.20
   0   0  39   -0.41    0.28
   0   0  39    0.00    0.51
   0   0  40  139.13    5.95
   0   0  40  151.91    5.41
   0   0  40  141.97    5.49
   0   0  41    0.60    0.76
   0   0  41    0.36    0.46
   0   0  41    0.61    0.49
   0   0  42    2.16    0.72
   0   0  42    1.92    0.77
   0   0  42    2.72    0.84
   0   0  43   -0.10    0.38
   0   0  43    0.00    0.30
   0   0  43    0.14    0.31
   0   0  44   21.82    2.00
   0   0  44   22.64    2.03
   0   0  44   24.32    2.43
   0   0  45    0.01    0.48
   0   0  45    0.13    0.29
   0   0  46   15.12    1.86
   0   0  46   17.40    1.68
   0   0  47   -0.03    0.41
   0   0  47    0.13    0.28
   0   0  48  202.38    5.13
   0   0  48  208.63    6.26
   0   0  49    0.74    0.35
   0   0  49    0.48    0.38
   0   0  50   11.18    1.39
   0   0  50   11.51    1.11
   0   0  51    1.19    0.55
   0   0  51    0.09    0.24
   0   0  52  205.61    5.07
   0   0  53    1.17    0.45
   0   0  54   11.39    1.04
   0   0  55    0.02    0.13
   0  -2   0 7570.74   23.02
   0  -2   0 7725.43   22.77
   0  -2  -1 1146.56    9.60
   0   2  -1 1211.26   10.20
   0  -2  -1 1097.78    8.42
   0   2   1 1172.07    9.26
   0   2   2  440.84    5.92
   0  -2  -2  428.20    5.80
   0  -2   2  412.19    5.75
   0  -2  -2  424.09    4.29
   0  -2  -2  447.99    5.25
   0  -2   3   92.89    2.67
   0  -2   3   91.93    2.93
   0  -2  -3  143.69    3.11
   0   2  -3   89.81    1.71
   0  -2  -3  150.56    3.75
   0  -2   3   96.06    3.02
   0   2   4  621.22    7.93
   0   2  -4  585.05    3.70
   0  -2  -4  630.77    8.38
   0  -2   4  586.51    7.96
   0  -2  -4  580.30    7.24
   0  -2   4  579.13    6.89
   0  -2   5  136.74    4.12
   0  -2   5  143.64    3.63
   0  -2   5  143.93    4.19
   0  -2  -5  104.89    3.43
   0   2   5  102.84    3.53
   0  -2  -5  121.23    3.97
   0  -2  -5  116.39    3.87
   0  -2  -6  570.49    8.72
   0  -2   6  562.32    8.84
   0  -2   6  590.90    7.73
   0  -2  -6  628.38    9.33
   0  -2  -6  629.71    9.51
   0   2   6  578.29    7.75
   0   2   6  626.13    9.31
   0  -2   6  632.80    9.52
   0  -2  -7   66.07    3.27
   0  -2   7   69.03    2.82
   0   2   7   64.92    3.20
   0  -2   7   76.09    3.56
   0   2   7   70.80    2.83
   0  -2  -7   66.94    3.23
   0   2  -7   61.43    2.35
   0  -2  -7   63.89    3.09
   0   2  -7   60.41    2.95
   0   2  -7   63.74    1.77
   0  -2   7   66.81    3.22
   0  -2   8    2.18    0.78
   0   2  -8    1.08    0.49
   0   2  -8    1.29    0.41
   0  -2  -8    2.48    0.77
   0   2  -8    2.64    0.41
   0  -2  -8    1.37    0.66
   0  -2   8    1.93    0.73
   0  -2   8    1.62    0.52
   0  -2   8    2.69    0.80
   0   2   8    0.88    0.35
   0   2   8    1.72    0.50
   0  -2  -9 1433.64   15.70
   0   2   9 1405.68   13.37
   0  -2   9 1554.67   18.49
   0  -2   9 1364.86   17.06
   0  -2   9 1379.24   15.98
   0   2  -9 1367.08   15.58
   0   2  -9 1436.28   13.03
   0   2  -9 1399.20    8.81
   0  -2   9 1427.86   14.53
   0   2   9 1471.87   17.46
   0  -2  -9 1331.44   15.73
   0  -2 -10  140.79    5.39
   0  -2  10  126.66    5.05
   0   2  10  121.40    4.07
   0   2 -10  143.78    4.37
   0  -2  10  135.91    5.88
   0  -2  10  126.60    4.65
   0   2 -10  143.04    5.36
   0   2 -10  145.50    3.02
   0  -2  10  119.55    5.34
   0  -2 -10  141.25    5.09
   0   2 -11    9.55    1.22
   0  -2 -11    7.43    1.33
   0   2 -11    7.57    1.32
   0  -2  11   20.88    2.12
   0   2  11   19.36    1.72
   0  -2  11   18.83    0.98
   0  -2  11   21.35    2.48
   0  -2  11   19.38    2.29
   0   2  11   17.02    1.34
   0  -2  11   20.79    2.01
   0   2 -11    9.18    0.82
   0  -2 -11    7.64    1.26
   0  -2  12    1.31    0.31
   0  -2 -12   11.51    1.69
   0  -2 -12   10.16    1.48
   0  -2  12    0.52    0.47
   0   2  12    0.79    0.37
   0   2 -12    8.48    1.21
   0  -2  12    0.78    0.53
   0   2 -12    8.73    0.83
   0   2 -12   11.35    1.66
   0   2  12    1.72    0.62
   0  -2  12    1.95    0.73
   0  -2  12    1.37    0.76
   0  -2  13  291.17    9.52
   0   2 -13  363.31    9.43
   0  -2 -13  378.99    9.96
   0   2 -13  337.98    7.84
   0  -2  13  309.06    8.60
   0  -2 -13  360.07    8.48
   0   2 -13  345.45    5.45
   0  -2 -13  342.01    9.33
   0  -2  13  326.02   10.68
   0   2  13  300.62    7.17
   0   2  13  306.41    6.06
   0  -2  14  774.28   13.93
   0  -2 -14  944.31   15.95
   0  -2 -14  957.87   14.09
   0  -2  14  795.25   17.76
   0  -2  14  715.66   15.39
   0   2 -14  907.84   13.28
   0   2 -14  941.55    9.27
   0   2 -14  971.40   15.97
   0  -2 -14  973.17   16.28
   0  -2  15   10.53    2.34
   0   2 -15   25.88    1.59
   0  -2  15    7.21    1.48
   0  -2  15    8.87    0.97
   0   2 -15   29.41    2.92
   0   2  15    9.15    1.43
   0  -2 -15   26.30    2.46
   0   2 -15   21.72    2.16
   0   2  15    7.60    1.07
   0  -2 -15   25.42    2.79
   0  -2 -15   25.26    2.76
   0  -2  15    9.72    1.99
   0  -2 -16 1000.97   17.39
   0  -2  16  801.19   14.93
   0  -2 -16 1025.61   15.04
   0  -2 -16  991.36   16.97
   0   2 -16  966.25   14.60
   0   2 -16 1022.44   10.30
   0  -2  16  742.48   16.70
   0   2 -16 1052.00   17.65
   0  -2  16  846.54   20.03
   0   2  16  832.59   11.07
   0  -2  17    6.39    1.66
   0   2  17    5.67    0.94
   0   2 -17   17.36    2.37
   0  -2  17    7.87    2.10
   0  -2  17    6.17    0.88
   0   2 -17   17.27    1.39
   0  -2 -17   17.26    2.39
   0  -2 -17   18.76    2.41
   0   2  17    7.75    1.32
   0   2 -17   15.29    1.88
   0  -2 -17   17.62    2.03
   0  -2  17    5.98    1.36
   0  -2  18   41.65    4.78
   0  -2 -18   29.83    3.07
   0  -2 -18   29.20    2.63
   0  -2  18   37.51    4.00
   0   2 -18   29.50    3.10
   0  -2  18   39.09    3.44
   0  -2 -18   27.62    3.10
   0  -2  18   35.64    2.16
   0   2  18   35.56    2.78
   0   2 -18   31.47    1.91
   0   2  18   40.05    2.54
   0   2 -18   28.10    2.67
   0  -2 -19    2.13    0.86
   0  -2 -19    1.10    0.96
   0  -2 -19    1.05    0.57
   0  -2  19    4.01    1.54
   0  -2  19    4.36    0.76
   0  -2  19    5.11    1.65
   0   2  19    4.51    1.09
   0   2 -19    2.63    0.94
   0   2 -19    2.31    0.91
   0   2  19    4.94    0.93
   0   2 -19    1.83    0.50
   0  -2  19    4.21    1.14
   0   2 -20  292.29    6.09
   0  -2  20  274.19   13.18
   0   2 -20  284.70   10.19
   0   2  20  240.33    7.28
   0   2 -20  266.37    8.50
   0  -2  20  261.77    9.28
   0  -2  20  234.77   10.64
   0  -2 -20  283.05    9.77
   0   2  20  230.02    8.78
   0  -2 -20  273.73    8.20
   0  -2 -20  271.50   10.02
   0   2  20  269.75    6.95
   0  -2 -21  101.87    5.09
   0   2  21  116.62    4.70
   0   2 -21  108.54    6.49
   0  -2 -21  102.70    6.02
   0   2 -21  110.87    3.83
   0  -2  21  100.60    7.16
   0  -2  21  114.12    8.80
   0   2  21  102.76    6.07
   0   2  21  101.28    4.76
   0  -2 -21   99.59    6.26
   0   2 -21  100.48    5.38
   0  -2  21  113.60    6.25
   0  -2 -22    3.09    0.95
   0   2  22    1.43    0.81
   0   2 -22    1.90    0.98
   0   2  22    2.63    0.79
   0  -2 -22    3.42    1.17
   0  -2  22    1.04    0.42
   0  -2 -22    3.92    1.19
   0  -2  22    2.83    1.79
   0   2 -22    2.53    0.90
   0  -2  22    2.51    0.84
   0   2 -23   30.07    3.09
   0   2 -23   30.07    3.56
   0  -2 -23   29.10    2.82
   0  -2 -23   29.82    3.39
   0   2  23   34.84    3.64
   0  -2 -23   29.38    3.49
   0  -2  23   40.34    3.84
   0  -2  23   32.41    4.21
   0  -2  23   37.53    5.36
   0  -2  24  241.90   13.61
   0  -2 -24  204.74    8.96
   0  -2  24  200.51   10.95
   0  -2  24  237.31    9.46
   0  -2 -24  212.53    9.59
   0  -2 -24  201.42    7.45
   0   2 -24  206.42    8.17
   0   2  24  198.46    8.91
   0   2 -24  219.58    9.73
   0  -2  25    8.29    2.62
   0  -2 -25    5.08    1.24
   0  -2 -25    4.27    1.31
   0  -2  25    7.36    1.76
   0   2 -25    6.37    1.70
   0   2 -25    6.64    1.55
   0  -2 -25    6.72    1.77
   0   2  25    6.00    1.69
   0  -2  25    6.04    1.99
   0  -2 -26    8.39    1.91
   0  -2  26   12.26    2.85
   0  -2  26   13.58    2.39
   0   2 -26    8.75    1.76
   0  -2 -26    8.26    1.98
   0   2  26   10.05    2.09
   0  -2 -26    8.04    1.64
   0   2 -26    7.38    1.93
   0  -2  26   13.32    3.43
   0   2  27   48.85    4.77
   0   2 -27   68.15    5.86
   0  -2 -27   70.59    5.58
   0  -2 -27   68.81    5.82
   0  -2 -27   65.40    4.44
   0  -2  27   57.86    4.91
   0   2 -27   66.00    4.90
   0  -2  27   49.95    5.78
   0  -2  27   62.16    7.44
   0  -2 -28   80.12    6.41
   0   2 -28   81.45    6.48
   0  -2  28   83.85    8.80
   0  -2  28   83.87    6.03
   0   2 -28   78.04    5.40
   0  -2  28   73.96    7.26
   0  -2 -28   76.62    5.91
   0   2 -29  152.94    7.75
   0  -2  29  184.91    9.07
   0  -2 -29  158.44    9.24
   0   2 -29  165.26    9.46
   0  -2 -29  153.49    8.61
   0  -2  29  191.76   13.67
   0  -2  29  165.10   10.94
   0  -2  30   24.41    4.27
   0   2 -30   22.53    3.00
   0  -2  30   28.13    5.24
   0   2 -30   22.16    3.61
   0  -2 -30   24.92    3.74
   0  -2 -30   22.83    3.40
   0  -2  31  340.51   18.70
   0  -2  31  284.30   14.86
   0  -2 -31  311.73   13.41
   0   2 -31  291.61   11.04
   0   2  31  353.19   17.84
   0  -2 -31  302.69   12.40
   0   2 -31  312.71   13.47
   0  -2 -32   82.51    6.98
   0   2  32   75.35    3.90
   0   2  32   80.06    8.65
   0   2 -32   87.73    7.36
   0   2  32   76.67    4.04
   0  -2  32   72.32    7.65
   0  -2  32   81.36    9.29
   0  -2 -32   80.84    6.50
   0   2 -32   80.89    5.92
   0  -2  32   80.28    4.32
   0  -2  32   73.41    3.78
   0   2 -33   14.77    3.13
   0  -2 -33   13.63    2.76
   0   2  33   14.30    1.61
   0  -2 -33   12.44    2.81
   0  -2  33   11.60    1.52
   0  -2 -33   17.57    1.72
   0  -2  33   11.28    3.01
   0   2  33   15.36    2.09
   0  -2  33   15.86    4.19
   0  -2  33   13.58    1.86
   0   2 -33   13.03    2.47
   0   2  33   15.64    4.03
   0   2  33   13.81    1.76
   0   2  33   13.34    1.87
   0   2  34   64.93    3.34
   0  -2  34   62.52    3.62
   0  -2 -34   65.05    3.36
   0   2 -34   57.00    5.19
   0   2 -34   61.91    6.40
   0  -2  34   67.02    7.46
   0  -2  34   70.51    8.90
   0   2  34   60.37    3.76
   0  -2  34   61.83    3.94
   0  -2 -34   56.56    6.03
   0   2  34   59.14    3.58
   0   2  34   56.67    3.96
   0  -2 -34   49.22    5.28
   0   2  34   76.69    8.74
   0  -2 -35   31.21    4.27
   0   2  35   35.23    2.76
   0   2  35   34.03    2.84
   0   2 -35   33.02    4.02
   0  -2  35   37.10    2.78
   0   2  35   40.14    6.30
   0  -2 -35   38.83    2.62
   0   2 -35   31.79    4.60
   0   2  35   38.14    2.57
   0  -2  35   35.07    2.98
   0  -2 -35   34.41    4.72
   0  -2  35   41.66    7.12
   0   2  35   32.67    3.06
   0   2  36  103.93    4.98
   0  -2  36  110.58   11.58
   0   2  36  100.16    4.65
   0   2  36   98.88    5.25
   0   2 -36   94.19    8.12
   0  -2  36  102.74    5.07
   0  -2  36  102.49    4.59
   0  -2 -36   83.49    7.12
   0  -2 -36   92.99    7.94
   0   2  36  117.87   11.02
   0  -2 -36  114.10    4.49
   0   2 -36   91.12    6.81
   0   2  36  106.14    4.33
   0   2  37   18.14    2.09
   0   2  37   19.03    2.06
   0   2 -37   18.82    3.72
   0  -2  37   19.13    2.19
   0  -2 -37   23.12    2.03
   0  -2 -37   17.97    3.27
   0   2  37   20.08    4.56
   0   2  37   18.10    1.80
   0   2  37   16.78    2.22
   0   2 -37   18.83    3.13
   0  -2  37   25.53    5.64
   0  -2  37   17.77    1.92
   0  -2 -37   18.00    3.48
   0   2  38    5.30    1.12
   0  -2  38    5.39    1.19
   0   2  38    6.08    1.29
   0  -2  38    6.74    2.88
   0   2 -38    3.99    1.36
   0   2 -38    5.55    2.08
   0  -2  38    5.35    1.11
   0  -2 -38    2.69    1.25
   0   2  38    5.53    1.30
   0  -2 -38    4.93    0.98
   0   2  38    5.94    1.04
   0   2  38    7.21    3.27
   0  -2 -38    5.60    2.12
   0   2  39    4.33    1.06
   0   2  39    4.05    1.12
   0   2  39    3.30    0.74
   0   2  39    3.62    0.94
   0  -2 -39    5.39    0.99
   0  -2  39    5.31    1.30
   0  -2  39    2.78    0.72
   0  -2  40   98.51    5.04
   0  -2  40   99.55    4.58
   0   2  40  106.93    4.35
   0   2  40   95.21    5.09
   0   2  40   95.72    4.56
   0   2  40   94.73    4.82
   0  -2  41   11.70    1.57
   0   2  41   10.22    1.53
   0   2  41   12.17    1.50
   0   2  41    9.80    1.64
   0  -2  41   10.57    1.66
   0   2  41   11.99    1.75
   0   2  42    2.83    0.81
   0  -2  42    2.96    0.83
   0   2  42    1.47    0.70
   0   2  42    1.89    0.73
   0  -2  42    2.67    0.75
   0   2  42    2.40    0.89
   0   2  43   59.97    3.12
   0   2  43   59.62    3.77
   0   2  43   53.18    3.27
   0  -2  43   57.42    3.36
   0   2  43   55.30    3.63
   0  -2  43   56.57    3.76
   0  -2  44    4.35    1.11
   0   2  44    4.17    0.99
   0   2  44    3.41    0.96
   0   2  44    3.94    0.91
   0   2  44    4.21    0.87
   0  -2  44    3.15    0.76
   0   2  45    0.30    0.35
   0  -2  45    2.69    0.79
   0  -2  45    1.76    0.77
   0   2  45    2.14    0.77
   0   2  45    2.08    0.79
   0   2  45    2.37    0.65
   0   2  46    3.61    0.84
   0   2  46    3.50    0.82
   0  -2  46    2.83    0.92
   0   2  46    3.38    0.91
   0  -2  46    3.61    0.80
   0  -2  47  143.52    4.69
   0  -2  47  136.49    5.19
   0   2  47  133.34    4.53
   0   2  47  143.62    5.34
   0  -2  48  123.78    4.79
   0   2  48  121.25    4.09
   0   2  48  128.89    4.90
   0  -2  48  124.47    4.21
   0  -2  49    3.70    0.78
   0   2  49    3.60    0.74
   0  -2  49    4.98    0.98
   0   2  49    3.71    0.91
   0  -2  50    4.46    0.77
   0   2  50    3.85    0.87
   0  -2  50    4.06    0.85
   0   2  50    4.12    0.68
   0   2  51   56.83    2.81
   0  -2  51   54.38    2.33
   0  -2  51   53.64    2.71
   0   2  52   47.95    2.43
   0  -2  52   43.13    1.91
   0  -2  52   46.16    2.37
   0  -2  53    3.36    0.50
   0   2  53    3.61    0.67
   0  -2  53    3.98    0.66
   0   2  54    1.01    0.34
   0  -2  54    0.86    0.29
   0   4   0    5.21    0.99
   0  -4   0    7.47    1.03
   0  -4   0    4.49    0.81
   0   4   1 1700.29   15.76
   0  -4   1 1640.06   15.76
   0  -4   1 1634.05   15.35
   0   4  -1 1703.20   16.62
   0  -4   1 1562.69   14.92
   0  -4  -1 1580.79   14.26
   0  -4  -1 1656.73   14.43
   0  -4  -2   84.43    3.48
   0  -4  -2  118.98    3.81
   0   4  -2   84.63    3.88
   0   4   2   81.08    3.46
   0  -4   2  102.91    3.78
   0  -4   2  115.99    4.19
   0  -4   2  111.63    4.26
   0  -4   3 1260.57   13.28
   0  -4  -3 1414.56   14.81
   0  -4  -3 1446.76   16.14
   0  -4   3 1349.09   14.61
   0   4  -3 1465.19   16.59
   0   4   3 1450.64   14.73
   0  -4  -3 1479.87   13.47
   0  -4   3 1350.61   15.37
   0   4  -3 1423.63    8.18
   0  -4  -3 1408.92    8.58
   0  -4  -4  333.14    7.52
   0   4  -4  340.14    8.38
   0  -4  -4  341.80    5.18
   0   4  -4  351.75    4.99
   0  -4   4  359.68    7.13
   0   4   4  333.78    7.18
   0  -4  -5  983.35   10.03
   0   4  -5 1021.49    9.82
   0  -4  -5  997.35   13.59
   0   4   5 1025.51   12.85
   0  -4   5  966.06   13.41
   0  -4   6  714.37   12.00
   0  -4  -6  747.03    9.68
   0  -4  -6  741.09   12.30
   0   4   6  770.06   11.37
   0  -4   6  690.71   11.79
   0   4  -6  761.61    9.46
   0  -4   6  680.80   10.14
   0  -4  -7 2641.69   19.71
   0  -4  -7 2672.27   24.62
   0   4   7 2720.83   22.15
   0   4  -7 2745.64   19.47
   0  -4  -8  133.52    4.80
   0   4  -8  138.85    4.74
   0  -4   8  162.62    6.23
   0   4   8  151.72    5.26
   0  -4  -8  141.28    5.87
   0   4   8  126.55    5.07
   0  -4   8  156.62    5.08
   0  -4  -9    1.46    0.57
   0  -4   9    7.25    1.40
   0  -4   9    6.17    1.26
   0  -4  -9    2.10    0.84
   0   4   9    6.21    1.10
   0  -4  -9    1.48    0.61
   0  -4   9    6.60    1.09
   0  -4   9    6.57    1.35
   0   4  -9    2.43    0.66
   0   4   9    2.66    0.84
   0   4  10   56.10    3.65
   0  -4 -10   65.41    4.38
   0  -4  10   91.31    4.15
   0  -4  10   87.34    4.99
   0  -4  10   92.77    5.16
   0   4  10   85.82    4.10
   0   4 -10   61.36    3.53
   0  -4 -10   60.58    3.65
   0  -4 -10   63.18    4.08
   0  -4  10   89.57    5.14
   0   4  11 1270.48   16.07
   0  -4  11 1293.73   20.37
   0  -4 -11 1460.47   19.93
   0  -4 -11 1396.76   18.16
   0   4 -11 1398.88   10.18
   0   4 -11 1411.33   17.41
   0   4  11 1410.78   18.87
   0  -4  11 1336.59   16.06
   0  -4  11 1303.65   19.71
   0  -4 -11 1473.30   21.00
   0   4 -11 1375.22   13.95
   0  -4  11 1420.84   21.07
   0   4 -12  240.75    7.50
   0   4  12  216.29    6.67
   0   4  12  240.28    8.15
   0  -4  12  219.72    8.40
   0  -4  12  226.43    6.84
   0  -4  12  220.20    8.82
   0   4 -12  238.94    6.04
   0  -4 -12  243.52    8.33
   0  -4  12  242.29    9.08
   0   4 -12  241.20    4.18
   0  -4 -12  231.68    7.63
   0  -4 -12  239.61    8.75
   0  -4 -13   82.99    4.75
   0  -4  13   70.39    4.88
   0  -4  13   72.55    4.09
   0   4 -13   82.36    2.37
   0   4 -13   85.45    4.65
   0  -4  13   68.95    5.17
   0   4  13   90.49    5.21
   0  -4 -13   86.58    5.01
   0   4  13   67.02    3.78
   0   4 -13   81.89    3.72
   0  -4  13   79.39    5.47
   0  -4 -13   93.78    5.60
   0  -4  14   36.80    3.02
   0  -4 -14   41.25    3.49
   0   4 -14   40.45    3.28
   0   4 -14   42.17    1.70
   0  -4  14   34.23    3.84
   0   4 -14   40.61    2.74
   0   4  14   34.43    2.77
   0  -4  14   35.84    3.62
   0  -4 -14   42.53    3.84
   0  -4  14   38.90    3.98
   0  -4 -14   40.50    3.43
   0   4  15  103.84    3.41
   0  -4 -15   90.21    5.17
   0  -4 -15   86.28    5.12
   0   4 -15   84.80    4.95
   0  -4 -15   93.84    5.94
   0  -4  15  111.72    7.11
   0   4  15   98.73    4.76
   0  -4  15  108.92    6.34
   0   4 -15   90.44    2.52
   0   4 -15   91.80    4.29
   0  -4  15  117.83    5.60
   0  -4  15  109.41    6.94
   0   4 -16  324.85    9.89
   0  -4  16  360.54   11.74
   0  -4 -16  341.55   11.41
   0  -4  16  357.67   10.06
   0  -4  16  339.67   12.76
   0   4  16  324.21    8.83
   0   4  16  355.78    6.45
   0  -4  16  359.22   13.31
   0   4 -16  313.39    8.21
   0  -4 -16  309.67    9.67
   0   4 -16  312.33    4.73
   0  -4 -16  291.96    9.66
   0  -4 -17  282.50   10.69
   0  -4 -17  280.96    9.27
   0   4 -17  289.95    9.60
   0  -4  17  267.04   11.87
   0   4  17  265.98    5.68
   0   4 -17  271.49    7.85
   0  -4 -17  273.75    9.52
   0  -4  17  264.06   10.15
   0  -4  17  268.16    9.06
   0  -4  17  247.09   11.17
   0   4  17  233.61    7.61
   0  -4  18   69.94    6.40
   0   4 -18   56.14    3.74
   0  -4  18   70.75    5.37
   0  -4 -18   55.64    4.19
   0  -4  18   71.32    6.24
   0   4  18   66.06    4.15
   0  -4 -18   61.16    5.02
   0  -4  18   76.15    5.09
   0  -4 -18   56.29    4.45
   0   4  18   77.72    3.10
   0   4 -18   56.85    4.40
   0  -4 -19  669.44   15.56
   0  -4 -19  687.07   17.05
   0  -4  19  654.38   19.16
   0  -4 -19  688.75   14.88
   0   4  19  633.92   13.07
   0  -4  19  719.31   17.36
   0   4 -19  693.80   13.21
   0   4 -19  733.67   16.09
   0  -4  19  698.29   20.77
   0  -4 -20   22.71    3.25
   0  -4 -20   21.97    2.69
   0   4  20   14.51    2.01
   0  -4 -20   21.57    2.89
   0   4 -20   24.89    3.08
   0  -4  20   16.98    3.56
   0  -4  20   14.51    2.62
   0   4 -20   22.39    2.43
   0  -4  20   17.00    3.31
   0  -4  21 1120.59   26.49
   0  -4  21 1224.36   23.45
   0   4  21 1101.93   17.69
   0  -4 -21 1196.73   21.78
   0   4 -21 1227.52   18.38
   0  -4 -21 1183.85   19.82
   0  -4  21 1213.98   29.50
   0   4 -21 1292.62   22.40
   0  -4 -21 1204.12   23.42
   0   4  22   36.10    3.25
   0  -4  22   38.62    5.51
   0  -4 -22   38.37    4.20
   0  -4 -22   41.14    4.18
   0   4 -22   42.90    3.52
   0   4 -22   45.93    4.32
   0  -4  22   40.86    4.46
   0  -4  22   37.10    4.96
   0  -4 -22   41.74    3.78
   0   4 -23    2.61    1.27
   0  -4  23    1.16    1.32
   0  -4  23    1.43    0.80
   0  -4  23    4.48    1.83
   0  -4 -23    2.65    1.23
   0   4 -23    2.60    1.01
   0  -4 -23    3.08    1.24
   0  -4 -23    3.34    1.24
   0  -4 -24  259.08   10.80
   0   4 -24  281.73   11.19
   0  -4  24  258.90   13.69
   0  -4 -24  244.55    9.30
   0  -4  24  283.99   11.83
   0  -4 -24  249.73   10.93
   0  -4  24  274.79   15.29
   0   4 -24  268.14    9.17
   0  -4  25  449.50   18.39
   0   4 -25  463.94   12.30
   0  -4 -25  437.32   14.26
   0   4 -25  477.54   14.86
   0  -4 -25  441.40   14.92
   0  -4  25  495.38   21.10
   0  -4  25  492.51   15.88
   0  -4 -26   42.23    4.54
   0  -4 -26   42.87    4.84
   0  -4  26   64.63    5.86
   0  -4  26   63.13    7.14
   0  -4  26   63.87    7.74
   0   4 -26   44.73    3.93
   0   4 -26   46.25    4.77
   0  -4 -27  533.55   16.84
   0  -4  27  577.70   23.79
   0  -4 -27  571.27   16.95
   0  -4  27  588.49   17.80
   0   4 -27  605.93   17.51
   0   4 -27  574.81   14.29
   0  -4  27  528.99   20.87
   0  -4 -28    3.63    1.44
   0  -4  28    2.68    1.37
   0  -4  28    1.78    0.92
   0  -4 -28    3.11    1.33
   0   4 -28    3.57    1.32
   0   4 -28    3.01    1.08
   0  -4  28    1.46    1.14
   0  -4  29  175.41   13.70
   0   4 -29  185.16   10.18
   0  -4  29  178.51   10.03
   0  -4 -29  177.08    9.85
   0  -4 -29  171.44    9.83
   0  -4  29  165.30   12.09
   0   4 -29  167.74    7.96
   0  -4 -30    5.33    1.82
   0  -4  30    8.71    2.92
   0   4 -30    6.78    1.98
   0   4 -30    7.00    1.69
   0  -4 -30    5.43    1.81
   0  -4  30    9.51    3.32
   0  -4  30    8.21    2.29
   0   4 -31  304.80   13.55
   0   4 -31  276.35   10.58
   0  -4 -31  283.63   12.99
   0  -4  31  270.75    8.18
   0  -4 -31  318.86    7.38
   0  -4  31  264.65    6.58
   0  -4 -31  258.82   12.40
   0   4  31  273.41    7.44
   0  -4  31  258.20   15.58
   0   4  31  269.36    7.46
   0  -4  31  306.69   18.91
   0   4  31  293.40    8.65
   0  -4  31  261.82    7.51
   0  -4  31  291.40   13.08
   0   4  32   38.74    2.58
   0  -4  32   36.78    3.07
   0   4  32   36.85    2.85
   0  -4  32   38.18    2.89
   0  -4 -32   37.63    2.59
   0  -4 -32   34.12    4.54
   0   4  32   37.74    2.80
   0   4 -32   34.83    3.84
   0   4  32   36.41    3.10
   0  -4 -32   32.73    4.44
   0  -4  32   40.02    6.24
   0   4 -32   37.66    4.83
   0  -4  32   37.19    2.52
   0  -4  32   41.84    5.05
   0  -4  32   47.54    7.57
   0   4 -33   19.70    2.97
   0   4  33   18.82    1.81
   0  -4 -33   17.60    3.44
   0  -4  33   19.32    2.11
   0  -4 -33   19.63    1.93
   0   4  33   20.91    2.13
   0   4 -33   18.98    3.51
   0   4  33   19.70    2.34
   0   4  33   19.73    2.15
   0  -4  33   20.15    1.88
   0  -4 -33   19.82    3.48
   0  -4  33   18.63    2.29
   0  -4  33   21.98    5.11
   0  -4  33   23.88    4.89
   0  -4  34   33.69    2.96
   0  -4  34   31.72    5.63
   0   4  34   38.13    2.86
   0  -4  34   39.65    7.05
   0   4  34   41.50    3.32
   0  -4 -34   39.65    5.08
   0  -4 -34   46.56    2.93
   0   4 -34   43.50    5.35
   0  -4 -34   37.72    4.97
   0   4  34   37.00    2.92
   0   4 -34   38.49    4.15
   0  -4  34   36.58    2.89
   0   4  35   89.43    9.47
   0  -4  35   87.31    4.75
   0   4  35   86.99    4.88
   0  -4  35   87.12    9.57
   0   4  35   82.29    4.25
   0  -4 -35   95.26    4.21
   0  -4  35   81.38    4.35
   0   4  35   85.88    4.48
   0   4 -35   86.15    7.71
   0  -4 -35   79.93    7.21
   0  -4 -35   72.13    6.92
   0  -4  35   86.97   10.61
   0   4  36   65.75    3.82
   0  -4  36   70.52    4.34
   0  -4 -36   80.32    3.90
   0  -4 -36   69.21    6.85
   0   4  36   68.05    4.38
   0   4  36   68.09    4.03
   0  -4  36   69.03    9.35
   0  -4  36   66.98    3.94
   0   4 -36   73.87    7.22
   0  -4 -36   63.66    6.46
   0   4  36   74.05    8.63
   0  -4  36   69.34    8.50
   0   4  37  112.77   10.61
   0   4  37  112.90    5.58
   0  -4 -37  135.96    5.08
   0   4  37  111.96    5.16
   0   4  37  107.95    4.90
   0  -4  37  112.69    5.06
   0  -4  37  120.92   12.56
   0  -4 -37  103.79    8.38
   0  -4 -37  112.87    8.77
   0  -4  37  110.07    5.41
   0   4 -37  115.82    9.13
   0   4  38    4.18    1.07
   0  -4  38    4.45    1.05
   0  -4 -38    3.80    0.92
   0   4  38    4.44    1.03
   0   4  38    3.41    1.05
   0  -4  38    4.20    1.09
   0  -4 -39   11.52    1.48
   0   4  39   10.63    1.73
   0  -4  39    9.22    1.48
   0   4  39   10.01    1.62
   0   4  39    8.00    1.37
   0  -4  39    8.07    1.48
   0  -4 -40  110.20    4.53
   0  -4  40  100.68    4.76
   0   4  40  102.54    4.99
   0   4  40   99.57    5.18
   0  -4  40  100.36    5.12
   0   4  40   98.01    4.65
   0   4  41  171.25    6.05
   0  -4  41  169.52    6.10
   0   4  41  161.65    6.46
   0  -4  41  171.94    6.67
   0  -4 -41  188.30    5.85
   0   4  41  182.91    6.56
   0   4  42   26.76    2.55
   0  -4  42   26.02    2.55
   0   4  42   29.23    2.54
   0  -4  42   30.25    2.54
   0   4  42   23.85    2.53
   0  -4 -42   26.01    2.20
   0   4  43   15.34    1.76
   0   4  43   15.15    1.87
   0  -4  43   16.49    1.96
   0  -4 -43   20.27    1.88
   0   4  43   15.96    1.94
   0  -4  43   15.89    1.83
   0   4  44   10.74    1.58
   0  -4  44   11.68    1.66
   0  -4  44   10.06    1.40
   0   4  44    9.88    1.53
   0   4  44   10.88    1.47
   0  -4 -44   10.71    1.36
   0  -4  45    7.20    1.29
   0  -4 -45    5.17    0.90
   0   4  45    8.26    1.30
   0   4  45    6.01    1.18
   0  -4  45    9.58    1.41
   0   4  45    8.28    1.39
   0  -4  46   20.62    1.89
   0  -4  46   18.78    1.97
   0  -4 -46   21.45    1.76
   0   4  46   20.65    2.06
   0   4  46   20.51    1.88
   0   4  46   17.55    1.85
   0  -4 -47  106.41    3.68
   0  -4  47   97.47    3.93
   0  -4  47   96.15    4.24
   0   4  47   96.77    3.87
   0   4  47  101.28    4.31
   0   4  47   90.08    3.96
   0   4  48    4.60    0.88
   0   4  48    5.69    0.97
   0  -4  48    4.94    0.91
   0   4  48    6.49    1.06
   0  -4  48    6.36    1.09
   0  -4  49   16.89    1.64
   0  -4  49   16.85    1.51
   0   4  49   16.99    1.50
   0   4  49   17.76    1.71
   0   4  49   16.71    1.48
   0   4  50    8.48    1.13
   0  -4  50    8.84    1.14
   0   4  50    9.03    1.03
   0  -4  50    8.72    1.03
   0   4  51  125.98    3.97
   0   4  51  121.64    3.32
   0  -4  51  115.35    3.67
   0  -4  51  124.14    3.58
   0  -4  52    1.06    0.33
   0  -4  52    0.64    0.29
   0   4  52    0.69    0.28
   0   4  52    0.70    0.23
   0  -4  53    8.91    0.79
   0   4  53    8.64    0.90
   0  -6   0    9.76    1.58
   0  -6   0    9.79    1.50
   0  -6  -1 1007.67   14.09
   0  -6   1  991.35   14.53
   0  -6   1  958.40   14.66
   0   6   1  865.36   14.21
   0   6  -1  866.43   14.69
   0  -6   2  751.61   12.79
   0   6   2  657.20   12.28
   0   6  -2  660.32   13.08
   0  -6   2  764.99   13.72
   0  -6  -2  626.95   11.53
   0  -6  -2  803.40   12.44
   0  -6   2  793.20   13.38
   0   6   3    8.72    1.50
   0  -6  -3    6.06    1.28
   0  -6   3    5.62    1.12
   0  -6   3    4.79    1.19
   0  -6   3    5.58    1.28
   0   6  -3    7.85    1.58
   0  -6  -3    5.40    1.11
   0  -6   3    4.45    1.31
   0   6  -4  311.93    9.61
   0  -6   4  367.85   10.14
   0  -6   4  351.94    9.95
   0  -6   4  390.11   10.08
   0   6   4  308.74    8.44
   0  -6  -4  300.84    8.68
   0  -6   4  343.14    8.53
   0  -6   5   80.19    4.91
   0  -6  -5   64.50    4.18
   0  -6   5   75.24    4.55
   0   6  -5   64.72    1.95
   0  -6   5   64.52    4.31
   0  -6   5   65.82    3.75
   0  -6  -5   55.18    2.01
   0   6   5   66.33    3.92
   0   6  -5   67.46    4.64
   0   6  -6  411.17    5.92
   0   6  -6  383.51   11.23
   0  -6   6  413.42    9.41
   0  -6  -6  357.14    6.14
   0  -6  -6  375.65   10.27
   0  -6   6  410.34   11.02
   0   6   6  380.42    9.41
   0  -6   6  426.46   11.54
   0  -6   6  457.56   11.58
   0   6  -7  744.95    9.00
   0   6  -7  690.38   15.52
   0  -6   7  615.35   11.55
   0  -6  -7  658.17    9.50
   0  -6   7  680.78   14.54
   0  -6   7  639.23   14.07
   0  -6  -7  663.89   14.10
   0  -6   7  633.43   14.36
   0   6   7  687.30   12.75
   0   6   8   12.43    1.86
   0  -6   8   37.50    3.55
   0   6  -8   15.29    2.47
   0  -6   8   36.62    2.89
   0  -6  -8   16.37    1.66
   0  -6   8   36.21    3.58
   0  -6  -8   15.83    2.32
   0  -6   8   34.66    3.37
   0   6  -8   17.98    1.56
   0  -6   9  127.04    6.81
   0  -6  -9  141.67    5.22
   0  -6   9  125.01    5.38
   0  -6   9  135.33    6.91
   0   6  -9  151.83    4.86
   0   6   9  147.51    6.18
   0   6   9  123.47    5.77
   0  -6  -9  142.70    7.04
   0  -6   9  129.92    6.71
   0  -6  10   10.49    2.09
   0   6  10    8.13    1.53
   0   6 -10    7.54    1.17
   0  -6  10    8.12    1.95
   0  -6  10    8.91    1.47
   0   6  10    8.82    1.64
   0  -6 -10    7.83    1.30
   0  -6  10    9.24    2.04
   0  -6 -10    9.92    1.97
   0  -6 -10    8.20    1.84
   0   6  11 1606.48   21.25
   0   6 -11 1721.98   18.57
   0   6  11 1569.09   20.94
   0  -6  11 1588.16   19.63
   0  -6 -11 1651.07   24.71
   0  -6 -11 1602.68   19.72
   0  -6  11 1676.70   26.06
   0  -6  11 1608.57   25.60
   0  -6  11 1669.07   25.41
   0  -6 -11 1628.89   24.99
   0  -6  12  369.89   12.42
   0  -6  12  352.71    9.35
   0  -6 -12  341.21    9.53
   0   6  12  337.84    9.86
   0  -6 -12  356.57   12.16
   0   6 -12  358.55    8.95
   0  -6 -12  355.71   11.55
   0  -6  12  370.33   12.86
   0  -6  12  357.24   12.41
   0   6  12  324.48    9.92
   0   6 -13  102.51    3.28
   0  -6 -13   93.27    6.08
   0  -6  13  124.92    7.46
   0   6  13   85.43    5.31
   0  -6  13  127.01    7.81
   0  -6 -13   91.43    5.15
   0  -6 -13  100.77    6.68
   0   6 -13  102.97    4.33
   0  -6  13  132.30    7.73
   0   6  13  116.82    5.84
   0   6 -13  100.51    5.01
   0  -6  13  119.39    5.64
   0   6  14   41.01    3.53
   0   6 -14   40.18    3.30
   0   6 -14   36.56    2.67
   0  -6 -14   36.20    4.13
   0  -6 -14   33.98    3.26
   0  -6 -14   36.92    3.86
   0  -6  14   42.55    4.72
   0   6  14   32.30    3.35
   0  -6  14   43.44    3.45
   0  -6  14   45.35    4.69
   0  -6  14   42.15    4.49
   0  -6  15    7.82    2.13
   0  -6  15    8.74    2.05
   0   6  15    7.70    1.56
   0  -6  15    9.46    1.69
   0   6 -15    5.83    1.14
   0  -6  15    8.56    2.17
   0   6 -15    5.10    1.24
   0  -6 -15    4.80    1.45
   0  -6 -15    4.36    1.20
   0  -6 -15    6.04    1.66
   0   6  15    3.33    1.07
   0  -6  16  121.19    6.09
   0  -6  16  125.50    8.02
   0  -6  16  119.80    8.40
   0  -6 -16  139.94    7.04
   0  -6 -16  140.65    8.42
   0  -6  16  125.99    8.37
   0   6 -16  148.08    6.74
   0   6  16  114.83    5.94
   0   6 -16  140.02    5.54
   0  -6 -16  131.54    7.33
   0  -6  17  950.32   22.28
   0  -6  17  930.00   23.42
   0  -6  17  909.79   23.89
   0   6 -17 1015.62   15.39
   0  -6  17  902.29   17.19
   0  -6 -17 1011.01   22.74
   0   6  17  828.85   16.08
   0  -6 -17  957.90   19.63
   0   6 -17 1024.36   18.11
   0  -6 -17  935.78   18.57
   0  -6  18   64.24    5.95
   0  -6 -18   48.47    4.37
   0  -6  18   64.03    4.73
   0   6 -18   58.34    3.83
   0  -6  18   60.11    6.23
   0  -6 -18   56.90    5.61
   0  -6  18   59.47    6.27
   0   6  18   55.71    4.21
   0  -6 -18   52.04    4.70
   0   6 -18   59.41    4.49
   0  -6  19    6.96    2.15
   0  -6 -19    1.55    0.95
   0   6  19    6.56    1.58
   0  -6 -19    1.48    1.00
   0  -6  19    5.50    1.91
   0   6 -19    1.85    0.87
   0  -6  19    6.14    2.04
   0   6 -19    2.17    0.84
   0  -6  19    6.15    1.52
   0   6  20    1.57    0.95
   0   6 -20    0.27    0.37
   0  -6 -20    2.98    1.09
   0  -6 -20    1.13    1.02
   0  -6  20   -0.53    1.01
   0  -6  20   -0.30    0.82
   0  -6  20   -0.10    0.62
   0   6 -20    0.60    0.57
   0  -6  20    1.11    0.74
   0  -6 -21  284.65   11.13
   0  -6  21  275.81   14.59
   0  -6  21  284.76   12.99
   0   6  21  243.04    9.14
   0  -6  21  274.88   10.67
   0   6 -21  290.74    9.06
   0  -6 -21  290.27   13.18
   0   6 -21  308.91   11.07
   0  -6  21  267.54   14.46
   0   6 -22  363.15   12.35
   0  -6  22  410.51   15.75
   0   6  22  347.46   11.08
   0  -6  22  381.42   17.88
   0  -6 -22  347.27   14.41
   0  -6  22  382.92   17.72
   0   6 -22  352.90   10.16
   0  -6 -22  332.00   12.33
   0   6 -23   63.34    4.40
   0  -6 -23   62.95    6.28
   0   6  23   50.16    4.25
   0  -6  23   55.98    6.90
   0   6 -23   67.99    5.50
   0  -6 -23   60.96    5.38
   0  -6  23   59.12    6.11
   0  -6  23   56.88    7.14
   0   6 -24    0.95    0.61
   0  -6 -24    0.62    0.77
   0  -6  24    0.71    0.59
   0   6 -24    1.46    0.98
   0  -6 -24    0.44    0.52
   0  -6  24    1.01    0.73
   0  -6  24    1.75    1.43
   0  -6 -25   50.72    5.83
   0  -6 -25   50.45    5.04
   0  -6  25   63.33    8.02
   0   6 -25   50.85    4.09
   0   6 -25   52.60    5.06
   0  -6  25   55.28    7.19
   0  -6  25   64.82    6.53
   0  -6  26   95.62    7.95
   0  -6 -26   82.40    7.35
   0  -6  26   95.77   10.02
   0  -6  26   86.56    9.19
   0  -6 -26   79.80    6.46
   0   6 -26   83.46    5.35
   0   6 -26   90.62    6.76
   0   6 -27  277.27   12.12
   0  -6 -27  252.55   11.67
   0   6 -27  270.45    9.74
   0  -6  27  267.42   17.08
   0  -6  27  259.99   16.12
   0  -6 -27  257.37   13.01
   0  -6  27  277.24   13.70
   0  -6  28   28.44    4.45
   0  -6  28   25.63    5.44
   0   6 -28   30.62    4.15
   0  -6 -28   27.25    3.93
   0  -6 -28   29.82    4.54
   0  -6  28   27.73    5.30
   0  -6  29   11.12    1.35
   0  -6  29   10.84    2.75
   0  -6 -29   10.45    2.46
   0   6 -29   13.22    2.79
   0  -6 -29   12.00    1.46
   0  -6  29   11.02    1.67
   0   6  29   11.72    1.72
   0  -6 -29   10.77    2.87
   0   6  29   10.60    1.41
   0  -6  29   11.63    3.68
   0  -6  29   10.14    3.33
   0  -6 -30    9.40    2.68
   0  -6  30    8.57    3.39
   0  -6  30    9.25    1.58
   0  -6  30    9.80    1.30
   0   6  30    8.04    1.35
   0  -6 -30    9.80    1.38
   0  -6 -30    9.28    2.35
   0   6 -30    9.63    2.40
   0  -6  30   13.46    3.20
   0   6  30   10.67    1.66
   0  -6  30   10.37    3.43
   0   6  30   10.90    1.41
   0  -6 -31  178.28    5.76
   0  -6 -31  155.53    9.74
   0   6  31  148.90    5.67
   0  -6  31  139.53   12.63
   0  -6  31  144.02    5.92
   0  -6  31  147.00    6.18
   0  -6 -31  149.15   10.26
   0  -6  31  149.89   13.81
   0   6  31  160.57    6.50
   0   6 -31  166.43   10.09
   0  -6  31  144.39    4.92
   0   6  31  134.19    4.87
   0  -6  31  145.96   10.30
   0   6  31  149.00    5.64
   0  -6  32    9.74    1.35
   0   6 -32    8.32    2.38
   0   6  32    8.97    1.27
   0  -6  32   12.05    3.23
   0   6  32    8.74    1.54
   0  -6  32   11.46    1.74
   0  -6  32    8.02    1.57
   0  -6  32   12.12    3.86
   0   6  32    8.56    1.45
   0   6  32    9.97    1.48
   0  -6 -32   10.08    1.43
   0  -6  32   14.42    4.47
   0  -6 -32    5.42    1.88
   0  -6 -32    7.98    2.35
   0  -6  33  223.48    7.81
   0  -6 -33  208.52   12.30
   0   6  33  228.96    7.89
   0  -6  33  221.35    7.40
   0  -6  33  239.87   17.78
   0   6  33  223.26    7.10
   0  -6 -33  220.40   12.04
   0   6 -33  237.77   12.51
   0   6  33  204.72    6.06
   0   6  33  220.11    7.04
   0  -6 -33  238.65    6.78
   0  -6  33  216.37    6.07
   0  -6  33  225.82   16.41
   0  -6  34    0.77    0.41
   0   6  34    0.45    0.60
   0   6 -34   -0.36    0.79
   0  -6 -34   -0.82    1.40
   0  -6 -34    0.70    1.11
   0  -6 -34    0.80    0.48
   0  -6  34    0.80    0.79
   0  -6  34    1.50    2.24
   0  -6  34    0.26    0.62
   0   6  34    1.34    0.76
   0   6  34    0.71    0.55
   0   6  34    1.24    0.60
   0  -6  34    0.47    1.36
   0  -6 -35  113.09    8.72
   0   6  35  104.09    4.32
   0  -6  35  120.55    5.76
   0  -6  35  119.69   12.66
   0  -6 -35  109.44    9.04
   0  -6 -35  140.65    5.22
   0   6  35  119.08    5.29
   0   6  35  125.14    5.91
   0   6 -35  126.27    9.38
   0  -6  35  108.00   11.44
   0   6  35  118.34    5.16
   0  -6  35  110.74    5.32
   0   6  36    9.43    1.45
   0   6  36    8.26    1.29
   0  -6  36   10.82    1.79
   0  -6  36    8.04    1.57
   0   6  36    8.84    1.50
   0  -6 -36    9.56    1.40
   0   6  36    8.25    1.63
   0   6  37  171.49    6.92
   0  -6  37  174.25    6.91
   0   6  37  165.57    5.37
   0  -6  37  173.08    6.55
   0  -6 -37  190.84    6.10
   0   6  37  175.81    6.33
   0   6  37  177.37    6.46
   0   6  38    0.52    0.47
   0   6  38    0.62    0.46
   0   6  38    1.83    0.81
   0  -6  38    1.36    0.67
   0  -6 -38    0.73    0.44
   0  -6  38    1.00    0.70
   0   6  38    0.94    0.43
   0  -6 -39    6.88    1.16
   0   6  39    5.65    0.99
   0   6  39    6.02    1.35
   0  -6  39    4.72    1.02
   0   6  39    4.86    1.15
   0  -6  39    5.75    1.20
   0   6  39    5.54    1.21
   0   6  40   28.81    2.76
   0  -6 -40   28.63    2.32
   0  -6  40   29.90    2.78
   0  -6  40   32.43    2.80
   0   6  40   31.10    2.18
   0   6  40   33.60    2.81
   0   6  40   33.96    2.75
   0   6  41   77.72    4.20
   0  -6  41   77.10    4.23
   0  -6 -41   86.94    4.02
   0   6  41   77.49    4.08
   0   6  41   75.03    4.34
   0  -6  41   72.54    4.24
   0   6  41   69.66    3.19
   0   6  42   37.78    3.07
   0  -6  42   38.40    2.92
   0  -6  42   38.37    3.00
   0   6  42   40.43    2.95
   0  -6 -42   39.22    2.64
   0   6  42   37.18    2.78
   0   6  43    1.67    0.67
   0   6  43    1.38    0.56
   0  -6  43    1.56    0.63
   0  -6  43    2.67    0.87
   0  -6 -43    1.05    0.60
   0   6  43    1.49    0.51
   0  -6  44    0.55    0.36
   0   6  44    0.83    0.69
   0  -6 -44    0.72    0.35
   0   6  44    0.90    0.63
   0  -6  44    1.05    0.68
   0   6  44    0.76    0.41
   0  -6 -45    1.92    0.65
   0   6  45    1.37    0.66
   0   6  45    1.26    0.50
   0  -6  45    2.80    0.94
   0  -6  45    1.72    0.64
   0   6  45    1.49    0.61
   0  -6  46   65.82    3.40
   0   6  46   66.10    3.43
   0   6  46   68.79    3.34
   0  -6  46   71.49    3.48
   0  -6 -46   62.43    2.96
   0   6  46   55.87    3.19
   0  -6  47   73.50    3.39
   0  -6  47   70.88    3.34
   0  -6 -47   70.56    2.98
   0   6  47   74.78    3.47
   0   6  47   66.67    3.32
   0   6  47   73.70    3.31
   0   6  48   14.58    1.46
   0  -6 -48   13.97    1.26
   0   6  48   16.14    1.53
   0  -6  48   16.03    1.50
   0   6  48   16.49    1.49
   0  -6  48   16.40    1.56
   0   6  49   11.74    1.19
   0   6  49   12.87    1.26
   0  -6 -49   14.04    1.16
   0   6  49   11.50    1.27
   0  -6  49   10.96    1.23
   0  -6  49   11.99    1.17
   0   6  50    0.37    0.31
   0   6  50    0.59    0.35
   0   6  50   -0.17    0.23
   0  -6  50    0.28    0.25
   0   6  51  104.40    3.17
   0   6  51  110.45    3.06
   0  -6  51  115.24    3.30
   0   6  52   19.13    1.14
   0  -6  52   18.79    1.22
   0   6  52   17.45    1.17
   0   8   0  275.45    9.67
   0  -8   0  283.60    8.98
   0  -8   0  279.21    9.55
   0   8  -1  538.20   13.70
   0  -8  -1  519.53   13.34
   0   8   1  541.68   13.36
   0  -8   1  489.25   12.47
   0  -8   1  521.55   12.46
   0  -8  -1  533.91   12.18
   0   8   2  188.16    7.82
   0   8  -2  192.12    8.36
   0  -8  -2  238.89    8.03
   0  -8   2  235.17    8.53
   0  -8   2  224.99    8.42
   0  -8  -2  236.28    9.25
   0  -8   3  225.70    8.52
   0  -8   3  212.08    8.06
   0   8   3  325.18   10.17
   0   8  -3  308.30   10.78
   0   8   4  442.10   11.92
   0   8  -4  448.14   13.25
   0  -8   4  575.28   14.02
   0  -8   4  545.61   12.86
   0  -8  -4  400.98   11.63
   0  -8   5  180.07    7.37
   0   8  -5  216.19    9.42
   0   8   5  216.52    8.25
   0  -8  -5  186.93    8.17
   0  -8   5  193.20    8.39
   0  -8  -6   15.40    2.49
   0  -8   6   19.19    2.87
   0   8   6   17.63    2.44
   0   8  -6   21.86    3.10
   0  -8   6   16.95    2.58
   0  -8   6   17.08    2.30
   0  -8   7  331.56    9.98
   0   8   7  364.07   10.66
   0  -8   7  369.27   12.35
   0  -8   7  350.60   12.40
   0  -8  -7  340.61   11.80
   0  -8   7  356.88   12.39
   0   8  -7  378.64   13.17
   0  -8   8   34.78    3.93
   0   8   8   43.72    3.74
   0   8  -8   47.88    4.88
   0  -8   8   32.73    3.89
   0  -8   8   37.91    4.15
   0  -8   8   31.23    3.09
   0  -8  -8   39.41    4.24
   0  -8   9   79.49    6.10
   0  -8   9   65.96    5.72
   0  -8   9   69.42    4.62
   0  -8  -9   57.56    5.19
   0   8   9   59.60    4.40
   0   8   9   67.75    5.02
   0   8  -9   64.45    5.79
   0  -8   9   67.93    5.58
   0  -8  10   29.46    3.86
   0  -8  10   27.30    3.67
   0  -8 -10   22.42    3.37
   0   8  10   24.20    2.89
   0  -8  10   25.93    3.72
   0   8 -10   24.52    3.70
   0  -8  10   24.06    2.69
   0   8  10   26.97    3.19
   0  -8  11  300.79   12.76
   0   8 -11  383.08   14.64
   0  -8  11  281.62    9.33
   0  -8  11  321.25   13.05
   0   8  11  365.49   11.17
   0   8  11  285.71   10.44
   0  -8 -11  328.36   12.96
   0  -8  11  310.90   12.49
   0   8  12  528.62   14.20
   0  -8  12  546.15   17.57
   0  -8  12  529.74   12.90
   0   8  12  512.73   13.41
   0   8 -12  537.26   17.70
   0  -8 -12  505.09   16.47
   0  -8  12  560.52   17.24
   0  -8  13   55.65    5.79
   0   8  13   53.39    4.42
   0  -8  13   52.82    5.51
   0  -8 -13   47.80    5.21
   0   8  13   47.53    4.32
   0   8 -13   55.98    5.87
   0   8 -13   55.35    3.41
   0  -8  13   46.77    5.33
   0  -8  13   46.74    3.92
   0  -8  14    1.38    0.88
   0  -8  14    0.86    0.90
   0   8 -14    5.11    1.10
   0   8 -14    7.03    2.03
   0   8  14    6.70    1.61
   0   8  14    0.41    0.76
   0  -8 -14    4.82    1.62
   0  -8  14    0.81    1.00
   0  -8  14    1.41    1.35
   0  -8  15   92.64    7.99
   0   8 -15   73.17    7.08
   0  -8  15   81.97    5.29
   0  -8  15   90.54    7.59
   0  -8  15   86.18    7.46
   0   8 -15   83.82    4.37
   0   8  15   73.81    5.52
   0   8  15   80.22    5.63
   0  -8 -15   73.55    6.64
   0   8  16   83.97    5.80
   0  -8 -16   97.74    7.91
   0  -8  16   94.89    8.01
   0  -8  16  106.32    8.85
   0   8 -16  102.58    8.53
   0  -8  16  103.05    8.28
   0   8  16   93.92    6.32
   0  -8  16   92.62    5.77
   0   8 -16  104.16    4.96
   0  -8  17  392.52   16.72
   0   8 -17  389.91    9.84
   0   8  17  347.78   11.89
   0  -8  17  361.20   11.52
   0  -8  17  385.69   16.29
   0   8 -17  352.67   16.25
   0  -8 -17  361.12   15.45
   0  -8  17  392.30   17.50
   0   8  18  198.34    9.00
   0  -8 -18  200.37   11.72
   0  -8  18  220.95   12.94
   0  -8  18  223.79   12.58
   0  -8 -18  199.01    9.24
   0  -8  18  228.00   13.77
   0  -8  18  222.02    9.29
   0  -8  19  194.24   11.83
   0  -8  19  188.13   12.30
   0   8 -19  177.76    8.06
   0  -8 -19  170.16   11.00
   0   8  19  165.52    8.27
   0  -8  19  197.73   13.19
   0  -8 -19  157.69    8.47
   0  -8  19  185.72    8.71
   0  -8  20  634.15   21.74
   0  -8 -20  593.47   16.96
   0  -8  20  633.16   23.18
   0  -8  20  622.15   16.36
   0   8  20  564.85   15.37
   0  -8  20  650.50   24.56
   0  -8 -20  630.05   21.63
   0  -8  21   13.02    3.26
   0  -8 -21   17.36    3.70
   0  -8  21   12.86    3.58
   0  -8  21   10.78    3.23
   0  -8 -21   16.31    2.82
   0  -8  21   10.21    2.11
   0   8  21    9.79    2.13
   0  -8  22  175.47   13.39
   0  -8  22  175.66   13.00
   0   8  22  157.35    8.21
   0  -8 -22  170.57   11.69
   0  -8  22  187.96   12.04
   0  -8  22  177.12    9.10
   0  -8  23   11.40    3.41
   0   8  23   11.13    2.17
   0  -8  23   17.82    4.37
   0  -8  23   15.41    3.51
   0  -8  23   16.53    2.93
   0  -8 -23   11.54    3.25
   0  -8  24   65.18    8.38
   0  -8  24   63.08    7.20
   0  -8 -24   59.73    7.12
   0  -8  24   63.92    8.47
   0  -8 -25    2.93    1.59
   0  -8  25    6.21    2.66
   0  -8  25    8.82    3.22
   0  -8  25    5.28    2.15
   0  -8  26  661.61   23.47
   0  -8 -26  582.96   10.46
   0   8  26  551.88    9.80
   0  -8  26  628.91   27.30
   0  -8  26  594.60   26.47
   0  -8 -26  528.27   20.93
   0  -8  26  557.57   11.91
   0   8  26  569.08   11.95
   0   8  27   79.26    4.53
   0  -8  27   82.98    8.37
   0  -8 -27   84.36    4.01
   0   8  27   70.65    3.54
   0  -8  27   76.39    3.43
   0  -8  27   77.09    9.76
   0  -8 -27   67.17    7.53
   0  -8  27   84.34   10.16
   0  -8  27   71.95    4.34
   0  -8  28   78.31    9.99
   0   8  28   97.38    5.08
   0  -8  28   84.94    3.68
   0  -8  28   80.54    8.30
   0  -8  28   78.19   10.00
   0   8  28   73.31    3.65
   0  -8 -28   93.07    8.95
   0  -8  28   76.28    4.55
   0  -8 -28  104.61    4.50
   0  -8  29   44.56    7.56
   0  -8 -29   41.41    2.84
   0  -8  29   39.53    3.29
   0   8  29   38.78    3.22
   0  -8 -29   35.61    5.49
   0  -8  29   36.24    2.42
   0  -8  29   45.75    7.82
   0   8  29   37.33    2.61
   0   8  30   28.80    2.31
   0  -8  30   35.45    2.42
   0  -8  30   30.96    6.44
   0  -8  30   36.81    7.01
   0  -8 -30   46.58    3.03
   0   8  30   37.90    2.82
   0  -8  30   33.14    3.03
   0   8  30   42.11    3.44
   0   8  30   34.14    2.82
   0  -8 -30   40.33    5.88
   0  -8  31  235.47   18.00
   0  -8 -31  211.87   13.52
   0  -8  31  218.01    7.78
   0  -8  31  217.07    6.04
   0   8  31  237.65    8.07
   0   8  31  225.27    6.94
   0  -8  31  233.30   17.84
   0  -8 -31  255.48    7.07
   0   8  31  211.82    6.29
   0   8  31  236.32    7.31
   0   8  32   24.37    2.37
   0  -8  32   21.10    2.47
   0  -8  32   21.03    5.48
   0  -8  32   21.81    1.95
   0   8  32   22.92    2.33
   0   8  32   20.79    2.03
   0  -8 -32   21.53    4.30
   0   8  32   24.87    2.65
   0  -8 -32   24.66    2.23
   0  -8  32   20.52    5.52
   0   8  33    2.75    0.81
   0   8  33    2.63    0.93
   0  -8  33   -0.83    1.93
   0  -8 -33    3.14    0.88
   0  -8  33    2.65    0.75
   0  -8 -33    2.92    1.76
   0  -8  33    1.57    1.17
   0   8 -33    3.15    2.15
   0  -8  33    2.22    1.00
   0   8  33    3.03    0.94
   0   8  33    2.91    0.90
   0  -8 -34   10.03    1.43
   0   8  34    7.96    1.21
   0   8  34    9.01    1.46
   0   8  34    9.13    1.58
   0  -8  34    9.64    1.65
   0   8  34    9.62    1.52
   0  -8  34    9.70    1.32
   0   8  35   89.20    4.55
   0  -8 -35   98.52    4.43
   0  -8  35   82.94    4.78
   0   8  35   79.07    3.81
   0   8  35   90.42    5.02
   0   8  35   92.06    4.53
   0   8  36    0.98    0.42
   0   8  36    0.90    0.57
   0   8  36    0.98    0.63
   0   8  36   -0.03    0.39
   0  -8  36    1.09    0.80
   0  -8 -36   -0.12    0.54
   0  -8  37   57.51    3.95
   0   8  37   59.66    3.64
   0   8  37   54.06    3.06
   0  -8 -37   64.43    3.55
   0   8  37   62.22    3.75
   0   8  37   58.88    4.00
   0   8  38    0.33    0.60
   0   8  38    0.23    0.31
   0  -8 -38    0.20    0.37
   0   8  38    0.48    0.52
   0   8  38    0.66    0.59
   0  -8  38    0.64    0.60
   0   8  39    0.90    0.51
   0   8  39    1.38    0.54
   0  -8  39    0.41    0.48
   0   8  39    1.76    0.93
   0   8  39    1.08    0.37
   0  -8 -39    1.59    0.62
   0  -8 -40  171.52    5.60
   0   8  40  159.13    4.90
   0   8  40  176.22    6.04
   0  -8  40  170.69    6.33
   0   8  40  161.89    6.35
   0   8  40  175.78    6.08
   0  -8 -41   13.85    1.57
   0   8  41   12.98    1.68
   0  -8  41   14.88    1.97
   0   8  41   12.22    1.35
   0   8  41   13.30    1.77
   0   8  41   11.98    1.57
   0   8  42   23.92    2.33
   0  -8 -42   24.31    2.02
   0   8  42   23.59    2.16
   0   8  42   24.14    2.22
   0  -8  42   24.61    2.31
   0   8  42   21.17    1.66
   0   8  43    5.96    1.04
   0   8  43    6.06    1.03
   0   8  43    5.09    1.09
   0   8  43    4.89    0.72
   0  -8 -43    6.46    1.07
   0  -8  43    6.68    1.26
   0   8  44    3.28    0.58
   0   8  44    2.96    0.84
   0  -8  44    3.49    0.94
   0   8  44    3.72    0.86
   0   8  44    3.87    0.91
   0  -8 -44    3.35    0.78
   0   8  45   -0.54    0.43
   0   8  45   -0.30    0.31
   0   8  45    0.52    0.49
   0  -8 -45    0.13    0.21
   0  -8  45    0.41    0.42
   0   8  46   29.48    2.16
   0   8  46   31.74    2.10
   0  -8 -46   31.66    1.99
   0   8  46   30.90    2.14
   0  -8  46   31.37    2.23
   0  -8 -47   17.02    1.39
   0  -8  47   13.09    1.41
   0   8  47   15.10    1.49
   0   8  47   14.59    1.40
   0   8  47   15.15    1.36
   0  -8  48   44.47    2.36
   0  -8 -48   45.79    2.12
   0   8  48   46.70    2.35
   0   8  48   42.47    2.30
   0   8  48   43.38    2.10
   0   8  49    3.73    0.65
   0  -8  49    3.91    0.71
   0   8  49    2.84    0.49
   0  -8 -49    4.34    0.62
   0   8  49    3.26    0.64
   0   8  50    3.55    0.56
   0  -8  50    4.08    0.65
   0   8  50    3.81    0.55
   0   8  51   39.63    1.65
   0  -8  51   41.78    1.77
   0 -10   0 1669.82   27.32
   0 -10   0 1744.31   25.83
   0 -10  -1   10.03    2.01
   0 -10   1    9.95    2.13
   0  10  -1   16.10    2.79
   0 -10   1    7.60    1.84
   0  10   1   13.11    2.40
   0 -10  -1    8.81    2.07
   0  10  -2   24.74    3.47
   0 -10   2   20.85    3.07
   0 -10  -2   19.78    3.13
   0 -10   2   20.40    2.91
   0  10   2   23.90    3.28
   0  10  -3  472.92   15.27
   0 -10   3  508.91   14.64
   0 -10  -3  506.24   15.86
   0 -10   3  480.60   14.15
   0  10   3  467.89   14.02
   0  10   4  376.70   12.49
   0 -10  -4  417.33   14.74
   0 -10   4  387.58   12.65
   0  10  -4  371.58   13.75
   0 -10   4  406.75   13.49
   0  10   5  887.92   19.15
   0 -10   5 1116.95   22.80
   0 -10  -5 1135.67   24.86
   0  10  -5  882.19   21.71
   0 -10   5 1053.77   20.73
   0  10   6  151.11    7.83
   0 -10   6  130.33    7.28
   0 -10   6  152.39    8.68
   0  10  -6  148.72    9.10
   0  10   7   14.12    2.44
   0  10   7   25.41    3.59
   0 -10   7   22.49    3.40
   0 -10   7   22.01    2.98
   0  10  -7   15.80    2.98
   0  10   8   10.34    2.34
   0 -10   8   10.69    2.12
   0  10   8    5.65    1.46
   0 -10   8   10.99    2.48
   0 -10  -8    6.04    2.00
   0  10  -8    8.06    2.31
   0 -10   9   89.70    6.00
   0 -10   9  101.04    7.63
   0 -10  -9   67.26    6.28
   0  10   9   75.53    5.55
   0  10  -9   76.33    6.93
   0  10   9   87.49    6.67
   0 -10  10    0.14    0.54
   0  10  10    0.60    0.59
   0 -10  10    0.96    0.72
   0 -10 -10    0.66    0.42
   0 -10  10    0.04    0.81
   0  10 -10    0.70    1.11
   0  10  10    1.03    0.81
   0 -10  11    4.70    1.44
   0  10  11    1.41    1.00
   0 -10  11    4.50    1.64
   0  10 -11    2.46    1.63
   0 -10 -11    3.17    1.60
   0  10  11    4.99    1.61
   0 -10 -12   35.01    4.99
   0  10  12   36.21    3.95
   0 -10  12   39.52    5.24
   0 -10  12   33.53    3.71
   0 -10  12   35.62    5.02
   0  10 -12   35.15    5.06
   0  10  12   33.00    4.09
   0 -10  13    0.31    0.92
   0  10  13    1.02    0.79
   0  10  13    1.26    0.97
   0 -10  13    1.71    1.04
   0 -10 -13    1.23    1.22
   0  10 -13   -0.21    0.80
   0 -10  13    0.36    0.32
   0  10  14  105.52    6.93
   0  10 -14  105.60    9.23
   0  10  14  107.05    7.44
   0 -10  14  118.82    9.66
   0 -10 -14   96.71    8.47
   0 -10  14  107.19    6.64
   0 -10  14  117.59    9.43
   0  10  15   17.06    2.92
   0  10  15   21.25    3.18
   0 -10  15   19.48    3.94
   0 -10  15   16.41    2.61
   0 -10 -15   17.76    3.79
   0 -10  15   19.28    4.10
   0  10 -15   21.43    4.34
   0  10 -16  215.72   13.66
   0 -10  16  245.26   14.83
   0 -10 -16  195.87   12.68
   0  10  16  213.22   10.56
   0 -10  16  210.20    9.46
   0 -10  16  228.93   13.78
   0  10  17    5.82    1.87
   0 -10  17    5.85    2.37
   0 -10  17    6.71    2.70
   0 -10  17    5.24    1.55
   0 -10 -17    5.31    2.18
   0  10 -17    7.20    2.66
   0 -10  18    4.21    2.46
   0 -10 -18    1.55    1.60
   0  10  18    2.16    1.22
   0 -10  18    1.90    1.03
   0  10 -18    0.14    1.11
   0 -10  18    2.27    1.68
   0 -10  19   50.84    7.05
   0 -10  19   51.80    4.97
   0 -10  19   51.46    7.40
   0  10 -19   38.38    6.12
   0 -10 -19   38.12    5.95
   0  10  19   47.72    5.04
   0  10  20  577.40   17.41
   0  10 -20  610.26   24.85
   0 -10  20  622.96   17.46
   0 -10  20  638.75   25.27
   0 -10  20  641.60   27.06
   0 -10 -20  596.03   23.81
   0 -10 -21   27.01    5.21
   0 -10  21   31.55    5.84
   0 -10  21   28.48    3.83
   0  10  21   28.77    3.95
   0  10  21   29.89    2.76
   0 -10  21   30.75    6.12
   0  10 -21   26.64    5.37
   0 -10 -21   30.43    2.47
   0 -10  22    6.55    3.10
   0  10 -22    4.45    2.10
   0 -10  22    4.90    1.15
   0  10  22    4.94    1.07
   0 -10  22    3.96    2.05
   0  10  22    3.59    1.35
   0 -10 -22    5.79    1.12
   0 -10 -22    5.25    2.11
   0 -10  22    5.50    1.10
   0 -10  22    5.12    1.58
   0  10  23   43.12    3.42
   0  10  23   42.09    4.70
   0 -10 -23   37.60    6.25
   0 -10  23   40.95    6.91
   0 -10 -23   44.65    3.02
   0 -10  23   36.68    3.11
   0 -10  23   39.55    7.09
   0 -10  23   32.47    2.86
   0 -10  23   36.89    4.49
   0  10 -23   36.62    6.55
   0 -10  24   87.29    7.06
   0 -10 -24   66.43    8.47
   0 -10  24   84.65   10.17
   0 -10  24   89.09   10.83
   0 -10  24   65.86    4.11
   0  10 -24   64.81    8.70
   0 -10  24   69.71    4.44
   0 -10 -24   70.68    3.75
   0  10  24   74.68    4.44
   0  10 -25   89.04   10.35
   0 -10 -25   89.55    9.86
   0 -10  25  100.81   11.73
   0 -10  25   77.80    4.48
   0 -10 -25   99.61    4.50
   0 -10  25   89.62   10.65
   0 -10  25   86.59    3.64
   0  10  25   89.96    4.15
   0  10  25  100.10    5.21
   0 -10  25   80.94    4.81
   0 -10  26   13.06    4.12
   0  10  26   17.74    2.18
   0 -10  26   12.85    1.41
   0 -10 -26   15.05    1.78
   0  10 -26   13.50    4.16
   0  10  26   12.67    1.56
   0 -10  26   11.52    1.88
   0 -10 -26   10.33    3.59
   0 -10  26   11.63    1.85
   0 -10  26   13.25    4.21
   0 -10  27   12.30    1.42
   0 -10  27   11.78    1.87
   0 -10 -27   13.94    1.73
   0 -10  27   12.61    4.34
   0 -10  27    9.60    3.40
   0  10  27   14.87    2.17
   0 -10 -27    9.66    3.30
   0 -10  27   11.22    1.65
   0  10 -27   14.45    4.51
   0  10  27   12.54    1.57
   0 -10  28  253.08    7.96
   0 -10 -28  308.59    7.93
   0 -10  28  311.37   21.03
   0 -10  28  292.12    9.28
   0 -10  28  322.13   21.52
   0  10 -28  252.06   17.84
   0 -10 -28  273.14   16.95
   0  10  28  292.51    7.57
   0  10  28  310.64    8.40
   0  10  28  314.27    9.38
   0 -10  28  291.73    6.88
   0 -10  29    0.93    1.72
   0 -10  29    2.11    0.59
   0  10  29    2.69    0.89
   0  10  29    3.10    0.93
   0 -10  29    3.30    0.77
   0 -10  29    2.62    2.78
   0  10 -29    2.85    1.92
   0  10  29    3.21    1.00
   0 -10 -29    4.22    1.05
   0 -10 -29    1.67    1.41
   0 -10  29    2.53    1.04
   0  10  30   35.53    2.90
   0  10  30   36.17    3.27
   0 -10  30   32.05    2.77
   0 -10  30   37.57    7.60
   0 -10 -30   35.27    2.72
   0  10  30   35.34    2.66
   0 -10  30   35.67    2.44
   0  10 -30   32.29    6.47
   0 -10 -30   32.50    5.92
   0 -10  30   34.26    3.17
   0 -10 -31   52.97    3.33
   0 -10  31   47.94    3.79
   0 -10  31   47.50    2.79
   0  10  31   51.56    3.49
   0  10  31   47.89    3.07
   0  10  31   52.81    3.90
   0  10  32   77.83    4.25
   0  10  32   78.10    4.72
   0  10  32   69.37    3.69
   0 -10 -32   76.61    3.96
   0 -10  32   71.28    4.59
   0 -10  32   66.45    3.30
   0  10  33   15.79    2.14
   0 -10  33   17.06    2.27
   0  10  33   17.24    1.83
   0 -10 -33   14.77    1.79
   0  10  33   17.57    2.08
   0  10  34    1.05    0.69
   0 -10  34   -0.60    0.63
   0  10  34    0.07    0.49
   0  10  34   -0.42    0.55
   0 -10 -34    0.40    0.59
   0  10  35   95.09    4.16
   0  10  35   93.62    5.06
   0  10  35   99.34    4.74
   0 -10 -35   86.88    4.12
   0 -10  35   92.47    5.08
   0  10  36    0.04    0.39
   0 -10  36   -0.05    0.52
   0  10  36    0.43    0.28
   0  10  36    1.15    0.66
   0 -10 -36   -0.25    0.35
   0  10  37    8.47    1.41
   0 -10 -37    8.17    1.25
   0 -10  37    6.26    1.26
   0  10  37    7.02    1.13
   0  10  37    6.90    1.38
   0 -10 -38   37.14    2.61
   0  10  38   38.38    3.10
   0  10  38   34.72    2.38
   0 -10  38   36.65    3.03
   0  10  38   39.73    2.92
   0  10  39    3.14    0.90
   0  10  39    1.81    0.53
   0 -10 -39    1.76    0.68
   0  10  39    1.74    0.83
   0 -10  39    0.99    0.47
   0 -10 -40  111.51    4.28
   0  10  40  116.75    4.06
   0 -10  40  121.57    5.20
   0  10  40  112.32    5.01
   0  10  40  130.14    5.04
   0 -10 -41   18.24    1.69
   0  10  41   17.71    1.99
   0  10  41   19.38    1.93
   0  10  41   16.81    1.46
   0 -10  41   16.33    1.92
   0  10  42    7.09    1.18
   0  10  42    6.54    1.19
   0  10  42    6.22    0.87
   0 -10 -42    6.22    0.97
   0 -10  42    7.35    1.22
   0  10  43    0.38    0.28
   0 -10 -43    0.19    0.28
   0  10  43   -0.41    0.38
   0  10  43   -0.28    0.29
   0 -10  43   -0.19    0.30
   0  10  44   19.12    1.70
   0  10  44   17.94    1.73
   0  10  44   16.69    1.22
   0 -10 -44   20.49    1.59
   0 -10  44   16.93    1.69
   0  10  45    0.79    0.37
   0 -10 -45    0.64    0.29
   0  10  45   -0.01    0.21
   0  10  45    0.19    0.28
   0 -10  45    0.58    0.41
   0  10  46    0.92    0.36
   0 -10 -46    0.23    0.20
   0  10  46    0.86    0.41
   0 -10  46    1.17    0.48
   0 -10  47    1.26    0.47
   0 -10 -47    0.97    0.28
   0  10  47    1.07    0.39
   0  10  47    1.09    0.43
   0 -10 -48   59.47    2.10
   0  10  48   63.20    2.40
   0 -10  48   63.43    2.46
   0  10  48   58.51    2.35
   0 -10  49    0.21    0.19
   0  10  49    0.13    0.23
   0  12   0 1355.82   27.96
   0 -12   0 1161.96   26.12
   0 -12  -1  356.09   14.62
   0  12  -1  354.56   14.50
   0  12   1  352.99   14.08
   0 -12   1  368.33   14.48
   0  12   2  105.27    7.59
   0 -12  -2   97.89    7.82
   0 -12   2  105.51    7.46
   0 -12   2  100.11    7.51
   0  12  -2  109.98    8.18
   0 -12  -3   47.94    5.57
   0  12  -3   31.15    4.48
   0 -12   3   45.60    5.03
   0 -12   3   48.86    5.23
   0  12  -4  120.50    8.85
   0 -12   4  103.90    7.53
   0 -12  -4  109.05    8.51
   0  12   4  107.23    8.40
   0 -12   4  113.74    8.08
   0  12   5  695.66   21.45
   0 -12  -5  713.50   22.05
   0 -12   5  724.30   20.74
   0 -12   5  700.25   19.33
   0  12  -6   33.43    4.83
   0  12   6   44.78    5.46
   0 -12   6   44.45    5.37
   0 -12  -6   46.42    5.75
   0 -12   6   41.89    4.74
   0  12   7   16.89    3.35
   0 -12   7   17.69    3.51
   0  12  -7    8.77    2.40
   0 -12  -7   17.68    3.60
   0 -12   7   16.49    2.95
   0 -12   8    1.33    1.20
   0 -12  -8    2.10    1.29
   0  12  -8    0.54    0.93
   0 -12   8    0.75    0.80
   0  12   8    0.76    0.54
   0 -12   9   36.39    5.10
   0  12   9   38.12    5.07
   0 -12   9   37.61    4.38
   0 -12  -9   39.58    5.58
   0  12  -9   27.24    4.61
   0 -12 -10    3.63    1.97
   0  12 -10    1.47    1.34
   0  12  10    3.05    1.53
   0 -12  10    3.29    1.23
   0 -12  10    3.44    1.75
   0 -12  11   69.33    7.41
   0  12 -11   55.72    6.84
   0 -12  11   58.98    5.44
   0  12  11   64.61    6.55
   0 -12  12   55.24    6.84
   0  12 -12   34.42    5.50
   0 -12  12   48.30    4.97
   0  12  12   48.58    5.64
   0 -12  13    8.99    2.15
   0  12  13    7.55    2.29
   0  12 -13    6.78    2.55
   0 -12  13    7.16    1.39
   0 -12  13    8.66    2.95
   0 -12  14    0.46    0.49
   0 -12  14    0.95    1.20
   0  12  14    0.76    0.74
   0  12 -14    0.59    1.10
   0 -12 -14    1.23    1.00
   0 -12  14    0.52    0.35
   0 -12  14    2.21    1.01
   0 -12  15  173.01    6.93
   0 -12 -15  136.63   11.26
   0 -12  15  217.52   14.58
   0  12  15  183.40    6.81
   0 -12  15  190.94    9.81
   0 -12  15  180.94    7.62
   0  12  15  198.99   11.42
   0  12 -15  150.37   12.01
   0 -12  16  260.10    9.09
   0 -12  16  271.94   16.75
   0  12 -16  226.54   15.03
   0  12  16  247.53   12.79
   0  12  16  256.87    8.07
   0 -12  16  232.82    8.08
   0 -12 -16  207.15   14.08
   0 -12  16  251.75   11.44
   0 -12 -16  260.15    7.60
   0 -12  17   26.37    3.80
   0 -12  17   25.35    2.87
   0 -12 -17   21.83    4.68
   0 -12  17   27.00    5.43
   0  12  17   27.51    2.69
   0  12 -17   19.02    4.61
   0 -12 -17   26.90    2.47
   0  12  17   25.67    4.18
   0 -12  17   27.62    2.85
   0 -12  18    6.71    1.39
   0 -12  18    6.64    1.99
   0 -12  18    5.87    2.46
   0  12  18    7.48    2.08
   0 -12  18    5.93    2.61
   0 -12 -18    3.00    2.09
   0 -12  18    3.69    1.09
   0  12 -18    3.86    2.25
   0  12  18    4.22    1.11
   0 -12 -18    4.10    1.03
   0 -12  19   27.52    3.89
   0  12 -19   22.09    4.85
   0  12  19   30.18    2.91
   0 -12 -19   21.79    4.84
   0 -12  19   26.16    2.79
   0 -12  19   32.91    6.26
   0 -12 -19   27.40    2.50
   0 -12  19   28.49    3.01
   0 -12  19   31.51    6.23
   0  12  19   27.44    4.19
   0  12  20  259.76   12.98
   0 -12  20  245.42    8.67
   0 -12 -20  196.65   14.72
   0 -12  20  236.87    8.38
   0 -12  20  268.95   12.38
   0 -12  20  283.26   18.44
   0  12 -20  218.00   15.67
   0 -12  20  277.29   18.74
   0  12  20  269.42    8.60
   0 -12 -20  244.15    7.36
   0 -12  21   68.65    6.28
   0 -12  21   67.06    9.39
   0 -12 -21   63.57    8.48
   0  12  21   85.06    4.89
   0 -12  21   65.55    4.46
   0 -12  21   72.28    9.52
   0  12 -21   64.80    8.83
   0 -12  21   72.18    4.62
   0  12  21   63.09    6.40
   0 -12 -21   80.42    4.26
   0 -12  22   14.42    2.06
   0 -12 -22   11.98    1.69
   0 -12  22   14.63    4.52
   0 -12  22   14.85    2.05
   0  12  22   15.82    3.23
   0 -12  22   18.50    4.99
   0 -12  22   13.99    2.13
   0  12  22   15.46    2.17
   0 -12  22   16.10    3.19
   0  12 -22   14.60    4.06
   0 -12 -22   13.09    4.27
   0 -12  23   37.42    7.15
   0 -12  23   33.00    3.14
   0  12 -23   22.05    5.16
   0 -12  23   31.19    3.02
   0  12  23   30.53    3.01
   0  12  23   33.68    2.76
   0 -12  23   41.84    5.04
   0 -12 -23   26.66    2.49
   0 -12  23   43.01    7.93
   0 -12 -23   22.69    5.39
   0 -12  23   28.47    2.84
   0 -12  24   18.74    5.24
   0 -12 -24   22.71    2.27
   0  12 -24   14.54    4.07
   0 -12  24   16.87    2.16
   0  12  24   20.29    2.13
   0 -12  24   18.89    3.45
   0  12  24   22.20    2.51
   0 -12 -24   21.07    5.27
   0 -12  24   18.66    2.37
   0  12  24   17.51    1.91
   0 -12  24   16.41    2.19
   0 -12  24   12.95    4.47
   0 -12 -25   34.30    6.58
   0  12  25   40.39    2.92
   0 -12  25   45.17    8.17
   0 -12 -25   48.21    3.28
   0  12  25   48.63    3.74
   0  12  25   41.98    3.08
   0 -12  25   36.70    3.28
   0 -12  25   34.97    3.23
   0 -12  25   37.18    3.10
   0 -12  25   34.34    7.10
   0  12 -25   37.61    7.00
   0 -12  26   87.63    4.60
   0 -12 -26   94.13    4.53
   0  12  26   97.24    4.49
   0 -12  26   90.14    5.12
   0  12  26  101.61    4.85
   0  12  26  102.18    5.45
   0 -12  26   86.42    4.98
   0 -12 -27   42.70    3.01
   0 -12  27   33.84    3.06
   0  12  27   43.58    3.55
   0  12  27   37.98    2.81
   0  12  27   40.67    3.04
   0 -12  27   31.87    3.04
   0 -12 -28   51.29    3.34
   0  12  28   54.24    3.94
   0 -12  28   45.34    3.71
   0  12  28   48.27    3.13
   0 -12  28   45.36    3.53
   0  12  28   50.96    3.41
   0 -12  29   37.66    3.13
   0  12  29   42.75    3.12
   0  12  29   44.72    3.00
   0 -12 -29   34.47    2.71
   0 -12  29   39.68    3.47
   0  12  29   39.25    3.39
   0 -12  30   21.89    2.38
   0 -12 -30   22.30    2.19
   0 -12  30   24.15    2.69
   0  12  30   24.73    2.65
   0  12  30   26.55    2.46
   0  12  30   27.32    2.35
   0 -12 -31    8.03    1.33
   0 -12  31    8.20    1.45
   0  12  31   10.63    1.45
   0 -12  31    7.66    1.49
   0  12  31   10.35    1.74
   0  12  31    9.59    1.49
   0  12  32   80.44    3.92
   0 -12 -32   86.81    4.14
   0 -12  32   70.23    3.93
   0  12  32   88.26    4.95
   0 -12  32   77.42    4.69
   0  12  32   85.25    4.32
   0  12  33  108.20    4.83
   0 -12  33  101.99    5.32
   0 -12 -33   94.29    4.28
   0 -12  33   91.06    4.33
   0  12  33  107.98    5.41
   0  12  33  107.63    4.43
   0 -12  34   80.54    4.66
   0  12  34   87.34    4.76
   0  12  34   86.57    4.28
   0 -12 -34   72.73    3.72
   0  12  34   89.56    3.99
   0  12  35    2.93    0.79
   0  12  35    3.53    0.82
   0  12  35    3.40    1.03
   0 -12  35    3.42    0.93
   0 -12 -35    3.77    0.88
   0 -12  36    3.92    1.12
   0  12  36    5.00    0.94
   0 -12 -36    2.91    0.72
   0  12  36    4.91    1.20
   0  12  36    3.91    0.98
   0 -12 -37   23.03    1.96
   0 -12  37   25.03    2.44
   0  12  37   29.85    2.43
   0  12  37   26.42    2.47
   0  12  37   29.45    2.10
   0 -12  38   25.98    2.42
   0 -12 -38   21.13    1.84
   0  12  38   22.89    2.26
   0  12  38   25.60    2.14
   0  12  38   24.56    1.85
   0  12  39    1.23    0.52
   0 -12 -39    1.33    0.52
   0 -12  39    1.91    0.68
   0  12  39    1.21    0.63
   0  12  39    1.46    0.51
   0 -12  40   20.12    1.97
   0  12  40   22.61    2.09
   0  12  40   23.03    1.94
   0  12  40   21.04    1.58
   0 -12 -40   21.03    1.72
   0  12  41   28.15    2.24
   0 -12 -41   25.17    1.81
   0  12  41   29.66    2.10
   0 -12  41   27.15    2.18
   0  12  41   28.93    1.76
   0  12  42    5.35    0.94
   0 -12  42    4.96    0.95
   0  12  42    4.62    0.67
   0 -12 -42    5.69    0.83
   0  12  42    5.05    0.83
   0  12  43   43.19    1.86
   0 -12  43   39.25    2.32
   0  12  43   41.44    2.47
   0 -12 -43   39.00    2.06
   0  12  43   45.50    2.39
   0  12  44    4.86    0.78
   0 -12  44    4.10    0.75
   0  12  44    4.23    0.55
   0  12  44    4.34    0.79
   0 -12 -44    5.26    0.74
   0 -12 -45    2.19    0.46
   0  12  45    3.10    0.56
   0 -12  45    3.28    0.57
   0  12  45    2.52    0.58
   0  12  46    5.89    0.78
   0 -12  46    4.90    0.64
   0  12  46    5.12    0.66
   0 -12 -46    4.98    0.62
   0 -14   0   21.49    2.08
   0  14   0   13.67    3.49
   0 -14   0   19.39    3.83
   0 -14   1  282.59   14.25
   0 -14   1  304.79    9.96
   0 -14  -1  278.06   14.47
   0 -14  -1  310.43    9.71
   0 -14   1  272.77    7.33
   0  14  -1  262.05   14.98
   0  14   1  264.65   15.02
   0 -14  -1  274.49    7.12
   0 -14   2  230.58    8.96
   0 -14  -2  223.00    8.04
   0 -14  -2  225.38    6.38
   0  14   2  234.42   14.13
   0 -14  -2  228.88   13.24
   0 -14   2  220.93    6.72
   0 -14   2  242.44   12.97
   0  14  -2  233.81   14.20
   0 -14   3   33.61    2.69
   0 -14  -3   34.03    3.19
   0  14  -3   34.69    5.56
   0 -14   3   38.40    3.67
   0 -14   3   35.53    4.90
   0 -14  -3   34.99    2.47
   0 -14  -3   36.86    5.42
   0  14   3   36.56    5.68
   0 -14   4    2.02    0.85
   0 -14   4    0.67    0.51
   0  14   4    2.37    1.62
   0 -14   4    2.29    1.16
   0 -14  -4    0.98    0.41
   0 -14  -4    2.01    0.90
   0  14  -4    3.04    1.88
   0 -14  -4    2.64    1.75
   0 -14  -5  111.61    9.66
   0 -14  -5  126.55    5.73
   0  14  -5  108.21    9.78
   0  14   5  115.05    9.92
   0 -14  -5  119.32    4.45
   0 -14   5  108.12    8.53
   0 -14   5  137.03    7.12
   0 -14   5  116.07    5.14
   0 -14   6  125.77    6.68
   0 -14  -6  113.82    5.26
   0 -14   6  108.83    5.07
   0  14   6  120.58   10.13
   0 -14   6  116.87    8.78
   0 -14  -6  118.74   10.16
   0 -14   7   -0.54    1.18
   0 -14  -7   -0.37    0.33
   0 -14   7    0.40    0.53
   0 -14   7   -0.13    0.52
   0 -14   7    0.57    1.40
   0 -14  -7   -0.08    1.10
   0  14   7    0.89    1.28
   0  14   8    1.40    1.66
   0 -14   8    1.16    0.51
   0 -14  -8    2.73    0.88
   0 -14   8    0.90    1.20
   0 -14  -8   -0.26    1.06
   0 -14   8    1.82    1.07
   0 -14   8    3.79    1.14
   0 -14   9  115.88    6.61
   0 -14  -9  123.38   10.81
   0  14   9  117.52    9.87
   0 -14   9  113.42    8.45
   0 -14   9  112.17    9.83
   0 -14   9  107.50    5.33
   0  14   9  107.73    5.21
   0 -14 -10   -0.29    1.31
   0 -14  10    1.12    0.74
   0 -14  10    0.38    0.69
   0  14  10    0.31    0.45
   0 -14  10    1.42    0.86
   0  14  10    0.60    0.88
   0 -14  10    1.01    0.68
   0 -14  11   33.15    3.12
   0 -14  11   37.00    3.73
   0 -14  11   34.08    4.60
   0 -14 -11   32.48    5.57
   0  14  11   36.18    5.46
   0 -14  11   34.57    5.72
   0  14  11   38.75    3.21
   0  14  12    0.98    1.14
   0 -14  12    1.13    0.97
   0 -14  12    2.12    2.11
   0 -14  12    3.91    1.33
   0 -14  12    3.60    0.96
   0 -14 -12    2.13    1.26
   0 -14  13   29.87    3.39
   0  14  13   30.87    4.90
   0 -14  13   26.11    3.99
   0 -14  13   28.20    2.92
   0 -14  13   30.35    5.61
   0 -14 -13   29.77    5.71
   0  14  13   30.87    2.92
   0 -14  14  354.42   10.55
   0  14 -14  369.24   17.61
   0  14  14  387.57   10.24
   0 -14  14  372.21   14.94
   0 -14  14  380.81   11.91
   0  14  14  358.85   17.03
   0 -14  14  388.90   20.28
   0 -14 -14  366.11   20.10
   0 -14  15   90.42    5.40
   0 -14  15   93.88    5.88
   0 -14  15   98.86    7.71
   0  14 -15   93.82    8.87
   0 -14  15   97.63   10.40
   0  14  15   88.98    4.96
   0  14  15   94.84    8.73
   0 -14 -15   98.83   10.63
   0 -14  16  116.29    6.52
   0 -14 -16  119.34   11.79
   0 -14  16  111.16    8.22
   0 -14  16  120.82   11.83
   0  14  16  117.41    5.72
   0 -14  16  108.76    5.94
   0  14  16  114.57    9.54
   0 -14  17    1.29    1.77
   0  14  17    2.29    0.97
   0 -14  17    0.63    0.64
   0  14  17    3.03    1.59
   0 -14  17    1.45    0.70
   0 -14  17    2.08    0.94
   0 -14 -17    1.28    1.71
   0  14  18   -2.27    1.17
   0  14  18    1.46    0.85
   0 -14  18    0.57    0.45
   0 -14  18    1.43    0.82
   0 -14  18    0.94    0.59
   0 -14 -18    1.83    1.51
   0 -14 -18    1.18    0.79
   0 -14  18   -0.35    1.39
   0  14  19   13.58    2.03
   0 -14  19   12.73    2.12
   0 -14  19   13.89    2.23
   0 -14 -19   15.53    1.96
   0  14  20   80.06    4.83
   0 -14 -20   71.67    4.12
   0 -14  20   70.80    4.80
   0 -14  20   76.55    5.04
   0  14  21  122.08    5.91
   0 -14  21  114.70    6.10
   0 -14  21  116.93    6.21
   0 -14 -21  102.91    4.96
   0  14  22   28.13    2.88
   0  14  22   19.49    2.07
   0 -14  22   19.85    2.47
   0 -14 -22   22.15    2.32
   0 -14  22   19.33    2.53
   0  14  23   -0.65    0.65
   0  14  23    0.88    0.72
   0 -14 -23    1.11    0.54
   0 -14  23    0.30    0.69
   0  14  23   -0.49    0.56
   0 -14  23    0.68    0.57
   0 -14 -24   27.17    2.45
   0  14  24   28.28    2.47
   0 -14  24   26.69    2.76
   0 -14  24   25.58    2.82
   0  14  24   31.67    3.03
   0  14  24   28.76    2.42
   0  14  25  170.96    5.99
   0 -14  25  164.13    7.02
   0 -14  25  157.09    6.45
   0 -14 -25  152.69    5.80
   0  14  25  187.84    6.27
   0  14  25  179.03    7.12
   0 -14 -26  188.39    6.35
   0 -14  26  196.92    7.62
   0  14  26  230.94    8.04
   0  14  26  215.76    6.73
   0 -14  26  191.18    6.82
   0  14  26  226.38    6.80
   0  14  27   23.49    2.16
   0  14  27   26.36    2.71
   0 -14  27   25.08    2.40
   0  14  27   26.95    2.34
   0 -14 -27   25.36    2.35
   0 -14  27   24.62    2.64
   0 -14  28    6.66    1.28
   0  14  28    8.88    1.60
   0 -14 -28    7.39    1.30
   0  14  28    6.69    1.15
   0 -14  28    7.09    1.42
   0  14  28    7.43    1.29
   0 -14  28    7.90    1.57
   0 -14 -29    0.67    0.47
   0  14  29    0.88    0.70
   0  14  29    0.49    0.42
   0 -14  29    0.77    0.75
   0  14  29    1.36    0.57
   0 -14  29    1.03    0.57
   0  14  30    2.98    0.72
   0 -14 -30    2.04    0.67
   0  14  30    3.44    0.90
   0  14  30    2.92    0.90
   0 -14  30    2.10    0.76
   0 -14  30    2.48    0.73
   0  14  31   52.61    3.17
   0 -14  31   47.91    3.24
   0 -14 -31   47.49    2.95
   0  14  31   59.92    3.27
   0  14  31   56.26    3.74
   0 -14  31   47.23    3.38
   0  14  32    8.72    1.47
   0 -14  32   11.42    1.64
   0 -14 -32    6.96    1.13
   0  14  32   12.49    1.54
   0 -14  32   11.99    1.55
   0  14  32   15.91    1.68
   0  14  33   53.85    2.99
   0 -14  33   46.63    2.91
   0 -14  33   45.36    3.14
   0 -14 -33   43.43    2.70
   0  14  33   53.37    3.53
   0  14  33   49.26    2.98
   0 -14  34   38.61    2.82
   0  14  34   43.47    2.57
   0  14  34   45.83    3.18
   0 -14  34   37.64    2.45
   0  14  34   42.11    2.71
   0 -14 -34   38.13    2.46
   0 -14 -35    0.07    0.38
   0  14  35    0.25    0.38
   0 -14  35    0.32    0.47
   0  14  35    0.80    0.50
   0  14  35    0.30    0.30
   0  14  36   15.39    1.73
   0  14  36   16.17    1.58
   0  14  36   16.15    1.49
   0 -14  36   13.58    1.56
   0 -14 -36   14.85    1.44
   0  14  37    7.17    1.22
   0  14  37    9.46    1.11
   0  14  37    9.04    1.17
   0 -14 -37    4.91    0.85
   0 -14  37    8.13    1.19
   0  14  38   15.54    1.31
   0  14  38   14.18    1.39
   0 -14 -38   11.39    1.21
   0  14  38   13.47    1.55
   0 -14  38   13.41    1.44
   0  14  39    1.46    0.42
   0  14  39    1.50    0.49
   0 -14  39    2.18    0.70
   0 -14 -39    0.96    0.34
   0  14  39    0.67    0.39
   0  14  40   21.09    1.74
   0  14  40   20.62    1.33
   0 -14 -40   18.95    1.40
   0 -14  40   18.70    1.43
   0  14  40   20.57    1.52
   0  14  41   16.37    1.45
   0 -14 -41   14.27    1.16
   0 -14  41   14.76    1.18
   0  14  41   19.34    1.20
   0  14  41   17.17    1.30
   0  14  42   60.11    1.89
   0  14  42   56.64    2.48
   0  14  42   56.22    2.09
   0 -14 -43   16.87    1.03
   0  14  43   17.84    1.29
   0 -16   0   18.40    2.00
   0 -16   0   15.65    2.45
   0 -16  -1   17.11    2.40
   0 -16  -1   14.76    1.75
   0 -16   1   16.11    2.41
   0 -16   1   14.19    1.73
   0 -16  -2  115.05    4.74
   0 -16   2  116.91    5.13
   0 -16  -2  114.67    5.92
   0 -16   2  121.68    6.60
   0 -16  -3   16.59    2.26
   0 -16   3   13.36    1.78
   0 -16   3   15.87    2.52
   0 -16  -3   17.09    1.81
   0 -16   4   17.72    2.12
   0 -16  -4   16.56    1.77
   0 -16  -4   17.21    2.24
   0 -16   4   17.29    2.64
   0 -16   5    2.14    0.82
   0 -16  -5    2.40    1.00
   0 -16  -5    1.65    0.64
   0 -16   5    1.69    1.08
   0 -16   6  103.99    5.21
   0 -16  -6  104.54    5.09
   0 -16   6  112.35    6.68
   0 -16   7    2.91    1.00
   0 -16   7    2.03    0.86
   0 -16  -7    1.57    0.64
   0 -16  -8    8.44    1.40
   0 -16   8    9.70    1.66
   0 -16   8    8.70    1.86
   0 -16   9    4.69    1.27
   0 -16   9    4.18    1.39
   0 -16  -9    2.49    0.83
   0 -16  10   13.01    2.01
   0 -16  10   12.77    2.37
   0  16  11   48.58    3.57
   0 -16  11   48.10    4.35
   0 -16  11   42.60    3.62
   0  16  12    1.73    0.86
   0 -16  12    1.77    1.01
   0 -16  12    2.09    0.84
   0 -16  13   40.64    3.66
   0 -16  13   46.23    4.32
   0  16  13   45.82    3.52
   0  16  14  224.06    7.75
   0 -16  14  232.34    9.44
   0 -16  14  227.70    8.67
   0 -16  15    8.41    1.85
   0 -16  15    6.87    1.73
   0  16  15    9.20    1.60
   0 -16  16    0.41    0.46
   0 -16  16    1.40    0.86
   0  16  16    0.84    0.37
   0  16  17  102.19    5.24
   0 -16  17  104.99    6.10
   0 -16  17  101.94    5.78
   0 -16  18   21.97    2.73
   0 -16  18   22.37    2.80
   0  16  18   23.44    2.48
   0  16  18   24.85    2.29
   0  16  19    0.22    0.45
   0 -16  19    1.36    0.94
   0  16  19    0.09    0.39
   0 -16  19    1.10    0.85
   0  16  20    1.09    0.67
   0 -16  20    1.77    0.85
   0  16  20   -0.07    0.41
   0 -16  20    0.70    0.62
   0 -16  21   95.91    5.47
   0 -16  21   89.38    5.20
   0  16  21   98.76    4.49
   0  16  21   92.30    4.93
   0 -16  22  176.82    7.08
   0  16  22  193.56    7.06
   0 -16  22  185.43    7.49
   0  16  22  205.96    6.41
   0 -16 -23    6.13    1.25
   0  16  23    6.91    1.23
   0 -16  23    6.53    1.52
   0  16  23    6.90    1.42
   0 -16  23    6.55    1.40
   0 -16  24    1.72    0.69
   0  16  24    2.37    0.88
   0  16  24    3.52    0.86
   0 -16  24    3.55    1.02
   0 -16 -24    2.04    0.62
   0  16  25   52.43    3.14
   0 -16  25   48.82    3.60
   0  16  25   47.17    3.41
   0 -16  25   44.80    3.22
   0 -16  26  123.78    5.08
   0 -16 -26  106.12    4.41
   0  16  26  153.90    5.25
   0  16  26  140.14    5.75
   0 -16  26  131.84    5.79
   0 -16  27    7.72    1.44
   0  16  27   11.48    1.61
   0  16  27    7.98    1.25
   0 -16 -27    9.57    1.32
   0 -16  27    9.52    1.37
   0 -16  28   34.78    2.40
   0 -16  28   38.63    2.93
   0  16  28   44.60    2.74
   0  16  28   39.90    2.99
   0 -16 -28   30.24    2.24
   0 -16  29   -0.46    0.63
   0  16  29    1.16    0.57
   0 -16  29    0.53    0.46
   0  16  29    0.67    0.41
   0 -16 -29   -0.12    0.22
   0 -16 -30    7.97    1.13
   0  16  30   11.89    1.55
   0  16  30   19.69    1.75
   0 -16  30   16.31    1.78
   0 -16  31   12.84    1.48
   0  16  31   14.21    1.44
   0  16  31   13.48    1.60
   0 -16 -31   11.54    1.25
   0  16  32   10.13    1.37
   0  16  32   10.47    1.19
   0 -16  32    8.58    1.17
   0 -16 -32    7.89    1.01
   0 -16 -33    0.23    0.24
   0 -16  33    0.63    0.35
   0  16  33    0.13    0.23
   0  16  33    0.26    0.28
   0  16  34   48.55    2.35
   0 -16  34   46.62    2.18
   0  16  34   45.12    2.69
   0  16  35   13.04    1.17
   0 -16 -35   11.30    1.07
   0  16  35   12.72    1.36
   0 -16 -36    7.69    0.85
   0  16  36    9.13    0.93
   0  16  36    9.33    1.14
   0  16  37   57.19    2.15
   0  16  37   52.12    2.46
   0  16  38    6.74    0.69
   0 -16 -38    4.80    0.56
   0  16  38    6.48    0.84
   0  16  39    0.40    0.24
   0  16  39    0.81    0.23
   0 -18   0    2.65    0.88
   0 -18   0    2.11    0.65
   0 -18   1    0.26    0.40
   0 -18  -1    0.67    0.40
   0 -18   1   -0.22    0.62
   0 -18  -1    0.78    0.55
   0 -18   2   72.30    4.87
   0 -18  -2   70.21    3.57
   0 -18   2   70.87    3.87
   0 -18  -2   65.25    4.23
   0 -18   3    2.93    1.12
   0 -18   3    3.25    0.88
   0 -18  -3    2.53    0.91
   0 -18  -3    3.31    0.81
   0 -18  -4   38.95    2.50
   0 -18   4   38.44    3.72
   0 -18   4   38.06    2.95
   0 -18  -4   35.86    2.99
   0 -18  -5   22.72    2.32
   0 -18   5   22.99    2.37
   0 -18   5   25.21    3.03
   0 -18   6  123.46    5.45
   0 -18  -6  111.45    4.89
   0 -18   6  126.81    6.69
   0 -18   7    2.29    0.90
   0 -18   7    2.10    1.07
   0 -18  -7    2.37    0.79
   0 -18   8    0.09    0.37
   0 -18   8   -0.25    0.53
   0 -18  -8    0.26    0.30
   0 -18   9   26.93    2.67
   0 -18   9   29.74    3.36
   0 -18  10   49.99    3.72
   0 -18  10   52.20    4.31
   0  18  11   53.40    3.17
   0 -18  11   65.75    4.84
   0 -18  11   62.87    4.17
   0 -18  12   20.58    2.44
   0  18  12   19.25    1.92
   0 -18  12   20.00    2.75
   0 -18  13   19.35    2.35
   0  18  13   19.86    1.93
   0 -18  13   19.77    2.68
   0 -18  14   11.57    2.06
   0  18  14   11.91    1.51
   0 -18  14   12.85    1.99
   0 -18  15   76.91    4.73
   0 -18  15   80.08    5.08
   0  18  15   75.00    3.71
   0  18  16    0.22    0.48
   0 -18  16    1.45    0.83
   0 -18  16    1.51    0.96
   0  18  16    0.78    0.51
   0 -18  17   80.84    4.93
   0  18  17   72.17    3.58
   0 -18  17   78.84    4.69
   0  18  17   72.42    3.84
   0 -18  18   27.28    2.87
   0  18  18   28.37    2.22
   0  18  18   24.68    2.29
   0 -18  18   28.82    2.86
   0 -18  19    2.46    0.81
   0 -18  19    6.68    1.47
   0  18  19    3.16    0.80
   0  18  19    6.26    1.03
   0 -18  20   17.82    2.11
   0  18  20   15.41    1.75
   0 -18  20   21.51    2.37
   0  18  20   20.34    1.83
   0  18  21    2.87    0.85
   0 -18  21    4.71    1.24
   0 -18  21    4.89    1.13
   0  18  21    6.66    1.08
   0  18  22  147.03    4.77
   0 -18  22  133.12    5.38
   0  18  22  125.97    4.83
   0 -18  22  137.44    5.72
   0 -18  23    7.11    1.26
   0 -18  23    8.54    1.32
   0  18  23    7.51    1.09
   0  18  23    4.34    0.97
   0  18  24    1.16    0.45
   0 -18  24    0.55    0.31
   0  18  24    1.66    0.47
   0 -18  24    1.69    0.81
   0 -18  25    0.97    0.67
   0  18  25    0.83    0.54
   0  18  25    0.74    0.40
   0 -18  25    1.63    0.60
   0  18  26  161.15    4.58
   0  18  26  145.93    4.78
   0 -18  26  156.04    5.34
   0 -18  26  145.05    4.49
   0 -18  27    1.83    0.54
   0 -18  27    2.00    0.44
   0  18  27    1.67    0.47
   0  18  27    3.46    0.71
   0 -18  28   -0.09    0.21
   0 -18  28    0.65    0.36
   0  18  28    0.30    0.33
   0  18  28   -0.39    0.28
   0  18  29    1.73    0.51
   0  18  29    1.57    0.52
   0 -18  29    1.70    0.52
   0  18  30   47.53    2.17
   0 -18  30   43.88    2.19
   0  18  31    0.56    0.32
   0  18  31    1.14    0.43
   0 -18  31    0.65    0.30
   0  18  32    0.97    0.29
   0  18  32    0.96    0.33
   0  18  33    9.48    0.82
   0 -20   0    2.24    0.68
   0 -20   0    1.73    0.49
   0 -20  -1   17.62    1.50
   0 -20   1   15.42    1.88
   0 -20  -1   14.19    1.71
   0 -20   1   16.82    1.58
   0 -20  -2   12.44    1.25
   0 -20   2   14.71    1.50
   0 -20  -2   11.81    1.51
   0 -20   2   12.82    1.78
   0 -20  -3   16.52    1.72
   0 -20   3   17.09    1.63
   0 -20   3   18.96    2.16
   0 -20  -4    7.79    1.18
   0 -20   4   10.62    1.34
   0 -20   4    8.96    1.65
   0 -20   5  163.47    5.29
   0 -20   5  164.94    6.47
   0 -20   6   31.87    2.89
   0 -20  -6   25.68    1.89
   0 -20   6   31.85    2.40
   0 -20   7   12.83    1.55
   0 -20   7    9.76    1.71
   0 -20   8    1.52    0.72
   0 -20   8    0.99    0.82
   0 -20   9   19.76    2.30
   0  20   9   17.83    1.44
   0 -20   9   18.69    1.90
   0 -20  10    7.56    1.39
   0  20  10    7.09    0.94
   0 -20  10    9.03    1.40
   0  20  11    0.49    0.23
   0 -20  11    2.58    0.83
   0 -20  11    2.69    0.93
   0 -20  12    8.89    1.53
   0 -20  12    9.32    1.42
   0  20  12    8.46    0.99
   0 -20  13    3.12    0.85
   0  20  13    2.26    0.56
   0 -20  13    3.39    0.93
   0  20  14    1.54    0.44
   0 -20  14    2.91    0.83
   0 -20  14    2.78    0.79
   0 -20  15   94.90    4.54
   0 -20  15  101.07    4.46
   0 -20  16   15.69    1.79
   0  20  16   14.39    1.28
   0 -20  16   18.13    1.90
   0 -20  17    9.06    1.38
   0  20  17    7.36    0.91
   0 -20  17    8.24    1.28
   0 -20  18   13.41    1.58
   0 -20  18   13.07    1.56
   0  20  18   11.09    1.08
   0  20  19    2.55    0.55
   0 -20  19    3.26    0.76
   0 -20  19    2.82    0.69
   0  20  20    5.12    0.73
   0 -20  20    6.37    1.03
   0 -20  20    6.16    1.02
   0  20  21   36.23    1.85
   0 -20  21   38.08    2.28
   0 -20  22   62.39    2.71
   0 -20  22   66.37    3.03
   0  20  22   57.69    2.25
   0 -20  23   30.12    1.96
   0  20  23   26.93    1.46
   0 -20  23   26.71    1.66
   0 -20  24    0.64    0.26
   0  20  24    0.67    0.17
   0 -20  24    0.70    0.31
   0 -20  25   96.17    3.09
   0  20  25   79.09    2.28
   0 -20  26   17.65    1.22
   0 -22   0    3.14    0.60
   0 -22  -1    5.99    0.72
   0 -22   1    6.54    0.86
   0 -22   2    5.44    0.81
   0 -22  -2    4.80    0.61
   0 -22   3   24.34    1.70
   0 -22   4    8.97    1.10
   0 -22   5  176.68    3.73
   0 -22   5  151.59    4.37
   0 -22   6   15.94    1.48
   0 -22   6   18.92    1.28
   0 -22   7    0.85    0.26
   0 -22   7    1.27    0.48
   0 -22   8    4.39    0.67
   0 -22   8    3.55    0.78
   0 -22   9   65.48    2.88
   0 -22   9   70.53    2.55
   0 -22  10    1.91    0.45
   0 -22  10    2.16    0.61
   0 -22  11   21.65    1.42
   0 -22  11   18.63    1.45
   0 -22  12    8.08    0.88
   0 -22  12    6.84    0.96
   0 -22  13    1.56    0.42
   0 -22  13    0.70    0.30
   0 -22  14    1.85    0.47
  -1   1  55    1.48    0.36
  -1   1  54    9.75    0.98
  -1  -1  54    9.12    0.94
  -1  -1  53    3.02    0.63
  -1   1  53    3.21    0.65
  -1  -1  52    0.47    0.23
  -1  -1  52    0.29    0.22
  -1   1  52    0.32    0.40
  -1  -1  51    4.18    0.63
  -1  -1  51    4.05    0.80
  -1   1  51    3.85    0.77
  -1  -1  50  144.47    3.96
  -1  -1  50  149.79    4.90
  -1   1  50  153.38    4.99
  -1  -1  49   28.51    2.24
  -1   1  49   30.45    2.38
  -1   1  49   27.92    1.82
  -1  -1  49   28.63    1.88
  -1  -1  48   15.67    1.47
  -1  -1  48   14.32    1.70
  -1   1  48   14.57    1.71
  -1   1  48   14.14    1.43
  -1   1  47    0.92    0.51
  -1   1  47    0.03    0.26
  -1   1  47    0.77    0.37
  -1  -1  47    0.86    0.52
  -1  -1  47    0.80    0.56
  -1  -1  46  105.58    4.83
  -1   1  46   99.06    4.08
  -1   1  46  112.18    4.98
  -1   1  46   99.13    4.39
  -1   1  46  105.61    3.91
  -1  -1  46  101.31    4.03
  -1   1  45   28.49    2.60
  -1   1  45   25.21    2.33
  -1  -1  45   28.72    2.63
  -1   1  45   29.90    2.17
  -1  -1  45   27.59    2.20
  -1   1  45   27.83    2.24
  -1  -1  44   12.06    1.53
  -1  -1  44   12.30    1.77
  -1   1  44   11.93    1.42
  -1   1  44   12.51    1.77
  -1   1  44   11.49    1.63
  -1   1  44   10.77    1.48
  -1  -1  43    1.45    0.80
  -1  -1  43   -0.10    0.28
  -1   1  43   -0.02    0.40
  -1   1  43    0.28    0.26
  -1   1  43    0.52    0.72
  -1   1  43    1.33    0.59
  -1  -1  42   19.05    2.29
  -1   1  42   18.49    2.22
  -1   1  42   19.19    1.88
  -1  -1  42   20.24    2.03
  -1   1  42   18.14    1.99
  -1   1  42   16.65    2.09
  -1   1  41    4.79    1.18
  -1   1  41    7.23    1.23
  -1   1  41    6.05    1.21
  -1   1  41    4.56    1.11
  -1  -1  41    5.86    1.31
  -1  -1  41    6.58    1.20
  -1   1  40    1.24    0.73
  -1  -1  40    1.65    0.90
  -1   1  40    1.11    0.32
  -1   1  40    0.98    0.56
  -1  -1  40    1.60    0.70
  -1   1  40    0.29    0.68
  -1  -1  39    1.64    0.82
  -1   1  39    1.85    0.94
  -1  -1  39    1.54    0.76
  -1   1  39    1.52    0.52
  -1   1  39    0.96    0.49
  -1   1  39    1.63    0.88
   1  -1 -38  303.84   14.94
  -1  -1  38  349.76   19.74
   1   1 -38  309.91   14.98
   1   1 -38  275.02   12.28
  -1  -1  38  305.34    8.17
  -1   1  38  303.11    8.27
  -1   1  38  319.80    9.00
  -1  -1  38  313.81    8.01
  -1   1  38  351.01   19.07
  -1  -1  38  313.66    9.06
  -1   1  38  320.43    9.61
   1  -1 -38  272.48   12.87
  -1   1  38  324.20    7.79
  -1   1  37    1.74    0.93
  -1   1  37    1.09    0.65
  -1  -1  37    1.16    0.68
  -1  -1  37    0.49    0.38
   1   1 -37    1.08    0.90
  -1  -1  37    0.24    0.37
   1  -1 -37    2.12    1.30
   1   1 -37    1.20    0.77
  -1  -1  37    0.21    0.87
  -1   1  37    2.80    1.77
  -1   1  37    0.39    0.40
   1  -1 -37    1.10    1.01
  -1   1  37    1.07    0.65
  -1  -1  36    5.68    2.40
  -1  -1  36    4.46    1.12
  -1  -1  36    4.76    0.98
  -1  -1  36    5.03    1.29
  -1   1  36    6.69    2.86
  -1   1  36    3.66    0.97
   1  -1 -36    3.76    1.41
   1  -1 -36    2.82    1.35
   1   1 -36    4.00    1.62
  -1   1  36    3.67    1.08
  -1   1  36    3.45    1.01
   1   1 -36    2.94    1.16
  -1   1  36    3.93    0.92
  -1  -1  35    0.45    0.41
  -1   1  35    0.31    0.36
  -1   1  35    0.96    0.55
  -1   1  35   -0.32    0.36
  -1   1  35   -0.77    0.71
  -1   1  35    0.91    1.19
   1   1 -35   -1.53    0.91
   1  -1 -35   -0.84    0.99
  -1  -1  35    0.69    0.61
  -1  -1  35    1.48    1.31
   1  -1 -35    0.78    0.84
  -1  -1  35    0.38    0.43
   1   1 -35    0.49    0.54
  -1   1  34   48.73    3.44
  -1   1  34   66.06    8.03
  -1   1  34   49.99    3.07
   1  -1 -34   36.73    4.48
   1   1 -34   42.17    4.55
  -1  -1  34   62.43    8.16
  -1  -1  34   57.43    6.73
   1  -1 -34   42.49    5.24
   1   1 -34   43.85    5.39
  -1  -1  34   48.52    3.21
  -1  -1  34   46.62    3.68
  -1   1  34   45.20    3.62
  -1   1  34   46.60    3.20
  -1  -1  34   51.12    3.18
  -1  -1  34   48.18    3.55
  -1  -1  33  149.35    5.40
   1   1 -33  127.14    7.81
   1  -1 -33  122.89    8.07
  -1  -1  33  171.34   11.54
  -1  -1  33  148.13    5.96
  -1   1  33  143.87    5.53
  -1  -1  33  188.36   13.66
   1   1 -33  135.29    9.23
  -1   1  33  138.26    6.25
  -1   1  33  148.52    5.87
   1  -1 -33  133.10    9.20
  -1   1  33  152.32    5.20
  -1   1  33  190.96   13.48
  -1  -1  32   20.44    3.84
  -1   1  32   16.46    1.97
   1   1 -32   16.94    2.77
   1   1 -32   16.82    3.23
  -1  -1  32   23.63    4.74
   1  -1 -32   17.91    3.37
  -1   1  32   23.26    4.80
  -1  -1  32   15.58    1.95
   1  -1 -32   14.38    2.70
   1  -1 -31   38.85    4.35
   1   1 -31   39.41    4.18
  -1  -1  31   34.07    4.97
  -1   1  31   36.53    4.77
  -1  -1  31   41.32    6.44
  -1   1  31   42.33    6.17
   1  -1 -31   43.52    5.09
   1   1 -31   43.84    5.12
  -1   1  30  972.07   28.71
   1   1 -30  885.04   22.52
  -1  -1  30  957.02   29.69
  -1  -1  30  824.36   24.22
   1   1 -30  817.99   18.46
   1  -1 -30  837.22   21.69
  -1   1  30  818.02   22.07
   1  -1 -30  804.93   19.52
   1  -1 -29   98.62    6.73
   1   1 -29  105.68    6.51
  -1  -1  29  112.69    8.77
  -1   1  29  137.03   10.70
  -1   1  29  121.92    8.35
   1   1 -29  104.36    7.62
   1  -1 -29  110.08    7.72
  -1  -1  29  131.65   10.84
   1   1 -28    2.50    1.23
  -1  -1  28    5.81    2.09
   1  -1 -28    2.93    1.25
  -1  -1  28    4.98    2.00
  -1   1  28    3.01    1.71
   1   1 -28    2.53    0.97
  -1   1  28    3.97    1.40
   1  -1 -28    2.47    1.16
   1  -1 -27    1.79    0.96
   1   1 -27    1.96    0.92
  -1  -1  27    5.06    1.78
   1   1 -27    1.07    0.58
  -1   1  27    6.30    1.93
   1  -1 -27    1.55    1.00
  -1  -1  27    5.67    2.17
   1   1 -26   35.91    3.57
   1  -1 -26   34.03    3.73
   1   1 -26   35.02    4.17
  -1  -1  26   68.64    7.39
  -1   1  26   59.55    5.56
  -1  -1  26   56.50    5.89
  -1  -1  26   63.24    4.73
   1  -1 -26   33.45    4.07
  -1  -1  25    2.94    1.48
  -1   1  25    3.00    1.38
   1   1 -25    2.34    0.99
   1  -1 -25    1.88    0.85
  -1  -1  25    3.13    1.09
   1   1 -25    1.74    0.94
  -1  -1  25    2.58    1.49
   1  -1 -25    0.87    0.73
   1   1 -24    1.31    0.73
  -1  -1  24    1.96    1.03
   1   1 -24    1.07    0.78
  -1  -1  24    1.86    0.91
  -1  -1  24    2.06    1.28
   1  -1 -24    1.30    1.02
  -1   1  24    0.67    0.75
   1  -1 -24    0.76    0.71
   1   1 -23    9.05    1.69
  -1   1  23    9.85    1.47
  -1  -1  23    8.19    2.51
   1   1 -23    7.89    1.87
  -1  -1  23    8.82    1.70
   1  -1 -23    8.38    1.70
  -1   1  23    7.65    2.11
   1  -1 -23    7.82    1.85
  -1  -1  23    8.68    2.27
   1  -1 -22  277.49   10.54
  -1  -1  22  314.30    9.69
  -1  -1  22  339.16   14.65
   1   1 -22  289.22   10.76
   1  -1 -22  271.53    7.69
   1   1 -22  288.10    9.23
  -1  -1  22  276.20   11.85
  -1   1  22  312.39    8.06
  -1   1  22  271.88    8.35
   1  -1 -22  286.05    9.81
   1   1 -21   35.61    3.67
  -1  -1  21   44.46    3.59
  -1   1  21   47.37    3.08
   1   1 -21   38.56    3.36
  -1   1  21   38.61    3.16
   1   1 -21   34.68    2.19
   1  -1 -21   34.43    3.65
  -1  -1  21   47.18    5.44
  -1  -1  21   40.54    4.48
   1  -1 -21   33.56    3.37
   1  -1 -21   34.18    2.69
   1   1 -20   23.56    2.63
  -1  -1  20   27.44    3.62
  -1   1  20   28.68    2.35
   1  -1 -20   22.43    2.16
   1   1 -20   24.07    3.01
   1  -1 -20   24.97    2.87
  -1  -1  20   30.89    4.30
  -1   1  20   23.99    2.47
   1  -1 -20   24.11    3.03
  -1  -1  20   27.76    2.79
   1   1 -20   24.61    1.81
  -1   1  19    0.65    0.53
  -1   1  19    1.18    0.58
   1  -1 -19    2.80    0.86
   1  -1 -19    2.93    1.28
  -1  -1  19    0.80    0.61
   1   1 -19    2.87    1.03
   1   1 -19    2.47    0.86
   1  -1 -19    2.63    1.04
  -1  -1  19    0.79    0.50
  -1  -1  19    0.37    0.63
   1   1 -19    3.22    0.62
  -1  -1  18 1974.77   31.40
  -1  -1  18 1804.95   21.26
  -1   1  18 1830.41   17.55
   1   1 -18 1947.16   25.27
  -1  -1  18 1608.17   26.20
  -1   1  18 1614.79   19.63
   1   1 -18 1952.62   15.41
   1  -1 -18 1934.79   23.73
   1   1 -18 1925.05   21.84
   1  -1 -18 1879.79   24.95
   1  -1 -18 1900.80   19.09
   1   1 -17  181.35    4.57
   1  -1 -17  178.28    7.55
  -1  -1  17  194.76    8.95
   1  -1 -17  189.64    7.33
   1   1 -17  189.63    6.70
  -1  -1  17  221.27    7.31
  -1   1  17  220.65    5.89
   1  -1 -17  181.19    5.80
   1   1 -17  178.48    7.56
  -1   1  17  196.27    6.76
  -1  -1  17  224.03   10.44
   1   1 -16  171.45    6.20
  -1  -1  16  206.04    6.81
   1  -1 -16  153.32    6.84
   1   1 -16  150.74    6.80
   1  -1 -16  161.61    6.64
  -1  -1  16  227.15   10.05
  -1  -1  16  174.56    5.93
  -1   1  16  194.47    6.63
  -1   1  16  208.86    5.53
   1   1 -16  157.05    4.13
   1  -1 -16  158.31    5.35
   1  -1 -15  160.32    6.40
  -1   1  15  158.68    5.92
   1   1 -15  150.15    6.58
   1  -1 -15  147.99    6.52
  -1  -1  15  166.27    5.94
   1   1 -15  153.61    5.70
   1   1 -15  154.83    3.96
  -1  -1  15  178.16    8.61
  -1   1  15  163.67    4.72
   1  -1 -15  152.81    5.14
  -1  -1  15  135.76    5.16
  -1  -1  14 1444.89   23.43
   1  -1 -14 1582.04   16.22
   1  -1 -14 1606.39   19.96
   1  -1 -14 1560.19   20.63
   1   1 -14 1566.90   20.39
   1   1 -14 1605.15   17.79
   1   1 -14 1600.70   12.28
   1  -1 -13    9.51    1.52
   1   1 -13    8.87    1.56
  -1   1  13    8.16    1.31
  -1  -1  13    8.07    1.29
   1  -1 -13    7.96    1.52
   1  -1 -13    9.19    1.26
  -1  -1  13    8.28    1.81
  -1  -1  13    6.98    1.14
   1   1 -13    8.22    0.86
  -1   1  13    7.78    0.95
   1   1 -13    6.75    1.21
   1   1 -12    7.07    1.38
  -1   1  12    4.60    1.03
  -1  -1  12    6.76    1.61
   1  -1 -12    6.61    1.06
  -1  -1  12    4.78    0.97
   1   1 -12    7.17    0.78
  -1  -1  12    3.63    0.81
   1  -1 -12    7.29    1.31
   1  -1 -12    7.40    1.40
  -1   1  12    5.04    0.73
   1   1 -12    6.72    1.15
  -1  -1  11  219.85    6.00
  -1  -1  11  257.41    8.74
   1  -1 -11  255.66    6.01
  -1  -1  11  211.25    5.84
   1   1 -11  246.27    6.27
   1   1 -11  251.29    7.39
  -1   1  11  219.40    4.43
   1   1 -11  249.43    4.21
   1  -1 -11  261.61    7.29
  -1   1  11  231.73    6.54
   1   1 -10  844.81   12.95
   1  -1 -10  875.92   12.66
   1   1 -10  800.22   10.77
   1   1 -10  836.32    7.13
  -1  -1  10  763.78   13.93
   1  -1 -10  847.25   10.58
  -1   1  10  715.66   11.12
  -1  -1  10  691.47   10.17
   1   1  -9  731.39    9.79
  -1  -1   9  624.29    9.40
   1  -1  -9  756.04   11.84
   1  -1  -9  805.62   11.64
   1  -1  -9  759.98    9.65
  -1   1   9  701.94   10.66
   1   1  -9  755.06    6.19
  -1  -1   9  661.53    9.51
  -1  -1   9  764.13   12.88
   1   1  -9  748.26   11.64
  -1   1   9  657.87    6.59
   1   1  -8   43.36    2.63
   1  -1  -8   45.74    2.66
   1  -1  -8   45.15    2.26
   1   1  -8   43.30    2.26
  -1   1   8   34.40    2.31
  -1  -1   8   27.89    1.86
  -1  -1   8   36.57    2.64
   1   1  -8   45.20    1.35
  -1  -1   8   28.16    1.93
   1  -1  -8   45.08    2.75
  -1   1   8   27.70    1.23
  -1  -1   7   33.01    1.91
  -1  -1   7   32.98    1.88
   1  -1  -7   33.74    1.87
   1   1  -7   32.86    2.15
   1   1  -7   33.02    1.87
   1  -1  -7   34.21    2.19
  -1   1   7   28.69    1.08
  -1  -1   7   38.11    2.48
  -1   1   7   33.75    2.16
   1  -1  -7   31.72    2.17
   1   1  -7   30.85    0.97
  -1  -1   7   30.56    1.89
  -1   1   6  279.48    5.90
   1  -1  -6  453.74    7.61
   1   1  -6  413.64    6.04
   1   1  -6  463.22    7.51
   1  -1  -6  453.38    7.52
  -1  -1   6  287.09    6.29
   1   1  -5    0.48    0.12
   1  -1  -5    0.39    0.21
   1   1  -5    1.51    0.35
  -1  -1   5    0.19    0.20
   1  -1  -5    1.23    0.36
  -1  -1   5    0.34    0.23
  -1  -1   5    0.29    0.11
  -1  -1   5    0.28    0.12
   1  -1  -5    2.21    0.52
  -1   1   5    0.76    0.39
  -1  -1   5    0.56    0.27
   1   1  -5    1.55    0.42
  -1  -1   4    8.55    0.84
   1  -1  -4   10.93    0.88
  -1  -1   4    9.82    0.54
   1   1  -4   10.30    0.49
  -1  -1   4    9.19    0.85
   1  -1  -4    4.13    0.62
  -1   1   4    9.05    0.96
  -1  -1   4    8.15    0.82
   1   1  -4    5.21    0.52
   1   1  -4    4.48    0.65
  -1  -1   4    9.52    0.72
  -1  -1   3   41.27    1.55
   1   1  -3   55.56    1.35
   1   1  -3   58.25    2.00
  -1  -1   3   40.02    1.69
  -1  -1   3   35.70    1.60
   1  -1  -3   60.27    2.11
   1  -1  -3   35.75    1.52
  -1  -1   3   38.38    1.22
   1   1  -3   37.38    0.99
   1   1  -2 5356.47   16.67
   1  -1  -2 5166.32   17.11
   1  -1  -1  914.64    6.72
   1  -1  -1  866.50    6.77
  -1  -1   1  902.19    5.80
  -1  -1   1  889.81    6.11
   1   1  -1  930.13    6.48
   1  -1   0  297.21    3.99
   1   1   0  331.68    3.78
   1  -1   0  318.65    3.93
   1  -1   0  302.18    3.83
  -1  -1   0  313.70    4.12
  -1   1   0  306.34    4.44
   1  -1   0  305.30    3.73
   1  -1   0  331.26    3.93
   1  -1   1  347.83    4.75
  -1  -1  -1  358.62    4.84
  -1  -1  -1  355.43    3.99
   1  -1   1  343.23    4.06
   1  -1   1  335.28    4.05
   1  -1   1  334.64    4.11
  -1   1  -1  349.74    4.39
  -1  -1  -2 2587.54   12.91
   1  -1   2 2551.63   12.45
   1  -1   2 2515.83   11.03
  -1   1  -2 2476.33   10.74
   1  -1   2 2473.33   11.74
   1  -1   3   12.75    0.81
   1  -1   3   11.47    0.93
   1  -1   3   11.90    0.96
   1  -1   4    2.30    0.50
   1  -1   4    3.81    0.57
  -1  -1  -4    2.99    0.58
   1  -1   4    2.83    0.40
   1  -1   5  232.28    5.23
  -1   1  -5  235.16    4.06
   1  -1   5  233.07    4.66
  -1  -1  -5  222.98    4.98
   1   1   5  216.84    2.88
  -1  -1  -5  218.31    5.03
  -1  -1  -6 2075.86   15.78
  -1   1  -6 2227.31   13.07
   1  -1   6 2008.58   11.80
  -1  -1  -6 2080.24   16.50
   1   1   7    1.15    0.58
   1  -1   7    2.43    0.64
  -1   1  -7    1.12    0.37
   1   1   7    2.23    0.47
   1   1   7    1.58    0.31
  -1  -1  -7    0.71    0.34
   1  -1   7    1.44    0.45
   1   1   8   44.60    2.08
   1   1   8   45.59    1.70
   1  -1   8   46.55    2.69
  -1  -1  -8   40.80    2.37
  -1   1  -8   41.25    2.23
   1   1   8   39.81    2.89
   1  -1   8   46.19    2.58
  -1   1  -8   40.39    1.90
   1  -1   9   72.19    3.50
  -1   1  -9   70.25    2.61
  -1   1  -9   71.32    3.12
  -1  -1  -9   67.54    3.14
   1  -1   9   65.12    3.25
   1   1   9   67.50    2.22
   1   1   9   65.72    2.74
  -1  -1 -10  774.01   10.88
   1   1  10  708.09    9.66
   1  -1  10  731.43   11.56
   1   1  10  757.81    7.93
  -1   1 -10  800.20   10.95
   1  -1  10  806.09   12.11
  -1   1 -10  807.69    9.12
   1   1  11  505.98    8.72
   1  -1  11  495.46    9.99
  -1   1 -11  498.08    7.41
  -1  -1 -11  481.95    8.77
   1   1  11  521.34    6.99
   1   1  11  538.77    8.82
  -1   1 -11  491.69    8.97
  -1   1 -12   31.80    2.42
  -1   1 -12   30.48    1.93
   1   1  12   30.64    2.23
   1   1  12   30.22    2.29
   1   1  12   33.01    1.85
   1  -1  12   31.05    2.54
  -1  -1 -12   32.76    2.38
   1  -1  12   29.30    2.60
   1  -1  13   20.44    2.32
   1   1  13   17.81    1.39
   1  -1  13   19.37    2.05
  -1  -1 -13    8.73    1.46
   1  -1  13   17.95    2.77
  -1   1 -13    7.46    1.31
  -1  -1 -13    6.89    1.16
  -1   1 -13    8.42    1.07
   1   1  13   22.20    2.08
   1   1  13   19.89    1.85
   1  -1  14 2209.55   30.11
  -1  -1 -14 2365.03   20.79
  -1   1 -14 2370.82   18.21
  -1  -1 -14 2371.83   23.80
   1  -1  14 2193.38   22.20
  -1   1 -14 2313.17   22.26
   1  -1  15   47.94    3.75
  -1   1 -15   45.36    2.59
  -1  -1 -15   47.11    3.48
   1   1  15   45.91    3.23
  -1  -1 -15   44.91    2.94
   1  -1  15   53.75    4.98
   1  -1  15   51.59    3.52
  -1   1 -15   43.48    3.18
   1   1  15   51.52    3.13
   1   1  15   42.59    2.24
  -1   1 -16   81.88    4.94
  -1   1 -16   80.67    4.43
   1   1  16   79.63    4.40
   1  -1  16   84.78    5.19
   1  -1  16   86.18    6.53
  -1  -1 -16   84.31    4.12
  -1  -1 -16   80.11    4.99
  -1  -1 -16   88.84    4.85
  -1   1 -16   80.65    3.51
   1   1  16   74.69    2.97
   1  -1  16   88.91    4.73
   1   1  16   91.97    4.27
  -1  -1 -17  151.26    6.52
  -1   1 -17  138.66    4.67
  -1  -1 -17  146.14    5.52
  -1  -1 -17  135.72    6.66
  -1   1 -17  133.18    6.56
   1  -1  17  144.80    7.02
   1   1  17  164.91    5.86
   1  -1  17  161.63    9.17
   1   1  17  127.42    3.87
   1   1  17  136.67    5.97
  -1   1 -17  143.57    5.99
   1  -1  17  162.16    6.51
  -1   1 -18 3350.97   33.71
  -1   1 -18 3129.06   28.95
   1  -1  18 3105.77   29.12
  -1   1 -18 3260.51   23.06
  -1  -1 -18 3281.66   26.70
   1   1  18 3202.81   26.45
   1  -1  18 3162.03   41.71
  -1  -1 -18 3277.41   33.27
  -1  -1 -18 3312.91   31.13
  -1  -1 -19    4.35    1.26
  -1  -1 -19    3.52    1.11
   1  -1  19    1.37    0.71
  -1  -1 -19    4.34    0.98
   1   1  19    1.67    0.92
   1   1  19    1.52    0.62
  -1   1 -19    4.08    0.84
  -1   1 -19    3.87    1.07
  -1   1 -19    5.73    1.52
   1  -1  19    0.82    0.68
   1  -1  19    1.92    1.30
   1  -1  20   13.37    2.93
  -1   1 -20   13.76    2.01
  -1  -1 -20   13.71    1.77
   1   1  20   15.74    1.94
   1   1  20   11.00    1.83
  -1  -1 -20   13.30    2.06
   1  -1  20   14.77    2.11
  -1   1 -20   13.39    2.27
  -1   1 -20   12.25    1.50
  -1  -1 -20   14.73    2.41
   1  -1  20   11.27    2.20
  -1  -1 -21   32.49    2.79
   1  -1  21   35.93    4.88
  -1   1 -21   34.71    3.74
  -1   1 -21   31.55    3.11
  -1  -1 -21   32.59    3.59
   1   1  21   27.22    3.06
   1  -1  21   37.57    3.42
   1   1  21   35.84    2.97
  -1   1 -21   33.35    2.50
   1  -1  21   31.78    3.77
  -1  -1 -21   32.91    3.32
   1  -1  22  363.86   13.12
  -1  -1 -22  459.04   13.73
  -1  -1 -22  459.48   10.64
   1   1  22  343.36   11.16
  -1  -1 -22  454.14   12.51
  -1   1 -22  481.93   14.16
   1  -1  22  429.51   17.34
   1   1  22  443.76   10.65
  -1   1 -22  445.55   11.92
   1  -1  22  429.95   11.80
  -1   1 -22  479.32    9.66
   1  -1  23    6.81    1.73
  -1   1 -23   10.87    1.48
   1   1  23    5.06    1.41
  -1  -1 -23    9.18    1.53
   1  -1  23    7.62    1.65
  -1  -1 -23    9.73    1.89
  -1   1 -23   10.65    2.10
   1  -1  23    6.01    2.08
  -1   1 -23    9.14    1.79
  -1  -1 -23   11.19    2.26
   1   1  23    5.88    1.30
  -1  -1 -24    6.19    1.68
  -1  -1 -24    4.52    1.19
  -1   1 -24    5.23    1.42
   1  -1  24    7.10    2.44
   1  -1  24    5.98    1.70
   1  -1  24    6.97    1.62
   1   1  24    5.35    1.25
  -1   1 -24    3.90    0.94
  -1   1 -24    4.71    1.59
   1   1  24    4.97    1.53
  -1  -1 -24    4.76    1.35
   1  -1  25   -0.08    0.73
  -1  -1 -25    0.46    0.66
   1   1  25    0.10    0.50
  -1   1 -25    0.46    0.65
  -1   1 -25    0.21    0.34
  -1  -1 -25    0.02    0.31
   1  -1  25    0.46    0.86
   1  -1  25    0.74    0.78
  -1  -1 -25    0.13    0.25
   1   1  25    0.41    0.55
   1   1  26   21.83    3.20
  -1   1 -26   43.59    4.61
  -1  -1 -26   45.46    4.64
   1  -1  26   27.29    4.86
  -1   1 -26   41.27    3.94
  -1  -1 -26   41.56    3.41
  -1  -1 -26   40.85    3.98
   1  -1  26   25.21    3.11
   1   1  26   27.61    2.90
   1  -1  26   23.38    3.62
   1   1  27    4.31    1.41
  -1   1 -27    8.02    1.73
  -1  -1 -27    9.15    1.97
  -1  -1 -27    8.73    2.14
   1  -1  27    6.54    1.73
   1  -1  27    5.32    1.86
  -1  -1 -27    9.50    1.67
   1   1  27    7.05    2.42
  -1   1 -27    9.53    2.22
   1  -1  27    7.66    2.71
   1   1  28   -0.38    0.79
  -1  -1 -28    0.03    0.63
  -1   1 -28    0.40    0.72
   1  -1  28    0.47    1.09
   1  -1  28    0.10    0.36
  -1  -1 -28    0.80    0.42
   1  -1  28    0.03    0.68
  -1  -1 -28    0.20    0.34
  -1   1 -28    0.87    0.78
  -1  -1 -29  110.95    7.03
  -1   1 -29  109.09    6.76
   1   1  29  130.05   10.80
   1  -1  29  109.21    8.36
   1  -1  29  129.32    7.30
  -1   1 -29  114.57    7.88
   1  -1  29  129.26   11.13
  -1  -1 -29  119.88    7.96
  -1   1 -30  291.31   11.18
   1  -1  30  286.81   16.96
   1  -1  30  239.96   12.72
  -1   1 -30  333.13   13.58
  -1  -1 -30  290.23   11.44
  -1  -1 -30  319.15   13.27
   1   1  30  285.23   16.29
  -1   1 -31   62.64    6.08
  -1  -1 -31   61.09    5.95
   1  -1  31   65.14    8.17
  -1   1 -31   56.69    5.00
   1  -1  31   55.64    6.17
  -1  -1 -31   54.15    5.13
   1   1  31   70.96    8.39
   1  -1  32    8.06    3.05
  -1  -1 -32    5.30    1.84
  -1  -1 -32    5.87    1.62
  -1   1 -32    4.97    1.53
  -1   1 -32    5.01    1.81
   1   1  32    6.56    2.61
   1  -1  32    6.44    1.15
   1  -1  32    6.60    1.09
   1  -1  32    5.21    1.06
   1   1  32    6.47    1.25
   1   1  33   10.52    3.20
  -1  -1 -33   10.47    2.40
  -1   1 -33    8.79    2.29
   1   1  33   10.00    1.32
   1  -1  33    9.74    1.34
   1   1  33    9.18    1.41
  -1   1 -33    8.94    2.06
  -1  -1 -33    8.89    2.28
   1  -1  33   11.19    3.62
   1  -1  33    8.11    1.38
   1   1  33    9.19    1.36
  -1   1 -34  145.28    8.41
  -1  -1 -34  141.98    9.54
   1  -1  34  189.26   14.63
  -1   1 -34  153.27    9.92
   1  -1  34  157.27    6.05
   1   1  34  195.54   14.49
   1   1  34  160.44    5.67
   1   1  34  166.11    5.36
  -1  -1 -34  140.61    8.65
   1  -1  34  163.33    5.55
   1   1  34  161.89    6.03
   1   1  35   -0.06    1.44
   1  -1  35    0.35    0.45
  -1  -1 -35   -0.09    0.61
  -1   1 -35    0.76    0.56
   1  -1  35    0.28    0.35
   1   1  35   -0.09    0.44
   1  -1  35    3.38    2.10
  -1  -1 -35    0.53    0.81
   1   1  35    0.12    0.32
  -1   1 -35    1.47    1.28
   1   1  35    0.64    0.51
   1  -1  36   13.84    4.12
   1   1  36   16.36    4.32
  -1   1 -36   15.17    2.84
   1   1  36   14.55    1.68
  -1   1 -36   15.84    3.41
   1   1  36   14.98    1.86
   1   1  36   13.73    1.72
  -1  -1 -36   15.72    3.22
   1  -1  36   15.10    1.76
  -1  -1 -36   15.30    3.02
   1  -1  36   15.07    1.91
  -1   1 -37   12.99    2.68
   1  -1  37   14.22    1.85
  -1  -1 -37   15.22    3.22
   1   1  37   14.86    1.92
   1   1  37   16.62    4.46
  -1   1 -37   16.03    3.34
   1  -1  37   16.48    4.37
   1   1  37   14.79    1.76
   1  -1  37   15.87    1.81
   1   1  37   14.69    1.65
  -1  -1 -37   12.41    2.73
   1   1  38  128.51    5.52
   1  -1  38  131.11    5.66
  -1   1 -38  111.72    7.90
   1  -1  38  130.63    5.09
   1  -1  38  139.06   13.00
  -1   1 -38  128.19    9.61
   1   1  38  130.55    4.91
   1   1  38  150.63   13.07
  -1  -1 -38  101.80    7.78
   1   1  38  121.88    5.07
  -1  -1 -38  130.91    9.62
   1   1  39   27.98    2.46
   1   1  39   27.75    2.62
   1  -1  39   30.55    2.52
   1  -1  39   30.20    2.84
   1   1  39   31.22    2.46
   1  -1  40   23.19    2.21
   1   1  40   24.16    2.13
   1   1  40   20.52    2.26
   1  -1  40   22.20    2.42
   1   1  40   21.37    2.12
   1   1  41    9.35    1.35
   1  -1  41   11.99    1.56
   1   1  41   10.45    1.44
   1   1  41   11.30    1.74
   1  -1  41   10.31    1.64
   1  -1  42    1.50    0.55
   1  -1  42    1.10    0.70
   1   1  42    1.59    0.61
   1   1  42    1.51    0.53
   1   1  42    1.24    0.68
   1   1  43    3.28    0.94
   1   1  43    1.56    0.52
   1   1  43    1.35    0.41
   1  -1  43    1.42    0.60
   1  -1  43    1.16    0.59
   1   1  44    2.29    0.63
   1  -1  44    2.79    0.75
   1  -1  44    1.17    0.55
   1   1  44    2.16    0.74
   1   1  44    1.96    0.59
   1   1  45   38.65    2.45
   1   1  45   36.61    2.82
   1   1  45   32.77    2.34
   1  -1  45   35.76    2.84
   1  -1  45   38.97    2.57
   1   1  46   56.16    3.42
   1  -1  46   56.61    3.44
   1   1  46   50.84    2.82
   1  -1  46   55.74    2.98
   1   1  46   54.94    2.85
   1  -1  47    4.20    0.79
   1  -1  47    5.15    1.08
   1   1  47    4.20    0.77
   1   1  47    5.22    1.07
   1  -1  48    0.96    0.63
   1   1  48    1.48    0.69
   1  -1  48    1.68    0.52
   1   1  48    1.63    0.51
   1  -1  49   38.90    2.19
   1   1  49   34.77    2.50
   1  -1  49   37.91    2.55
   1   1  49   36.25    2.01
   1  -1  50  246.99    6.11
   1   1  50  240.23    4.72
   1  -1  50  240.74    5.16
   1   1  50  244.57    6.13
   1   1  51    3.92    0.80
   1  -1  51    3.74    0.77
   1  -1  51    5.00    0.73
   1   1  52    0.72    0.36
   1  -1  52    0.49    0.34
   1  -1  52    0.98    0.30
   1   1  53   12.16    1.14
   1  -1  53   11.23    0.82
   1  -1  53   11.87    1.14
   1  -1  54   30.36    1.59
   1   1  54   29.09    1.61
  -1   3  54    3.41    0.56
  -1  -3  53   50.96    1.86
  -1   3  53   54.98    2.36
  -1  -3  53   55.95    2.28
  -1   3  52    0.78    0.21
  -1  -3  52    0.83    0.32
  -1   3  52    1.20    0.41
  -1  -3  52    1.31    0.46
  -1   3  51    4.23    0.64
  -1   3  51    3.83    0.73
  -1  -3  51    3.40    0.70
  -1  -3  51    2.82    0.56
  -1   3  50   21.95    1.56
  -1  -3  50   23.06    1.89
  -1   3  50   25.11    1.99
  -1   3  50   22.73    1.62
  -1  -3  50   22.93    1.66
  -1   3  49   73.54    3.08
  -1   3  49   77.65    3.59
  -1  -3  49   73.74    3.11
  -1  -3  49   72.03    3.48
  -1   3  49   69.82    3.11
  -1   3  48    6.74    1.16
  -1  -3  48    6.72    1.16
  -1   3  48    5.65    0.91
  -1  -3  48    6.67    1.00
  -1   3  48    7.07    1.12
  -1  -3  47    3.59    0.77
  -1  -3  47    4.43    1.06
  -1   3  47    3.26    0.79
  -1   3  47    4.42    0.88
  -1   3  47    4.45    0.98
  -1  -3  46   28.17    2.23
  -1   3  46   27.68    2.41
  -1  -3  46   27.97    2.45
  -1   3  46   28.09    2.23
  -1   3  46   24.16    2.22
  -1  -3  45   49.46    2.99
  -1   3  45   51.39    3.36
   1  -3 -45   62.52    3.08
  -1   3  45   49.84    3.02
  -1  -3  45   51.60    3.44
  -1   3  45   53.68    3.52
  -1   3  44   38.16    3.00
  -1  -3  44   43.65    2.91
  -1   3  44   44.03    3.17
  -1   3  44   41.62    2.86
  -1  -3  44   44.01    3.25
   1  -3 -44   46.41    2.75
  -1   3  43   20.76    2.26
  -1   3  43   23.37    2.40
  -1   3  43   24.56    2.28
  -1  -3  43   25.48    2.35
  -1  -3  43   22.24    2.38
   1  -3 -43   23.81    2.02
  -1   3  42   93.00    4.92
   1  -3 -42  110.38    4.44
  -1   3  42  101.03    4.65
  -1  -3  42  107.05    4.75
  -1   3  42  105.44    5.10
  -1  -3  42  103.51    5.18
  -1   3  41   23.81    2.47
   1  -3 -41   21.75    2.01
  -1   3  41   17.42    2.26
  -1  -3  41   22.37    2.50
  -1   3  41   22.31    2.26
  -1  -3  41   23.96    2.29
  -1  -3  40    4.50    1.16
  -1   3  40    4.53    1.21
  -1   3  40    3.85    1.01
   1  -3 -40    5.16    0.97
  -1  -3  40    4.08    1.04
  -1   3  40    3.36    1.02
   1  -3 -39   63.24    3.46
  -1  -3  39   52.24    3.45
  -1  -3  39   55.55    3.92
  -1   3  39   55.97    3.75
  -1   3  39   54.91    3.98
  -1   3  39   52.56    3.48
  -1  -3  38   99.09    4.70
  -1   3  38   98.75    4.97
  -1   3  38   97.37    4.71
   1  -3 -38  115.94    4.68
  -1   3  38  101.40    5.37
  -1  -3  38  101.65    5.24
  -1   3  37    5.45    1.21
   1  -3 -37    4.49    1.78
  -1  -3  37    6.73    1.30
  -1   3  37    8.10    2.71
  -1  -3  37    6.57    1.41
   1  -3 -37    5.30    1.95
  -1   3  37    7.19    1.37
   1   3 -37    4.46    1.71
  -1  -3  37    7.09    2.73
  -1  -3  37    5.81    2.65
   1  -3 -37    6.76    1.20
  -1   3  37    6.41    1.34
   1  -3 -36    1.70    1.04
  -1   3  36    2.92    0.91
   1   3 -36    2.95    1.54
   1  -3 -36    3.41    0.87
  -1  -3  36    1.97    1.94
  -1   3  36    2.05    0.71
  -1   3  36    2.06    1.68
  -1  -3  36    4.43    2.22
  -1  -3  36    2.57    0.86
   1  -3 -36    3.45    1.55
  -1   3  36    2.81    0.92
  -1  -3  36    2.85    0.86
  -1  -3  35   12.56    1.92
  -1   3  35   13.82    2.01
  -1  -3  35   11.90    3.77
   1   3 -35   12.61    3.03
  -1   3  35   12.30    1.66
   1  -3 -35   14.15    3.08
  -1  -3  35   10.82    1.53
   1  -3 -35   16.24    1.74
  -1   3  35   13.31    1.82
  -1   3  35   13.56    3.68
  -1  -3  35   13.40    3.82
   1  -3 -35   14.76    3.09
   1   3 -35   14.51    2.58
   1  -3 -34    2.19    1.35
  -1   3  34    0.01    0.72
  -1   3  34    1.78    0.89
  -1  -3  34    0.97    0.60
  -1  -3  34    1.96    0.73
   1   3 -34    0.23    0.41
   1   3 -34    2.09    1.27
   1  -3 -34    1.40    0.47
  -1  -3  34    0.62    1.18
   1  -3 -34    2.39    1.39
  -1  -3  34    0.33    0.92
  -1   3  34    1.87    0.83
  -1   3  34    1.64    0.66
   1  -3 -33  297.81    7.26
  -1   3  33  375.91   18.47
  -1  -3  33  363.97   20.06
  -1   3  33  292.58    8.97
  -1  -3  33  301.36    8.79
  -1   3  33  291.93    8.32
  -1   3  33  295.20    8.05
  -1  -3  33  296.69    8.05
   1  -3 -33  282.93   13.51
  -1   3  33  293.08    7.22
   1  -3 -33  257.00   12.30
   1   3 -33  260.27   10.60
  -1  -3  33  332.20   17.42
   1   3 -33  280.93   13.35
   1  -3 -32   28.06    4.22
  -1   3  32   30.66    2.87
  -1  -3  32   29.43    2.54
   1  -3 -32   27.87    4.01
  -1   3  32   32.67    2.66
  -1   3  32   30.53    2.65
   1  -3 -32   32.25    2.37
  -1  -3  32   37.01    5.67
   1   3 -32   32.17    4.53
   1   3 -32   26.66    3.32
  -1  -3  32   30.20    2.80
  -1  -3  32   42.33    6.82
   1   3 -31  123.80    7.05
  -1  -3  31  136.28   11.87
   1   3 -31  134.22    8.95
   1  -3 -31  128.90    8.84
   1  -3 -31  121.97    8.27
  -1  -3  31  113.54    9.99
   1  -3 -30   95.79    7.42
  -1  -3  30   72.71    7.84
   1   3 -30   96.86    7.51
   1   3 -30   88.26    5.79
   1  -3 -30   83.87    6.86
  -1  -3  30   86.77    9.37
   1   3 -29  712.55   19.86
  -1  -3  29  683.41   23.60
   1   3 -29  655.46   15.50
   1  -3 -29  688.23   19.62
  -1  -3  29  782.66   27.48
   1  -3 -29  644.67   18.41
  -1  -3  29  764.25   19.53
   1  -3 -28    0.24    0.69
   1  -3 -28    1.63    1.00
   1   3 -28    1.26    1.17
  -1  -3  28   -0.17    0.43
   1   3 -28    1.06    0.63
  -1  -3  28    1.25    1.51
  -1  -3  28    1.50    0.92
   1  -3 -27   13.37    2.61
   1   3 -27   12.63    2.13
   1  -3 -27   14.38    2.72
  -1  -3  27   23.64    4.29
  -1  -3  27   28.67    3.76
  -1   3  27   25.36    3.54
  -1  -3  27   28.06    5.08
   1   3 -27   13.03    2.58
  -1   3  26   46.28    4.58
   1   3 -26   40.87    4.43
   1   3 -26   41.39    3.67
   1  -3 -26   32.56    4.01
  -1  -3  26   43.31    5.63
   1  -3 -26   38.84    4.38
  -1  -3  26   48.60    4.75
  -1  -3  26   48.89    6.42
  -1  -3  25    4.28    1.99
  -1  -3  25    3.14    1.51
   1   3 -25    2.90    1.01
  -1  -3  25    3.48    1.30
  -1   3  25    3.14    1.27
   1   3 -25    2.31    1.08
   1  -3 -25    1.73    0.89
   1  -3 -25    1.71    1.13
   1   3 -24    0.65    0.35
   1  -3 -24    2.35    1.12
   1  -3 -24    1.72    0.98
  -1  -3  24    4.25    2.04
  -1  -3  24    2.94    1.60
  -1  -3  24    3.17    1.22
   1   3 -24    0.72    0.62
  -1  -3  23  801.40   18.34
   1  -3 -23  765.53   18.29
   1   3 -23  797.45   18.32
  -1  -3  23  685.76   20.96
   1   3 -23  781.63   14.98
   1  -3 -23  757.34   18.30
  -1   3  23  734.37   14.95
  -1  -3  23  815.87   24.55
   1  -3 -22  613.24   16.21
   1   3 -22  638.39   16.15
  -1  -3  22  648.25   16.25
   1  -3 -22  613.95   16.20
  -1  -3  22  676.13   21.76
  -1  -3  22  580.15   18.84
   1   3 -22  652.83   13.39
  -1   3  22  600.24   13.48
   1  -3 -21  643.93   16.03
   1   3 -21  687.28   16.22
  -1  -3  21  711.39   16.69
   1  -3 -21  664.81   16.77
  -1   3  21  644.78   13.84
  -1  -3  21  729.00   21.99
   1   3 -21  688.15   13.43
  -1  -3  21  630.57   19.06
  -1  -3  20   38.88    4.70
  -1  -3  20   42.06    4.00
   1   3 -20   41.74    3.98
   1  -3 -20   41.22    4.10
  -1   3  20   40.91    3.49
  -1  -3  20   46.49    5.42
   1  -3 -20   39.95    3.98
   1   3 -20   42.26    3.27
  -1  -3  19  199.93   10.27
  -1   3  19  210.58    7.76
   1   3 -19  270.84    8.00
   1  -3 -19  272.75    8.63
  -1  -3  19  244.30   11.81
   1  -3 -19  271.08   10.06
   1   3 -19  283.02   10.00
  -1  -3  19  223.32    9.02
   1  -3 -19  288.07   10.76
   1  -3 -18  531.92   14.41
   1   3 -18  540.15   13.48
   1   3 -18  535.90   10.99
  -1  -3  18  494.41   15.71
   1  -3 -18  520.67   11.79
  -1  -3  18  537.69   13.74
  -1  -3  18  543.77   16.97
   1  -3 -18  499.92   13.35
  -1   3  18  492.53   11.70
   1  -3 -17  129.35    6.63
   1   3 -17  134.01    6.57
  -1  -3  17  165.73    9.16
   1   3 -17  136.18    5.37
  -1   3  17  152.59    6.42
   1  -3 -17  145.66    7.52
  -1  -3  17  147.99    8.39
   1  -3 -17  132.40    5.94
  -1   3  17  149.03    3.58
  -1  -3  17  159.23    7.36
  -1   3  16    4.84    0.64
   1  -3 -16    5.89    1.31
   1   3 -16    3.74    1.16
   1  -3 -16    5.39    1.44
   1  -3 -16    5.18    1.44
  -1  -3  16    5.95    1.70
   1   3 -16    4.23    0.94
  -1  -3  16    6.85    1.78
  -1  -3  16    5.50    1.41
  -1   3  16    4.57    1.13
  -1  -3  15  571.39   13.33
   1  -3 -15  576.41   13.90
   1  -3 -15  515.38   11.37
   1  -3 -15  497.92   12.37
  -1   3  15  564.84   11.79
  -1   3  15  527.08    6.14
  -1  -3  15  600.54   15.82
   1   3 -15  547.49   10.07
  -1  -3  15  598.27   12.23
  -1  -3  15  564.08   15.41
   1   3 -15  533.12   12.33
   1  -3 -14   93.81    5.27
   1  -3 -14  102.84    5.07
   1  -3 -14  113.62    6.10
   1   3 -14  107.34    4.34
  -1  -3  14  145.83    6.59
  -1  -3  14  165.88    6.20
   1   3 -14   95.98    5.11
  -1  -3  14  158.70    7.67
  -1   3  14  137.97    2.97
  -1  -3  14  151.29    7.75
  -1   3  14  145.09    5.83
  -1  -3  13 1243.84   20.45
  -1  -3  13 1150.45   15.57
  -1  -3  13 1104.03   17.65
   1  -3 -13 1262.59   18.57
  -1  -3  13 1113.95   20.31
   1  -3 -13 1302.19   17.61
   1   3 -13 1286.99   18.02
   1  -3 -13 1310.99   19.81
   1   3 -13 1261.40   14.24
  -1   3  13 1132.55   15.90
  -1   3  12  650.46   11.70
   1   3 -12  696.63   12.72
   1  -3 -12  670.75   13.12
   1  -3 -12  708.68   12.70
  -1  -3  12  672.41   11.43
   1   3 -12  682.93   10.04
  -1  -3  12  725.37   14.91
   1  -3 -12  718.08   14.47
  -1  -3  12  664.17   13.27
  -1  -3  12  634.68   14.85
   1  -3 -11  249.45    7.67
  -1  -3  11  234.76    6.37
   1   3 -11  244.21    5.74
  -1  -3  11  226.15    8.46
  -1   3  11  232.16    6.85
  -1  -3  11  225.87    7.49
   1   3 -11  255.55    7.34
   1  -3 -11  252.37    8.28
   1  -3 -11  260.01    7.56
  -1  -3  11  251.74    8.28
  -1   3  10    3.29    0.39
   1   3 -10    9.34    1.08
  -1  -3  10    6.59    1.29
   1   3 -10   11.49    1.52
   1  -3 -10   10.02    1.52
   1  -3 -10   11.05    1.58
  -1   3  10    4.82    0.97
  -1  -3  10    5.18    0.92
  -1  -3  10    4.94    1.11
   1   3  -9  115.14    4.46
  -1   3   9   93.45    4.16
   1  -3  -9  110.02    4.68
  -1  -3   9  103.54    4.78
   1  -3  -9  108.92    4.61
  -1  -3   9   87.08    4.40
   1   3  -9  107.32    3.36
  -1  -3   9   90.25    3.59
  -1  -3   8  647.41    9.17
  -1  -3   8  680.00   11.65
   1  -3  -8  518.78    9.44
  -1  -3   8  611.73   11.23
  -1   3   8  627.72   10.49
   1   3  -8  552.23    9.23
  -1   3   8  510.44    9.10
   1   3  -8  547.63    7.05
   1  -3  -7   59.11    3.02
  -1  -3   7   31.15    2.39
  -1   3   7   68.51    3.16
  -1   3   7   27.83    2.19
   1   3  -7   60.02    2.84
  -1  -3   7   26.66    2.26
   1   3  -7   54.42    2.03
   1   3  -6    7.46    0.94
   1  -3  -6    5.40    1.04
  -1   3   6    6.31    1.05
  -1  -3   6    5.50    1.03
   1  -3  -6    7.01    0.98
  -1  -3   6    4.17    0.98
  -1   3   6    7.98    1.02
  -1  -3   6    4.53    0.76
  -1  -3   6    4.21    0.82
   1   3  -6    3.62    0.33
  -1  -3   5  826.63    9.22
   1  -3  -5  799.30   11.57
  -1  -3   5  835.78   11.83
  -1   3   5  839.61    9.32
  -1  -3   5  817.65   10.81
  -1   3   5  816.12   11.28
   1   3  -5  854.96    8.98
   1  -3  -5  832.05    9.63
  -1  -3   4 1118.02   10.40
  -1  -3   4 1192.76   13.06
  -1   3   4 1074.62   12.69
   1  -3  -4 1273.00   10.86
   1   3  -4 1266.29    9.87
  -1   3   4 1288.64   10.64
   1   3  -4 1262.57   15.39
  -1  -3   4 1122.35   12.29
   1  -3  -4 1215.57   13.75
  -1  -3   3   15.73    1.47
  -1  -3   3   17.48    1.29
  -1  -3   3   12.77    1.30
   1   3  -3    9.73    1.33
   1  -3  -3   14.08    1.00
   1   3  -3   11.24    0.84
  -1   3   3   10.10    0.92
   1  -3  -3   10.35    0.90
   1  -3  -3    9.92    1.22
   1  -3  -2  576.01    8.76
   1  -3  -2  528.94    6.42
   1  -3  -2  608.58    6.12
  -1  -3   2  524.95    7.55
   1   3  -2  624.02   10.10
  -1   3   2  622.15    6.81
  -1  -3   2  521.49    8.04
  -1  -3   2  487.47    6.70
   1   3  -2  612.62    5.48
  -1  -3   2  609.12    7.28
  -1  -3   1  121.91    2.50
   1   3  -1  126.64    2.28
  -1   3   1  140.78    3.28
   1  -3  -1   95.39    3.38
   1  -3  -1  126.69    2.58
  -1  -3   1  110.81    3.74
  -1  -3   1  163.52    4.08
   1  -3  -1  114.54    3.74
  -1  -3   1  110.89    3.23
   1  -3  -1  115.73    3.18
   1   3  -1  132.92    4.45
   1  -3  -1  120.40    3.91
  -1   3   0   22.55    1.40
   1  -3   0   14.30    1.19
   1  -3   0   12.39    1.16
   1  -3   0   15.45    1.38
  -1  -3   0   21.60    1.59
   1  -3   0   15.99    1.51
   1   3   0   20.61    1.78
  -1  -3   0   15.02    1.11
  -1  -3   0   19.93    1.12
  -1   3  -1    5.21    0.75
  -1  -3  -1    4.43    0.60
   1  -3   1    4.06    0.74
  -1  -3  -1    5.39    0.89
   1  -3   1    4.34    0.70
   1  -3   1    4.31    0.76
  -1  -3  -1    4.90    0.62
  -1  -3  -2  700.84   10.12
  -1  -3  -2  680.07    7.91
  -1  -3  -2  699.10    6.78
   1   3   2  695.07   10.09
   1  -3   2  674.68    9.42
   1  -3   3  131.84    4.35
  -1  -3  -3  119.16    3.63
   1  -3   3  115.43    3.19
   1  -3   3  123.38    4.19
   1   3   3  115.70    4.21
  -1  -3  -3  125.12    4.50
  -1  -3  -4 1273.47   14.76
   1  -3   4 1142.09   13.38
   1   3   4 1281.15   14.31
   1   3   5 1692.37   16.95
   1  -3   5 1624.47   11.27
   1   3   6  210.56    6.14
  -1  -3  -6  218.10    6.05
   1   3   7  174.35    5.82
  -1  -3  -7  167.93    5.59
   1   3   8   38.66    2.87
  -1  -3  -8   39.60    2.86
  -1  -3  -9  100.65    4.82
   1  -3   9  126.91    2.93
   1  -3   9  133.18    5.51
  -1   3  -9   89.87    3.03
  -1  -3  -9  105.80    4.91
   1   3   9   90.87    4.58
   1   3  10  525.98    8.59
  -1  -3 -10  498.76   10.75
   1  -3  10  552.17   11.84
   1   3  10  502.60   11.14
  -1  -3 -10  558.10   11.64
   1  -3  10  545.49   11.63
  -1   3 -10  502.89    7.15
   1  -3  10  501.97    5.87
   1  -3  10  560.93   10.15
  -1  -3 -11    7.74    1.60
  -1   3 -11    3.84    0.68
   1  -3  11    4.92    1.43
   1  -3  11    3.16    0.49
   1   3  11    4.64    0.86
   1  -3  11    4.38    1.27
   1  -3  11    3.17    0.91
   1  -3  11    6.36    1.48
   1   3  11    3.75    1.08
  -1  -3 -11    5.27    1.45
  -1   3 -12 1461.65   12.39
  -1  -3 -12 1515.02   20.61
  -1  -3 -12 1473.03   19.01
   1   3  12 1520.73   21.00
   1   3  12 1297.92   14.03
   1  -3  12 1287.06   19.53
   1  -3  12 1383.94   21.47
   1  -3  12 1332.31   19.31
   1  -3  12 1343.61   17.04
  -1   3 -12 1422.77   15.55
  -1  -3 -13  188.36    6.95
  -1  -3 -13  202.59    7.81
   1  -3  13  150.29    6.69
   1  -3  13  144.25    6.87
   1  -3  13  164.43    7.90
   1  -3  13  153.04    6.05
   1   3  13  143.73    4.78
  -1  -3 -13  203.65    7.14
  -1   3 -13  185.49    5.83
  -1   3 -13  190.30    4.55
   1   3  13  211.90    8.22
   1  -3  14  431.47   13.23
  -1   3 -14  406.70    8.92
  -1  -3 -14  385.61   10.29
   1  -3  14  453.59   10.75
  -1  -3 -14  419.71   10.33
  -1   3 -14  417.26    6.83
   1   3  14  420.06    8.33
  -1  -3 -14  416.06   11.17
   1  -3  14  392.33    5.63
   1  -3  14  420.87   12.19
   1  -3  14  448.05   11.77
  -1   3 -15   29.32    2.93
  -1  -3 -15   29.05    3.10
  -1  -3 -15   28.62    2.76
  -1  -3 -15   26.65    2.84
   1  -3  15   46.39    4.62
   1  -3  15   47.56    3.72
   1  -3  15   45.16    4.20
   1   3  15   42.99    2.73
  -1   3 -15   27.22    2.50
  -1   3 -15   29.10    1.85
   1  -3  15   41.55    1.86
   1  -3  15   47.24    3.97
   1  -3  16  454.63   14.93
  -1  -3 -16  374.22   11.06
   1   3  16  430.22    8.84
   1   3  16  464.99    8.82
  -1   3 -16  391.18    6.90
  -1   3 -16  364.35   10.62
  -1   3 -16  376.21    9.34
   1  -3  16  391.10    5.78
   1  -3  16  472.73   11.94
   1  -3  16  471.66   12.51
   1  -3  16  438.07   13.32
  -1  -3 -16  374.90   10.03
  -1  -3 -16  356.77   10.53
  -1   3 -17  229.56    7.55
   1   3  17  192.43    5.81
   1   3  17  164.87    5.80
  -1  -3 -17  240.27    8.95
  -1  -3 -17  241.16    8.14
   1  -3  17  197.70   10.23
   1  -3  17  153.85    3.67
   1  -3  17  180.78    8.91
   1  -3  17  199.09    8.37
   1   3  17  182.99    5.96
  -1  -3 -17  231.98    8.72
  -1   3 -17  235.90    5.53
  -1   3 -17  239.67    8.87
   1  -3  18  579.55   18.29
   1   3  18  550.11   10.57
   1  -3  18  566.78   16.17
   1   3  18  604.67   10.55
  -1   3 -18  627.40   14.76
  -1  -3 -18  598.69   14.48
  -1  -3 -18  619.57   13.15
  -1  -3 -18  617.99   14.63
  -1   3 -18  603.53   12.52
   1  -3  18  605.44   14.76
  -1   3 -18  630.58    9.25
  -1  -3 -19  395.23   11.87
   1   3  19  287.06    8.15
   1  -3  19  346.28   11.42
   1   3  19  356.23    8.21
  -1   3 -19  379.10   10.27
  -1  -3 -19  393.61   10.64
  -1   3 -19  404.82    7.51
  -1  -3 -19  385.26   11.81
   1  -3  19  326.53   12.65
   1   3  19  322.06    8.16
  -1   3 -19  411.52   12.18
   1  -3  19  349.18   14.82
  -1   3 -20    8.25    1.08
   1  -3  20   12.65    2.24
  -1   3 -20    7.03    1.50
  -1   3 -20    6.78    1.73
  -1  -3 -20    7.26    1.72
  -1  -3 -20    7.83    1.56
   1   3  20   10.84    1.47
   1  -3  20   12.42    3.19
   1  -3  20   11.92    2.59
  -1  -3 -20    8.42    1.85
   1   3  20    8.71    1.52
   1   3  20   11.18    1.55
  -1   3 -21   73.57    5.48
  -1  -3 -21   68.92    4.57
   1  -3  21   79.88    5.68
   1  -3  21   70.63    6.21
  -1  -3 -21   68.43    5.07
  -1  -3 -21   71.74    5.34
   1  -3  21   80.98    7.56
   1   3  21   82.03    4.10
   1   3  21   63.92    4.11
  -1   3 -21   71.83    4.69
  -1  -3 -22  320.11    9.97
  -1  -3 -22  322.91   11.59
  -1   3 -22  327.17   10.13
   1  -3  22  323.68   11.58
   1  -3  22  317.57   15.59
  -1  -3 -22  324.17   11.30
  -1   3 -22  354.22   12.11
   1   3  22  346.01    8.51
   1  -3  22  308.00   13.34
  -1  -3 -23  438.51   13.68
   1  -3  23  394.08   15.50
   1  -3  23  439.34   18.70
   1  -3  23  442.44   13.74
  -1   3 -23  467.30   14.25
  -1   3 -23  439.53   12.01
  -1  -3 -23  435.44   11.73
  -1  -3 -23  443.99   13.37
   1  -3  24   11.85    3.25
  -1   3 -24   19.92    2.61
   1  -3  24   13.75    2.62
  -1  -3 -24   20.49    2.92
  -1  -3 -24   20.38    3.03
  -1   3 -24   21.28    3.15
  -1  -3 -24   21.18    2.65
   1  -3  24   11.84    2.79
  -1   3 -25  154.23    8.49
  -1  -3 -25  145.83    8.03
   1  -3  25  135.05    9.61
  -1   3 -25  142.89    7.08
   1  -3  25  152.28    8.35
  -1  -3 -25  150.09    8.31
   1  -3  25  147.02   11.38
  -1  -3 -25  139.24    6.83
   1  -3  26   35.33    4.93
   1  -3  26   35.90    5.70
   1  -3  26   37.62    4.21
  -1  -3 -26   25.55    2.99
  -1  -3 -26   26.73    3.57
  -1   3 -26   29.00    3.27
  -1   3 -26   27.46    3.63
  -1  -3 -26   27.80    3.52
  -1   3 -27   32.41    4.06
   1  -3  27   49.93    6.03
  -1  -3 -27   24.59    2.96
  -1  -3 -27   28.08    3.65
   1  -3  27   50.54    7.02
  -1   3 -27   30.96    3.44
   1  -3  27   56.79    5.25
  -1  -3 -27   28.66    3.79
  -1  -3 -28    0.36    0.61
  -1   3 -28    0.72    0.69
   1  -3  28    0.45    0.63
  -1  -3 -28    1.54    1.03
  -1  -3 -28   -0.20    0.34
   1  -3  28    0.81    1.02
  -1   3 -28    1.33    1.17
  -1   3 -29  865.17   18.78
  -1  -3 -29  812.57   17.29
   1  -3  29  930.44   21.77
  -1  -3 -29  844.38   20.34
  -1   3 -29  942.36   22.83
   1  -3  29  844.56   25.93
   1  -3  29  938.11   31.29
  -1  -3 -29  895.32   21.88
   1  -3  30  429.16   15.02
  -1   3 -30  423.08   15.54
  -1  -3 -30  355.21   11.52
  -1  -3 -30  369.70   13.84
   1  -3  30  432.00   21.69
  -1  -3 -30  390.13   14.68
  -1   3 -30  382.55   12.70
   1  -3  30  368.06   17.33
   1  -3  31  306.84   18.66
  -1   3 -31  289.81   11.25
   1  -3  31  288.37    6.84
   1  -3  31  267.42   15.07
  -1  -3 -31  275.92   12.21
  -1  -3 -31  299.55   13.10
  -1   3 -31  316.69   13.84
   1  -3  31  293.25   12.65
   1   3  31  298.55    7.68
   1  -3  31  280.06    7.34
  -1   3 -32   52.43    4.83
  -1   3 -32   53.18    5.77
  -1  -3 -32   56.71    3.11
   1   3  32   55.10    3.37
   1  -3  32   69.96    9.08
   1   3  32   73.92    8.46
  -1  -3 -32   46.75    5.13
  -1  -3 -32   52.67    5.68
   1   3  32   51.72    3.61
   1  -3  32   56.57    3.61
   1  -3  32   63.53    7.54
   1   3  32   58.34    3.41
   1  -3  32   57.80    3.44
   1  -3  32   54.74    3.05
   1  -3  32   62.60    5.88
   1   3  33  216.51    6.61
   1   3  33  202.21    7.24
   1  -3  33  222.16    6.83
   1   3  33  221.46    6.90
   1  -3  33  211.33    6.04
   1  -3  33  240.42   16.97
  -1  -3 -33  188.18   10.45
  -1  -3 -33  221.20    6.18
   1   3  33  266.13   16.15
   1  -3  33  229.34   14.32
  -1   3 -33  218.08   11.79
  -1   3 -33  195.30    9.48
   1  -3  33  211.07    7.15
   1   3  33  233.69    6.05
  -1  -3 -33  202.09   11.07
  -1  -3 -34    1.92    0.74
   1  -3  34    6.09    2.57
   1  -3  34    4.31    2.41
  -1   3 -34    3.17    1.25
   1   3  34    3.74    0.85
   1   3  34    4.23    2.30
   1  -3  34    4.47    1.16
   1   3  34    5.04    1.24
   1  -3  34    4.98    1.06
   1   3  34    5.08    1.20
  -1  -3 -34    5.11    0.98
  -1  -3 -34    4.79    1.72
  -1   3 -34    5.46    1.98
   1   3  34    4.99    1.18
   1  -3  34    4.65    1.06
  -1  -3 -35    4.39    1.64
  -1  -3 -35    2.52    1.41
   1   3  35    3.28    1.03
   1   3  35    2.48    0.70
   1  -3  35    1.52    0.82
   1  -3  35    1.91    0.65
   1   3  35    1.93    0.89
  -1  -3 -35    4.14    0.81
  -1   3 -35    4.45    1.67
   1  -3  35    2.57    0.78
  -1   3 -35    4.07    1.36
   1  -3  35    2.79    0.95
   1   3  35    2.32    2.01
   1   3  35    1.72    0.67
   1   3  36   11.79    3.66
   1   3  36   19.56    2.16
  -1  -3 -36   21.34    3.69
  -1  -3 -36   18.87    3.49
  -1  -3 -36   31.67    2.41
  -1   3 -36   22.54    3.36
  -1   3 -36   25.88    4.22
   1  -3  36   16.28    1.89
   1  -3  36   14.33    4.47
   1  -3  36   19.57    2.26
   1   3  36   17.83    1.99
   1   3  36   23.23    2.49
   1   3  36   18.96    1.78
   1  -3  37    2.08    2.28
  -1   3 -37    1.82    0.93
  -1  -3 -37    0.08    0.39
   1  -3  37    0.59    0.56
  -1  -3 -37    0.86    0.46
  -1  -3 -37    0.68    0.84
   1   3  37    0.38    0.67
   1   3  37    0.33    0.45
   1  -3  37    0.52    0.60
   1   3  37    0.28    0.34
  -1   3 -37    0.87    0.91
   1   3  37   -0.03    0.48
   1   3  37    1.05    1.63
   1   3  38  271.75    7.63
   1   3  38  256.48    8.31
   1  -3  38  277.87    7.77
   1   3  38  275.94    8.04
   1  -3  38  272.27    8.32
   1   3  38  306.07    7.17
  -1  -3 -38  311.26    7.56
   1   3  39  118.12    4.43
  -1  -3 -39  123.48    4.79
   1  -3  39  108.06    5.28
   1   3  39  110.76    5.14
   1  -3  39  107.25    4.84
   1   3  39  101.32    4.67
   1   3  39  102.76    5.25
   1  -3  40   20.51    2.31
   1   3  40   25.16    2.06
   1  -3  40   23.09    2.23
   1   3  40   18.15    2.20
  -1  -3 -40   20.04    1.94
   1   3  40   19.44    2.21
   1   3  40   21.13    2.13
   1   3  41    3.57    1.05
   1  -3  41    5.37    1.23
   1   3  41    8.59    1.23
   1   3  41    5.68    1.25
   1  -3  41    8.16    1.33
  -1  -3 -41    4.04    0.91
   1   3  41    6.25    1.24
   1   3  42   11.82    1.71
   1  -3  42   13.54    1.67
   1   3  42   12.35    1.59
  -1  -3 -42   14.06    1.61
   1   3  42   12.77    1.76
   1  -3  42   13.42    1.84
   1   3  42   14.99    1.55
   1  -3  43   26.39    2.35
   1   3  43   22.35    2.30
   1  -3  43   22.12    2.34
  -1  -3 -43   22.95    1.96
   1   3  43   20.10    2.21
   1   3  43   21.55    2.11
   1   3  44    0.66    0.51
   1   3  44    0.67    0.31
  -1  -3 -44    0.82    0.48
   1   3  44    0.94    0.46
   1  -3  44    1.41    0.63
   1  -3  44   -0.06    0.43
   1  -3  45  140.64    5.49
   1  -3  45  143.69    5.09
   1   3  45  132.70    5.14
   1   3  45  141.26    4.96
   1   3  45  147.52    5.60
   1  -3  46    7.35    1.09
   1  -3  46    6.26    1.12
   1   3  46    6.34    1.03
   1   3  46    7.38    1.16
   1   3  46    6.58    1.22
   1   3  47   23.04    1.86
   1  -3  47   25.90    2.23
   1  -3  47   22.50    1.91
   1   3  47   24.83    2.17
   1  -3  48   35.27    2.25
   1  -3  48   34.00    2.44
   1   3  48   34.45    2.46
   1   3  48   32.17    2.10
   1   3  49  159.88    5.07
   1   3  49  153.22    4.27
   1  -3  49  153.14    4.91
   1  -3  49  160.75    4.55
   1   3  50   59.08    2.45
   1  -3  50   60.42    2.66
   1  -3  50   56.78    2.83
   1   3  50   58.54    2.94
   1   3  51    4.50    0.80
   1  -3  51    3.94    0.73
   1  -3  51    3.22    0.61
   1   3  51    4.81    0.63
   1  -3  52    0.94    0.38
   1   3  52    1.43    0.45
   1  -3  52    1.09    0.30
   1   3  53   36.36    1.89
   1  -3  53   38.27    1.60
   1  -3  53   36.81    1.79
   1   3  54    2.16    0.47
  -1   5  53   21.57    1.28
  -1  -5  53   21.58    1.18
  -1   5  52    0.32    0.28
  -1   5  52    0.57    0.23
  -1  -5  52    0.95    0.33
  -1  -5  52    0.30    0.22
  -1  -5  51   18.04    1.35
  -1   5  51   19.24    1.48
  -1   5  51   17.30    1.31
  -1   5  51   15.58    1.17
  -1  -5  51   17.49    1.35
  -1   5  50    0.72    0.27
  -1   5  50    1.55    0.47
  -1  -5  50    1.47    0.45
  -1  -5  50    1.81    0.52
  -1   5  50    1.94    0.53
  -1   5  49   44.75    2.38
  -1  -5  49   43.29    2.51
  -1   5  49   46.07    2.63
  -1   5  49   42.97    2.41
  -1  -5  49   43.91    2.41
   1  -5 -48    3.30    0.67
  -1  -5  48    2.40    0.68
  -1   5  48    2.53    0.68
  -1   5  48    3.34    0.80
  -1   5  48    3.52    0.72
  -1  -5  48    3.52    0.73
  -1  -5  47    6.40    1.10
  -1   5  47    6.95    1.10
  -1   5  47    6.40    1.03
  -1  -5  47    5.07    0.89
   1  -5 -47    7.27    0.98
  -1   5  47    6.21    1.11
  -1   5  46    1.60    0.60
  -1  -5  46    2.29    0.80
  -1   5  46    1.85    0.56
  -1   5  46    1.68    0.65
  -1  -5  46    2.26    0.79
   1  -5 -46    0.87    0.34
  -1  -5  45   35.88    2.78
   1  -5 -45   40.21    2.50
  -1   5  45   35.23    2.68
  -1   5  45   35.46    2.76
  -1  -5  45   35.84    2.60
  -1   5  45   35.02    2.53
   1  -5 -44   57.00    3.10
  -1   5  44   55.29    3.27
  -1  -5  44   55.56    3.30
  -1   5  44   56.45    3.49
  -1   5  44   52.74    3.44
  -1  -5  44   53.02    3.51
   1  -5 -43  107.56    4.33
  -1   5  43   96.52    4.79
  -1  -5  43  103.57    4.97
  -1  -5  43  111.08    4.80
  -1   5  43  111.36    4.97
  -1   5  43  106.79    4.67
  -1  -5  42   11.38    1.77
  -1   5  42   13.29    1.84
  -1   5  42   11.95    1.64
  -1  -5  42   12.60    1.69
  -1   5  42   11.71    1.72
   1  -5 -42   11.05    1.42
  -1   5  41   82.97    4.64
  -1   5  41   83.39    3.58
   1  -5 -41   86.91    4.06
  -1   5  41   88.47    4.44
  -1  -5  41   87.78    4.78
  -1  -5  41   90.20    4.56
  -1   5  41   85.84    4.48
  -1   5  40   19.35    2.14
  -1   5  40   18.14    2.25
  -1   5  40   19.81    2.23
  -1  -5  40   19.85    2.36
  -1   5  40   18.99    1.75
  -1  -5  40   19.10    2.12
   1  -5 -40   20.70    1.99
  -1   5  39  203.94    6.86
  -1   5  39  187.62    5.62
   1  -5 -39  228.21    6.67
  -1   5  39  207.71    7.55
  -1  -5  39  208.51    7.06
  -1   5  39  215.46    7.21
  -1  -5  39  209.06    7.58
  -1   5  38   55.97    3.69
  -1   5  38   49.64    2.95
   1  -5 -38   59.39    3.41
  -1  -5  38   52.91    3.60
  -1   5  38   54.86    3.94
  -1  -5  38   55.19    3.93
  -1   5  38   52.80    3.53
  -1   5  37    0.62    0.67
  -1   5  37    0.61    0.57
  -1   5  37    0.81    0.46
   1  -5 -37    0.80    0.49
  -1  -5  37    0.12    0.52
  -1  -5  37    1.49    0.84
  -1   5  37    0.34    0.57
  -1  -5  36   21.13    2.28
   1  -5 -36   22.68    2.10
  -1  -5  36   21.77    5.03
  -1  -5  36   21.69    2.51
   1  -5 -36   14.56    3.22
   1  -5 -36   19.54    3.74
  -1   5  36   21.50    2.47
  -1  -5  36   27.53    5.68
  -1   5  36   19.55    2.19
  -1   5  36   21.51    2.24
   1   5 -36   18.20    3.61
  -1   5  36   20.17    1.91
  -1   5  35   82.81    4.45
   1  -5 -35   82.78    7.70
   1  -5 -35   96.94    4.33
  -1   5  35   89.70    5.04
  -1  -5  35   80.79    4.73
  -1  -5  35   79.80    9.42
   1   5 -35   91.27    8.03
  -1  -5  35   79.89    9.98
  -1  -5  35   76.54    4.29
  -1   5  35   82.12    4.35
   1  -5 -35   80.41    7.42
  -1   5  35   69.39    3.55
   1  -5 -34   18.31    3.53
   1   5 -34   17.88    3.49
  -1   5  34   24.07    2.15
  -1  -5  34   26.76    5.73
  -1  -5  34   22.64    2.35
  -1   5  34   21.19    2.22
  -1  -5  34   19.61    2.30
  -1  -5  34   25.13    5.39
  -1   5  34   19.57    2.19
   1  -5 -34   16.62    3.44
  -1   5  34   17.85    2.29
   1  -5 -34   19.13    1.94
  -1   5  33   85.85    4.41
  -1  -5  33  100.05   10.95
   1  -5 -33   91.50    4.12
   1  -5 -33   80.93    7.58
   1   5 -33   89.75    7.68
   1  -5 -33   82.16    7.37
  -1  -5  33   96.64   10.25
  -1  -5  33   88.42    4.64
  -1   5  33   82.36    3.87
  -1   5  33   88.56    4.95
  -1   5  33   86.36    4.47
  -1  -5  33   85.00    4.81
  -1   5  32   50.12    3.41
  -1   5  32   51.04    3.03
  -1  -5  32   53.85    3.62
  -1   5  32   53.80    3.46
  -1  -5  32   65.41    8.77
  -1  -5  32   48.42    3.65
   1   5 -32   47.91    5.56
  -1  -5  32   59.67    7.97
   1  -5 -32   49.29    3.01
  -1   5  32   50.79    3.69
   1  -5 -32   44.63    5.37
   1  -5 -32   46.87    5.65
  -1  -5  32   47.90    2.85
  -1   5  31   28.98    2.78
  -1  -5  31   27.20    5.34
  -1  -5  31   26.94    2.70
  -1  -5  31   25.98    2.52
   1   5 -31   26.30    4.06
  -1   5  31   25.16    2.34
   1  -5 -31   26.03    4.01
   1  -5 -31   25.35    4.17
  -1   5  31   24.75    2.09
  -1  -5  31   29.57    6.00
   1  -5 -31   28.94    2.30
  -1  -5  31   27.52    2.13
  -1   5  31   27.66    2.48
  -1   5  30    1.51    0.66
  -1  -5  30    0.96    1.00
  -1  -5  30   -0.17    1.00
   1  -5 -30    1.62    0.60
  -1  -5  30    0.95    1.14
  -1   5  30    1.29    0.65
   1   5 -30    0.84    0.68
   1  -5 -30    2.70    1.54
  -1  -5  30    0.95    0.69
  -1  -5  30    0.65    0.40
   1  -5 -30    1.57    1.07
   1   5 -29  457.96   16.22
  -1  -5  29  484.11   17.42
  -1  -5  29  460.85   21.17
  -1  -5  29  499.82   23.30
   1  -5 -29  432.28   15.98
   1  -5 -29  430.13   16.63
  -1  -5  28   96.98    9.59
   1  -5 -28   68.10    6.22
  -1  -5  28  101.36   10.22
   1   5 -28   73.79    6.34
   1   5 -28   73.17    4.98
   1  -5 -28   73.56    6.88
  -1  -5  28  103.08    8.01
  -1  -5  27   22.96    4.80
   1  -5 -27   12.74    2.88
   1   5 -27   13.37    2.05
   1  -5 -27   11.33    2.64
  -1  -5  27   20.82    3.54
  -1  -5  27   23.12    4.58
   1   5 -27   14.55    2.83
   1  -5 -26   21.64    3.68
  -1  -5  26   16.39    3.21
   1   5 -26   18.90    3.12
   1  -5 -26   20.39    3.32
  -1  -5  26   18.35    4.22
   1   5 -26   21.91    2.64
  -1  -5  26   16.22    3.85
  -1  -5  25  186.03   12.65
  -1  -5  25  201.10   10.77
   1  -5 -25  240.98   11.13
   1   5 -25  253.01   11.10
   1  -5 -25  244.67   11.98
   1   5 -25  242.26    8.56
  -1  -5  25  206.37   13.75
   1  -5 -24   76.78    6.13
  -1   5  24   86.83    5.57
   1   5 -24   84.32    6.25
  -1  -5  24   95.00    8.84
  -1  -5  24  102.54    7.65
   1   5 -24   88.82    5.07
  -1  -5  24  100.76    9.40
   1  -5 -24   81.97    7.02
   1  -5 -23  617.93   18.76
   1  -5 -23  608.12   16.98
   1   5 -23  665.18   17.21
  -1  -5  23  643.29   18.80
  -1  -5  23  575.24   21.28
  -1   5  23  560.58   14.23
   1   5 -23  642.76   13.36
  -1  -5  23  660.49   23.25
  -1   5  22   39.67    3.78
  -1  -5  22   49.02    6.21
  -1  -5  22   42.91    4.83
   1   5 -22   50.16    4.61
   1  -5 -22   43.39    4.49
   1  -5 -22   48.87    5.29
   1   5 -22   47.63    3.56
  -1  -5  22   42.63    5.71
   1  -5 -21  132.74    8.60
  -1   5  21  112.24    6.29
   1   5 -21  133.25    7.36
   1  -5 -21  125.88    7.48
  -1  -5  21  128.90    8.22
   1   5 -21  136.25    5.84
  -1  -5  21  127.26    9.59
  -1  -5  21  126.15    9.53
   1   5 -20    1.04    0.41
  -1  -5  20    2.24    0.84
  -1  -5  20    3.64    1.69
   1  -5 -20    1.62    1.22
  -1  -5  20    2.98    1.80
   1   5 -20    1.48    0.76
   1  -5 -20    1.00    0.83
  -1   5  20    2.17    1.05
  -1  -5  19 1069.41   22.86
   1   5 -19 1083.62   15.66
   1  -5 -19 1119.27   24.08
  -1  -5  19 1020.37   25.74
   1  -5 -19 1045.85   20.77
  -1  -5  19 1080.36   25.88
  -1  -5  19 1077.39   19.22
   1   5 -19 1100.12   20.15
  -1  -5  18   34.21    4.55
   1   5 -18   21.21    2.77
  -1  -5  18   31.62    3.21
  -1  -5  18   29.65    4.26
  -1  -5  18   35.32    4.12
   1   5 -18   24.76    2.33
   1  -5 -18   25.88    3.64
   1  -5 -18   21.13    2.96
  -1   5  18   31.84    3.15
  -1  -5  17  127.39    6.13
  -1  -5  17  130.53    8.31
   1  -5 -17  123.24    6.91
   1   5 -17  131.84    6.60
   1  -5 -17  133.23    8.01
  -1   5  17  115.66    6.00
  -1  -5  17  129.42    7.76
   1   5 -17  129.98    5.15
  -1  -5  17  122.16    8.36
  -1  -5  16   84.80    6.52
  -1   5  16   73.69    4.67
   1   5 -16   81.42    4.00
  -1  -5  16   80.95    6.06
   1  -5 -16   79.73    5.35
  -1  -5  16   77.58    4.70
   1  -5 -16   83.83    6.28
  -1  -5  16   79.41    6.64
   1   5 -16   83.84    5.13
  -1   5  15   31.42    3.04
  -1  -5  15   35.14    3.92
   1  -5 -15   14.06    2.64
   1   5 -15    8.81    1.71
  -1  -5  15   34.54    4.25
   1   5 -15   12.86    1.61
   1  -5 -15   10.44    2.00
  -1  -5  15   34.12    3.99
  -1  -5  15   35.27    3.04
   1   5 -14   44.02    2.74
  -1  -5  14   64.52    3.98
  -1  -5  14   61.53    5.06
   1  -5 -14   37.20    3.45
  -1  -5  14   65.40    5.61
   1  -5 -14   43.02    4.26
   1   5 -14   39.81    3.28
  -1  -5  14   64.90    5.25
  -1   5  14   57.96    4.01
  -1  -5  13  173.16    8.22
  -1  -5  13  160.95    8.52
   1  -5 -13  153.41    6.71
   1   5 -13  165.63    6.44
  -1  -5  13  161.76    8.03
  -1   5  13  152.21    6.44
   1  -5 -13  171.35    8.29
   1   5 -13  157.68    4.98
  -1  -5  13  160.53    5.96
   1  -5 -12  181.27    7.00
  -1  -5  12  223.60    8.96
   1   5 -12  192.44    6.58
  -1  -5  12  213.03    6.70
  -1   5  12  205.45    7.42
  -1   5  12  180.50    6.84
   1   5 -12  193.51    5.27
   1  -5 -12  196.09    8.66
  -1  -5  12  207.90    8.85
  -1  -5  12  218.27    9.49
  -1  -5  11  149.44    5.47
  -1  -5  11  150.07    7.63
   1   5 -11  118.17    2.47
   1  -5 -11  140.76    5.93
   1  -5 -11  148.98    7.32
  -1  -5  11  148.12    7.24
   1   5 -11  144.35    4.29
  -1   5  11  141.73    6.07
  -1   5  11  141.83    5.83
  -1  -5  11  154.03    7.16
   1   5 -11  147.01    5.47
  -1  -5  10   16.40    2.42
   1  -5 -10   12.99    2.18
  -1   5  10   17.44    2.14
   1   5 -10   13.42    1.28
  -1  -5  10   16.19    2.44
  -1   5  10   10.03    1.52
   1  -5 -10    9.64    1.52
  -1  -5  10   16.72    1.85
   1   5 -10   12.07    1.54
  -1  -5  10   17.17    2.36
  -1  -5   9  541.75    9.95
  -1   5   9  548.19   11.71
   1   5  -9  730.98   10.96
   1  -5  -9  695.56   14.94
  -1  -5   9  562.21   13.40
  -1  -5   9  581.84   12.92
  -1  -5   9  543.55   13.11
  -1   5   9  718.51   11.94
   1  -5  -9  686.54   11.83
   1  -5  -8  171.53    7.25
   1   5  -8  184.33    5.11
  -1  -5   8  134.20    6.40
  -1   5   8  136.71    5.79
  -1  -5   8  131.74    4.86
   1   5  -8  180.19    7.91
   1  -5  -8  173.06    5.62
  -1   5   8  181.12    5.77
  -1  -5   8  144.65    6.54
  -1  -5   8  145.78    6.22
  -1  -5   7  901.30   15.45
   1  -5  -7  725.37   10.71
   1  -5  -7  722.42   14.33
  -1  -5   7  854.93   14.68
  -1  -5   7  832.97   11.96
  -1   5   7  829.98   14.03
   1   5  -7  734.80   15.39
  -1   5   7  726.72   11.13
   1   5  -7  773.19    9.73
  -1  -5   7  838.33   15.47
  -1  -5   6   43.58    3.26
  -1  -5   6   39.13    3.06
   1   5  -6   24.13    1.58
  -1  -5   6   45.36    2.78
  -1  -5   6   43.04    3.46
   1  -5  -6   22.94    1.76
  -1   5   6   39.02    3.05
   1  -5  -6   23.05    2.61
   1   5  -6   23.26    2.71
  -1   5   6   18.87    1.79
  -1   5   5   50.66    2.82
   1  -5  -5   53.51    2.47
  -1  -5   5   80.45    3.65
   1   5  -5   54.63    2.12
   1   5  -5   51.54    3.92
  -1  -5   5   87.34    4.48
  -1  -5   5   83.34    4.63
  -1  -5   5   79.08    4.26
   1  -5  -5   55.01    3.81
  -1  -5   4  899.94   13.53
   1   5  -4  902.62   15.78
   1   5  -4  874.71    7.65
  -1   5   4  910.20   11.66
  -1  -5   4  878.46   13.96
   1  -5  -4  836.25    8.63
  -1  -5   4  839.39   11.72
   1  -5  -4  853.92   14.18
   1  -5  -3   12.11    0.94
   1   5  -3   12.81    1.92
  -1  -5   3   14.56    1.86
  -1   5   3   14.85    1.56
   1   5  -3    9.67    0.68
   1  -5  -3   12.46    1.77
  -1  -5   3   13.36    1.52
  -1  -5   3   13.03    1.66
  -1  -5   2  238.24    6.29
  -1   5   2  263.86    6.25
   1   5  -2  265.92    8.05
   1  -5  -2  258.28    6.25
   1  -5  -2  269.10    7.06
   1  -5  -2  240.50    7.01
  -1  -5   2  258.27    6.68
  -1  -5   1 4026.15   25.64
   1   5  -1 4584.10   32.95
   1  -5  -1 4005.81   25.29
  -1   5   1 4547.85   26.31
   1  -5  -1 4022.05   27.36
  -1  -5   0   53.19    2.89
  -1   5   0   32.58    2.34
   1   5   0   33.33    2.81
  -1  -5   0   31.50    2.00
  -1  -5   0   37.08    2.66
   1  -5   0   56.03    3.09
   1  -5   0   52.13    3.14
   1   5   1 1954.10   20.99
  -1  -5  -1 1781.09   15.89
   1  -5   1 1745.51   18.01
   1  -5   1 1721.20   18.39
  -1  -5  -1 1942.71   19.95
  -1  -5  -1 1859.65   15.95
  -1   5  -1 1914.86   18.03
  -1   5  -2  366.18    8.38
   1  -5   2  387.51    8.89
   1  -5   2  379.22    8.72
  -1  -5  -2  355.62    7.34
   1   5   2  357.94    8.95
  -1  -5  -2  386.98    9.22
  -1  -5  -2  403.98    7.34
  -1  -5  -3 1315.76   17.68
   1   5   3 1268.84   16.88
   1  -5   3 1276.70   16.54
  -1  -5  -3 1338.12   13.04
  -1  -5  -3 1211.73   14.11
  -1   5  -3 1306.81   16.46
   1  -5   3 1242.86   16.31
   1  -5   4 1141.02   14.73
   1  -5   4 1216.84   16.66
  -1   5  -4 1236.46   16.72
  -1  -5  -4 1333.15   12.96
  -1  -5  -4 1078.93    9.80
   1  -5   4 1133.48   16.22
   1   5   4 1169.41   16.41
  -1  -5  -4 1147.18   14.49
  -1  -5  -4 1263.39   17.79
  -1  -5  -5 1327.54   18.57
  -1  -5  -5 1200.58   15.61
  -1  -5  -5 1150.61   11.53
   1  -5   5 1141.65   16.82
   1  -5   5 1130.75   14.81
   1  -5   5 1098.32   16.33
   1   5   5 1242.48   16.99
   1  -5   5 1238.14   17.39
   1  -5   6   45.80    3.46
   1   5   6   33.65    2.85
  -1  -5  -6   32.34    2.13
   1  -5   6   39.99    3.25
  -1  -5  -6   34.79    2.82
  -1  -5  -6   40.89    3.39
   1  -5   6   43.62    2.94
   1  -5   6   44.81    3.45
   1  -5   7    1.18    0.83
  -1  -5  -7    2.97    0.84
  -1  -5  -7    4.47    1.14
   1   5   7    4.90    1.21
   1  -5   7    0.94    0.52
   1  -5   7    1.73    0.82
   1  -5   7    1.82    0.78
  -1  -5  -7    3.25    0.80
  -1  -5  -8   69.27    4.55
   1  -5   8   48.15    3.83
  -1  -5  -8   63.09    4.11
   1  -5   8   55.28    4.00
   1  -5   8   51.41    3.29
  -1  -5  -8   56.52    3.23
   1   5   8   67.81    4.18
   1  -5   8   52.78    3.92
   1  -5   9   90.40    5.30
  -1  -5  -9  158.34    5.66
  -1  -5  -9  164.29    6.86
   1  -5   9   89.00    5.30
  -1  -5  -9  176.79    7.38
   1   5   9  194.81    7.19
  -1  -5 -10   49.61    3.97
   1   5  10   51.44    3.80
   1  -5  10   44.40    3.86
   1  -5  10   43.49    3.78
  -1  -5 -10   50.83    3.99
   1  -5  10   43.90    3.11
   1  -5  10   40.77    3.70
  -1  -5 -10   47.38    3.23
  -1   5 -10   44.40    3.05
   1  -5  11  368.83   11.55
  -1   5 -11  404.76    9.49
   1   5  11  398.97   10.84
   1   5  11  330.30    8.55
  -1  -5 -11  371.02    9.46
   1  -5  11  353.91    8.99
   1  -5  11  372.63   11.48
  -1  -5 -11  403.20   11.54
  -1  -5 -11  416.89   11.81
   1  -5  11  351.66   11.27
   1  -5  12   43.03    4.12
  -1   5 -12   28.29    2.64
   1   5  12   23.99    2.79
  -1  -5 -12   32.03    2.89
   1   5  12   40.16    3.03
  -1   5 -12   28.27    1.96
  -1  -5 -12   32.14    3.32
   1  -5  12   44.43    3.31
  -1  -5 -12   32.33    3.41
   1  -5  12   41.30    4.04
   1  -5  12   42.12    4.04
  -1   5 -13  328.96    6.51
   1  -5  13  252.77   10.31
  -1  -5 -13  315.82   10.72
   1   5  13  324.20   10.36
  -1  -5 -13  324.05   10.56
   1  -5  13  254.30   10.08
   1  -5  13  252.78    8.04
   1   5  13  241.51    7.46
  -1   5 -13  321.78    9.17
   1  -5  13  278.53   10.77
  -1  -5 -13  302.57    9.10
   1   5  14  132.42    6.83
   1  -5  14  108.13    7.02
   1  -5  14  109.09    5.50
   1  -5  14  111.18    6.84
   1  -5  14  118.88    7.33
  -1   5 -14  136.40    4.15
  -1  -5 -14  130.87    6.72
  -1   5 -14  133.01    6.09
  -1   5 -14  126.25    5.12
  -1  -5 -14  137.72    7.30
   1   5  14  102.20    4.91
  -1  -5 -14  123.33    5.99
  -1   5 -15  637.53    8.79
   1  -5  15  632.83   16.40
  -1  -5 -15  629.85   14.85
   1  -5  15  590.15   16.78
  -1  -5 -15  601.47   13.63
   1  -5  15  612.36   13.27
   1  -5  15  632.42   17.65
   1   5  15  567.16   11.66
  -1   5 -15  628.64   13.69
  -1   5 -15  599.66   11.55
   1   5  15  598.13   14.90
  -1  -5 -15  628.86   16.15
  -1   5 -16  238.10    7.46
  -1   5 -16  245.63    5.35
   1  -5  16  254.31   10.62
  -1   5 -16  246.26    8.80
  -1  -5 -16  238.36    9.19
   1  -5  16  251.56   11.54
   1   5  16  225.49    9.48
   1  -5  16  244.48   11.19
   1   5  16  227.30    7.46
  -1  -5 -16  245.65   10.23
  -1  -5 -16  230.54    8.73
   1  -5  16  253.15    8.87
  -1   5 -17   63.04    2.72
   1  -5  17   49.96    4.09
  -1  -5 -17   59.07    4.60
   1  -5  17   45.37    5.03
  -1   5 -17   55.80    3.79
   1  -5  17   52.17    5.56
   1   5  17   46.84    3.45
  -1  -5 -17   57.35    5.02
  -1  -5 -17   59.46    4.51
  -1   5 -17   64.52    4.71
   1  -5  17   53.13    5.02
   1  -5  18   53.39    5.65
   1  -5  18   60.43    4.59
   1   5  18   54.85    3.74
  -1   5 -18   45.11    4.06
   1  -5  18   60.40    6.30
  -1  -5 -18   47.36    4.18
  -1   5 -18   47.28    3.56
   1   5  18   58.57    3.18
  -1  -5 -18   46.47    4.09
  -1  -5 -18   48.51    4.71
   1  -5  18   60.32    5.44
   1  -5  19 1149.38   26.61
  -1   5 -19 1304.47   19.13
   1  -5  19 1224.55   24.44
   1  -5  19 1213.11   21.24
  -1  -5 -19 1311.97   24.90
  -1  -5 -19 1308.88   21.93
   1   5  19 1083.26   16.97
   1  -5  19 1185.78   28.15
  -1   5 -19 1433.49   23.09
  -1  -5 -19 1310.86   22.02
  -1  -5 -20  290.98   10.44
  -1   5 -20  310.43   10.94
   1  -5  20  334.69   15.56
   1  -5  20  331.99   14.67
   1   5  20  304.87    9.13
   1  -5  20  350.66   11.84
  -1  -5 -20  292.29   11.87
  -1   5 -20  309.68    9.62
  -1  -5 -20  283.29   10.43
   1  -5  20  355.43   13.36
  -1  -5 -21  278.76   10.35
  -1  -5 -21  271.94   10.43
  -1   5 -21  275.40    9.27
   1  -5  21  320.10   12.91
   1  -5  21  310.55   15.56
  -1  -5 -21  276.63   11.71
   1   5  21  281.89    8.93
  -1   5 -21  286.23   10.79
   1  -5  21  297.21   14.35
   1  -5  22  223.97   10.94
   1  -5  22  212.98   12.49
   1  -5  22  208.80   13.21
  -1   5 -22  210.91    8.25
  -1  -5 -22  205.03    9.23
  -1  -5 -22  203.57    8.92
  -1   5 -22  225.13    9.77
  -1  -5 -22  202.11   10.04
  -1  -5 -23  468.78   15.42
   1  -5  23  553.84   17.36
   1  -5  23  512.38   21.45
  -1  -5 -23  500.63   14.73
  -1  -5 -23  472.77   13.70
  -1   5 -23  499.79   12.90
  -1   5 -23  526.27   15.15
   1  -5  23  501.15   19.53
   1  -5  24   91.46    8.57
  -1  -5 -24   69.21    6.01
  -1   5 -24   72.60    5.82
   1  -5  24  100.35    7.56
  -1   5 -24   72.76    5.01
   1  -5  24   87.61    9.17
  -1  -5 -24   67.53    5.54
  -1  -5 -24   62.33    5.05
  -1   5 -25  545.45   13.96
   1  -5  25  518.21   20.77
  -1   5 -25  580.78   16.67
   1  -5  25  532.65   22.86
  -1  -5 -25  496.61   14.33
  -1  -5 -25  540.45   16.01
   1  -5  25  564.85   18.08
  -1  -5 -25  520.23   16.70
   1  -5  26   96.85   10.05
  -1  -5 -26   78.07    6.66
   1  -5  26   94.32    9.03
   1  -5  26  100.69    7.75
  -1  -5 -26   79.01    6.29
  -1   5 -26   76.57    5.32
  -1  -5 -26   73.78    5.58
  -1   5 -26   81.18    6.33
  -1  -5 -27  105.85    7.33
   1  -5  27   94.79    9.20
   1  -5  27   98.99   10.28
   1  -5  27  107.81    8.10
  -1  -5 -27  105.42    7.81
  -1  -5 -27  104.55    6.66
  -1   5 -27  119.88    7.96
  -1   5 -27  107.55    6.40
   1  -5  28   17.28    4.37
  -1  -5 -28   13.81    2.74
  -1  -5 -28   16.84    3.19
   1  -5  28   16.66    3.25
   1  -5  28   14.85    3.92
  -1   5 -28   14.23    2.82
  -1   5 -28   14.34    2.39
  -1  -5 -29  326.41   14.06
   1  -5  29  353.44   18.55
  -1   5 -29  373.66   14.50
  -1   5 -29  360.80   12.11
   1  -5  29  381.86   15.68
  -1  -5 -29  344.13   13.80
   1  -5  29  379.24   21.09
  -1  -5 -30    2.95    0.72
   1  -5  30    3.21    1.76
   1  -5  30    2.89    0.68
  -1  -5 -30    1.88    0.88
   1  -5  30    3.15    1.54
   1  -5  30    2.88    0.88
  -1   5 -30    4.36    1.39
   1  -5  30    3.04    1.97
  -1   5 -30    3.53    1.41
  -1  -5 -30    3.02    1.57
   1   5  30    3.21    0.96
   1   5  30    2.64    0.77
  -1  -5 -31    1.75    1.06
   1  -5  31    4.64    2.66
  -1  -5 -31    1.10    0.85
   1  -5  31    1.33    0.53
   1  -5  31    2.20    0.84
   1  -5  31    3.54    1.72
   1  -5  31    1.07    0.87
   1   5  31    0.75    0.70
  -1   5 -31    1.12    0.74
   1   5  31    3.88    0.82
   1  -5  31    3.49    2.13
  -1  -5 -31    0.34    0.38
   1   5  31    1.33    0.71
  -1   5 -31    1.80    0.93
  -1  -5 -32    3.02    1.27
   1  -5  32    3.52    0.91
   1   5  32    2.65    0.72
   1  -5  32    3.22    0.97
   1  -5  32    2.83    1.75
  -1   5 -32    1.49    0.85
   1  -5  32    3.22    1.55
  -1   5 -32    3.38    1.65
   1  -5  32    3.17    2.60
   1   5  32    3.96    1.06
   1  -5  32    4.00    0.89
  -1  -5 -32    3.58    0.84
   1   5  32    3.43    0.93
  -1  -5 -32    2.09    1.17
  -1  -5 -33   91.22    7.83
  -1  -5 -33  102.22    7.94
   1  -5  33   95.01    4.67
   1  -5  33  102.37   11.55
   1  -5  33   99.24    4.17
  -1  -5 -33  116.23    4.64
   1   5  33   88.25    3.87
  -1   5 -33  101.50    6.77
   1  -5  33   99.44   10.41
  -1   5 -33  115.18    8.72
   1   5  33  102.02    4.63
   1  -5  33  105.41    8.45
   1   5  33  100.85    4.67
   1  -5  33   95.47    5.00
   1   5  33  105.98    5.29
   1  -5  34    1.30    0.66
  -1  -5 -34    0.14    0.93
  -1   5 -34   -0.57    0.92
   1   5  34    0.74    0.45
   1   5  34    0.44    0.34
  -1  -5 -34    0.73    0.81
   1  -5  34    1.55    0.85
   1  -5  34    1.08    0.48
   1   5  34    1.06    0.68
  -1  -5 -34    0.24    0.39
   1  -5  34    1.32    2.29
   1  -5  34    2.53    1.67
   1  -5  35  297.48    8.28
  -1  -5 -35  295.72   13.80
  -1  -5 -35  347.90    8.07
   1  -5  35  288.78    7.11
   1   5  35  297.14    8.15
   1  -5  35  302.24    8.86
   1   5  35  306.32    8.36
  -1  -5 -35  280.56   13.85
   1  -5  35  305.32   18.51
  -1   5 -35  321.73   14.82
   1  -5  35  313.37   20.60
   1   5  35  308.59    9.16
   1   5  36    0.54    0.77
   1  -5  36    3.87    1.07
  -1  -5 -36    1.07    0.77
  -1  -5 -36    2.87    0.79
  -1   5 -36    4.13    1.75
   1   5  36    3.17    0.95
   1   5  36    3.17    1.07
   1  -5  36    2.27    1.98
   1   5  36    3.37    1.00
   1  -5  36    2.76    0.91
   1  -5  36    1.50    0.89
   1  -5  36    2.81    0.79
  -1  -5 -36    3.51    1.57
   1   5  37    8.96    1.54
   1   5  37    8.73    1.43
  -1  -5 -37   10.44    1.47
   1  -5  37    8.53    1.40
   1  -5  37    9.04    1.66
   1   5  37    9.18    1.60
   1  -5  38   70.90    4.08
  -1  -5 -38   70.48    3.65
   1  -5  38   67.04    4.20
   1   5  38   63.03    4.13
   1   5  38   69.99    4.06
   1   5  38   66.52    3.86
   1   5  39  179.92    6.25
   1  -5  39  176.77    6.40
   1   5  39  179.39    6.91
   1  -5  39  178.21    6.77
   1   5  39  186.30    6.58
   1   5  40   12.42    1.85
   1  -5  40   12.24    1.80
   1   5  40   12.13    1.65
  -1  -5 -40   12.77    1.62
   1   5  40   12.34    1.77
   1  -5  40   13.37    1.80
   1   5  41    0.17    0.42
  -1  -5 -41    1.42    0.65
   1   5  41    1.84    0.79
   1   5  41    0.62    0.45
   1  -5  41    1.68    0.58
   1  -5  41    2.13    0.75
   1   5  42    1.38    0.69
   1  -5  42    1.02    0.43
   1   5  42    2.20    0.76
  -1  -5 -42    2.27    0.73
   1  -5  42    2.41    0.99
   1   5  42    1.91    0.76
  -1  -5 -43   53.01    3.01
   1   5  43   54.15    3.43
   1   5  43   49.36    3.37
   1  -5  43   56.72    3.38
   1   5  43   54.00    3.26
   1  -5  43   54.07    3.52
  -1  -5 -44   24.62    1.99
   1  -5  44   26.35    2.29
   1   5  44   20.69    2.12
   1   5  44   26.44    2.39
   1   5  44   24.35    2.13
   1  -5  44   23.56    2.25
   1   5  45   78.11    3.94
   1  -5  45   82.53    4.02
   1   5  45   85.26    3.87
  -1  -5 -45   92.43    3.71
   1  -5  45   89.37    4.07
   1   5  45   90.62    4.22
   1   5  46    4.52    0.89
   1  -5  46    3.58    0.85
   1   5  46    4.29    1.01
   1  -5  46    3.58    0.92
  -1  -5 -46    4.78    0.80
   1   5  46    2.92    0.76
   1   5  47   15.67    1.54
  -1  -5 -47   20.60    1.61
   1   5  47   16.29    1.62
   1  -5  47   14.96    1.56
   1  -5  47   15.58    1.65
   1   5  47   16.31    1.71
   1   5  48   10.00    1.19
  -1  -5 -48   11.41    1.12
   1  -5  48   10.26    1.31
   1   5  48   10.87    1.26
   1   5  48    9.21    1.24
   1  -5  48    9.41    1.22
   1  -5  49   97.60    3.61
   1  -5  49  101.76    3.64
   1   5  49   91.86    3.21
   1   5  49   98.79    3.45
   1   5  49  102.29    3.82
   1  -5  50    1.52    0.41
   1   5  50    2.04    0.50
   1  -5  50    2.81    0.66
   1   5  50    1.70    0.49
   1   5  51   46.83    1.99
   1  -5  51   45.87    2.01
   1  -5  51   46.33    2.16
   1   5  51   47.85    2.29
   1   5  52   -0.01    0.21
   1   5  52   -0.07    0.14
   1  -5  53   38.88    1.60
   1   5  53   33.97    1.58
  -1  -7  52    2.64    0.45
  -1   7  52    2.12    0.38
  -1   7  51    0.26    0.22
  -1  -7  51    0.40    0.27
  -1   7  51    0.33    0.28
  -1   7  50   53.26    2.30
  -1   7  50   46.55    2.15
  -1  -7  50   54.00    2.36
  -1   7  50   47.66    2.10
  -1   7  49   62.14    2.75
  -1   7  49   64.52    2.65
   1  -7 -49   66.56    2.47
  -1  -7  49   66.14    2.82
  -1   7  49   68.00    2.81
   1  -7 -48   17.89    1.40
  -1   7  48   16.72    1.54
  -1   7  48   20.78    1.68
  -1  -7  48   20.28    1.70
  -1   7  48   18.27    1.55
   1  -7 -47    0.05    0.24
  -1   7  47    0.85    0.44
  -1   7  47    0.21    0.32
  -1  -7  47    0.44    0.36
  -1   7  47    0.35    0.36
   1  -7 -46    0.99    0.41
  -1   7  46    0.70    0.36
  -1  -7  46   -0.06    0.34
  -1   7  46    0.47    0.40
  -1   7  46    0.59    0.39
  -1  -7  46    1.12    0.52
  -1  -7  45    2.27    0.74
   1  -7 -45    2.07    0.57
  -1   7  45    2.46    0.76
  -1   7  45    2.08    0.73
  -1   7  45    2.98    0.81
  -1  -7  45    2.07    0.68
  -1   7  45    2.55    0.51
  -1  -7  44    8.43    1.31
  -1   7  44    7.71    1.28
  -1   7  44    7.06    1.15
   1  -7 -44    9.49    1.21
  -1   7  44    6.18    0.83
  -1   7  44    7.46    1.23
  -1  -7  44    7.27    1.24
  -1  -7  43   27.25    2.41
  -1   7  43   24.59    2.23
  -1   7  43   22.10    1.70
  -1   7  43   22.23    2.28
   1  -7 -43   22.67    1.98
  -1  -7  43   22.72    2.20
  -1   7  43   24.34    2.21
  -1   7  42  131.41    4.30
  -1   7  42  138.85    5.38
  -1   7  42  144.08    5.42
  -1   7  42  128.66    5.54
  -1  -7  42  145.31    5.68
  -1  -7  42  130.72    5.40
   1  -7 -42  134.88    4.84
  -1   7  41   38.71    2.41
  -1  -7  41   44.84    3.22
  -1   7  41   43.34    3.10
  -1   7  41   43.02    3.04
  -1  -7  41   40.22    3.14
  -1   7  41   41.99    3.24
   1  -7 -41   43.73    2.85
  -1   7  40    2.42    0.85
  -1   7  40    3.65    0.89
  -1  -7  40    4.25    1.10
  -1  -7  40    4.55    1.17
  -1   7  40    4.59    0.99
   1  -7 -40    3.39    0.85
  -1   7  40    4.65    0.97
   1  -7 -39   93.64    4.25
  -1   7  39   85.55    4.77
  -1   7  39   87.69    4.47
  -1  -7  39   83.03    4.67
  -1  -7  39   84.45    4.61
  -1   7  39   87.64    4.50
  -1   7  39   76.02    3.59
  -1   7  38    6.44    1.07
  -1   7  38    5.99    1.21
   1  -7 -38    7.37    1.24
  -1   7  38    7.37    1.41
  -1   7  38    6.80    1.43
  -1  -7  38    6.94    1.45
  -1  -7  38    5.32    1.26
  -1   7  37    6.40    1.32
  -1   7  37    6.62    1.25
   1  -7 -37    6.02    1.11
  -1   7  37    5.38    1.30
  -1  -7  37    5.90    1.42
  -1   7  37    6.93    1.13
  -1  -7  37    6.51    1.28
  -1   7  36    4.05    1.09
  -1   7  36    4.41    0.92
  -1  -7  36    4.74    1.25
  -1  -7  36    2.94    1.15
   1  -7 -36    2.56    0.76
  -1   7  36    3.70    0.98
  -1   7  36    4.51    1.21
  -1  -7  35   94.06    5.15
  -1  -7  35   95.02    5.13
  -1   7  35   86.86    4.03
  -1   7  35  104.83    5.47
   1  -7 -35  109.38    4.69
  -1   7  35   99.30    4.84
  -1   7  35   98.05    4.87
  -1   7  34   21.55    2.30
  -1   7  34   21.99    2.59
  -1   7  34   20.68    1.99
   1  -7 -34   20.13    2.02
   1  -7 -34   18.46    3.91
  -1  -7  34   22.95    2.52
  -1   7  34   21.10    2.24
  -1  -7  34   26.78    5.90
  -1  -7  34   24.56    5.73
  -1   7  33  241.18    8.29
   1  -7 -33  251.99    7.06
  -1  -7  33  226.66    7.80
  -1   7  33  229.67    7.35
  -1  -7  33  240.19   17.78
  -1   7  33  220.78    6.46
   1  -7 -33  221.56   13.55
   1  -7 -33  222.04   12.34
  -1   7  33  235.29    7.42
  -1  -7  33  243.26   17.68
   1  -7 -32   22.63    3.88
  -1   7  32   25.50    2.66
  -1  -7  32   24.60    5.68
  -1  -7  32   23.95    2.05
  -1   7  32   23.67    2.35
  -1   7  32   22.87    2.29
   1   7 -32   25.53    4.04
   1  -7 -32   24.67    4.57
  -1  -7  32   22.96    2.53
  -1  -7  32   23.01    5.37
  -1   7  32   22.61    2.06
   1  -7 -32   24.58    2.23
  -1   7  31   16.16    1.91
  -1   7  31   16.17    1.76
  -1  -7  31   18.36    1.78
  -1   7  31   17.14    2.22
   1  -7 -31   19.02    1.93
  -1  -7  31   21.04    5.07
  -1  -7  31   18.52    4.67
   1  -7 -31   15.43    3.68
   1  -7 -31   17.11    3.44
   1   7 -31   17.33    3.30
  -1  -7  31   15.87    2.20
  -1   7  31   17.07    1.96
   1   7 -30   26.42    4.15
  -1  -7  30   26.18    2.64
   1  -7 -30   25.69    2.27
  -1   7  30   24.68    2.44
  -1  -7  30   23.79    2.00
  -1   7  30   23.78    2.28
  -1  -7  30   30.45    6.03
   1  -7 -30   22.80    4.33
  -1  -7  30   30.48    6.19
   1  -7 -30   26.46    4.29
  -1   7  30   26.35    2.70
  -1   7  30   22.92    2.10
  -1  -7  29  219.63    7.50
   1  -7 -29  220.79   11.89
  -1  -7  29  215.74    5.90
  -1   7  29  216.37    6.71
   1   7 -29  231.67   11.75
   1  -7 -29  215.27   13.12
  -1   7  29  239.22    7.98
  -1   7  29  211.62    6.19
  -1  -7  29  231.16   16.57
  -1   7  29  224.59    7.00
   1  -7 -29  256.79    6.93
  -1  -7  29  232.61   16.65
   1   7 -28  316.27   13.54
  -1  -7  28  340.27    9.26
  -1   7  28  340.65    8.55
   1  -7 -28  336.51    7.92
  -1  -7  28  327.44    7.19
  -1  -7  28  351.73   19.98
  -1  -7  28  374.34   20.80
   1  -7 -28  297.90   15.53
  -1   7  28  322.17    7.58
   1  -7 -28  309.09   13.96
  -1   7  28  329.42    9.24
  -1  -7  27   10.34    1.62
   1  -7 -27    8.69    1.32
   1  -7 -27    7.72    2.51
  -1  -7  27   14.20    3.99
  -1   7  27   10.23    1.59
   1  -7 -27    6.77    1.93
  -1  -7  27   11.13    3.78
   1   7 -27    8.86    2.35
  -1   7  27   10.26    1.47
  -1  -7  26    1.44    1.85
   1  -7 -26    1.92    1.24
   1  -7 -26    2.27    1.53
  -1  -7  26    2.07    1.42
   1   7 -26    0.44    0.36
  -1  -7  26    0.51    1.13
  -1  -7  25   84.13    9.31
  -1  -7  25   80.25    9.02
   1  -7 -25   78.68    6.75
  -1  -7  25   84.94    7.88
   1  -7 -25   83.30    8.00
   1   7 -25   88.50    6.73
  -1   7  24  246.34   10.40
  -1  -7  24  266.20   16.38
   1  -7 -24  252.11   11.87
   1  -7 -24  252.57   13.91
  -1  -7  24  266.07   15.94
  -1  -7  24  282.87   14.29
   1   7 -24  262.81   11.28
  -1  -7  23   38.78    5.25
  -1   7  23   35.93    3.92
  -1  -7  23   43.37    6.51
   1  -7 -23   41.60    4.76
   1   7 -23   46.81    4.64
  -1  -7  23   41.96    6.26
   1  -7 -23   41.42    5.79
   1  -7 -22  518.60   16.50
  -1  -7  22  699.86   24.48
  -1   7  22  597.26   15.80
  -1  -7  22  685.74   25.21
  -1  -7  22  693.65   21.88
   1  -7 -22  567.66   20.39
  -1  -7  22  699.14   17.37
   1   7 -22  576.85   15.95
   1   7 -21   71.27    5.47
  -1  -7  21   72.63    7.62
  -1   7  21   61.96    5.08
  -1  -7  21   65.47    7.66
   1  -7 -21   70.69    7.10
   1  -7 -21   63.02    5.65
  -1  -7  21   70.81    6.98
  -1  -7  21   72.40    5.47
  -1  -7  20    3.54    1.33
   1   7 -20    8.93    1.95
  -1  -7  20    3.28    1.74
  -1  -7  20    4.26    2.08
  -1   7  20    4.36    1.28
  -1  -7  20    2.78    1.52
   1  -7 -20    8.32    2.07
   1  -7 -20    8.64    2.57
  -1  -7  19  316.56   14.95
  -1  -7  19  318.81   15.91
   1  -7 -19  269.62   13.37
  -1  -7  19  323.97   14.45
  -1  -7  19  311.33   10.61
   1   7 -19  271.68   10.16
  -1   7  19  273.49   10.35
   1  -7 -19  242.85   10.61
   1   7 -18  374.25    9.00
   1  -7 -18  338.49   12.24
  -1   7  18  342.39   11.46
  -1  -7  18  373.39   11.31
   1   7 -18  387.72   11.76
  -1  -7  18  392.68   16.24
   1  -7 -18  360.50   15.24
  -1  -7  18  395.65   17.35
  -1  -7  18  392.62   15.78
   1   7 -17  177.18    6.04
  -1  -7  17  162.12    7.31
  -1  -7  17  179.05   10.61
  -1  -7  17  170.26   10.21
   1  -7 -17  161.11    8.20
   1   7 -17  173.23    7.54
   1  -7 -17  171.36   10.31
  -1   7  17  153.92    7.63
  -1  -7  17  174.07   11.21
   1  -7 -16    4.60    1.42
  -1  -7  16    1.59    1.41
  -1  -7  16    1.08    0.72
   1   7 -16    3.29    1.07
   1  -7 -16    3.82    1.67
   1   7 -16    2.16    0.67
  -1  -7  16    0.61    1.09
  -1  -7  16    1.42    1.10
  -1   7  16    1.53    0.92
  -1  -7  15  381.78   14.74
   1   7 -15  453.46   16.90
   1  -7 -15  438.43   12.70
  -1  -7  15  401.79   14.83
   1  -7 -15  437.53   15.86
  -1  -7  15  391.72   15.58
   1   7 -15  463.89    9.31
  -1  -7  15  370.57   10.48
  -1   7  15  343.80   11.19
   1   7 -15  470.30   11.47
   1   7 -14   34.25    4.69
  -1  -7  14   39.11    3.33
  -1   7  14   35.35    3.46
   1   7 -14   40.11    3.26
  -1  -7  14   43.28    5.09
  -1  -7  14   42.38    4.87
   1  -7 -14   39.52    4.71
   1   7 -14   43.19    2.76
  -1   7  14   38.20    3.70
  -1  -7  14   42.81    4.76
   1  -7 -14   35.55    3.53
   1  -7 -13  448.81   11.87
  -1  -7  13  553.74   17.40
  -1   7  13  508.88   13.42
  -1  -7  13  544.13   16.23
   1   7 -13  526.94    9.16
  -1  -7  13  519.57   16.36
  -1  -7  13  513.93   11.81
   1   7 -13  519.41   11.08
   1  -7 -13  487.88   15.87
  -1   7  13  472.58   12.06
   1   7 -13  474.67   16.46
   1   7 -12    1.86    0.63
  -1  -7  12    0.71    0.83
  -1  -7  12    2.28    1.49
  -1   7  12    2.32    0.88
   1   7 -12    0.86    0.31
  -1  -7  12    1.55    0.77
   1  -7 -12    1.30    0.92
  -1   7  12    0.24    0.38
   1  -7 -12    0.90    0.27
  -1  -7  12    1.05    0.56
   1   7 -12    0.42    0.60
  -1  -7  11   69.85    4.23
   1   7 -11   45.49    4.88
  -1  -7  11   77.57    6.10
  -1   7  11   46.04    3.56
  -1   7  11   71.40    4.98
   1   7 -11   56.99    2.84
  -1  -7  11   70.74    5.78
   1  -7 -11   51.72    5.08
   1   7 -11   53.91    3.22
   1  -7 -11   46.50    3.43
  -1  -7  11   74.24    5.69
  -1  -7  10 1118.36   22.41
  -1   7  10 1092.24   19.40
  -1  -7  10 1092.92   16.56
   1   7 -10 1049.44   22.72
   1  -7 -10 1037.68   21.52
   1  -7 -10  974.56   14.86
   1   7 -10 1141.19   13.71
  -1   7  10 1067.78   16.55
  -1  -7  10 1161.49   21.71
  -1  -7  10 1201.66   22.94
  -1   7   9 1501.17   22.57
  -1  -7   9 1633.69   25.68
   1  -7  -9 1537.67   25.90
  -1  -7   9 1516.85   24.20
   1   7  -9 1706.30   15.51
   1  -7  -9 1480.80   17.19
  -1   7   9 1623.03   19.92
   1   7  -9 1613.84   27.62
  -1  -7   9 1485.19   25.10
  -1  -7   9 1469.69   18.91
   1  -7  -8  303.18    7.16
  -1   7   8  343.10   10.67
   1   7  -8  347.45    6.50
   1  -7  -8  312.44   11.29
  -1  -7   8  341.23    9.08
   1   7  -8  329.08   12.21
  -1  -7   8  383.02   12.08
  -1   7   8  331.03    8.84
  -1  -7   8  355.85   11.49
   1   7  -7  192.43    4.26
  -1   7   7  199.42    6.73
  -1  -7   7  193.09    8.22
   1   7  -7  205.42    9.46
   1  -7  -7  170.38    4.77
   1  -7  -7  192.36    8.55
  -1  -7   7  171.45    6.44
  -1   7   7  171.79    7.58
  -1  -7   7  188.58    8.22
   1   7  -6   11.73    2.26
  -1  -7   6    5.39    1.49
   1   7  -6    7.60    0.69
  -1  -7   6    5.32    1.18
   1  -7  -6    8.79    0.95
   1  -7  -6    9.11    1.92
  -1   7   6    6.97    1.63
  -1   7   6   12.79    1.73
  -1  -7   6    7.14    1.66
  -1  -7   5  130.95    6.65
   1   7  -5   74.91    5.38
  -1  -7   5  138.66    6.52
  -1  -7   5  128.44    5.56
  -1   7   5   74.37    4.12
   1  -7  -5   73.01    5.09
  -1   7   4  216.21    7.02
   1   7  -4  216.48    8.96
  -1  -7   4  274.53    8.15
  -1  -7   4  301.32    9.34
   1  -7  -4  198.60    8.01
  -1  -7   3  238.59    8.08
   1   7  -3  212.06    8.68
  -1   7   3  217.45    7.08
  -1  -7   3  215.54    7.26
   1   7  -2  369.68   11.31
  -1  -7   2  296.99    8.74
  -1  -7   2  267.59    8.17
   1  -7  -2  300.25    8.84
  -1   7   2  377.28    9.34
   1   7  -1 1928.57   25.21
   1  -7  -1 2028.25   23.00
  -1   7   1 1964.45   21.60
  -1  -7   1 2022.59   21.94
  -1  -7   1 1911.68   22.06
   1  -7  -1 1978.45   24.69
   1  -7   0  299.07    9.34
  -1  -7   0  309.08    9.14
  -1  -7   0  318.72    8.45
  -1   7   0  265.93    8.12
   1   7   0  267.98    9.35
   1  -7   0  314.15    9.14
  -1   7  -1 1079.43   16.76
   1  -7   1 1068.07   16.99
   1  -7   1 1021.19   17.01
   1  -7   1 1046.21   16.88
  -1  -7  -1 1085.70   15.22
   1   7   1 1068.48   18.46
  -1  -7  -2  283.38    7.62
   1  -7   2  273.41    8.80
   1  -7   2  284.04    9.06
  -1   7  -2  270.33    8.62
   1   7   2  267.26    9.19
   1  -7   2  260.84    8.54
  -1  -7  -3   63.84    3.58
  -1   7  -3   36.35    3.29
   1  -7   3   60.73    4.26
  -1  -7  -3   34.54    2.94
   1   7   3   35.66    3.37
   1  -7   3   57.11    4.41
   1  -7   3   58.97    4.05
   1  -7   3   60.24    4.34
  -1   7  -4  351.30   10.49
   1  -7   4  314.76   10.39
   1   7   4  357.53   10.59
   1  -7   4  327.48   10.23
   1  -7   4  303.22    9.11
  -1  -7  -4  315.86    9.10
   1  -7   4  318.30    9.91
   1  -7   5    1.30    0.77
   1  -7   5    2.73    1.04
   1  -7   5    1.13    0.58
   1  -7   5    1.57    0.79
   1   7   5    3.65    1.18
  -1   7  -5    2.35    0.34
  -1   7  -5    3.43    1.11
  -1  -7  -5    2.07    0.81
  -1  -7  -6   24.60    2.79
  -1   7  -6   27.43    1.50
   1  -7   6   29.87    3.33
   1  -7   6   29.11    3.33
   1  -7   6   29.76    2.88
  -1  -7  -6   18.26    1.19
   1   7   6   26.31    2.95
  -1   7  -6   24.37    3.02
  -1  -7  -6   27.79    3.25
   1  -7   6   34.61    3.48
  -1   7  -7  212.54    8.96
  -1  -7  -7  213.05    9.06
   1  -7   7  218.56    9.17
   1   7   7  203.02    8.09
  -1  -7  -7  196.20    8.04
   1  -7   7  220.77    8.99
   1  -7   7  211.53    8.90
  -1   7  -7  225.64    4.94
   1  -7   7  209.12    7.57
  -1  -7  -7  188.10    4.69
  -1  -7  -8  253.89    9.37
   1  -7   8  309.63   11.00
   1  -7   8  307.55    9.27
  -1   7  -8  326.75    6.62
   1   7   8  277.39    9.44
  -1   7  -8  288.44   10.85
   1  -7   8  310.40   11.28
  -1  -7  -8  274.81    6.50
  -1  -7  -8  291.59   10.85
   1  -7   8  325.76   11.32
   1   7   9  912.49   17.26
   1  -7   9  881.89   18.97
   1  -7   9  914.08   19.62
  -1  -7  -9  972.44   20.10
  -1   7  -9  954.74   20.30
   1  -7   9  886.70   19.42
   1  -7   9  843.86   15.40
  -1  -7  -9  914.08   12.92
  -1  -7  -9  867.59   17.89
  -1   7  -9  997.01   12.61
   1   7  10  629.27   14.60
   1  -7  10  631.65   16.56
   1  -7  10  658.81   17.25
  -1   7 -10  661.49   17.43
   1  -7  10  617.24   16.59
  -1  -7 -10  660.53   16.90
   1  -7  10  606.57   13.23
  -1  -7 -10  631.56   11.58
  -1  -7 -10  622.07   15.74
  -1  -7 -11  420.23   10.01
  -1  -7 -11  448.12   13.98
   1  -7  11  439.04   11.28
   1  -7  11  466.06   14.58
   1   7  11  405.37   11.94
  -1   7 -11  486.47   10.09
   1  -7  11  486.06   15.29
   1  -7  11  436.81   14.27
  -1  -7 -11  406.71   13.05
  -1  -7 -12    1.29    0.93
   1  -7  12    2.47    1.09
   1  -7  12    1.13    0.64
  -1  -7 -12    2.66    1.33
   1  -7  12    1.33    1.07
   1  -7  12    2.28    1.32
   1   7  12    0.96    0.72
   1   7  12    1.13    0.51
  -1   7 -12    2.62    0.95
  -1  -7 -12    1.34    0.68
   1  -7  13  236.25   11.36
   1   7  13  211.71    8.28
   1  -7  13  225.11   10.81
  -1  -7 -13  274.98   11.40
   1  -7  13  204.38    7.97
   1   7  13  290.81   10.48
  -1  -7 -13  291.37   11.61
  -1   7 -13  302.78    8.74
  -1  -7 -13  271.87    8.90
   1  -7  13  224.76   10.74
  -1   7 -14    1.13    0.51
   1  -7  14    3.51    1.68
  -1  -7 -14    2.72    1.44
  -1  -7 -14    2.00    1.27
   1   7  14    3.60    1.19
   1  -7  14    4.06    1.58
   1   7  14    1.97    1.09
  -1   7 -14    2.61    1.05
   1  -7  14    5.17    1.40
   1  -7  14    2.35    1.25
  -1  -7 -14    1.37    0.96
   1  -7  15  487.39   16.57
   1   7  15  444.18   12.13
  -1  -7 -15  457.32   14.51
   1  -7  15  459.72   12.29
   1   7  15  450.65   13.70
  -1  -7 -15  446.69   12.23
   1  -7  15  486.64   17.20
  -1   7 -15  499.43   12.04
   1  -7  15  473.28   16.58
  -1  -7 -15  471.49   15.69
  -1   7 -15  466.29   10.76
   1  -7  16  194.47    8.22
  -1  -7 -16  193.85   10.29
   1   7  16  183.66    7.86
  -1   7 -16  213.52    7.46
   1  -7  16  198.31   11.37
   1  -7  16  198.22   11.14
  -1  -7 -16  197.32    9.65
   1  -7  16  204.47   10.88
   1   7  16  195.74    9.17
  -1  -7 -16  190.09    8.17
  -1   7 -16  212.64    8.10
   1  -7  17    4.19    1.58
   1  -7  17    4.97    1.89
   1   7  17    4.10    1.19
  -1   7 -17    3.46    1.03
  -1   7 -17    2.54    0.88
  -1  -7 -17    3.28    1.49
   1   7  17    1.93    1.13
  -1  -7 -17    3.39    1.41
   1  -7  17    4.12    1.48
  -1  -7 -17    1.82    0.92
   1  -7  17    4.26    1.26
  -1   7 -18  281.24    8.97
   1  -7  18  307.35   13.82
  -1  -7 -18  272.50   12.61
  -1  -7 -18  253.54    9.85
   1  -7  18  287.46   10.49
   1  -7  18  301.30   14.98
   1   7  18  261.94    9.48
  -1  -7 -18  270.13   11.34
   1  -7  18  292.27   14.41
  -1   7 -18  288.16   10.03
   1  -7  19  251.69   13.80
   1   7  19  227.97    8.87
   1  -7  19  266.58   14.53
   1  -7  19  257.61   12.88
  -1  -7 -19  236.49    9.78
  -1   7 -19  262.72    9.79
   1  -7  19  250.59   10.04
  -1  -7 -19  239.85   10.71
  -1  -7 -19  244.93   12.29
  -1   7 -19  259.00    8.83
  -1   7 -20  246.03    8.80
  -1  -7 -20  245.82   12.56
   1   7  20  216.24    8.68
   1  -7  20  250.97   14.50
  -1  -7 -20  235.42   10.64
   1  -7  20  254.84   12.93
   1  -7  20  238.73   10.09
  -1  -7 -20  238.40   10.00
   1  -7  20  240.19   13.96
  -1   7 -20  263.05   10.08
   1  -7  21    2.52    1.64
  -1  -7 -21    1.68    1.02
  -1   7 -21    2.59    0.94
   1  -7  21    2.00    1.26
   1  -7  21    0.56    0.85
  -1  -7 -21    3.89    1.47
  -1  -7 -21    1.51    0.70
  -1   7 -21    3.19    1.24
   1   7  21    0.69    0.41
   1  -7  21    1.08    0.91
   1  -7  22  783.32   26.84
  -1  -7 -22  607.45   20.17
  -1   7 -22  674.57   15.16
   1  -7  22  750.75   26.28
   1  -7  22  801.41   23.62
  -1   7 -22  692.20   17.20
  -1  -7 -22  623.38   16.83
   1  -7  22  773.69   19.12
   1   7  22  686.14   15.71
   1  -7  23   52.26    7.16
   1  -7  23   51.25    5.11
  -1  -7 -23   65.75    6.71
   1  -7  23   51.75    6.10
   1  -7  23   50.78    6.97
  -1  -7 -23   64.39    5.51
  -1   7 -23   65.22    4.77
  -1   7 -23   75.27    5.81
  -1  -7 -24  181.17   11.19
  -1  -7 -24  189.28    9.61
   1  -7  24  188.15   13.96
   1  -7  24  206.43   14.36
  -1   7 -24  192.87    8.34
   1  -7  24  218.91   12.52
  -1   7 -24  200.95    9.75
   1  -7  25    9.30    3.02
  -1  -7 -25   20.05    3.77
  -1   7 -25   18.90    2.66
   1  -7  25   15.35    4.13
  -1  -7 -25   18.06    3.01
   1  -7  25   11.38    3.02
  -1   7 -25   23.29    3.40
  -1  -7 -26   40.71    5.40
  -1   7 -26   39.60    3.86
   1  -7  26   37.13    5.34
   1  -7  26   30.00    5.87
  -1   7 -26   47.41    4.97
  -1  -7 -26   46.00    4.89
   1  -7  26   32.75    5.94
   1  -7  27   34.80    2.93
   1  -7  27   34.28    5.14
   1  -7  27   31.02    5.65
   1  -7  27   28.35    6.00
  -1  -7 -27   43.59    4.84
   1   7  27   44.94    3.30
  -1  -7 -27   44.39    5.71
  -1  -7 -27   50.14    2.98
  -1   7 -27   50.09    5.18
   1   7  28   95.31    3.99
   1   7  28   99.97    5.00
   1   7  28   98.02    4.31
   1  -7  28   98.83   11.17
   1  -7  28   95.59    4.79
   1  -7  28  108.75    9.17
   1  -7  28   94.12    3.82
  -1  -7 -28  101.62    4.34
   1  -7  28  105.58   10.96
  -1  -7 -28   84.73    7.87
  -1   7 -28  103.11    7.60
  -1  -7 -28   94.85    7.27
   1   7  29  192.53    5.75
   1   7  29  211.96    6.47
  -1  -7 -29  198.67   12.14
  -1  -7 -29  220.53   11.27
   1  -7  29  199.27    7.08
   1  -7  29  210.94   16.43
   1  -7  29  218.38   13.14
   1  -7  29  205.89    5.71
  -1   7 -29  220.31   11.24
  -1  -7 -29  235.88    6.60
   1   7  29  225.78    7.60
   1  -7  29  215.27   16.06
  -1   7 -30   64.34    6.25
  -1  -7 -30   58.60    5.92
   1  -7  30   67.86    3.33
   1   7  30   65.07    4.16
  -1  -7 -30   62.00    3.44
   1  -7  30   65.22    9.31
  -1  -7 -30   57.15    6.49
   1  -7  30   75.70    7.85
   1  -7  30   71.88    4.25
   1   7  30   65.86    3.40
   1   7  30   66.92    3.72
   1  -7  30   77.57    9.77
   1   7  31   13.50    1.74
   1  -7  31   17.94    5.25
   1  -7  31   17.03    2.20
  -1  -7 -31   11.48    1.57
   1   7  31   16.00    1.70
  -1  -7 -31    9.28    2.78
  -1   7 -31   13.51    2.84
   1  -7  31   20.95    4.11
  -1  -7 -31   12.25    2.74
   1  -7  31   14.44    1.57
   1  -7  31   16.83    4.44
   1   7  31   12.96    1.92
   1  -7  32  180.50   12.10
   1  -7  32  170.90    5.41
   1   7  32  171.12    6.84
   1   7  32  179.00    6.20
   1   7  32  165.12    5.41
  -1  -7 -32  152.52   10.82
  -1  -7 -32  176.61    5.81
  -1  -7 -32  161.63   10.00
   1  -7  32  174.38   15.52
  -1   7 -32  169.33   10.42
   1  -7  32  181.73   15.08
   1  -7  32  176.91    6.73
  -1  -7 -33  593.23   10.66
   1  -7  33  560.04   26.60
   1   7  33  563.60   11.17
  -1   7 -33  563.70   19.33
   1   7  33  557.08   12.26
   1   7  33  520.18    9.65
   1  -7  33  540.79    9.67
   1  -7  33  556.63   11.93
   1  -7  33  586.50   21.77
   1   7  33  571.44   11.30
  -1  -7 -33  489.08   19.22
  -1  -7 -33  509.86   18.06
   1  -7  33  575.83   28.58
   1  -7  34   41.59    7.08
   1   7  34   32.91    2.45
   1   7  34   26.83    2.81
   1  -7  34   33.39    3.03
   1  -7  34   30.06    2.36
  -1  -7 -34   22.59    4.29
   1   7  34   30.71    2.67
   1   7  34   32.62    2.79
  -1  -7 -34   23.74    2.17
   1  -7  34   35.79    7.20
   1  -7  34   38.28    5.54
   1   7  35  186.57    6.60
   1   7  35  173.79    5.53
   1   7  35  189.66    6.51
   1  -7  35  178.53    5.55
  -1  -7 -35  200.77    6.24
   1   7  35  185.35    7.18
   1  -7  35  182.56    6.92
   1   7  36   10.54    1.72
   1   7  36    9.55    1.32
  -1  -7 -36   10.31    1.46
   1  -7  36   12.65    1.63
   1   7  36   11.12    1.66
   1  -7  36   12.19    1.94
   1   7  36   10.66    1.64
   1   7  37    4.76    1.11
   1  -7  37    5.34    1.20
  -1  -7 -37    4.31    0.93
   1   7  37    5.31    1.09
   1   7  37    4.69    0.91
   1   7  37    4.91    1.08
   1   7  38   12.19    1.82
  -1  -7 -38   13.42    1.61
   1   7  38   11.10    1.36
   1   7  38   13.13    1.75
   1  -7  38    9.33    1.60
   1   7  38   11.80    1.70
   1   7  39   50.98    2.81
   1  -7  39   53.94    3.67
   1   7  39   59.44    3.63
   1   7  39   57.44    3.89
   1   7  39   57.11    3.51
  -1  -7 -39   65.47    3.49
   1  -7  40    1.15    0.66
   1   7  40    0.14    0.39
   1   7  40    0.45    0.53
   1   7  40   -0.17    0.40
  -1  -7 -40    0.40    0.39
   1   7  40    0.90    0.43
   1   7  41    1.32    0.55
   1   7  41    1.31    0.59
   1  -7  41    1.30    0.41
  -1  -7 -41    1.18    0.64
   1   7  41    1.68    0.67
   1   7  41    1.46    0.52
   1   7  42   43.66    3.15
   1   7  42   50.41    3.17
  -1  -7 -42   44.43    2.77
   1  -7  42   52.44    3.42
   1   7  42   50.13    3.20
   1  -7  43   26.98    2.39
   1   7  43   22.71    2.23
  -1  -7 -43   24.06    1.99
   1   7  43   26.93    2.25
   1   7  43   26.05    2.28
  -1  -7 -44  104.01    3.97
   1   7  44  102.58    4.25
   1   7  44   91.88    4.27
   1   7  44  103.25    4.36
   1  -7  44  105.15    4.46
   1   7  45    0.32    0.32
  -1  -7 -45    0.95    0.40
   1  -7  45   -0.30    0.44
   1   7  45    0.30    0.50
   1   7  45    0.48    0.48
  -1  -7 -46    1.17    0.36
   1   7  46    0.53    0.40
   1  -7  46    0.75    0.46
   1   7  46    0.81    0.56
   1   7  46    0.49    0.31
   1   7  47    7.31    1.07
   1   7  47    5.56    0.87
  -1  -7 -47    8.04    1.00
   1  -7  47    5.61    0.97
   1   7  47    6.79    0.98
   1   7  48   17.46    1.49
   1  -7  48   19.30    1.63
   1   7  48   16.74    1.46
   1   7  48   13.90    1.34
  -1  -7 -48   14.59    1.25
   1   7  49   48.25    2.25
   1   7  49   52.27    2.39
  -1  -7 -49   51.96    2.11
   1  -7  49   52.81    2.48
   1   7  49   49.31    2.33
   1   7  50   42.79    1.99
   1   7  50   46.20    2.04
   1  -7  50   45.84    2.20
   1   7  50   37.72    1.70
  -1  -7 -50   39.81    1.62
   1  -7  51   18.94    1.27
   1   7  51   18.73    1.19
   1  -7  52   13.48    0.99
  -1   9  50   53.14    1.99
  -1  -9  50   50.16    2.01
  -1   9  49   24.08    1.52
  -1   9  49   21.71    1.44
  -1  -9  49   23.89    1.54
  -1   9  48    0.59    0.31
  -1   9  48   -0.05    0.24
   1  -9 -48    0.20    0.25
  -1  -9  48    0.30    0.26
   1  -9 -47    1.22    0.31
  -1   9  47    0.61    0.36
  -1  -9  47    1.33    0.41
  -1   9  47    1.26    0.54
  -1   9  46   57.98    2.83
  -1   9  46   54.51    2.87
  -1   9  46   56.31    2.06
  -1  -9  46   58.81    2.95
   1  -9 -46   57.04    2.56
   1  -9 -45    9.13    1.09
  -1   9  45   12.97    1.41
  -1   9  45   11.42    1.02
  -1   9  45   10.78    1.42
  -1  -9  45   13.85    1.53
  -1   9  44    7.62    1.17
  -1   9  44    8.20    1.21
  -1  -9  44    8.30    1.25
  -1   9  44    7.83    0.93
   1  -9 -44    8.48    1.12
  -1   9  43    0.42    0.48
   1  -9 -43    0.35    0.27
  -1   9  43    0.88    0.37
  -1   9  43    0.18    0.42
  -1  -9  43    0.02    0.39
  -1   9  42   22.40    2.06
  -1   9  42   21.26    2.19
  -1   9  42   17.92    1.53
   1  -9 -42   22.02    1.86
  -1  -9  42   19.24    2.05
  -1  -9  41    0.26    0.58
  -1   9  41    0.10    0.49
  -1   9  41   -0.10    0.24
   1  -9 -41   -0.15    0.31
  -1   9  41   -0.12    0.45
  -1   9  40    0.22    0.40
  -1   9  40   -0.01    0.30
  -1  -9  40    0.56    0.62
   1  -9 -40    0.31    0.31
  -1   9  40   -0.17    0.39
  -1   9  39   34.62    2.79
  -1  -9  39   30.13    2.76
   1  -9 -39   35.05    2.55
  -1   9  39   30.23    2.23
  -1   9  39   34.26    2.93
  -1   9  38  103.94    5.20
   1  -9 -38  106.38    4.51
  -1   9  38  105.58    4.84
  -1  -9  38   97.00    5.04
  -1   9  38   94.99    3.99
  -1   9  37    4.68    0.94
  -1  -9  37    5.39    1.36
  -1   9  37    5.32    1.29
   1  -9 -37    5.36    1.04
  -1   9  37    6.81    1.30
  -1  -9  36    0.59    0.55
  -1   9  36    0.52    0.48
  -1   9  36   -0.23    0.57
   1  -9 -36    0.53    0.45
  -1   9  36    0.46    0.41
  -1   9  35   49.73    3.46
  -1  -9  35   47.67    3.66
  -1   9  35   54.53    3.94
  -1   9  35   48.00    3.02
   1  -9 -35   49.78    3.15
  -1   9  34    3.35    0.87
  -1   9  34    3.36    0.92
  -1   9  34    4.26    1.22
   1  -9 -34    4.83    1.07
  -1  -9  34    3.89    1.27
  -1   9  33  204.75    6.34
  -1   9  33  206.44    7.72
   1  -9 -33  206.38    6.50
  -1  -9  33  208.43    7.84
  -1   9  33  207.94    7.02
  -1  -9  32    0.08    0.68
  -1   9  32   -0.13    0.41
   1  -9 -32    0.61    0.44
  -1   9  32    0.57    0.75
  -1   9  32    0.00    0.50
  -1   9  31   15.60    1.78
   1  -9 -31   17.10    4.14
   1   9 -31   21.35    5.20
  -1  -9  31   15.04    2.12
  -1   9  31   17.74    2.08
   1  -9 -31   20.25    2.04
  -1   9  31   20.78    2.45
  -1  -9  31   16.15    4.82
  -1  -9  31   15.18    4.86
   1  -9 -30  153.40    5.58
  -1  -9  30  147.14   14.42
  -1  -9  30  147.53   14.23
   1   9 -30  133.18   12.97
  -1   9  30  155.06    6.63
   1  -9 -30  131.04   11.48
  -1   9  30  135.37    5.15
  -1  -9  30  136.32    6.29
  -1   9  30  142.71    5.81
  -1  -9  30  136.18    4.75
  -1  -9  29   40.96    3.42
  -1   9  29   45.13    3.57
  -1  -9  29   40.82    2.57
  -1  -9  29   45.25    7.93
   1  -9 -29   42.64    6.53
   1   9 -29   41.76    7.19
  -1  -9  29   39.63    3.06
   1  -9 -29   47.13    3.13
  -1  -9  29   50.86    8.40
  -1   9  29   45.34    3.25
  -1   9  29   41.67    2.86
   1  -9 -28   42.64    2.96
  -1  -9  28   50.29    8.39
  -1  -9  28   40.13    2.55
  -1   9  28   40.56    3.38
   1   9 -28   34.54    6.41
  -1   9  28   40.51    3.11
  -1   9  28   44.36    2.94
  -1  -9  28   42.79    3.19
  -1  -9  28   49.71    8.06
  -1  -9  28   42.04    3.54
   1  -9 -28   34.64    6.09
  -1   9  27  232.82    7.95
  -1   9  27  224.35    7.06
  -1  -9  27  214.30    5.83
   1   9 -27  185.04   14.89
  -1  -9  27  233.65   17.61
   1  -9 -27  197.56   14.07
  -1   9  27  223.16    6.57
  -1  -9  27  189.22    6.67
  -1  -9  27  208.07    7.70
   1  -9 -27  223.90    6.74
  -1  -9  27  230.06   17.02
   1   9 -26    1.90    1.10
  -1   9  26    0.82    0.57
   1  -9 -26    0.66    0.56
  -1  -9  26    1.44    0.59
  -1  -9  26    2.12    0.97
  -1   9  26    4.35    1.00
  -1  -9  26    1.06    0.74
   1  -9 -26    1.11    1.47
  -1   9  26    1.29    0.68
  -1  -9  26    2.56    1.89
  -1  -9  26    0.08    1.29
   1  -9 -25   10.39    3.28
  -1  -9  25   12.27    1.88
  -1  -9  25   16.39    4.57
  -1   9  25   12.76    1.87
   1   9 -25    8.96    3.39
  -1   9  25   13.22    1.62
  -1  -9  25   12.08    3.66
  -1  -9  25   10.78    1.56
   1  -9 -25   12.86    1.65
  -1   9  25   12.19    1.65
  -1  -9  24  307.36    9.04
  -1  -9  24  381.89   21.66
  -1   9  24  349.55    9.45
  -1   9  24  334.83   13.19
  -1   9  24  333.55    7.79
   1   9 -24  310.33   18.49
   1  -9 -24  356.16    8.27
   1  -9 -24  325.20   17.98
  -1  -9  24  378.45   20.41
   1   9 -23   51.49    7.40
  -1   9  23   64.00    5.68
   1  -9 -23   54.54    7.33
  -1  -9  23   71.75    5.96
  -1  -9  23   75.84    9.54
  -1  -9  23   66.08    8.36
  -1  -9  22  658.51   17.61
  -1   9  22  591.34   17.32
  -1  -9  22  642.34   25.38
   1   9 -22  517.19   22.90
  -1  -9  22  693.89   28.03
   1  -9 -22  547.56   22.60
  -1   9  21   52.81    5.14
   1   9 -21   60.18    7.78
  -1  -9  21   67.74    8.48
  -1  -9  21   59.22    5.17
  -1  -9  21   65.73    7.96
   1  -9 -21   60.59    7.41
   1   9 -20   23.72    4.81
  -1   9  20   24.90    3.54
  -1  -9  20   29.78    5.49
   1  -9 -20   27.55    4.97
  -1  -9  20   31.65    5.47
  -1  -9  20   29.63    3.61
  -1  -9  19   29.65    3.55
   1  -9 -19   24.40    4.56
  -1  -9  19   24.79    4.58
  -1   9  19   23.30    3.37
   1   9 -19   25.60    4.90
  -1  -9  19   33.46    5.75
  -1   9  18  499.21   15.51
  -1  -9  18  558.59   21.18
   1   9 -18  513.40   21.20
  -1  -9  18  533.47   14.56
   1  -9 -18  526.37   20.99
  -1  -9  18  571.53   22.99
  -1  -9  17   54.35    6.98
  -1  -9  17   44.59    5.86
   1  -9 -17   30.06    4.93
  -1  -9  17   46.83    4.25
  -1   9  17   41.71    4.49
   1   9 -17   25.05    4.84
   1   9 -16  209.61   13.07
  -1  -9  16  208.94   12.29
  -1  -9  16  208.17   13.16
  -1  -9  16  191.57    8.48
  -1   9  16  186.65    9.43
   1  -9 -16  203.37   12.50
  -1  -9  15  239.48   12.75
  -1  -9  15  219.47    8.81
  -1  -9  15  254.60   14.01
  -1   9  15  221.51   10.22
   1  -9 -15  212.65   12.59
   1   9 -15  222.39   13.18
   1  -9 -14   11.35    2.91
  -1  -9  14   13.08    3.02
  -1  -9  14   10.64    1.98
  -1   9  14   10.62    2.07
  -1  -9  14   15.99    3.59
   1   9 -14    9.13    2.97
  -1   9  14   10.58    2.33
  -1   9  13  454.23   14.49
  -1  -9  13  464.31   12.59
  -1   9  13  416.89   12.25
   1   9 -13  415.12   17.22
   1  -9 -13  391.74   16.36
  -1  -9  13  497.71   17.53
  -1  -9  13  537.47   19.00
  -1   9  12   13.30    2.22
  -1  -9  12   22.29    3.90
  -1   9  12   19.44    2.98
   1   9 -12   12.08    2.97
  -1  -9  12   17.74    2.47
   1  -9 -12   12.07    2.86
  -1  -9  12   20.16    3.53
  -1   9  11   20.14    2.59
   1   9 -11   14.72    3.18
  -1  -9  11   13.61    2.84
  -1  -9  11   14.11    2.94
  -1   9  11   11.75    2.40
   1  -9 -11   15.62    3.25
  -1  -9  11   10.37    1.90
   1  -9 -10   11.82    2.72
  -1  -9  10    3.41    1.14
  -1   9  10   13.81    2.10
  -1  -9  10    3.54    1.49
  -1   9  10    3.11    1.47
   1   9 -10   14.60    3.09
  -1  -9  10    5.29    1.83
  -1   9   9    0.35    0.56
  -1   9   9    0.48    0.47
  -1  -9   9    1.00    0.96
   1   9  -9    1.35    0.83
  -1  -9   9    1.04    0.70
   1  -9  -9    0.57    0.94
   1   9  -8   22.41    3.59
  -1   9   8   22.95    2.64
   1  -9  -8   15.99    3.01
  -1   9   8   22.52    3.26
  -1  -9   8   23.13    2.77
  -1  -9   8   26.20    3.70
  -1  -9   8   24.94    3.60
  -1  -9   7   24.10    2.89
  -1  -9   7   24.37    3.38
   1  -9  -7   33.35    4.11
   1   9  -7   37.13    4.54
  -1   9   7   26.56    3.51
  -1   9   7   37.46    3.38
   1   9  -6   32.43    4.16
  -1  -9   6   56.66    4.96
  -1   9   6   31.95    3.15
  -1  -9   6   52.65    4.17
  -1   9   6   52.07    4.85
  -1   9   5    3.32    1.28
  -1  -9   5    2.81    1.07
   1   9  -5    9.42    2.25
  -1   9   5    9.65    1.72
  -1  -9   5    1.83    0.80
  -1  -9   4   92.94    5.60
  -1   9   4  122.06    6.17
   1   9  -4  118.85    7.63
   1  -9  -4  108.64    7.15
  -1  -9   4  104.98    6.29
   1   9  -3  773.03   19.09
   1  -9  -3  837.47   19.49
  -1  -9   3  837.70   17.28
  -1  -9   3  772.86   16.27
  -1   9   3  780.07   15.86
  -1  -9   2  771.03   16.16
  -1  -9   2  716.87   15.82
  -1   9   2  789.70   16.10
   1  -9  -2  744.08   17.89
   1   9  -2  774.43   18.89
  -1  -9   1  686.72   14.87
   1  -9  -1  647.90   16.39
  -1   9   1  647.38   14.72
   1   9  -1  645.98   17.04
  -1  -9   1  628.25   15.03
   1  -9  -1  690.13   15.65
   1  -9   0   50.16    4.30
   1  -9   0   48.43    4.45
  -1   9   0   31.41    3.34
   1   9   0   31.81    3.82
  -1  -9   0   51.64    3.99
  -1  -9   0   46.21    4.16
  -1   9  -1  196.40    8.40
  -1  -9  -1  212.49    8.00
  -1  -9  -1  201.88    8.80
   1  -9   1  209.83    8.80
   1  -9   1  201.00    8.92
   1   9   1  204.05    9.37
  -1  -9  -2  150.64    7.82
   1   9   2  223.45    9.71
   1  -9   2  150.34    7.57
  -1   9  -2  224.67    9.16
   1  -9   2  152.99    7.70
  -1  -9  -2  161.08    6.79
  -1   9  -3    0.56    0.55
   1  -9   3    1.23    0.90
   1   9   3    2.93    1.21
  -1  -9  -3    1.25    0.62
   1  -9   3    1.91    0.95
  -1   9  -4    5.50    1.59
   1  -9   4   16.17    2.66
   1   9   4    7.19    1.83
   1  -9   4   16.35    2.56
   1  -9   5   28.70    3.55
   1  -9   5   26.12    3.17
  -1  -9  -5   35.01    3.61
   1   9   5   44.70    4.30
  -1   9  -5   44.28    4.34
   1  -9   6   77.83    5.40
   1   9   6   54.58    4.78
   1  -9   6   84.76    6.20
  -1   9  -6   58.36    5.18
  -1  -9  -6   49.58    4.50
   1  -9   6   83.74    6.39
   1  -9   7   41.25    4.43
   1  -9   7   40.40    4.59
   1  -9   7   38.44    4.53
  -1  -9  -7   42.45    4.28
  -1   9  -7   53.41    5.03
   1  -9   7   34.98    3.60
   1   9   7   50.54    4.58
   1  -9   8  432.71   15.26
  -1   9  -8  359.29   13.59
   1  -9   8  452.66   14.95
   1   9   8  345.39   11.82
  -1  -9  -8  314.59   12.00
   1  -9   8  428.65   12.52
   1  -9   8  433.69   15.10
   1   9   9    6.39    1.71
   1  -9   9    8.87    1.89
  -1   9  -9    4.70    1.87
   1  -9   9    9.37    2.32
   1  -9   9    8.32    2.19
   1  -9   9    7.16    2.10
  -1  -9  -9    4.72    1.84
   1  -9  10   23.25    3.84
  -1   9 -10   40.57    4.84
   1  -9  10   21.73    3.49
  -1  -9 -10   29.61    3.90
   1  -9  10   20.07    2.79
   1  -9  10   24.98    3.84
   1   9  10   38.67    4.05
   1   9  11  310.31   11.57
  -1  -9 -11  255.38   11.81
   1  -9  11  323.51   11.01
   1   9  11  269.51   10.75
   1  -9  11  351.67   14.36
  -1   9 -11  294.43   13.35
   1  -9  11  326.87   14.27
   1  -9  11  329.13   13.96
   1  -9  12    3.30    1.64
   1  -9  12    4.45    1.72
   1   9  12    4.79    1.57
   1  -9  12    3.79    1.22
   1  -9  12    3.04    1.46
   1   9  12    3.79    1.33
  -1  -9 -12    4.09    1.53
  -1   9 -12    4.09    1.83
   1  -9  13  207.79   11.59
   1   9  13  200.74    9.48
   1  -9  13  193.07    8.63
  -1  -9 -13  192.38   10.80
   1  -9  13  209.62   11.86
  -1   9 -13  213.90   11.90
   1   9  13  190.54    9.14
   1  -9  13  214.07   11.88
   1  -9  14    4.97    1.97
   1  -9  14    5.00    1.95
   1  -9  14    6.13    1.59
   1  -9  14    3.99    1.72
   1   9  14    1.53    0.97
  -1  -9 -14    4.42    1.85
  -1   9 -14    0.87    1.00
   1   9  14    4.29    1.40
  -1   9 -15  128.43    9.65
   1  -9  15  149.10   10.62
  -1  -9 -15  118.60    8.96
  -1   9 -15  130.69    6.10
   1   9  15  129.24    7.61
   1  -9  15  139.92   10.10
   1  -9  15  136.40    9.93
   1  -9  15  132.93    7.31
   1   9  15  117.86    7.48
  -1   9 -16   99.99    5.38
   1   9  16   88.84    6.30
   1  -9  16   92.74    6.17
   1   9  16   91.37    6.72
  -1   9 -16   94.81    8.60
   1  -9  16   94.51    8.55
  -1  -9 -16   94.74    8.07
   1  -9  16   97.36    8.90
   1  -9  16   99.97    8.69
   1  -9  17    1.87    1.25
   1  -9  17    1.72    1.46
  -1   9 -17    0.93    1.19
   1   9  17    0.32    0.68
  -1  -9 -17    1.31    1.13
   1  -9  17    3.88    1.31
   1   9  17    2.36    0.95
   1  -9  17    2.42    1.41
  -1   9 -18  291.86   15.66
   1   9  18  284.00   12.28
   1  -9  18  302.60   15.65
   1  -9  18  291.58   15.74
   1  -9  18  293.15   16.39
   1   9  18  262.71   10.83
   1  -9  18  278.24   11.08
  -1  -9 -18  272.11   14.23
   1   9  19   17.51    2.88
   1  -9  19   22.63    4.45
   1  -9  19   21.45    4.37
  -1   9 -19   27.70    5.00
   1  -9  19   18.46    2.95
  -1  -9 -19   23.88    4.29
   1  -9  19   19.67    4.38
  -1  -9 -20   31.20    4.98
  -1   9 -20   30.87    5.38
   1  -9  20   21.26    4.52
   1  -9  20   19.10    4.48
   1  -9  20   23.83    4.72
   1  -9  20   20.79    3.15
   1   9  20   17.39    2.81
   1   9  21    0.13    0.79
   1  -9  21    1.75    1.74
  -1   9 -21    0.93    0.92
  -1  -9 -21    0.69    0.99
   1  -9  21    3.22    2.10
   1  -9  21    1.69    0.78
   1  -9  21    1.92    1.12
   1  -9  22  534.59   24.53
   1   9  22  482.19   14.85
  -1  -9 -22  422.66   18.98
   1  -9  22  541.32   21.95
   1  -9  22  508.64   23.20
   1  -9  22  521.21   16.41
  -1   9 -22  416.83   20.53
   1  -9  23   28.63    5.73
   1   9  23   16.86    2.14
   1  -9  23   29.50    3.99
  -1  -9 -23   14.65    3.70
  -1   9 -23   13.95    3.96
   1  -9  23   26.96    5.68
  -1  -9 -23   14.87    1.73
   1  -9  23   27.20    5.09
  -1  -9 -24  193.64   13.14
  -1   9 -24  181.80   14.05
   1  -9  24  202.42   15.62
   1   9  24  203.76    7.16
   1  -9  24  174.40    6.68
   1  -9  24  208.01   13.83
  -1  -9 -24  212.69    6.33
   1  -9  24  205.56   10.76
   1  -9  24  170.69   14.17
   1  -9  25  158.82    6.50
   1  -9  25  153.90    4.77
  -1  -9 -25  144.27    5.26
  -1   9 -25  124.40   11.89
   1  -9  25  175.80   14.72
   1  -9  25  188.10   15.26
   1  -9  25  184.86   13.04
   1  -9  25  134.36    5.56
  -1  -9 -25  131.64   10.84
   1   9  25  153.19    6.30
   1  -9  26   21.31    2.48
   1  -9  26   18.77    4.31
   1  -9  26   19.06    5.19
   1  -9  26   18.95    2.01
  -1  -9 -26   31.22    5.33
   1   9  26   32.87    2.93
  -1  -9 -26   38.03    2.73
   1  -9  26   19.60    5.02
   1   9  26   18.96    1.83
  -1   9 -26   30.74    6.03
   1  -9  26   25.58    1.96
   1  -9  27  236.38    8.03
   1   9  27  234.57    6.53
   1  -9  27  244.40   18.23
  -1  -9 -27  223.35   14.23
  -1   9 -27  229.93   16.38
   1  -9  27  257.30   18.28
   1  -9  27  274.96   16.14
  -1  -9 -27  265.84    7.21
   1   9  27  256.28    8.27
   1  -9  27  239.35    6.13
  -1  -9 -28   37.87    5.88
   1  -9  28   54.97    7.22
  -1   9 -28   32.84    6.17
  -1  -9 -28   45.16    3.01
   1  -9  28   47.06    3.59
   1   9  28   45.56    3.54
   1   9  28   47.40    2.95
   1  -9  28   45.68    2.70
   1  -9  28   58.91    8.88
   1  -9  28   44.54    7.81
   1  -9  29   50.95    8.48
   1  -9  29   47.04    2.75
  -1  -9 -29   56.47    3.39
  -1   9 -29   45.72    7.45
   1  -9  29   50.02    7.02
   1  -9  29   46.47    3.59
   1   9  29   54.26    3.89
   1   9  29   46.84    2.98
   1  -9  29   54.24    8.58
  -1  -9 -29   46.17    6.50
  -1   9 -30  162.07   14.21
   1   9  30  182.43    5.84
  -1  -9 -30  188.96    6.13
  -1  -9 -30  163.76   12.21
   1  -9  30  185.12   16.49
   1  -9  30  189.88    7.32
   1  -9  30  199.45   16.49
   1  -9  30  181.65    5.49
   1   9  30  195.78    7.31
   1  -9  31   61.18    9.52
   1   9  31   65.12    4.27
   1  -9  31   57.31    8.95
   1  -9  31   54.15    3.97
   1   9  31   53.20    3.15
  -1   9 -31   62.75    8.81
   1  -9  31   59.78    3.18
  -1  -9 -31   59.87    7.28
  -1  -9 -31   64.21    3.60
   1   9  32    1.25    0.72
  -1  -9 -32    0.98    0.60
   1  -9  32    0.99    0.76
   1  -9  32    0.59    0.41
   1   9  32    0.69    0.49
   1   9  32    0.67    0.49
   1   9  33  291.15    7.87
   1   9  33  288.51    8.13
   1  -9  33  260.13    6.63
   1  -9  33  267.89    8.72
   1   9  33  260.37    6.95
  -1  -9 -33  268.91    7.29
   1   9  33  273.52    8.68
   1  -9  34    0.95    0.59
   1   9  34    1.14    0.60
   1   9  34    1.31    0.43
   1   9  34    0.88    0.54
  -1  -9 -34    1.04    0.51
   1   9  34    1.10    0.44
   1  -9  34    1.19    0.56
   1   9  35   11.67    1.48
   1   9  35   14.00    1.98
   1   9  35   13.39    1.80
   1   9  35   12.72    1.61
  -1  -9 -35   15.71    1.78
   1  -9  35   13.24    1.99
   1  -9  35   11.86    1.42
  -1  -9 -36    0.50    0.43
   1   9  36    0.81    0.60
   1   9  36   -0.15    0.37
   1   9  36    0.21    0.62
   1  -9  36    0.48    0.56
   1   9  36    0.62    0.41
   1  -9  37   31.11    2.91
  -1  -9 -37   28.30    2.30
   1   9  37   28.10    2.75
   1   9  37   32.25    2.70
   1   9  37   32.54    2.58
   1   9  37   30.09    2.27
   1   9  38   77.37    3.53
   1  -9  38   82.45    4.58
  -1  -9 -38   85.61    3.95
   1   9  38   82.19    4.59
   1   9  38   86.53    4.31
   1   9  38   89.60    4.21
   1   9  39   66.27    3.17
   1   9  39   62.79    3.95
   1  -9  39   68.41    4.08
  -1  -9 -39   61.88    3.34
   1   9  39   72.60    3.89
   1   9  39   69.92    3.69
   1   9  40   72.35    3.80
   1   9  40   63.19    3.84
   1   9  40   63.85    3.00
   1  -9  40   68.58    3.99
   1   9  40   68.38    3.54
  -1  -9 -40   64.31    3.31
   1   9  41    3.08    0.90
   1   9  41    2.00    0.67
   1  -9  41    1.84    0.68
   1   9  41    2.02    0.71
  -1  -9 -41    1.89    0.63
   1   9  41    1.78    0.57
   1   9  42    7.30    0.91
  -1  -9 -42    6.21    1.02
   1   9  42    7.10    1.12
   1   9  42    8.02    1.28
   1   9  42    6.48    1.20
   1  -9  42    7.58    1.29
  -1  -9 -43    2.34    0.64
   1   9  43    2.34    0.77
   1  -9  43    3.48    0.90
   1   9  43    2.95    0.71
   1   9  43    3.45    0.91
   1   9  43    2.59    0.49
   1   9  44   72.39    3.13
   1   9  44   78.53    3.53
   1  -9  44   77.36    3.68
  -1  -9 -44   72.14    3.13
   1   9  44   69.66    3.49
   1   9  45    8.77    1.18
  -1  -9 -45    8.12    1.03
   1   9  45    8.60    1.05
   1  -9  45    8.40    1.22
   1   9  45    7.51    1.11
   1   9  46   58.40    2.76
   1   9  46   53.55    2.76
  -1  -9 -46   58.55    2.55
   1  -9  46   56.44    2.83
   1  -9  47    3.97    0.73
  -1  -9 -47    4.13    0.64
   1   9  47    4.38    0.75
   1   9  47    3.21    0.64
   1   9  48    0.33    0.23
   1  -9  48    0.62    0.39
  -1  -9 -48    0.39    0.22
   1   9  48    0.02    0.24
   1   9  49   26.66    1.54
  -1  -9 -49   25.16    1.31
   1   9  49   23.59    1.36
   1  -9  49   25.49    1.56
   1   9  50   47.09    1.79
   1  -9  50   44.86    1.87
  -1  11  48    1.20    0.30
  -1 -11  48    1.25    0.31
  -1  11  48    0.68    0.25
   1 -11 -47    0.43    0.26
  -1  11  47    0.13    0.21
  -1 -11  47    0.83    0.29
  -1  11  47    0.61    0.30
  -1 -11  46   33.19    1.94
   1 -11 -46   34.64    1.73
  -1  11  46   33.05    1.97
  -1  11  46   35.77    1.95
  -1  11  46   32.36    1.31
  -1  11  45   10.59    1.13
  -1  11  45   10.87    0.88
   1 -11 -45   10.03    1.03
  -1  11  45   10.22    1.18
  -1 -11  45   10.58    1.18
   1 -11 -44    0.61    0.35
  -1  11  44    0.32    0.28
  -1  11  44    0.26    0.21
  -1 -11  44    0.36    0.44
  -1  11  44    0.64    0.34
   1 -11 -43   16.74    1.48
  -1  11  43   21.28    1.79
  -1 -11  43   19.88    1.82
  -1  11  43   17.66    1.72
  -1  11  43   20.91    1.44
  -1 -11  42   22.74    2.07
  -1  11  42   20.11    1.94
  -1  11  42   22.88    1.60
   1 -11 -42   17.42    1.57
  -1  11  42   24.23    1.98
   1 -11 -41    9.08    1.14
  -1  11  41   12.13    1.24
  -1 -11  41   11.33    1.50
  -1  11  41   10.94    1.48
  -1  11  41   12.09    1.47
  -1 -11  40    0.95    0.51
  -1  11  40   -0.13    0.36
   1 -11 -40    0.71    0.48
  -1  11  40    0.18    0.29
  -1  11  40    0.98    0.55
  -1 -11  39    1.56    0.60
  -1  11  39    1.76    0.67
   1 -11 -39    0.87    0.39
  -1  11  39    2.01    0.61
  -1  11  39    1.34    0.72
  -1  11  38   20.30    2.05
  -1  11  38   21.04    2.29
  -1  11  38   20.28    1.79
  -1 -11  38   18.02    2.11
   1 -11 -38   20.77    1.87
  -1  11  37   37.61    3.06
  -1  11  37   37.24    2.78
   1 -11 -37   32.30    2.42
  -1  11  37   36.80    2.47
  -1 -11  37   37.01    3.06
  -1  11  36    0.59    0.41
  -1  11  36    0.15    0.32
  -1 -11  36    1.30    0.67
  -1  11  36    0.39    0.40
   1 -11 -36    0.97    0.39
  -1  11  35  101.27    4.28
  -1  11  35   99.03    4.67
  -1  11  35   92.83    4.97
  -1 -11  35   93.84    5.09
   1 -11 -35   82.81    4.00
   1 -11 -34   38.44    2.77
  -1  11  34   42.53    3.15
  -1  11  34   41.24    3.35
  -1  11  34   42.99    2.85
  -1 -11  34   43.35    3.51
  -1  11  33   34.82    2.81
  -1  11  33   31.72    2.49
  -1  11  33   36.20    3.17
  -1 -11  33   33.31    3.08
  -1 -11  33   29.06    2.50
   1 -11 -33   36.20    2.75
  -1  11  32    0.29    0.28
  -1  11  32   -0.60    0.63
  -1 -11  32   -0.43    0.73
   1 -11 -32    0.52    0.44
  -1 -11  32    0.97    0.57
  -1  11  32    0.70    0.55
  -1  11  31    7.23    1.53
  -1 -11  31    5.57    1.14
  -1  11  31    5.75    1.15
  -1 -11  31    5.88    1.42
   1 -11 -31    6.14    1.24
  -1  11  31    6.08    1.15
  -1 -11  30  151.27    6.78
   1 -11 -30  163.95    5.91
  -1  11  30  147.22    5.48
  -1  11  30  168.55    6.95
  -1 -11  30  132.34    5.77
  -1  11  30  153.60    6.05
  -1 -11  29  208.45    8.03
  -1  11  29  204.95    7.69
  -1  11  29  222.29    6.74
  -1  11  29  216.94    7.15
   1 -11 -29  176.92    6.17
  -1 -11  29  187.03    6.96
  -1  11  28    1.23    0.70
  -1 -11  28    0.74    0.62
   1 -11 -28    2.42    2.07
  -1  11  28    2.37    0.94
   1 -11 -28    1.16    0.71
   1  11 -28    2.52    2.32
  -1 -11  28    1.17    1.65
  -1 -11  28    0.93    0.46
  -1  11  28    1.77    0.64
  -1  11  27  114.33    5.74
  -1 -11  27  109.45    5.49
  -1 -11  27  117.36   12.83
  -1 -11  27  143.62   14.47
  -1  11  27  121.49    4.99
  -1 -11  27  111.45    5.84
   1 -11 -27   97.02   10.85
   1 -11 -27  109.85    4.88
   1  11 -27   85.51   10.60
  -1  11  27  121.39    5.28
  -1 -11  26   23.66    5.57
  -1 -11  26   20.00    2.42
   1  11 -26   14.93    4.44
  -1  11  26   24.15    2.36
  -1  11  26   26.36    2.36
  -1 -11  26   21.35    2.57
  -1  11  26   20.58    2.47
  -1 -11  26   30.82    6.61
   1 -11 -26   17.84    2.01
   1 -11 -26   14.58    4.24
   1 -11 -25   21.15    2.17
  -1  11  25   22.57    2.58
  -1  11  25   18.15    1.95
  -1 -11  25   18.68    2.39
   1  11 -25   22.77    5.55
   1 -11 -25   17.15    4.53
  -1 -11  25   16.48    4.72
  -1  11  25   17.90    2.08
  -1 -11  25   18.72    4.81
  -1 -11  25   16.82    2.15
   1 -11 -24    5.85    1.16
  -1  11  24    4.40    1.08
  -1 -11  24    5.18    1.13
  -1  11  24    4.80    0.95
  -1 -11  24    4.79    1.49
  -1  11  24    7.16    2.25
  -1 -11  24    6.81    3.26
   1 -11 -24    3.95    2.11
   1  11 -24    2.45    1.58
  -1 -11  24    5.23    1.26
  -1  11  24    5.44    1.29
  -1 -11  24    4.82    1.29
  -1 -11  24    7.59    2.97
  -1  11  23  220.20    7.76
  -1 -11  23  196.75    7.46
  -1 -11  23  239.43   17.15
  -1 -11  23  253.11   18.58
  -1 -11  23  197.89    7.45
  -1  11  23  204.20    6.74
   1 -11 -23  187.86   14.76
  -1 -11  23  234.50   11.40
   1 -11 -23  190.63    6.42
  -1 -11  23  188.97    7.02
   1  11 -23  184.38   15.12
  -1  11  23  215.57    6.61
  -1  11  23  222.56   11.71
  -1 -11  22  143.97   13.07
  -1  11  22  151.83    6.38
  -1 -11  22  125.85    5.95
   1 -11 -22  150.47    5.70
   1  11 -22  137.08   12.71
  -1 -11  22  132.91    5.99
  -1 -11  22  143.77    8.74
  -1 -11  22  121.71    5.70
  -1  11  22  129.58    5.29
  -1  11  22  128.74    5.05
  -1  11  22  131.66    8.99
   1 -11 -22  127.34   11.97
  -1 -11  22  154.80   14.34
  -1 -11  21   22.41    2.47
  -1  11  21   25.39    4.06
  -1 -11  21   21.49    2.43
  -1  11  21   22.49    2.18
   1 -11 -21   21.09    2.17
  -1 -11  21   25.68    5.40
  -1 -11  21   24.36    2.63
  -1 -11  21   30.72    6.18
  -1 -11  21   26.80    3.80
   1 -11 -21   19.78    4.83
  -1  11  21   23.07    2.49
   1  11 -21   18.62    4.57
  -1 -11  20   28.43    2.84
   1  11 -20   25.38    5.27
   1 -11 -20   28.95    2.50
  -1  11  20   31.37    2.87
  -1 -11  20   31.69    6.28
  -1 -11  20   26.59    2.63
  -1 -11  20   28.31    2.83
  -1 -11  20   29.49    5.70
  -1  11  20   28.90    4.24
   1 -11 -20   22.23    4.92
  -1 -11  20   28.82    3.79
  -1 -11  19   50.87    3.76
   1  11 -19   50.18    7.49
   1 -11 -19   44.82    6.88
  -1  11  19   53.34    5.73
  -1 -11  19   63.38    8.59
  -1 -11  19   55.20    5.19
  -1 -11  19   56.34    7.66
  -1 -11  19   50.25    3.67
  -1  11  19   54.57    3.80
   1 -11 -19   50.25    3.31
   1  11 -18  306.06   17.69
  -1 -11  18  365.31   19.98
  -1 -11  18  339.62   12.63
  -1 -11  18  344.87   18.46
  -1  11  18  317.08   13.93
   1 -11 -18  288.87   17.19
  -1 -11  18  302.32    8.94
  -1  11  17  145.48    9.42
  -1 -11  17  160.89   12.32
   1  11 -17  129.39   11.45
  -1 -11  17  147.59    8.22
  -1 -11  17  157.85   12.80
   1 -11 -17  119.13   10.82
  -1 -11  16    2.39    1.12
   1 -11 -16    1.65    1.42
  -1 -11  16    4.47    2.37
  -1  11  16    2.71    1.47
   1  11 -16    1.77    1.22
  -1 -11  16    2.40    1.66
   1 -11 -15    6.08    2.41
   1  11 -15    5.39    2.10
  -1  11  15    6.07    1.93
  -1 -11  15    9.58    2.98
  -1 -11  15    7.30    1.78
  -1 -11  15    7.39    2.82
   1 -11 -14   15.96    3.79
  -1 -11  14   17.51    3.89
  -1  11  14   15.94    3.17
  -1 -11  14   17.45    2.79
   1  11 -14   15.20    3.67
  -1 -11  14   17.57    3.87
  -1  11  13    8.38    2.29
   1  11 -13    5.56    2.06
   1 -11 -13    6.43    2.39
  -1 -11  13   10.59    2.16
  -1 -11  13    9.94    2.95
   1 -11 -12    2.26    1.33
  -1 -11  12    2.47    1.06
  -1 -11  12    2.76    1.42
  -1  11  12    3.09    1.55
   1  11 -12    2.83    1.56
   1 -11 -11   37.37    5.40
  -1  11  11   57.91    5.93
  -1 -11  11   60.71    6.61
  -1 -11  11   50.37    4.60
   1  11 -11   42.82    5.93
  -1  11  10   62.84    6.17
  -1 -11  10   59.74    5.07
   1  11 -10   55.53    6.57
  -1 -11  10   62.40    6.47
  -1 -11   9    7.05    1.70
   1  11  -9    4.32    1.71
  -1 -11   9    6.22    2.03
  -1  11   9    7.34    2.09
  -1  11   8    6.37    2.14
  -1 -11   8    5.55    1.76
   1 -11  -8    7.31    2.39
   1  11  -8    3.57    1.71
  -1 -11   8    4.77    1.55
  -1  11   7   93.13    7.46
   1 -11  -7  100.91    8.34
   1  11  -7   98.22    8.26
  -1 -11   7   87.76    6.22
  -1 -11   7  103.35    7.66
  -1 -11   6  131.83    7.62
  -1  11   6  125.98    8.66
   1 -11  -6  137.13    9.54
  -1 -11   6  134.97    8.51
  -1 -11   5    1.06    0.64
  -1 -11   5   -0.09    0.54
   1  11  -5    0.96    1.28
  -1  11   5    1.01    1.11
   1 -11  -5    0.83    0.53
   1  11  -4   12.04    2.81
  -1 -11   4   14.68    2.62
   1 -11  -4   13.29    2.81
  -1 -11   4   12.73    2.43
  -1  11   4   15.41    3.16
  -1 -11   3  815.47   19.42
  -1  11   3  776.78   21.34
   1 -11  -3  819.52   21.85
  -1 -11   3  771.81   18.87
   1 -11  -2 1246.01   26.53
  -1  11   2 1249.79   23.01
  -1 -11   2 1210.64   23.80
   1  11  -2 1235.83   27.16
  -1 -11   2 1293.54   23.87
  -1  11   2 1202.79   26.49
  -1 -11   1  338.88   12.75
  -1  11   1  237.33   10.30
   1 -11  -1  348.25   13.87
   1  11  -1  226.19   11.55
  -1 -11   1  347.78   12.12
  -1  11   0   23.16    3.28
   1  11   0   20.21    3.45
  -1 -11   0   24.50    3.50
   1 -11   0   28.16    3.91
  -1 -11   0   28.87    3.46
  -1  11  -1    7.76    1.85
   1  11   1    6.26    2.01
   1 -11   1    2.14    1.00
  -1 -11  -1    2.86    1.40
   1  11   2  853.91   21.68
  -1  11  -2  843.96   20.22
   1 -11   2  847.46   20.49
   1 -11   2  828.42   20.64
  -1 -11  -2  826.94   20.82
   1  11   3  791.61   20.66
   1 -11   3  916.80   21.48
  -1 -11  -3  896.89   22.07
   1 -11   3  887.75   21.18
  -1  11  -3  790.77   19.98
  -1 -11  -4   44.86    5.08
   1 -11   4   48.36    5.07
   1 -11   4   44.18    4.74
  -1  11  -4   38.34    4.49
   1  11   4   38.34    4.60
   1 -11   5   90.28    6.68
  -1  11  -5   77.68    6.55
   1 -11   5   93.59    7.17
  -1 -11  -5   90.52    7.28
   1  11   5   83.26    6.61
   1 -11   6   42.84    5.05
  -1  11  -6   39.02    4.76
  -1 -11  -6   45.60    5.38
   1 -11   6   43.39    4.63
   1  11   6   37.03    4.41
   1 -11   7    4.81    1.77
   1 -11   7    4.15    1.52
   1  11   7    1.89    0.88
  -1  11  -7    2.20    1.32
   1 -11   8   10.48    2.63
   1  11   8   16.93    2.90
  -1  11  -8   16.77    3.30
   1 -11   8   10.16    2.26
   1 -11   9    1.39    0.78
   1 -11   9    1.45    1.13
  -1 -11  -9    2.44    1.29
   1  11   9    2.15    1.27
   1  11   9    2.18    1.14
  -1  11  -9    1.47    1.18
   1  11  10   31.01    4.26
  -1  11 -10   30.36    4.66
  -1 -11 -10   24.32    3.97
   1  11  10   29.16    3.90
   1 -11  10   28.30    3.74
   1 -11  10   27.91    4.44
   1  11  11   13.09    2.75
  -1 -11 -11   12.11    2.90
   1  11  11   13.12    2.72
  -1  11 -11   12.55    2.99
   1 -11  11   16.35    3.46
   1 -11  11   14.29    2.55
   1 -11  12   10.13    2.24
   1 -11  12   10.23    2.78
   1 -11  12   12.12    3.19
   1  11  12   11.07    2.66
   1  11  12    6.20    1.80
  -1 -11 -12    5.95    2.13
  -1  11 -12    6.17    2.11
   1  11  13   73.86    6.59
  -1  11 -13   70.31    7.34
   1 -11  13   71.69    5.88
  -1 -11 -13   61.23    6.79
   1 -11  13   72.22    7.69
   1  11  13   64.33    5.90
   1 -11  13   75.38    7.96
  -1  11 -14   70.50    7.67
   1 -11  14   85.88    8.53
   1 -11  14   86.52    8.66
   1  11  14   84.53    7.02
  -1 -11 -14   68.27    7.31
   1 -11  14   77.98    6.22
   1  11  14   75.76    6.40
   1 -11  15   88.00    8.94
   1 -11  15   84.52    6.45
  -1  11 -15   56.57    7.04
   1  11  15   82.46    6.91
   1  11  15   54.68    5.56
   1 -11  15   87.08    8.87
  -1 -11 -15   51.45    6.52
   1 -11  16    6.21    2.65
   1 -11  16    4.91    1.66
   1 -11  16    6.33    2.68
  -1 -11 -16    2.75    1.51
  -1  11 -16    2.94    1.66
   1  11  16    5.37    1.77
   1 -11  17  253.10   15.76
   1 -11  17  232.12   10.81
   1 -11  17  243.07   15.65
   1  11  17  222.81   11.34
  -1 -11 -17  176.35   12.64
  -1  11 -17  194.70   13.66
   1 -11  18  434.86   21.54
   1 -11  18  419.00   10.94
  -1 -11 -18  405.04   19.33
   1  11  18  462.85   10.70
   1 -11  18  388.03   10.07
   1 -11  18  444.42   21.44
   1  11  18  398.63   15.13
  -1  11 -18  432.71   20.66
   1 -11  18  410.97   14.55
  -1  11 -19   22.16    4.97
  -1 -11 -19   24.54    2.29
  -1 -11 -19   20.34    4.45
   1  11  19   30.24    4.19
   1 -11  19   32.97    4.24
   1 -11  19   25.18    2.67
   1  11  19   27.12    2.67
   1 -11  19   31.07    5.77
   1 -11  19   26.01    2.67
   1 -11  19   31.78    5.98
  -1  11 -20   -0.35    0.95
   1  11  20    2.78    1.22
   1 -11  20    5.55    2.68
   1 -11  20    3.42    1.07
  -1 -11 -20    1.01    0.59
   1  11  20    1.71    0.76
   1 -11  20    2.40    0.85
   1 -11  20    4.44    1.54
  -1 -11 -20    0.08    1.40
   1 -11  20    3.37    2.16
  -1  11 -21    0.64    0.77
   1 -11  21    2.29    2.03
   1  11  21    1.32    0.83
  -1 -11 -21    1.91    0.75
   1 -11  21    0.85    0.62
  -1 -11 -21   -0.43    1.19
   1 -11  21    1.77    1.23
   1  11  21    1.33    1.20
   1 -11  21    0.07    1.37
   1 -11  21    1.30    0.36
   1 -11  22   85.94   10.61
   1 -11  22   74.99    4.56
   1 -11  22   83.22   10.13
   1 -11  22   74.55    4.43
   1 -11  22   84.41    7.02
  -1 -11 -22  100.57    4.55
   1  11  22   93.95    5.04
   1 -11  22   78.09    4.59
  -1 -11 -22   79.13    9.20
  -1  11 -22   90.96   10.21
   1 -11  23  259.17    8.22
   1 -11  23  344.77   20.99
  -1  11 -23  229.29   16.53
   1 -11  23  268.41    8.61
  -1 -11 -23  233.06   15.80
   1 -11  23  343.11   14.39
   1 -11  23  333.66   21.20
   1 -11  23  273.61    8.64
  -1 -11 -23  268.80    7.43
   1  11  23  286.42    8.88
  -1 -11 -24    2.94    2.14
  -1  11 -24    0.04    1.11
   1  11  24    1.93    0.87
  -1 -11 -24    1.20    0.37
   1 -11  24    1.52    0.73
   1 -11  24    0.94    0.98
   1 -11  24    3.08    1.23
   1 -11  24    2.32    0.92
   1 -11  24    1.39    1.72
   1 -11  24    1.13    0.70
  -1  11 -25   29.73    6.11
   1 -11  25   28.28    6.31
   1 -11  25   35.18    4.74
   1 -11  25   32.41    6.69
   1 -11  25   28.05    2.80
   1  11  25   33.40    3.08
   1 -11  25   28.58    2.89
  -1 -11 -25   29.73    5.71
  -1 -11 -25   36.60    2.78
   1 -11  25   32.59    2.27
   1 -11  26    7.88    3.25
  -1 -11 -26   10.12    1.50
   1  11  26    9.01    1.63
   1  11  26    4.34    1.03
  -1  11 -26    7.30    3.35
   1 -11  26    6.52    1.45
   1 -11  26    5.48    2.65
   1 -11  26    7.54    1.08
  -1 -11 -26    4.90    2.30
   1 -11  26    5.78    1.25
   1 -11  27   67.87   10.16
  -1 -11 -27   50.44    7.48
   1  11  27   67.06    4.42
  -1 -11 -27   68.95    3.79
   1 -11  27   66.50    3.25
   1 -11  27   67.01    9.94
   1 -11  27   63.71    4.37
   1  11  27   68.32    3.70
   1 -11  27   57.74    3.91
  -1  11 -27   49.21    8.05
   1  11  28    7.15    1.20
   1 -11  28    5.58    1.38
   1 -11  28    5.15    1.18
  -1 -11 -28    4.52    0.97
   1  11  28    6.04    1.39
   1 -11  28    6.37    1.01
   1 -11  29   42.84    2.66
   1 -11  29   42.44    3.57
  -1 -11 -29   36.41    2.74
   1 -11  29   39.26    3.15
   1  11  29   45.38    3.58
   1  11  29   48.46    3.34
   1  11  29   47.90    3.08
   1 -11  30   41.45    3.50
  -1 -11 -30   59.31    3.48
   1  11  30   56.19    4.01
   1 -11  30   39.16    3.08
   1  11  30   39.97    2.80
   1 -11  30   46.21    2.72
   1  11  30   45.81    3.21
   1 -11  31    0.91    0.45
  -1 -11 -31    0.57    0.43
   1  11  31    0.07    0.39
   1 -11  31    0.66    0.70
   1  11  31    0.87    0.59
   1  11  31    0.42    0.40
  -1 -11 -32    0.31    0.53
   1  11  32    0.11    0.48
   1  11  32    1.06    0.61
   1 -11  32    0.04    0.41
   1  11  32    0.55    0.59
   1 -11  32    0.49    0.36
  -1 -11 -33   96.55    4.31
   1  11  33  106.23    5.43
   1  11  33  103.02    4.39
   1 -11  33   99.17    5.29
   1 -11  33   97.24    3.89
   1  11  33  108.61    4.93
  -1 -11 -34   12.17    1.57
   1 -11  34   12.00    1.87
   1  11  34   13.12    1.70
   1  11  34   13.45    1.60
   1  11  34   14.03    1.93
   1  11  35   23.27    2.04
   1  11  35   25.06    2.54
  -1 -11 -35   23.02    2.07
   1  11  35   25.16    2.36
   1 -11  35   24.26    2.55
   1  11  36   28.61    2.18
   1  11  36   28.65    2.45
   1 -11  36   28.28    2.77
   1  11  36   23.89    2.53
  -1 -11 -36   22.95    2.07
   1  11  37    0.34    0.45
   1  11  37    0.70    0.46
   1 -11  37    0.90    0.58
  -1 -11 -37    0.46    0.43
   1  11  37    1.06    0.68
   1  11  38    4.78    1.11
   1  11  38    2.80    0.88
   1  11  38    1.07    0.44
   1 -11  38    1.47    0.59
  -1 -11 -38    3.59    0.77
   1 -11  39   10.23    1.56
   1  11  39    9.92    1.48
  -1 -11 -39    9.52    1.25
   1  11  39   11.21    1.48
   1  11  39    9.97    1.19
   1 -11  40    1.15    0.57
  -1 -11 -40    0.26    0.31
   1  11  40    1.50    0.65
   1  11  40    0.97    0.37
   1  11  40    1.08    0.44
   1  11  41    1.46    0.75
   1  11  41    1.48    0.55
  -1 -11 -41    2.18    0.63
   1 -11  41    1.75    0.64
   1  11  41    1.30    0.43
   1  11  42    2.67    0.66
  -1 -11 -42    3.18    0.64
   1  11  42    2.21    0.49
   1  11  42    2.52    0.76
   1 -11  42    3.23    0.80
   1 -11  43   15.68    1.61
  -1 -11 -43   12.28    1.20
   1  11  43   13.90    1.10
   1  11  43   11.96    1.40
   1  11  43   15.80    1.48
   1  11  44    2.06    0.42
   1  11  44    2.23    0.60
   1  11  44    1.31    0.47
   1 -11  44    2.48    0.71
  -1 -11 -44    1.61    0.45
   1 -11  45   19.90    1.57
  -1 -11 -45   16.94    1.29
   1  11  45   19.79    1.53
   1  11  45   18.39    1.54
  -1 -11 -46   39.96    1.84
   1  11  46   42.34    2.09
   1 -11  46   41.06    2.06
   1  11  46   41.87    2.12
   1  11  47    0.12    0.20
  -1 -11 -47    0.06    0.14
   1  11  48    0.58    0.21
  -1  13  45   41.74    1.89
  -1  13  44   39.23    1.79
   1 -13 -44   32.11    1.56
  -1 -13  44   36.10    1.74
  -1  13  44   37.44    1.98
  -1  13  44   38.74    1.44
  -1  13  43    4.75    0.76
  -1  13  43    5.40    0.78
  -1 -13  43    5.09    0.79
   1 -13 -43    4.27    0.65
  -1  13  43    5.11    0.62
  -1  13  42    6.62    0.75
  -1  13  42    5.43    0.91
  -1  13  42    6.46    0.91
   1 -13 -42    4.99    0.73
  -1 -13  42    5.41    0.83
  -1 -13  41    0.64    0.43
  -1  13  41    0.99    0.46
  -1  13  41    0.56    0.32
  -1  13  41   -0.01    0.26
   1 -13 -41    0.22    0.20
  -1  13  40   12.43    1.31
  -1  13  40   12.04    1.16
   1 -13 -40   10.71    1.16
  -1 -13  40   12.59    1.44
  -1  13  40   11.22    1.42
  -1 -13  39    5.53    1.02
  -1  13  39    4.70    0.75
  -1  13  39    5.02    0.90
  -1  13  39    6.51    1.09
   1 -13 -39    5.15    0.85
  -1  13  38   60.49    2.80
  -1 -13  38   56.51    3.25
  -1  13  38   56.83    3.33
  -1  13  38   57.12    3.00
   1 -13 -38   47.90    2.62
   1 -13 -37    0.15    0.34
  -1  13  37    2.14    0.60
  -1  13  37    1.79    0.73
  -1 -13  37    1.53    0.66
  -1  13  37    1.40    0.70
  -1  13  36   18.20    2.00
  -1 -13  36   15.85    1.90
  -1  13  36   18.44    1.66
  -1  13  36   18.13    1.79
   1 -13 -36   17.34    1.69
   1 -13 -35   34.04    2.42
  -1  13  35   39.13    2.51
  -1  13  35   41.87    3.13
  -1  13  35   40.27    2.74
  -1 -13  35   36.89    2.42
  -1 -13  35   37.54    2.96
  -1 -13  34    6.54    1.09
  -1  13  34    8.81    1.26
  -1  13  34    9.16    1.51
   1 -13 -34    5.64    1.03
  -1 -13  34    8.01    1.46
  -1  13  34    9.05    1.37
  -1 -13  33   12.38    1.80
  -1  13  33   12.10    1.82
  -1 -13  33   11.98    1.55
  -1  13  33   13.94    1.56
  -1  13  33   12.92    1.61
   1 -13 -33   11.08    1.46
  -1 -13  32    5.55    1.32
  -1  13  32    6.21    1.19
  -1  13  32    7.11    1.38
   1 -13 -32    6.41    1.17
  -1 -13  32    4.60    0.95
  -1  13  32    6.37    1.11
  -1  13  31   72.60    4.46
   1 -13 -31   61.03    3.51
  -1  13  31   69.29    3.83
  -1 -13  31   62.88    3.85
  -1 -13  31   65.45    4.24
  -1  13  31   74.82    3.82
  -1  13  30   26.34    2.38
   1 -13 -30   32.41    2.62
  -1 -13  30   24.21    2.48
  -1  13  30   24.26    2.19
  -1  13  30   32.78    3.05
  -1 -13  30   22.57    2.58
  -1 -13  29   31.17    2.97
   1 -13 -29   30.95    2.59
  -1  13  29   36.64    3.21
  -1  13  29   35.66    2.68
  -1 -13  29   35.79    3.07
  -1  13  29   36.58    2.82
  -1  13  28   78.07    4.70
  -1  13  28   78.34    4.01
   1 -13 -28   70.29    3.91
  -1 -13  28   67.08    4.44
  -1  13  28   77.28    4.13
  -1 -13  28   70.22    4.42
  -1 -13  27   54.64    3.57
  -1  13  27   61.94    3.73
  -1  13  27   69.44    3.82
   1 -13 -27   52.89    3.42
  -1 -13  27   55.71    4.07
  -1  13  27   61.93    4.22
  -1 -13  27   61.05    4.20
  -1  13  26    8.15    1.55
  -1 -13  26    6.62    1.28
   1 -13 -26    6.56    1.23
  -1  13  26    5.54    1.09
  -1  13  26    5.98    1.21
  -1 -13  26    6.44    1.46
  -1 -13  26    5.12    1.19
  -1 -13  25   36.10    3.24
  -1 -13  25   32.18    2.91
  -1  13  25   42.86    3.09
  -1  13  25   41.07    2.97
  -1 -13  25   38.88    3.46
   1 -13 -25   31.97    2.72
  -1  13  25   37.11    3.30
  -1 -13  24   71.51    4.70
   1 -13 -24   80.39    4.33
  -1 -13  24   70.09    4.47
  -1  13  24   75.37    4.04
  -1 -13  24   72.60    4.51
  -1  13  24   80.15    4.19
  -1  13  24   83.84    4.92
  -1  13  23    3.38    0.94
  -1 -13  23    3.88    1.17
  -1  13  23    4.06    1.06
   1 -13 -23    5.55    1.23
  -1  13  23    4.79    1.22
  -1 -13  23    4.81    1.25
  -1 -13  23    3.85    1.18
  -1  13  22   56.46    3.47
  -1  13  22   54.19    6.23
   1 -13 -22   52.55    3.53
  -1 -13  22   51.00    3.94
  -1  13  22   60.40    4.20
  -1 -13  22   66.19    9.98
   1  13 -22   52.55    8.33
   1 -13 -22   41.07    7.15
  -1 -13  22   52.20    4.07
  -1  13  22   54.69    3.41
  -1 -13  22   53.06    5.74
  -1 -13  21    1.47    0.76
   1 -13 -21    2.28    0.78
  -1  13  21    2.28    0.76
  -1 -13  21    1.15    0.67
  -1  13  21    1.38    0.57
  -1 -13  21    4.63    1.56
  -1 -13  21    0.73    0.72
  -1  13  21    1.45    0.72
   1  13 -21    1.51    2.05
  -1 -13  20   31.44    6.44
  -1  13  20   37.28    3.28
   1 -13 -20   33.00    2.88
   1  13 -20   28.98    6.16
  -1 -13  20   33.17    3.26
  -1 -13  20   31.85    4.44
  -1  13  20   32.58    4.89
  -1 -13  20   30.22    3.15
  -1 -13  19   11.92    2.00
   1  13 -19    9.74    3.41
  -1  13  19   11.64    1.93
  -1 -13  19   13.53    2.78
  -1  13  19   16.91    3.60
  -1 -13  19   10.28    1.87
  -1 -13  19   15.93    4.37
   1 -13 -19   11.64    1.80
  -1 -13  18  430.59   22.86
   1 -13 -18  390.46    9.78
   1  13 -18  348.14   20.27
  -1  13  18  386.89   16.87
  -1 -13  18  400.69   14.88
  -1 -13  18  372.71   10.79
  -1  13  18  422.77   10.74
  -1 -13  18  390.38   11.44
  -1 -13  17   87.01    5.22
  -1 -13  17  103.22   10.97
  -1 -13  17   90.72    5.61
   1 -13 -17   84.20    4.59
  -1 -13  17   87.87    6.93
  -1  13  17   90.84    8.12
   1  13 -17   73.80    9.25
  -1  13  17   95.01    5.15
   1  13 -16   79.96    9.53
  -1 -13  16   83.10    9.57
  -1 -13  16   78.03    4.89
  -1  13  16   81.02    7.77
  -1  13  16   92.81    4.99
  -1 -13  16   74.83    6.29
  -1 -13  16   87.80    5.55
  -1 -13  15   13.84    3.99
  -1  13  15    6.05    1.42
  -1 -13  15    6.62    1.55
  -1 -13  15    8.10    1.64
   1  13 -15    2.08    1.62
  -1 -13  15   10.86    2.50
   1 -13 -15    9.62    3.38
  -1  13  15    9.20    2.74
   1 -13 -14   11.80    3.36
  -1 -13  14    8.10    1.69
  -1  13  14    3.56    0.98
  -1 -13  14    8.72    2.08
  -1  13  14   11.56    3.16
  -1 -13  14    4.91    1.44
  -1 -13  14    9.50    3.12
   1  13 -14    1.82    1.30
  -1 -13  13  256.80   15.56
  -1 -13  13  221.93    7.96
  -1 -13  13  237.64   11.23
   1 -13 -13  262.08   16.45
  -1  13  13  246.21    7.94
  -1 -13  13  240.91    9.37
  -1  13  13  246.42   13.56
  -1  13  12   17.44    3.82
  -1  13  12   17.83    2.17
  -1 -13  12   17.20    3.03
  -1 -13  12   20.69    4.32
   1  13 -12   15.22    3.91
  -1 -13  12   17.79    2.60
   1 -13 -12   17.94    4.38
  -1 -13  12   17.40    2.15
  -1 -13  11    0.48    0.42
   1  13 -11   -1.27    0.95
  -1 -13  11    1.03    0.73
  -1  13  11   -0.42    1.12
  -1 -13  11    0.60    1.29
  -1 -13  11    0.51    0.74
   1 -13 -11   -0.31    1.11
  -1  13  10   75.57    7.52
  -1 -13  10   86.60    6.78
   1  13 -10   65.39    7.92
  -1 -13  10   79.10    5.32
  -1 -13  10   74.69    4.37
  -1 -13  10   85.74    8.32
   1 -13 -10   92.89    9.22
   1 -13  -9   79.57    8.44
   1  13  -9   70.97    8.09
  -1 -13   9   74.73    6.27
  -1  13   9   70.87    7.32
  -1 -13   9   81.01    7.87
  -1 -13   9   75.09    4.31
  -1 -13   9   83.73    5.53
  -1 -13   8   17.27    2.47
  -1 -13   8   15.85    3.41
   1  13  -8   16.19    3.80
  -1 -13   8   15.90    1.92
  -1  13   8   17.25    3.56
  -1 -13   8   16.13    2.95
   1 -13  -8   14.16    3.47
  -1 -13   7   74.75    4.11
  -1  13   7   79.00    7.78
   1  13  -7   66.26    7.52
  -1 -13   7   79.49    6.64
  -1 -13   7   81.19    5.35
   1 -13  -7   79.91    8.23
  -1 -13   7   84.20    7.68
  -1 -13   6   10.14    2.49
  -1 -13   6    8.95    1.41
  -1 -13   6   10.27    2.46
  -1  13   6   10.10    2.89
  -1 -13   6    9.87    1.90
   1  13  -6    5.62    2.28
   1 -13  -6   11.01    3.08
  -1 -13   5    4.79    1.45
  -1  13   5    1.41    1.07
   1  13  -5    0.14    1.12
  -1 -13   5    1.36    0.73
  -1 -13   5    1.86    1.00
   1 -13  -5    1.24    1.05
  -1  13   4  348.97   16.27
   1 -13  -4  357.51   16.60
  -1 -13   4  348.85   14.20
  -1 -13   4  361.90   14.80
   1  13  -4  326.08   15.94
   1 -13  -3  704.63   22.87
  -1 -13   3  660.12   19.72
  -1  13   3  664.63   22.48
  -1 -13   3  698.24   20.08
   1 -13  -2  391.28   16.80
  -1 -13   2  376.08   15.08
   1  13  -2  417.95   17.62
  -1  13   2  372.07   16.86
  -1  13   1  104.92    9.04
  -1 -13   1  103.27    8.01
   1 -13  -1  107.63    8.67
   1  13  -1  102.25    8.62
   1  13   0    1.78    0.95
  -1 -13   0    1.02    0.78
  -1  13   0    2.80    1.25
   1 -13   0    0.61    0.53
  -1 -13  -1   23.98    3.90
   1 -13   1   32.46    4.72
   1  13   1   32.47    4.72
  -1  13  -1   29.66    4.82
   1 -13   2  297.06   14.04
  -1 -13  -2  282.57   13.74
  -1  13  -2  268.39   14.47
   1 -13   3  791.91   22.67
  -1 -13  -3  757.61   22.88
  -1  13  -3  710.88   23.59
  -1 -13  -4   56.09    6.35
   1 -13   4   57.37    6.07
  -1  13  -4   55.40    6.71
   1 -13   5    0.98    0.70
   1 -13   5    0.56    0.68
   1 -13   5    1.42    0.74
  -1  13  -5    0.76    1.47
  -1 -13  -5    0.32    0.75
   1  13   5    0.13    0.66
   1 -13   6   59.09    6.03
   1 -13   6   49.97    3.32
   1 -13   6   51.81    4.10
   1  13   6   54.79    6.45
  -1 -13  -6   56.17    6.55
  -1  13  -6   53.42    6.65
   1 -13   6   54.53    6.27
   1 -13   7   20.03    2.60
   1  13   7   17.44    3.65
   1 -13   7   19.03    3.37
  -1  13  -7   17.43    3.93
  -1 -13  -7   18.82    3.83
   1 -13   7   16.87    1.99
   1 -13   7   16.80    3.55
   1 -13   8   51.30    3.47
   1  13   8   48.81    6.09
   1 -13   8   49.87    5.47
   1 -13   8   52.25    6.39
  -1  13  -8   43.69    6.06
  -1 -13  -8   53.78    6.64
   1 -13   8   56.28    4.41
  -1 -13  -9  104.46    9.46
   1 -13   9  106.11    9.27
   1 -13   9  104.90    7.90
   1 -13   9   93.37    4.80
  -1  13  -9   91.79    8.76
   1 -13   9  103.81    5.97
   1  13   9  104.25    8.85
   1  13   9   96.15    4.81
   1  13  10    5.05    1.21
   1 -13  10    5.70    1.17
   1  13  10    4.76    1.92
  -1  13 -10    4.22    1.95
   1 -13  10    5.11    1.95
   1 -13  10    5.57    2.13
   1 -13  10    5.90    1.57
  -1 -13 -10    7.77    2.49
   1 -13  11    2.02    1.55
  -1  13 -11    0.78    0.76
   1 -13  11    2.07    1.19
   1 -13  11    1.06    0.96
   1 -13  11    2.64    0.94
   1  13  11    1.73    0.74
   1  13  11    2.86    1.37
  -1 -13 -11    1.46    1.14
   1 -13  12   18.74    2.31
   1 -13  12   18.09    3.27
   1  13  12   17.63    2.12
  -1  13 -12   18.84    3.99
  -1 -13 -12   17.55    3.95
   1  13  12   21.69    4.09
   1 -13  12   20.97    4.44
   1 -13  12   19.75    2.72
   1 -13  13  112.31    5.63
   1  13  13  124.28    9.54
  -1  13 -13  117.35    9.59
   1 -13  13  124.03    6.54
   1 -13  13  125.50   11.03
   1 -13  13  112.85    8.14
  -1 -13 -13  124.26   11.13
   1  13  13  120.18    5.56
   1  13  14   -0.10    0.79
   1 -13  14    0.92    0.97
   1  13  14    1.18    0.63
  -1  13 -14    1.06    1.28
   1 -13  14    1.30    1.41
   1 -13  14   -0.35    0.84
   1 -13  14    1.75    0.76
   1 -13  15    3.63    1.79
   1 -13  15    1.14    0.77
   1  13  15    1.83    1.02
   1 -13  15    1.89    0.88
   1 -13  15    2.83    1.55
   1  13  15    1.61    0.69
  -1  13 -15    3.49    2.03
   1 -13  16  176.64   14.04
   1 -13  16  155.04    6.85
   1 -13  16  154.11    7.28
   1  13  16  151.29    6.42
   1 -13  16  173.19   10.21
   1  13  16  162.59   10.83
  -1 -13 -16  138.41    5.66
   1  13  17   25.46    4.41
   1  13  17   32.78    3.02
   1 -13  17   29.30    3.22
   1 -13  17   21.25    3.60
  -1 -13 -17   33.08    2.81
   1 -13  17   27.85    5.74
   1 -13  17   25.79    2.84
   1 -13  18  103.58    5.66
   1 -13  18  114.01    6.17
   1  13  18  101.20    8.51
   1 -13  18   94.69   10.74
   1 -13  18  105.10    8.01
   1  13  18  127.91    5.97
  -1 -13 -18  130.84    5.48
   1  13  19  154.81    6.63
   1 -13  19  140.97    6.80
   1 -13  19  137.16   13.22
  -1 -13 -19  146.06    5.76
   1  13  19  133.84    9.67
   1 -13  19  148.81    9.66
   1 -13  19  132.02    6.44
   1 -13  20    3.95    2.47
   1 -13  20    3.49    1.56
   1  13  20    2.65    0.90
  -1 -13 -20    2.34    0.93
   1 -13  20    2.45    0.95
   1  13  20    3.17    1.58
   1 -13  20    3.03    1.05
   1 -13  21   17.49    2.40
   1 -13  21   19.25    3.56
   1 -13  21   16.79    4.91
  -1 -13 -21   14.06    1.74
   1 -13  21   16.76    2.32
   1  13  21   18.50    2.36
   1 -13  22   30.29    3.01
   1 -13  22   24.06    6.17
   1 -13  22   27.25    4.25
  -1 -13 -22   35.44    2.83
   1 -13  22   26.68    2.92
   1  13  22   31.70    3.08
   1  13  23   17.32    2.21
   1 -13  23   17.49    2.26
   1 -13  23   14.09    2.10
  -1 -13 -23   18.31    2.02
   1  13  24   45.59    3.08
   1 -13  24   38.79    3.29
   1  13  24   43.61    3.09
   1  13  24   44.73    3.62
  -1 -13 -24   40.14    2.98
   1 -13  24   38.15    3.41
   1 -13  25   38.43    3.14
   1  13  25   44.55    3.11
   1  13  25   42.34    3.48
   1  13  25   44.76    3.06
   1 -13  25   40.62    3.50
  -1 -13 -25   39.91    2.95
   1  13  26    2.41    0.82
   1 -13  26    0.71    0.60
   1  13  26    1.38    0.85
  -1 -13 -26    0.71    0.42
   1 -13  26    0.64    0.44
   1  13  26    0.70    0.51
   1 -13  26    1.03    0.55
   1  13  27   33.77    2.79
   1 -13  27   32.18    3.04
   1 -13  27   29.30    2.88
   1  13  27   27.63    2.81
   1 -13  27   27.91    2.55
  -1 -13 -27   25.57    2.36
   1 -13  28   63.57    4.15
  -1 -13 -28   72.69    3.89
   1  13  28   78.25    4.69
   1 -13  28   65.91    4.27
   1  13  28   72.61    3.84
   1  13  28   76.81    4.10
  -1 -13 -29   35.19    2.68
   1  13  29   35.90    3.16
   1  13  29   33.57    2.56
   1 -13  29   29.13    2.86
   1 -13  29   30.42    2.77
   1  13  29   35.95    2.77
   1 -13  30   29.58    2.66
   1  13  30   36.44    3.13
   1 -13  30   28.41    2.78
   1  13  30   31.64    2.49
   1  13  30   33.31    2.69
  -1 -13 -30   36.44    2.69
   1  13  31   29.63    2.36
   1  13  31   31.70    2.93
   1 -13  31   27.62    2.70
   1 -13  31   25.37    2.40
  -1 -13 -31   26.60    2.27
   1  13  31   30.92    2.55
   1  13  32   10.10    1.66
   1 -13  32    9.65    1.59
   1  13  32   10.73    1.47
  -1 -13 -32   10.02    1.38
   1 -13  32    9.51    1.37
   1  13  32   11.29    1.52
   1 -13  33    4.40    0.88
   1  13  33    4.93    0.97
   1 -13  33    3.63    1.08
  -1 -13 -33    4.00    0.94
   1  13  33    5.36    1.14
   1  13  33    4.72    1.11
   1  13  34    0.97    0.56
  -1 -13 -34    0.14    0.27
   1 -13  34    1.10    0.70
   1  13  34    0.77    0.45
   1  13  34    0.72    0.56
   1  13  35   37.26    2.94
   1  13  35   35.11    2.57
   1 -13  35   29.57    2.58
  -1 -13 -35   33.21    2.35
   1  13  35   33.24    2.29
  -1 -13 -36   33.27    2.28
   1 -13  36   33.40    2.67
   1  13  36   38.76    2.64
   1  13  36   40.83    2.99
   1  13  36   38.51    2.37
   1  13  37    1.73    0.71
  -1 -13 -37    0.62    0.36
   1  13  37    0.42    0.48
   1 -13  37    0.78    0.40
   1  13  37    0.82    0.38
   1 -13  38   30.28    2.36
   1  13  38   32.92    2.01
   1  13  38   36.06    2.38
  -1 -13 -38   32.56    2.11
   1  13  38   36.79    2.67
   1  13  39   17.28    1.42
   1  13  39   19.24    1.69
   1  13  39   17.08    1.77
   1 -13  39   16.23    1.66
  -1 -13 -39   15.54    1.44
   1  13  40    5.00    0.69
   1 -13  40    4.52    0.86
  -1 -13 -40    4.75    0.78
   1  13  40    4.98    0.84
   1  13  40    4.89    0.91
   1  13  41    9.50    1.11
  -1 -13 -41    8.77    0.98
   1  13  41    7.53    1.09
   1 -13  41    7.55    1.02
   1  13  41    8.16    0.86
   1  13  42    1.19    0.50
  -1 -13 -42    1.02    0.33
   1 -13  42    1.37    0.46
   1  13  42    1.00    0.30
   1  13  42    1.26    0.39
  -1 -13 -43    1.22    0.38
   1  13  43    2.39    0.57
   1  13  43    2.00    0.32
   1  13  43    1.43    0.50
   1 -13  43    1.45    0.42
   1  13  44   42.53    1.87
   1  13  44   40.00    1.98
   1  13  45   36.57    1.67
  -1 -13 -45   32.72    1.39
  -1  15  41    1.26    0.38
  -1  15  41    1.25    0.27
  -1  15  40   34.05    1.54
  -1  15  40   29.52    1.77
   1 -15 -39   57.82    2.23
  -1  15  39   73.32    2.45
  -1  15  39   63.54    2.19
  -1  15  39   69.39    2.92
  -1  15  38   26.35    1.91
  -1  15  38   24.85    1.50
  -1  15  38   26.20    1.58
   1 -15 -38   22.21    1.48
  -1  15  37    7.46    1.09
  -1  15  37    7.61    0.95
  -1  15  37    7.05    0.85
   1 -15 -37    6.06    0.84
  -1 -15  37    6.45    0.88
  -1  15  36   45.40    2.27
  -1 -15  36   43.73    2.42
   1 -15 -36   40.53    2.21
  -1  15  36   49.63    2.88
  -1  15  36   52.63    2.47
  -1  15  35   19.88    1.60
  -1  15  35   16.41    1.42
  -1 -15  35   15.88    1.51
  -1  15  35   16.52    1.71
  -1 -15  35   17.75    1.43
   1 -15 -35   13.49    1.36
  -1 -15  34   39.54    2.38
  -1 -15  34   36.57    2.43
  -1  15  34   41.04    2.82
   1 -15 -34   32.01    2.14
  -1  15  34   45.27    2.47
  -1  15  34   38.81    2.28
  -1 -15  33    4.01    0.87
  -1  15  33    4.42    0.98
  -1 -15  33    4.15    0.82
  -1  15  33    3.54    0.71
  -1  15  33    5.40    0.93
   1 -15 -33    3.86    0.77
  -1  15  32   27.66    2.41
  -1 -15  32   25.80    2.18
  -1 -15  32   23.36    2.10
   1 -15 -32   21.46    1.84
  -1  15  32   27.48    2.07
  -1  15  32   24.87    1.96
  -1  15  31    8.40    1.36
  -1 -15  31    9.41    1.34
  -1 -15  31    7.53    1.23
  -1  15  31    9.83    1.28
  -1  15  31    8.84    1.22
   1 -15 -31    8.33    1.21
  -1  15  30   27.55    2.13
  -1  15  30   27.70    2.53
  -1 -15  30   29.20    2.54
  -1  15  30   35.59    2.46
   1 -15 -29   60.72    3.37
  -1  15  29   70.09    3.57
  -1  15  29   60.65    3.20
  -1 -15  29   60.21    3.78
  -1  15  29   68.50    4.03
  -1  15  28   71.71    3.64
  -1 -15  28   53.76    3.20
   1 -15 -28   50.55    3.14
  -1  15  28   62.14    3.93
  -1 -15  28   61.49    3.93
   1 -15 -27    3.91    0.88
  -1 -15  27    4.32    1.00
  -1 -15  27    3.48    0.99
  -1  15  27    6.07    1.12
  -1  15  27    4.17    1.07
  -1 -15  26    0.64    0.54
   1 -15 -26    0.44    0.42
  -1  15  26    0.72    0.46
  -1 -15  26    0.71    0.53
  -1  15  26   -0.22    0.54
  -1 -15  25    2.40    0.86
  -1  15  25    2.75    0.88
   1 -15 -25    1.19    0.58
  -1  15  25    2.45    0.95
  -1 -15  25    1.82    0.78
  -1 -15  24  236.15    7.97
  -1  15  24  272.19    7.44
  -1 -15  24  246.50    8.64
  -1  15  24  259.47    8.37
  -1  15  23  182.31    7.00
  -1 -15  23  176.81    7.42
  -1 -15  23  173.86    7.08
  -1  15  23  191.11    6.30
  -1 -15  22   23.54    2.68
   1 -15 -22   22.20    2.28
  -1  15  22   22.14    2.16
  -1 -15  22   21.70    2.63
  -1  15  22   27.92    2.76
  -1 -15  21   18.82    2.42
  -1  15  21   19.04    2.01
   1 -15 -21   16.18    2.01
  -1  15  21   19.92    2.37
  -1 -15  21   17.42    2.34
  -1  15  20    2.71    1.00
   1 -15 -20    2.67    0.94
  -1 -15  20    3.04    1.04
  -1 -15  20    3.07    1.10
  -1  15  20    2.89    0.84
  -1  15  19    0.73    0.54
  -1 -15  19    2.06    0.87
  -1 -15  19    0.33    0.50
  -1  15  19    1.62    0.74
  -1 -15  18   64.66    4.70
  -1  15  18   63.14    3.71
  -1  15  18   72.74    4.47
  -1 -15  18   65.67    4.85
  -1 -15  17   85.54    5.39
  -1  15  17   96.43    5.14
  -1  15  17   90.78    4.43
  -1 -15  17   94.12    5.87
  -1  15  16  277.66    8.70
  -1 -15  16  251.83    9.13
  -1 -15  16  267.81    9.98
  -1 -15  15    2.27    0.84
  -1  15  15    2.54    0.93
  -1 -15  15    1.57    0.93
  -1 -15  14    1.24    0.71
  -1 -15  14    0.81    0.62
  -1  15  14    0.91    0.75
  -1 -15  13    0.11    1.63
  -1 -15  13    1.32    1.07
  -1 -15  13    1.25    0.81
  -1  15  13    1.71    0.76
  -1 -15  13    3.18    1.13
  -1 -15  12   39.30    3.88
   1 -15 -12   35.28    6.33
  -1 -15  12   34.81    3.29
  -1 -15  12   34.27    4.74
  -1  15  12   38.40    5.88
  -1  15  12   39.69    3.21
  -1 -15  12   41.55    6.61
  -1 -15  11   20.20    2.48
  -1  15  11   24.01    4.74
  -1 -15  11   22.68    3.06
  -1 -15  11   26.02    5.20
   1 -15 -11   25.03    5.27
  -1 -15  11   24.79    3.99
   1 -15 -10    3.77    1.96
  -1 -15  10    5.87    1.32
  -1 -15  10    8.04    1.90
  -1 -15  10    2.58    1.68
  -1  15  10    5.61    2.34
  -1 -15   9   69.38    6.72
  -1  15   9   73.94    8.17
  -1 -15   9   73.83    5.41
   1 -15  -9   68.90    8.39
  -1 -15   9   71.08    4.45
  -1 -15   8   70.94    6.78
  -1 -15   8   91.66    6.01
  -1 -15   8   78.49    4.62
  -1  15   8   75.04    8.22
   1 -15  -8   73.30    8.54
   1 -15  -8   85.04    4.36
  -1  15   7   29.09    5.08
  -1 -15   7   32.43    3.68
   1 -15  -7   33.06    2.34
   1 -15  -7   28.61    2.60
  -1 -15   7   30.49    2.82
   1 -15  -7   31.96    5.51
  -1 -15   7   29.68    4.42
   1 -15  -6   27.57    5.10
   1 -15  -6   27.91    2.16
  -1 -15   6   27.48    3.25
   1 -15  -6   23.31    2.39
  -1 -15   6   25.63    4.13
  -1 -15   6   28.03    2.64
  -1  15   6   28.97    5.12
   1 -15  -5   16.57    2.13
  -1 -15   5   15.58    3.42
   1  15  -5   15.19    3.79
  -1 -15   5   16.98    2.68
  -1  15   5   16.11    3.87
   1 -15  -5   15.60    1.69
   1 -15  -5   16.37    4.02
  -1 -15   5   16.41    2.12
  -1 -15   4  600.24   20.47
   1 -15  -4  590.28   12.60
   1  15  -4  559.45   23.27
   1 -15  -4  596.78   23.46
  -1 -15   4  584.77   11.62
  -1  15   4  609.96   23.61
   1 -15  -4  594.54   10.40
  -1 -15   4  618.95   15.29
   1  15  -3   63.63    7.86
   1 -15  -3   67.54    3.58
   1 -15  -3   70.89    4.54
  -1  15   3   67.98    8.04
  -1 -15   3   67.74    3.95
  -1 -15   3   63.46    6.85
  -1 -15   3   75.94    5.49
   1 -15  -3   68.41    7.86
   1  15  -2    5.62    2.34
  -1 -15   2    3.77    1.56
   1 -15  -2    7.27    2.60
  -1 -15   2    5.61    2.11
   1 -15  -2    3.28    1.12
   1 -15  -2    3.80    0.93
  -1  15   2    8.21    2.86
  -1 -15   2    4.14    1.01
   1 -15  -1   76.87    8.10
   1 -15  -1   80.21    4.00
  -1 -15   1   93.47    5.81
  -1 -15   1   73.70    7.42
  -1  15   1   70.93    8.26
  -1 -15   1   81.76    4.13
   1  15  -1   67.20    8.01
   1 -15  -1   89.79    5.25
   1 -15   0   19.85    4.08
   1 -15   0   17.06    1.88
   1 -15   0   18.03    2.49
  -1 -15   0   16.15    2.38
  -1 -15   0   16.77    3.58
   1  15   0   18.07    4.22
  -1  15   0   19.52    4.30
  -1 -15   0   16.89    1.87
  -1  15  -1    1.91    1.44
  -1 -15  -1   -0.06    0.57
   1 -15   1    2.00    1.56
   1  15   1    1.89    1.45
   1 -15   1    1.58    1.18
  -1 -15  -1    0.60    0.65
  -1 -15  -1    0.71    0.57
   1 -15   1    0.85    0.58
  -1 -15  -2    2.43    0.84
  -1 -15  -2    1.80    1.28
  -1 -15  -2    2.03    1.01
  -1  15  -2    1.55    1.40
   1 -15   2    1.79    1.40
   1 -15   2    1.25    0.62
   1 -15   2    2.62    1.07
   1  15   2   -0.59    1.04
   1 -15   3  231.51    9.05
   1  15   3  209.72   14.04
  -1 -15  -3  221.20   13.52
  -1 -15  -3  223.96    8.18
   1 -15   3  217.30   13.11
  -1  15  -3  202.44   13.93
  -1 -15  -3  216.60    6.28
   1 -15   3  210.02    6.93
  -1 -15  -4  318.76   16.48
   1  15   4  301.83   16.80
  -1  15  -4  296.01   16.85
   1 -15   4  332.27   10.98
   1 -15   4  297.92    8.39
  -1 -15  -4  318.52    9.43
  -1 -15  -4  324.89    7.54
   1 -15   4  321.25   15.76
   1 -15   5    2.77    1.15
   1  15   5    3.53    2.03
  -1  15  -5    2.67    1.69
  -1 -15  -5    3.64    1.06
  -1 -15  -5    3.55    1.69
   1 -15   5    3.93    1.07
   1 -15   5    6.43    2.24
  -1  15  -6    9.44    3.35
  -1 -15  -6   11.56    1.90
   1 -15   6   12.30    3.22
   1  15   6   11.97    3.26
   1 -15   6   15.33    2.45
  -1 -15  -6   11.50    3.13
   1 -15   6   11.39    1.67
  -1 -15  -7   27.22    2.60
   1 -15   7   26.20    2.63
   1  15   7   28.46    2.67
  -1 -15  -7   30.19    5.31
   1  15   7   26.77    5.08
   1 -15   7   25.56    3.16
  -1  15  -7   23.48    4.88
   1 -15   7   27.84    4.50
   1 -15   8   22.21    4.01
  -1 -15  -8   20.08    2.22
   1 -15   8   19.76    2.36
   1  15   8   17.44    2.13
  -1 -15  -8   20.64    4.33
   1  15   8   22.02    4.48
   1 -15   8   19.13    2.72
  -1  15  -8   17.77    4.40
  -1 -15  -9    6.26    2.53
  -1  15  -9    4.37    2.33
  -1 -15  -9    3.86    1.09
   1 -15   9    4.45    1.38
   1 -15   9    3.08    1.74
   1  15   9    3.65    1.95
   1  15   9    5.15    1.31
   1 -15   9    3.56    1.08
   1 -15  10    0.47    0.54
   1 -15  10    0.66    0.58
  -1  15 -10   -0.96    0.85
   1  15  10    0.07    1.14
   1 -15  10   -0.09    0.84
  -1 -15 -10   -0.12    0.96
   1  15  10    0.43    0.60
   1  15  11    0.75    0.62
   1 -15  11   -0.14    0.65
  -1  15 -11    0.91    1.43
   1 -15  11    2.66    1.02
  -1 -15 -11   -1.02    1.13
   1 -15  11    0.24    0.52
   1  15  11    0.26    1.23
   1  15  12   67.13    4.31
   1 -15  12   68.23    5.19
   1 -15  12   62.47    4.40
   1  15  12   67.30    7.61
  -1 -15 -12   63.34    8.17
   1 -15  12   64.12    6.60
  -1  15 -12   60.95    7.58
   1 -15  13    9.49    1.83
   1 -15  13   11.94    2.26
   1  15  13   11.91    1.84
   1 -15  13   14.82    4.29
   1 -15  14    2.49    1.11
   1 -15  14    0.52    0.68
   1  15  14    1.34    0.72
   1 -15  15  116.39    6.18
   1  15  15  115.17    5.73
   1 -15  15  120.10    6.76
   1  15  16  173.58    7.07
   1 -15  16  181.38    8.22
   1 -15  16  176.66    7.68
   1  15  17   39.84    3.39
   1 -15  17   38.72    3.82
   1 -15  17   34.45    3.45
   1 -15  18    0.66    0.64
   1 -15  18    0.92    1.02
   1  15  18    0.04    0.40
  -1 -15 -19   35.90    2.90
   1  15  19   35.01    3.19
   1 -15  19   30.38    3.20
   1 -15  19   26.94    3.01
  -1 -15 -20    1.05    0.57
   1 -15  20    1.19    0.66
   1  15  20    0.36    0.43
   1 -15  20    1.53    0.94
   1 -15  21   17.42    2.39
   1 -15  21   16.56    2.32
  -1 -15 -21   16.32    1.91
   1  15  21   19.85    2.42
   1 -15  22    0.29    0.50
   1  15  22    0.54    0.39
  -1 -15 -22    1.16    0.57
   1 -15  22    1.14    0.85
   1  15  22    1.05    0.78
   1  15  23   33.58    3.11
   1 -15  23   26.77    2.89
   1  15  23   27.27    2.41
  -1 -15 -23   26.60    2.43
   1 -15  23   27.92    2.83
   1 -15  24  195.44    7.64
   1  15  24  216.41    6.63
  -1 -15 -24  164.74    5.89
   1 -15  24  184.27    7.04
   1  15  24  207.49    7.52
   1  15  25   60.06    3.34
   1  15  25   64.81    4.18
   1 -15  25   62.91    3.98
   1  15  25   64.89    3.60
  -1 -15 -25   51.75    3.24
   1 -15  25   61.68    4.21
   1 -15  26    8.17    1.45
   1  15  26    8.86    1.33
  -1 -15 -26    8.05    1.26
   1 -15  26    9.20    1.66
   1  15  26    9.29    1.37
   1  15  26    7.60    1.46
   1  15  27    1.89    0.64
  -1 -15 -27    1.39    0.54
   1 -15  27    1.42    0.57
   1  15  27    2.33    0.91
   1  15  27    2.82    0.79
   1 -15  27    1.81    0.65
   1  15  28   47.55    2.98
   1  15  28   45.26    3.38
   1  15  28   41.53    2.73
   1 -15  28   39.96    2.73
   1 -15  28   41.25    3.18
  -1 -15 -28   36.59    2.59
   1  15  29  152.38    5.17
  -1 -15 -29  123.34    4.66
   1  15  29  152.56    6.06
   1 -15  29  129.80    4.59
   1 -15  29  136.40    5.55
   1  15  29  143.44    5.01
   1  15  30   11.13    1.39
   1 -15  30    8.83    1.39
  -1 -15 -30    6.59    1.09
   1  15  30    9.03    1.50
   1 -15  31    0.26    0.50
  -1 -15 -31    0.59    0.43
   1  15  31    0.30    0.29
   1  15  31    0.23    0.39
   1  15  31    0.64    0.49
  -1 -15 -32   29.84    2.13
   1  15  32   38.91    2.42
   1  15  32   36.47    2.82
   1  15  32   34.17    2.31
   1 -15  32   32.30    2.34
   1  15  33    0.51    0.60
  -1 -15 -33    1.32    0.52
   1  15  33    0.54    0.37
   1 -15  33    0.83    0.35
   1  15  33    0.38    0.27
   1  15  34   26.15    1.87
   1  15  34   21.38    2.07
   1  15  34   21.10    1.68
   1 -15  34   24.72    1.74
   1  15  35    5.62    0.86
   1  15  35    5.48    1.00
  -1 -15 -35    4.43    0.80
   1  15  35    6.17    0.90
   1  15  36   35.42    2.02
   1  15  36   37.17    2.05
   1  15  36   37.29    2.48
  -1 -15 -36   31.26    1.89
  -1 -15 -37   11.83    1.13
   1  15  37   15.48    1.30
   1  15  37   14.44    1.48
   1  15  38   24.04    1.84
   1  15  38   21.02    1.43
   1  15  38   22.44    1.41
  -1 -15 -38   20.72    1.40
   1  15  39   60.37    2.73
   1  15  39   66.77    2.23
   1  15  39   60.08    2.21
   1  15  40   56.05    1.84
   1  15  40   52.23    2.38
  -1 -15 -41    1.45    0.33
   1  15  41    1.28    0.36
  -1  17  36    9.28    0.80
  -1  17  35   23.37    1.36
  -1  17  35   22.87    1.48
  -1  17  34    1.02    0.37
  -1  17  34    0.14    0.22
  -1 -17  34    0.57    0.27
  -1 -17  33   12.35    1.09
  -1  17  33   13.15    1.13
  -1  17  33   13.06    1.29
   1 -17 -32    1.18    0.33
  -1  17  32    1.71    0.51
  -1  17  32    2.31    0.52
  -1 -17  32    2.27    0.54
  -1 -17  31    2.87    0.68
  -1  17  31    2.37    0.61
   1 -17 -31    1.66    0.41
  -1  17  31    2.20    0.46
  -1 -17  30    0.41    0.28
  -1  17  30    0.64    0.27
  -1  17  30   -0.29    0.35
   1 -17 -30    0.33    0.31
  -1  17  29    4.75    0.91
  -1 -17  29    4.11    0.69
  -1 -17  29    5.25    1.02
   1 -17 -29    3.36    0.62
  -1  17  29    5.35    0.86
  -1 -17  28  153.26    5.42
  -1  17  28  149.26    5.14
  -1 -17  28  141.99    4.36
  -1  17  27    1.83    0.62
  -1 -17  27    2.00    0.67
  -1 -17  27    3.66    0.93
  -1  17  27    2.89    0.77
  -1  17  26   21.43    1.83
  -1 -17  26   20.00    2.09
  -1 -17  26   18.88    1.83
  -1  17  26   19.66    1.97
  -1 -17  25    0.89    0.67
  -1 -17  25    0.51    0.32
  -1  17  25    0.34    0.29
  -1  17  25    1.37    0.61
  -1 -17  24  151.11    6.16
  -1 -17  24  147.81    5.71
  -1  17  24  145.57    5.52
  -1  17  24  161.87    5.22
  -1  17  23   10.82    1.60
  -1 -17  23   12.18    1.76
  -1 -17  23   11.16    1.77
  -1  17  23    9.52    1.36
  -1  17  22    2.33    0.80
  -1 -17  22    2.15    0.95
  -1  17  22    2.67    0.73
  -1 -17  22    2.87    0.96
  -1 -17  21   10.09    1.76
  -1  17  21   12.06    1.54
  -1 -17  21   10.16    1.77
  -1  17  21    9.29    1.48
  -1  17  20   30.01    2.38
  -1 -17  20   29.12    2.98
  -1  17  20   25.93    2.45
  -1 -17  20   24.74    2.67
  -1  17  19  110.00    5.04
  -1 -17  19  118.38    5.96
  -1 -17  19  108.32    5.73
  -1  17  19  113.57    4.65
  -1  17  18    1.49    0.67
  -1 -17  18    0.65    0.71
  -1 -17  18    1.39    0.53
  -1  17  18    1.22    0.63
  -1 -17  17   23.52    2.77
  -1  17  17   20.81    2.22
  -1  17  17   24.85    2.21
  -1 -17  17   23.88    2.90
  -1 -17  16   33.12    3.43
  -1  17  16   32.93    2.75
  -1 -17  16   34.48    3.30
  -1  17  16   31.47    2.52
  -1  17  15   88.84    4.23
  -1 -17  15   89.07    5.63
  -1 -17  15   89.84    5.31
  -1 -17  14   19.67    2.55
  -1 -17  14   19.29    2.61
  -1  17  14   18.44    1.95
  -1 -17  13   13.55    2.28
  -1  17  13   10.60    1.45
  -1 -17  13   13.76    2.09
  -1  17  12    1.20    0.60
  -1 -17  12    2.02    0.74
  -1 -17  12    2.46    0.86
  -1 -17  11    1.54    1.10
  -1  17  11    1.38    0.64
  -1 -17  11   -0.21    0.67
  -1 -17  10    3.09    1.29
  -1 -17  10    1.22    0.78
  -1 -17   9   50.58    4.45
   1 -17  -9   49.55    3.06
  -1 -17   9   47.67    3.68
  -1 -17   8   97.12    6.18
   1 -17  -8   89.88    4.29
  -1 -17   8   90.05    4.98
  -1 -17   7   81.24    5.69
   1 -17  -7   70.69    3.91
  -1 -17   7   78.36    4.55
  -1 -17   6    5.44    1.28
  -1 -17   6    4.90    1.70
   1 -17  -6    4.32    0.87
   1 -17  -6    5.03    1.11
   1 -17  -5    3.76    1.10
  -1 -17   5    5.23    1.21
  -1 -17   5    6.93    1.96
   1 -17  -5    4.10    0.84
  -1 -17   4  262.25    9.96
   1 -17  -4  240.48    7.85
   1 -17  -4  255.76    6.75
  -1 -17   4  251.39    7.71
   1 -17  -3   20.31    2.39
  -1 -17   3   20.38    2.86
   1 -17  -3   20.03    1.98
  -1 -17   3   19.04    2.11
   1 -17  -2    0.01    0.31
  -1 -17   2    0.34    0.38
   1 -17  -2    0.83    0.71
  -1 -17   2    1.12    0.82
   1 -17  -1   26.72    2.32
   1 -17  -1   30.99    3.06
  -1 -17   1   26.54    2.36
  -1 -17   1   32.71    3.41
  -1 -17   0    0.11    0.54
   1 -17   0    0.95    0.70
  -1 -17   0   -0.29    0.51
   1 -17   0    0.56    0.38
  -1 -17  -1   23.59    2.75
   1 -17   1   23.16    2.26
   1 -17   1   23.67    2.79
  -1 -17  -1   21.93    2.07
  -1 -17  -2    0.44    0.47
   1 -17   2    0.35    0.49
  -1 -17  -2    0.25    0.30
   1 -17   2    0.38    0.32
   1 -17   3    1.36    0.84
  -1 -17  -3    2.45    1.00
  -1 -17  -3    1.07    0.64
   1 -17   3    1.12    1.01
   1 -17   4  207.28    8.66
  -1 -17  -4  192.20    7.24
  -1 -17  -4  206.35    5.92
   1 -17   4  200.84    6.97
   1 -17   5    1.84    0.90
   1 -17   5    0.42    0.82
  -1 -17  -5    1.03    0.62
   1 -17   6   14.60    2.33
  -1 -17  -6   12.56    1.81
   1 -17   6   13.61    1.89
   1 -17   7   25.17    2.62
   1 -17   7   27.11    3.22
  -1 -17  -7   26.21    2.51
  -1 -17  -8   56.26    3.49
   1 -17   8   62.83    4.91
   1 -17   8   56.74    4.00
   1 -17   9   99.55    6.12
  -1 -17  -9   90.12    4.27
   1 -17   9   92.65    5.15
   1 -17  10    4.79    1.38
   1  17  10    3.90    0.99
   1 -17  10    5.21    1.45
   1  17  11    3.30    0.97
   1 -17  11    3.15    1.06
   1 -17  11    3.12    1.20
   1 -17  12    7.12    1.65
   1 -17  12    9.12    1.72
   1  17  12    8.24    1.46
   1  17  13  147.83    6.15
   1 -17  13  157.06    7.62
   1 -17  13  138.00    6.53
   1 -17  14    1.90    1.06
   1  17  14    1.43    0.74
   1 -17  14    2.70    1.13
   1 -17  15   53.54    4.32
   1  17  15   50.62    3.59
   1 -17  15   50.67    3.99
   1 -17  16   30.43    3.25
   1  17  16   27.72    2.67
   1 -17  16   30.10    3.10
   1  17  17   31.98    2.53
   1 -17  17   31.03    3.11
   1  17  17   29.18    2.74
   1 -17  17   30.16    3.16
   1  17  18   13.81    1.66
   1  17  18   10.19    1.57
   1 -17  18   13.14    2.08
   1 -17  18   14.33    2.13
   1  17  19   44.10    3.32
   1 -17  19   43.17    3.60
   1  17  19   37.65    2.71
   1 -17  19   44.09    3.66
   1 -17  20   60.98    4.23
   1  17  20   63.39    3.48
   1  17  20   54.71    3.64
   1 -17  20   59.53    4.17
   1  17  21    0.73    0.35
   1 -17  21    1.07    0.55
   1  17  21    1.65    0.65
   1 -17  21    0.34    0.41
   1 -17  22    0.69    0.45
   1  17  22    1.64    0.66
   1 -17  22    0.57    0.48
   1  17  22    1.98    0.64
   1 -17  23    3.26    1.00
   1 -17  23    2.13    0.72
   1  17  23    3.76    1.06
   1  17  23    2.24    0.81
   1 -17  24  245.25    7.27
   1  17  24  253.92    7.49
   1 -17  24  259.24    7.98
   1  17  25    4.77    1.07
   1 -17  25    6.06    1.13
   1 -17  25    6.16    1.28
   1  17  25    4.92    0.96
   1  17  26    4.72    0.89
   1  17  26    5.43    1.08
   1 -17  26    4.10    0.96
   1 -17  26    4.71    0.90
  -1 -17 -26    4.23    0.81
   1  17  27    3.58    0.93
  -1 -17 -27    2.25    0.53
   1 -17  27    3.90    0.95
   1 -17  27    4.07    0.87
   1  17  28   72.23    3.19
   1  17  28   68.98    3.60
   1 -17  28   63.30    2.88
   1 -17  28   68.01    3.52
   1 -17  29   15.61    1.31
   1 -17  29   16.11    1.62
  -1 -17 -29   14.89    1.37
   1  17  29   15.70    1.46
   1  17  29   16.51    1.71
  -1 -17 -30    1.09    0.40
   1 -17  30    0.86    0.48
   1  17  30    1.42    0.47
   1  17  30    1.17    0.59
  -1 -17 -31    4.31    0.67
   1 -17  31    6.47    0.86
   1  17  31    7.08    0.95
   1  17  31    5.71    0.93
   1 -17  32    7.41    0.89
   1  17  32    7.52    1.06
   1  17  32    7.50    0.90
  -1 -17 -32    5.09    0.69
   1 -17  33   21.77    1.30
   1  17  33   22.53    1.72
   1  17  33   24.33    1.55
   1  17  34    8.72    1.06
   1  17  34   10.47    0.98
   1  17  35   31.49    1.79
   1  17  35   33.44    1.58
   1  17  36    1.48    0.32
   1  17  36    0.96    0.26
  -1  19  30    0.70    0.28
  -1  19  29    0.06    0.18
  -1 -19  29    0.39    0.17
  -1  19  28   75.85    2.48
  -1 -19  28   78.29    2.88
  -1 -19  27   19.06    1.55
  -1  19  27   18.09    1.27
  -1 -19  26    0.76    0.29
  -1  19  26    0.27    0.18
  -1  19  25   21.09    1.47
  -1 -19  25   19.88    1.77
  -1 -19  25   16.87    1.41
  -1  19  24   69.65    2.75
  -1 -19  24   70.97    3.45
  -1 -19  24   66.81    3.01
  -1 -19  23    7.93    1.13
  -1  19  23    9.95    1.09
  -1 -19  23   10.97    1.43
  -1 -19  22   12.26    1.44
  -1  19  22   12.21    1.22
  -1 -19  22   14.76    1.71
  -1 -19  21    0.19    0.31
  -1  19  21    0.49    0.40
  -1 -19  20   48.11    3.15
  -1 -19  20   51.28    3.31
  -1  19  20   46.87    2.49
  -1 -19  19    1.68    0.79
  -1 -19  19    1.31    0.63
  -1  19  19    1.00    0.48
  -1 -19  18    8.26    1.38
  -1  19  18    7.27    1.04
  -1 -19  18    9.76    1.55
  -1  19  17   29.66    2.06
  -1 -19  17   28.25    2.64
  -1 -19  17   30.41    2.68
  -1  19  16    0.90    0.45
  -1 -19  16    1.96    0.98
  -1 -19  16    1.53    0.87
  -1 -19  15   78.38    4.61
  -1  19  15   69.32    3.18
  -1 -19  15   82.09    4.53
  -1  19  14    1.73    0.62
  -1 -19  14    1.78    0.74
  -1 -19  14    2.48    0.94
  -1 -19  13   56.04    3.72
  -1 -19  13   63.49    4.29
  -1  19  13   52.24    2.80
  -1 -19  12    7.06    1.36
  -1 -19  12    6.27    1.49
  -1  19  12    6.51    1.04
  -1 -19  11   16.59    1.98
  -1  19  11   14.44    1.48
  -1 -19  11   15.15    2.18
  -1 -19  10    3.70    0.94
  -1  19  10    2.68    0.66
  -1 -19  10    3.86    1.15
  -1  19   9   14.35    1.49
  -1 -19   9   15.28    1.89
  -1 -19   9   11.82    2.01
  -1 -19   8   59.05    3.66
  -1 -19   8   59.48    4.36
  -1 -19   7  107.31    4.85
  -1 -19   7  107.62    5.87
   1 -19  -7   95.52    3.93
  -1 -19   6    3.90    1.31
  -1 -19   6    3.91    1.03
   1 -19  -6    2.31    0.65
   1 -19  -5   28.12    1.96
   1 -19  -5   25.86    2.23
  -1 -19   5   28.77    3.02
  -1 -19   5   27.84    2.39
  -1 -19   4   28.00    2.36
   1 -19  -4   27.83    2.36
   1 -19  -4   28.37    2.03
  -1 -19   4   29.65    3.09
   1 -19  -3   61.19    3.02
  -1 -19   3   59.11    4.21
   1 -19  -3   53.24    3.42
  -1 -19   3   57.67    3.31
  -1 -19   2    4.32    0.97
   1 -19  -2    4.08    1.00
   1 -19  -2    3.75    0.84
  -1 -19   2    4.21    1.21
   1 -19  -1    6.33    1.24
  -1 -19   1    5.77    1.03
   1 -19  -1    4.62    0.86
  -1 -19   1    6.58    1.48
   1 -19   0    2.80    0.80
   1 -19   0    3.46    0.83
  -1 -19   0    3.24    0.78
  -1 -19   0    2.71    0.96
  -1 -19  -1   18.34    1.70
   1 -19   1   20.23    1.92
  -1 -19  -1   17.18    2.17
   1 -19   1   19.33    2.25
   1 -19   2    8.11    1.58
   1 -19   2    8.19    1.25
  -1 -19  -2    7.72    1.06
  -1 -19  -2    6.97    1.32
   1 -19   3   78.12    3.91
   1 -19   3   76.79    4.72
  -1 -19  -3   67.19    3.90
  -1 -19  -4   55.93    3.44
   1 -19   4   65.14    4.45
   1 -19   4   60.56    3.51
  -1 -19  -5   10.07    1.46
   1 -19   5   12.30    2.01
   1 -19   5   12.75    1.70
  -1 -19  -6   11.06    1.46
   1 -19   6   12.60    1.74
   1 -19   6   13.57    2.19
   1 -19   7   77.91    4.94
  -1 -19  -7   69.79    3.47
   1 -19   7   78.79    4.20
  -1 -19  -8   18.60    1.72
   1 -19   8   21.92    2.59
   1  19   8   16.05    1.68
   1 -19   8   19.83    2.14
   1 -19   9    5.63    1.45
   1 -19   9    5.16    1.18
   1  19   9    3.98    0.84
   1 -19  10   12.69    1.80
   1 -19  10   13.34    2.01
   1  19  10   11.31    1.36
   1 -19  11    0.16    0.50
   1  19  11    0.33    0.34
   1 -19  11   -0.53    0.93
   1  19  12    3.07    0.79
   1 -19  12    2.85    1.09
   1 -19  12    3.13    1.06
   1 -19  13   98.76    5.30
   1 -19  13   93.37    4.82
   1  19  13   85.73    3.72
   1 -19  14    1.00    0.74
   1  19  14    0.48    0.43
   1 -19  14    1.17    0.70
   1  19  15   20.15    1.77
   1 -19  15   25.69    2.55
   1 -19  15   24.61    2.58
   1  19  16    4.61    0.86
   1 -19  16    4.47    1.17
   1 -19  16    6.07    1.28
   1 -19  17   66.52    3.98
   1 -19  17   59.39    3.85
   1  19  17   64.27    3.08
   1 -19  18    2.56    0.92
   1  19  18    2.07    0.59
   1  19  18    1.73    0.56
   1 -19  18    1.82    0.67
   1 -19  19    0.76    0.58
   1  19  19    1.66    0.66
   1 -19  19    1.05    0.67
   1  19  19    0.82    0.51
   1 -19  20  164.96    5.75
   1 -19  20  172.92    5.99
   1  19  20  164.55    4.73
   1  19  21    7.50    1.06
   1 -19  21    6.56    1.24
   1 -19  21    6.10    1.15
   1  19  21    5.33    0.93
   1  19  22    4.96    0.88
   1  19  22    5.43    0.81
   1 -19  22    5.94    1.03
   1 -19  22    5.91    1.11
   1 -19  23   13.81    1.58
   1 -19  23   12.28    1.36
   1  19  23   11.76    1.24
   1  19  23    9.36    1.19
   1 -19  24  125.05    4.48
   1  19  24  120.03    3.70
   1 -19  24  116.34    3.88
   1  19  25   39.41    2.05
   1 -19  25   37.76    2.35
   1 -19  25   32.22    1.90
   1  19  25   28.06    1.79
   1 -19  26    3.30    0.70
   1  19  26    1.63    0.31
   1  19  26    2.94    0.52
   1 -19  26    3.37    0.56
   1  19  27   40.36    1.92
   1 -19  27   43.66    2.21
   1  19  28   36.75    1.74
   1 -19  28   39.82    1.93
   1  19  29    8.72    0.81
   1  19  30    1.89    0.38
  -1 -21  21    2.33    0.49
  -1 -21  20    3.99    0.72
  -1 -21  20    4.56    0.66
  -1 -21  19    4.08    0.69
  -1 -21  19    3.45    0.62
  -1 -21  18    1.03    0.49
  -1 -21  18    0.50    0.35
  -1 -21  17   21.23    1.73
  -1 -21  17   18.45    1.57
  -1 -21  16   -0.12    0.28
  -1 -21  16    0.24    0.26
  -1 -21  15   13.82    1.47
  -1 -21  15   13.70    1.39
  -1 -21  14    0.24    0.25
  -1 -21  14    0.57    0.44
  -1 -21  13   41.82    2.50
  -1 -21  13   39.71    2.62
  -1 -21  12    0.50    0.47
  -1 -21  12   -0.02    0.39
  -1 -21  11    1.03    0.50
  -1 -21  11    1.47    0.52
  -1 -21  10    1.48    0.62
  -1 -21  10    2.60    0.68
  -1 -21   9    1.10    0.43
  -1 -21   9    1.57    0.58
  -1 -21   8    2.84    0.70
  -1 -21   8    0.57    0.50
  -1 -21   7  142.44    4.40
  -1 -21   7  140.55    5.25
  -1 -21   6    1.09    0.69
  -1 -21   6    0.49    0.36
  -1 -21   5   44.87    2.97
   1 -21  -5   39.10    1.92
  -1 -21   5   45.84    2.38
  -1 -21   4    1.12    0.70
   1 -21  -4    1.11    0.44
  -1 -21   4    1.08    0.38
  -1 -21   3   65.67    3.45
   1 -21  -3   57.93    2.63
  -1 -21   3   68.13    2.77
  -1 -21   2   11.50    1.09
   1 -21  -2    9.70    1.13
  -1 -21   2   11.20    1.41
   1 -21  -1    0.31    0.32
  -1 -21   1    0.92    0.41
  -1 -21   1    1.20    0.41
   1 -21   0    1.67    0.57
  -1 -21   0    1.99    0.64
   1 -21   0    2.00    0.52
  -1 -21  -1    4.48    0.83
   1 -21   1    4.15    0.69
   1 -21   1    3.71    0.74
  -1 -21  -2    3.75    0.76
   1 -21   2    3.85    0.69
   1 -21   2    3.82    0.90
   1 -21   3   39.50    2.62
  -1 -21  -3   36.02    2.15
   1 -21   3   43.12    2.30
   1 -21   4    1.15    0.44
  -1 -21  -4    0.88    0.38
   1 -21   4    1.60    0.63
  -1 -21  -5   41.15    2.04
   1 -21   5   51.10    2.62
   1 -21   5   47.92    3.00
   1 -21   6   11.02    1.25
   1 -21   6   11.01    1.47
   1 -21   7   90.12    3.58
   1 -21   7   86.94    4.03
   1 -21   8    1.05    0.64
   1 -21   8    0.90    0.52
   1 -21   9    7.63    1.17
   1 -21   9    8.73    1.11
   1 -21  10    0.87    0.33
   1 -21  10    0.65    0.56
   1  21  11    1.48    0.32
   1 -21  11    2.67    0.72
   1 -21  11    2.01    0.62
   1 -21  12   11.79    1.41
   1 -21  12    8.90    1.24
   1  21  12    8.76    0.86
   1 -21  13   81.46    3.69
   1 -21  13   92.09    3.73
   1 -21  14    0.26    0.29
   1  21  14    0.49    0.19
   1 -21  14    0.82    0.48
   1 -21  15    5.69    0.88
   1 -21  15    5.86    0.99
   1  21  15    4.63    0.61
   1 -21  16    5.70    0.91
   1 -21  16    6.81    1.00
   1  21  16    3.93    0.53
   1  21  17   21.36    1.20
   1 -21  17   23.62    1.77
   1 -21  18    2.69    0.59
   1 -21  18    2.25    0.56
   1 -21  19    8.52    1.04
   1 -21  19    7.05    0.89
   1 -21  20    2.12    0.58
   1 -21  20    1.45    0.45
   1 -21  21    7.83    0.85
  -2   0  55    0.24    0.22
  -2   0  54    3.87    0.64
  -2   0  53    0.10    0.23
  -2   0  52  128.18    4.04
  -2   0  51   -0.03    0.29
  -2   0  50   13.18    1.48
  -2   0  49   -0.07    0.42
  -2   0  49    0.29    0.29
  -2   0  48  104.01    4.50
  -2   0  48  100.63    3.53
  -2   0  47    0.50    0.37
  -2   0  47    0.69    0.50
  -2   0  47    0.53    0.39
  -2   0  46    1.58    0.59
  -2   0  46    1.90    0.62
  -2   0  46    1.65    0.57
  -2   0  46    1.50    0.49
  -2   0  45    0.29    0.48
  -2   0  45    0.51    0.58
  -2   0  45    0.87    0.62
  -2   0  45    0.13    0.33
  -2   0  44    9.87    1.62
  -2   0  44   15.44    1.62
  -2   0  44   13.08    1.63
  -2   0  44   12.04    1.80
  -2   0  43    1.02    0.50
  -2   0  43    0.15    0.40
  -2   0  43   -0.03    0.36
  -2   0  43    0.52    0.63
  -2   0  42   39.31    2.90
  -2   0  42   38.14    3.20
  -2   0  42   39.39    2.75
  -2   0  42   37.46    3.21
  -2   0  41    1.60    0.71
  -2   0  41    1.45    0.88
  -2   0  41    0.90    0.70
  -2   0  41    0.61    0.57
  -2   0  40  376.66    8.63
  -2   0  40  352.97    9.66
  -2   0  40  352.47    8.92
  -2   0  40  341.76    9.90
  -2   0  39    1.30    0.98
  -2   0  39    0.83    0.49
  -2   0  39    0.01    0.64
  -2   0  39    0.69    0.63
   2   0 -38  109.34    9.07
  -2   0  38  123.56    5.01
  -2   0  38  117.50    5.21
   2   0 -38   99.35    7.69
  -2   0  38  115.22    5.53
  -2   0  38  107.23    5.69
   2   0 -37    0.08    0.69
  -2   0  37    0.22    0.61
   2   0 -37   -0.11    0.71
  -2   0  37    0.46    0.73
  -2   0  37   -1.59    1.86
  -2   0  37    0.38    0.53
  -2   0  37   -0.02    0.42
  -2   0  36    2.64    1.61
  -2   0  36    2.46    1.02
  -2   0  36    1.08    0.65
   2   0 -36    4.17    1.72
   2   0 -36    2.50    1.11
  -2   0  36    3.06    1.02
  -2   0  36    1.88    0.85
  -2   0  35   -0.23    0.66
  -2   0  35    0.36    0.44
  -2   0  35   -0.04    0.55
   2   0 -35    0.23    0.60
  -2   0  35    0.69    1.39
   2   0 -35    0.49    0.70
  -2   0  35    0.41    0.42
  -2   0  34    4.75    1.70
  -2   0  34    3.06    1.86
  -2   0  34    4.10    0.96
  -2   0  34    3.78    1.05
  -2   0  34    2.98    0.98
   2   0 -34    3.73    1.47
   2   0 -34    3.23    1.47
  -2   0  34    2.88    0.87
  -2   0  33    2.90    0.98
   2   0 -33    0.14    0.34
  -2   0  33    0.78    0.59
   2   0 -33    0.72    0.60
  -2   0  33    1.74    1.32
  -2   0  33    0.19    0.91
  -2   0  33    1.00    0.62
  -2   0  33    1.47    0.77
  -2   0  32 1271.53   17.45
   2   0 -32 1138.73   23.61
   2   0 -32 1223.29   27.79
  -2   0  32 1356.37   31.16
  -2   0  31    1.55    0.99
   2   0 -31    0.66    0.90
   2   0 -31    0.90    1.06
  -2   0  31    1.41    1.32
   2   0 -30   35.76    4.54
  -2   0  30   59.28    6.26
   2   0 -30   35.09    4.06
  -2   0  30   59.54    7.17
  -2   0  29    0.10    0.60
   2   0 -29    0.40    0.73
  -2   0  29    1.07    1.31
   2   0 -29    0.16    0.30
  -2   0  28  260.05   12.76
   2   0 -28  281.54   10.85
  -2   0  28  308.69   15.54
   2   0 -28  294.70   12.63
  -2   0  27    0.73    1.07
   2   0 -27    0.15    0.46
   2   0 -27    1.25    0.89
  -2   0  27    0.43    0.76
  -2   0  26    6.14    2.06
   2   0 -26    4.37    1.26
   2   0 -26    3.34    1.39
  -2   0  26    6.14    2.24
  -2   0  25    0.05    0.69
   2   0 -25   -0.10    0.64
   2   0 -25    0.04    0.53
   2   0 -24  445.65   14.30
  -2   0  24  351.03   10.31
  -2   0  24  389.86   14.75
   2   0 -24  422.62   12.21
  -2   0  24  488.56   17.88
  -2   0  23   -0.04    0.47
   2   0 -23    0.41    0.58
  -2   0  23    0.72    0.46
  -2   0  23    1.72    0.94
   2   0 -23   -0.17    0.68
   2   0 -22  354.63   10.74
   2   0 -22  340.76   12.08
  -2   0  21    0.21    0.58
   2   0 -21    0.72    0.65
  -2   0  21    0.09    0.47
   2   0 -21    0.93    0.71
   2   0 -20  556.58   12.97
   2   0 -20  548.21   14.83
  -2   0  19    1.14    0.67
   2   0 -19    0.57    0.68
  -2   0  19    0.51    0.59
   2   0 -18   28.04    2.79
  -2   0  18   24.42    2.19
   2   0 -18   25.30    3.12
  -2   0  18   19.23    2.40
   2   0 -17    0.55    0.58
  -2   0  17    0.16    0.32
   2   0 -17    0.55    0.73
  -2   0  17    0.52    0.43
   2   0 -16 1040.96   18.37
   2   0 -16 1017.84   15.93
  -2   0  15    1.45    0.74
  -2   0  15   -0.04    0.42
   2   0 -15    2.60    1.29
   2   0 -15    2.10    1.02
   2   0 -14 3396.20   27.58
   2   0 -14 3199.43   30.53
   2   0 -13    0.47    0.62
  -2   0  13   -0.02    0.43
  -2   0  13    0.63    0.46
   2   0 -13    1.29    0.98
  -2   0  12  259.92    7.66
  -2   0  12  244.28    5.63
   2   0 -11    0.66    0.25
  -2   0  11    0.37    0.38
  -2   0  11    0.20    0.15
  -2   0  10  566.10   10.85
  -2   0  10  531.39    7.55
   2   0  -9    0.73    0.29
  -2   0   9    0.73    0.51
   2   0  -9    0.03    0.24
   2   0  -8  224.11    5.48
   2   0  -8  237.09    4.38
   2   0  -7    0.11    0.13
   2   0  -7    0.35    0.18
  -2   0   7    0.48    0.42
  -2   0   6  879.08   11.99
   2   0  -6  901.65    9.78
  -2   0   5    0.53    0.41
   2   0  -5    0.49    0.20
   2   0  -5    0.10    0.09
   2   0  -4  989.25    8.91
   2   0  -4  840.89    7.58
   2   0  -3    0.25    0.12
   2   0  -3    0.10    0.16
   2   0  -3    0.27    0.11
   2   0  -2    5.80    0.66
   2   0  -2    5.91    0.63
   2   0  -2    6.95    0.71
   2   0  -1    0.16    0.09
   2   0  -1    0.35    0.19
  -2   0   1    0.55    0.36
  -2   0   0 9820.87   29.58
   2   0   0 9717.64   16.93
   2   0   1    0.20    0.10
  -2   0  -1    0.24    0.22
   2   0   1    0.26    0.10
   2   0   1    0.25    0.21
   2   0   1    0.75    0.28
   2   0   2  880.14    8.70
  -2   0  -2  849.47    7.18
   2   0   3    0.66    0.29
   2   0   3    0.21    0.27
  -2   0  -3    0.26    0.12
   2   0   3    0.48    0.20
   2   0   3    0.31    0.15
   2   0   4  156.99    3.27
  -2   0  -4  153.15    2.31
  -2   0  -4  157.03    4.05
   2   0   5    0.35    0.23
   2   0   5    0.98    0.44
  -2   0  -5    0.27    0.29
   2   0   6  129.66    4.94
  -2   0  -6  118.49    3.69
  -2   0  -7    0.74    0.36
   2   0   7    0.73    0.29
   2   0   7    1.28    0.64
   2   0   8    4.88    0.78
  -2   0  -8    7.39    1.02
   2   0   9    0.30    0.31
  -2   0  -9    0.13    0.18
   2   0  10  942.66   13.09
  -2   0 -10  936.82   11.66
  -2   0 -11    0.58    0.38
   2   0  11    0.51    0.30
   2   0  11    0.65    0.43
   2   0  12  639.09   11.48
   2   0  12  579.29    9.97
   2   0  13    0.58    0.21
  -2   0 -13    0.28    0.33
  -2   0 -13    0.38    0.44
   2   0  13    0.40    0.40
  -2   0 -14  170.70    5.61
   2   0  14  154.03    5.97
  -2   0 -14  167.07    6.29
   2   0  15    0.59    0.52
   2   0  15    1.43    0.81
  -2   0 -15    0.45    0.34
  -2   0 -15    0.39    0.31
  -2   0 -16 2205.53   20.94
  -2   0 -16 2185.37   23.89
   2   0  17    0.14    0.32
  -2   0 -17    0.17    0.39
  -2   0 -17    0.07    0.40
   2   0  18  111.25    5.79
  -2   0 -18   94.75    4.48
  -2   0 -18   93.48    5.28
   2   0  18  121.29    5.80
  -2   0 -19    0.16    0.35
   2   0  19    0.69    0.53
  -2   0 -19    0.14    0.43
   2   0  19   -0.21    0.54
   2   0  20  862.28   17.15
  -2   0 -20  857.23   18.16
  -2   0 -20  865.36   14.02
  -2   0 -20  883.91   16.52
   2   0  21    0.62    0.63
   2   0  21    1.77    1.45
  -2   0 -21    0.42    0.77
  -2   0 -21    0.72    0.60
   2   0  21    0.07    0.79
  -2   0 -21    0.78    0.58
  -2   0 -22  125.99    5.54
   2   0  22  117.15    6.77
  -2   0 -22  129.24    7.44
   2   0  22  137.14    6.55
  -2   0 -22  128.32    6.60
   2   0  22  137.10    9.85
   2   0  23    0.05    0.54
  -2   0 -23   -0.36    0.61
   2   0  23    0.54    0.46
   2   0  23    0.16    0.42
  -2   0 -23   -0.07    0.38
  -2   0 -23    0.58    0.40
   2   0  24  379.36   11.29
  -2   0 -24  305.50   10.56
   2   0  24  320.57   11.88
  -2   0 -24  303.95   11.81
  -2   0 -24  299.90    8.89
   2   0  24  377.17   17.17
  -2   0 -25   -0.02    0.40
  -2   0 -25    0.08    0.34
  -2   0 -25    0.19    0.28
   2   0  25    0.12    1.08
   2   0  25    0.63    0.66
   2   0  25    0.54    0.62
   2   0  26    0.53    0.42
  -2   0 -26    0.65    0.62
   2   0  26   -0.40    1.16
  -2   0 -26    1.83    0.90
  -2   0 -26    1.27    0.71
   2   0  26    0.93    0.81
   2   0  27   -0.43    1.20
   2   0  27    0.67    0.43
  -2   0 -27   -0.06    0.24
  -2   0 -27    0.05    0.31
   2   0  27   -0.52    0.72
  -2   0 -27    0.00    0.48
   2   0  28   58.82    4.77
  -2   0 -28   71.99    6.20
   2   0  28   58.31    7.33
  -2   0 -28   63.90    5.19
  -2   0 -29    0.17    0.44
  -2   0 -29    0.59    0.75
   2   0  29    1.25    0.83
   2   0  29    1.04    1.25
   2   0  30    5.63    1.92
  -2   0 -30    3.15    1.34
  -2   0 -30    2.86    1.53
   2   0  31   -0.20    1.12
  -2   0 -31    0.66    0.75
  -2   0 -31    0.86    0.85
  -2   0 -32  190.19    9.59
   2   0  32  212.40    6.53
   2   0  32  213.95    5.98
   2   0  32  213.58    5.95
  -2   0 -32  221.00   11.55
  -2   0 -33    0.58    0.95
   2   0  33    0.88    0.60
  -2   0 -33   -0.16    0.54
   2   0  33   -0.08    1.22
   2   0  33    0.48    0.50
   2   0  34    3.59    1.02
  -2   0 -34    3.25    1.41
  -2   0 -34    5.59    1.91
   2   0  34    0.95    1.11
   2   0  34    1.04    0.45
   2   0  35    0.07    0.46
  -2   0 -35    0.42    0.76
  -2   0 -35    0.33    0.52
   2   0  35    0.54    0.46
   2   0  35    0.09    0.78
  -2   0 -36    0.71    0.63
   2   0  36    1.26    0.50
   2   0  36    3.10    1.76
   2   0  36    2.44    0.88
  -2   0 -36   -0.36    0.74
  -2   0 -37   -0.50    0.63
  -2   0 -37   -1.25    0.70
   2   0  37    0.11    0.38
   2   0  37    0.87    0.80
   2   0  37    0.46    0.55
   2   0  38   16.68    1.76
  -2   0 -38   12.12    2.63
   2   0  38   16.21    2.00
   2   0  39    0.30    0.60
   2   0  39    0.42    0.51
   2   0  40    4.60    1.01
   2   0  40    4.77    1.08
   2   0  41   -0.04    0.42
   2   0  41    0.28    0.29
   2   0  42   20.93    1.99
   2   0  42   17.42    2.01
   2   0  43    0.87    0.54
   2   0  43   -0.15    0.53
   2   0  44    0.62    0.40
   2   0  44    1.61    0.78
   2   0  45    0.42    0.34
   2   0  45   -0.45    0.35
   2   0  46    0.29    0.29
   2   0  46   -0.23    0.50
   2   0  47    0.68    0.36
   2   0  47   -0.06    0.31
   2   0  48  207.51    6.04
   2   0  48  203.36    5.13
   2   0  49    1.00    0.42
   2   0  49    0.72    0.39
   2   0  50   13.77    1.21
   2   0  50   13.93    1.45
   2   0  51    0.64    0.34
   2   0  51    0.07    0.27
   2   0  52  147.51    3.21
   2   0  52  149.24    4.15
   2   0  53    0.22    0.26
   2   0  54    0.91    0.34
  -2   2  54    0.39    0.23
  -2  -2  54    0.04    0.18
  -2  -2  53    1.60    0.43
  -2   2  53    2.33    0.54
  -2   2  52   40.67    2.25
  -2  -2  52   39.00    1.72
  -2  -2  52   40.19    2.23
  -2   2  51   49.41    2.14
  -2   2  51   51.17    2.71
  -2  -2  51   51.37    2.68
  -2  -2  51   47.41    2.13
  -2   2  50   -0.14    0.32
  -2  -2  50    0.47    0.29
  -2  -2  50    0.11    0.33
  -2   2  50    0.49    0.38
  -2  -2  49    1.40    0.53
  -2  -2  49    2.02    0.56
  -2   2  49    1.70    0.52
  -2   2  49    1.78    0.59
  -2   2  49    1.38    0.43
  -2  -2  48   34.36    2.21
  -2   2  48   33.65    2.37
  -2   2  48   34.15    2.57
  -2   2  48   33.45    2.23
  -2  -2  48   35.68    2.62
  -2   2  47   41.93    2.61
  -2  -2  47   42.81    2.59
  -2  -2  47   40.79    2.93
  -2   2  47   43.90    2.98
  -2   2  47   39.49    2.73
  -2  -2  46   13.43    1.80
  -2   2  46   14.22    1.82
  -2   2  46   13.59    1.56
  -2   2  46   13.66    1.68
  -2  -2  46   12.62    1.47
  -2   2  45    2.91    0.81
  -2  -2  45    3.50    0.87
  -2  -2  45    3.94    1.03
  -2   2  45    3.00    0.90
  -2   2  45    3.87    0.95
  -2  -2  44    1.52    0.55
  -2   2  44    1.09    0.60
  -2   2  44    2.26    0.74
  -2  -2  44    2.53    0.67
  -2   2  44    2.30    0.81
  -2   2  43    0.95    0.64
  -2   2  43    0.72    0.45
  -2   2  43    0.59    0.58
  -2  -2  43    0.80    0.56
  -2  -2  43    0.43    0.38
  -2   2  42   25.38    2.58
  -2  -2  42   24.80    2.58
  -2   2  42   24.91    2.35
  -2   2  42   23.69    2.47
  -2  -2  42   23.97    2.22
  -2   2  41   63.63    3.74
  -2  -2  41   64.62    3.67
   2  -2 -41   59.99    3.30
  -2  -2  41   61.05    4.07
  -2   2  41   63.60    4.08
  -2   2  41   55.13    3.95
  -2   2  40  183.62    7.25
  -2  -2  40  194.66    6.45
  -2   2  40  194.16    6.65
  -2  -2  40  190.65    7.21
  -2   2  40  194.42    7.14
  -2  -2  39    4.59    1.03
   2  -2 -39    1.96    0.71
  -2   2  39    1.77    0.94
  -2  -2  39    4.48    1.13
  -2   2  39    2.89    0.99
  -2   2  39    3.07    0.91
   2  -2 -38    1.51    0.54
  -2  -2  38    1.78    0.73
  -2  -2  38   -0.02    1.21
   2  -2 -38    0.50    0.43
  -2   2  38    2.23    0.83
  -2   2  38    2.14    0.75
  -2   2  38   -0.15    1.13
   2   2 -38    0.90    1.37
   2  -2 -38    1.47    1.30
  -2   2  38    1.70    0.93
  -2  -2  38    1.26    0.79
  -2  -2  37   12.22    1.95
   2  -2 -37    7.93    2.43
  -2   2  37   19.74    4.39
   2  -2 -37    8.99    1.33
  -2   2  37   10.17    1.77
   2   2 -37    8.58    2.65
  -2  -2  37   14.02    1.80
   2  -2 -37    7.84    2.29
  -2  -2  37   17.10    4.50
  -2  -2  37   12.85    1.87
  -2   2  37   13.00    1.78
  -2   2  37   12.14    1.85
  -2  -2  37   15.44    3.79
  -2  -2  36  150.45   12.90
   2  -2 -36  150.97    5.33
  -2  -2  36  145.29   11.48
  -2   2  36  136.24    6.32
   2  -2 -36  122.06    8.66
  -2  -2  36  132.04    5.32
  -2   2  36  133.16    5.60
   2   2 -36  131.19    9.65
  -2   2  36  151.75   12.04
   2  -2 -36  124.86    9.41
  -2   2  36  134.12    5.84
  -2  -2  36  135.70    6.10
  -2  -2  36  133.58    6.36
  -2   2  35    3.01    1.73
  -2  -2  35    2.11    0.80
  -2  -2  35    3.43    1.98
  -2  -2  35    2.34    1.70
   2   2 -35    1.90    1.04
   2   2 -35    0.51    0.96
   2  -2 -35    0.58    0.42
  -2   2  35    1.57    0.69
  -2  -2  35    1.64    0.88
  -2   2  35    1.68    0.66
  -2  -2  35    1.54    0.50
   2  -2 -35    1.89    1.22
  -2   2  35    1.74    0.74
   2  -2 -35    1.69    1.23
   2  -2 -34    8.04    2.42
   2  -2 -34    8.56    1.28
  -2  -2  34   16.61    3.89
  -2  -2  34   12.02    1.67
  -2  -2  34   13.84    3.61
  -2   2  34   11.10    1.58
  -2   2  34    7.78    1.45
  -2   2  34   15.49    3.81
  -2  -2  34   12.08    1.91
   2   2 -34    8.43    2.02
  -2  -2  34   10.24    1.81
   2   2 -34    6.94    2.14
   2  -2 -34    7.22    2.03
  -2   2  34   10.59    1.70
  -2   2  33   33.81    2.82
  -2  -2  33   31.30    2.92
  -2  -2  33   34.00    3.22
  -2   2  33   42.23    6.12
  -2  -2  33   32.40    2.67
  -2   2  33   33.58    2.46
  -2   2  33   32.80    3.07
   2  -2 -33   34.78    2.50
  -2   2  33   32.03    2.93
  -2  -2  33   31.63    5.27
  -2  -2  33   35.17    6.03
   2   2 -33   29.14    3.65
   2  -2 -33   31.32    4.24
   2   2 -33   28.29    4.34
   2  -2 -33   30.00    4.45
  -2   2  32  345.94   17.11
   2  -2 -32  255.93   11.90
  -2  -2  32  273.53    7.46
  -2   2  32  275.85    8.82
  -2  -2  32  317.46   17.57
   2   2 -32  256.26   10.60
  -2   2  32  269.49    7.91
   2   2 -32  265.30   13.05
  -2   2  32  271.49    7.72
  -2  -2  32  301.96   15.89
  -2  -2  32  275.05    8.35
   2  -2 -32  266.13   12.93
  -2   2  31  298.08   13.29
   2  -2 -31  293.38   12.70
  -2  -2  31  340.43   17.88
   2   2 -31  285.67   10.97
   2  -2 -31  305.67   13.61
  -2   2  31  356.69   17.20
  -2  -2  31  288.98   15.29
   2   2 -31  313.90   13.81
   2   2 -30    1.91    1.03
  -2  -2  30    2.52    1.52
   2  -2 -30    1.45    1.00
   2   2 -30    1.51    0.88
  -2   2  30    3.29    1.20
   2  -2 -30    0.43    0.66
  -2  -2  30    4.75    2.04
  -2  -2  29  107.26    9.71
   2   2 -29  100.28    6.24
   2  -2 -29  102.31    7.21
  -2   2  29   90.09    7.09
   2  -2 -29  101.85    7.65
  -2  -2  29   85.81    8.07
   2   2 -29  106.29    7.81
  -2  -2  28  182.59   12.50
   2   2 -28  153.90    7.53
  -2   2  28  163.28    9.49
   2   2 -28  165.11    9.50
   2  -2 -28  151.23    8.73
   2  -2 -28  158.53    9.33
  -2  -2  28  155.26   10.63
   2   2 -27   79.79    5.32
  -2  -2  27   60.97    6.62
  -2   2  27   63.72    5.84
  -2  -2  27   68.24    5.30
   2  -2 -27   81.07    6.18
   2   2 -27   86.80    6.75
   2  -2 -27   81.01    6.61
  -2  -2  27   73.12    7.72
  -2  -2  26  225.12   12.33
   2  -2 -26  181.77    9.63
   2   2 -26  181.58    7.77
  -2  -2  26  232.98    9.63
   2   2 -26  190.45    9.80
  -2  -2  26  255.37   14.14
   2  -2 -26  175.38    9.03
   2  -2 -25   73.74    6.02
  -2  -2  25  107.12    8.97
  -2  -2  25  100.63    6.23
  -2  -2  25   96.73    8.00
   2   2 -25   78.43    5.03
   2   2 -25   74.84    6.11
   2  -2 -25   77.06    5.93
  -2  -2  24  316.70   14.07
   2   2 -24  337.77   10.13
   2  -2 -24  327.89   11.92
  -2   2  24  303.08   10.06
   2   2 -24  358.12   12.85
  -2  -2  24  378.27   16.40
  -2  -2  24  336.62   11.24
   2  -2 -24  341.26   12.74
  -2   2  23  424.63   11.86
   2   2 -23  408.94   10.92
  -2  -2  23  516.18   18.68
   2  -2 -23  378.88   12.70
  -2  -2  23  471.18   13.07
  -2  -2  23  439.92   16.34
   2   2 -23  409.67   13.45
   2  -2 -23  397.02   13.49
  -2  -2  22    2.61    1.52
  -2   2  22    2.31    0.97
  -2  -2  22    6.23    1.46
   2   2 -22    3.20    1.17
   2  -2 -22    2.83    1.26
  -2  -2  22    2.83    1.61
   2  -2 -22    2.05    1.19
   2   2 -22    2.89    0.97
  -2  -2  21   19.43    3.40
  -2  -2  21   26.08    3.97
  -2  -2  21   22.66    2.81
   2   2 -21   28.08    3.41
   2  -2 -21   28.10    3.39
   2   2 -21   29.78    2.86
   2  -2 -21   28.96    3.55
  -2   2  21   21.35    2.59
   2   2 -20  591.88   15.19
   2  -2 -20  568.35   15.19
   2  -2 -20  564.93   14.86
  -2  -2  20  488.82   12.66
  -2  -2  20  544.37   17.72
   2   2 -20  586.46   12.19
  -2  -2  20  456.69   15.72
  -2   2  20  458.40   12.00
   2   2 -19  211.99    7.16
   2   2 -19  214.17    9.04
  -2  -2  19  154.80    7.04
  -2  -2  19  179.87    9.80
  -2   2  19  154.17    6.95
  -2  -2  19  145.89    8.71
   2  -2 -19  211.23    8.97
   2  -2 -19  205.42    9.08
  -2  -2  18  130.10    8.08
  -2  -2  18  145.90    8.74
   2  -2 -18  115.25    6.52
  -2  -2  18  134.84    6.42
  -2   2  18  134.76    6.38
   2   2 -18  117.22    5.22
   2   2 -18  114.52    6.39
   2  -2 -18  111.06    6.49
  -2   2  17    9.52    1.71
   2   2 -17   14.46    1.82
   2  -2 -17   13.69    2.24
  -2  -2  17    8.36    2.11
  -2  -2  17   10.50    2.34
   2  -2 -17   13.84    2.27
   2   2 -17   13.56    2.23
  -2  -2  17    9.75    1.73
  -2   2  17    7.59    0.83
   2  -2 -16   88.55    5.38
   2  -2 -16   81.42    5.25
   2   2 -16   86.59    5.31
  -2   2  16   85.98    4.96
  -2  -2  16   82.43    4.79
   2   2 -16   92.50    4.37
  -2  -2  16   97.76    6.55
  -2  -2  15  600.45   12.60
  -2   2  15  621.90   13.13
   2   2 -15  513.68   12.40
   2   2 -15  551.63   10.35
  -2  -2  15  700.27   16.54
   2  -2 -15  549.88   13.08
   2  -2 -15  497.74   12.74
   2  -2 -14    7.33    1.47
   2   2 -14    7.46    1.21
  -2   2  14    3.67    0.94
   2   2 -14    8.53    1.61
  -2  -2  14    3.02    1.12
   2  -2 -14    7.46    1.51
  -2  -2  14    2.98    0.98
  -2   2  13   26.92    2.65
   2  -2 -13   19.30    2.41
  -2  -2  13   26.07    2.47
   2   2 -13   17.73    2.21
   2   2 -13   18.65    1.79
   2  -2 -13   17.22    2.21
  -2  -2  13   29.39    3.08
   2   2 -12   29.69    2.15
   2  -2 -12   23.41    2.52
  -2  -2  12   42.72    3.51
  -2  -2  12   37.25    2.86
  -2   2  12   38.61    3.12
   2   2 -12   27.35    2.62
   2  -2 -12   25.85    2.67
  -2   2  11   39.47    3.07
  -2  -2  11   37.19    3.13
   2  -2 -11   33.03    2.89
  -2  -2  11   32.88    2.62
   2   2 -11   33.37    2.19
   2   2 -11   31.82    2.70
   2  -2 -11   31.00    2.80
   2  -2 -10  140.24    5.77
  -2  -2  10  179.59    5.17
  -2   2  10  182.19    6.39
   2  -2 -10  126.06    5.40
  -2  -2  10  196.43    6.64
   2   2 -10  143.27    4.24
   2   2 -10  133.37    5.27
  -2  -2  10  167.02    5.72
  -2  -2   9   35.36    2.65
  -2  -2   9   29.73    2.35
   2   2  -9   21.79    1.57
   2  -2  -9   16.62    1.91
  -2  -2   9   32.20    2.03
   2   2  -9   34.06    1.14
  -2   2   9   32.25    2.63
   2   2  -9   18.96    1.90
  -2   2   8   49.35    3.16
   2  -2  -8   46.64    2.58
   2   2  -8   88.47    3.89
   2  -2  -8   86.04    4.03
  -2  -2   8   50.37    2.91
   2   2  -8   83.24    2.76
  -2  -2   8   41.99    2.22
   2   2  -8   48.44    1.39
  -2  -2   8   44.19    2.77
   2  -2  -7  151.72    5.06
  -2  -2   7  123.37    4.14
  -2  -2   7  113.59    3.25
   2   2  -7  168.43    5.06
   2   2  -7  113.21    2.20
   2  -2  -7  113.00    3.85
   2   2  -7  157.74    3.44
  -2   2   7  116.48    4.69
  -2  -2   6    3.24    0.64
   2  -2  -6    1.47    0.45
   2   2  -6    2.49    0.35
   2  -2  -6    1.27    0.52
   2  -2  -6    1.88    0.57
  -2  -2   6    2.80    0.49
   2   2  -6    1.31    0.43
  -2   2   6    1.53    0.51
   2   2  -6    1.20    0.28
   2   2  -5  204.60    6.20
  -2  -2   5  278.41    5.29
  -2  -2   5  276.71    4.26
   2   2  -5  289.30    3.92
   2   2  -5  215.42    5.11
   2  -2  -5  215.06    5.42
  -2   2   5  273.35    6.76
   2  -2  -5  284.82    5.78
   2  -2  -4  439.81    7.43
   2  -2  -4  448.52    7.10
   2   2  -4  451.28    5.12
   2   2  -4  436.58    6.94
   2  -2  -4  423.33    3.88
  -2  -2   4  437.33    6.16
  -2  -2   4  440.17    4.98
   2  -2  -3   29.99    1.83
  -2  -2   3   53.21    2.00
   2   2  -3   70.10    2.68
   2  -2  -3   33.70    1.35
  -2  -2   3   30.46    1.25
  -2  -2   3   33.58    1.63
   2  -2  -3   70.07    2.83
   2  -2  -2    6.22    0.68
   2   2  -2   10.60    1.02
   2  -2  -2    6.86    0.88
   2  -2  -2   10.56    1.05
  -2  -2   2    7.30    0.75
  -2  -2   2    8.64    0.90
  -2  -2   2    6.62    0.56
  -2   2   1  217.93    5.47
   2  -2  -1  209.42    4.22
   2  -2  -1  252.09    5.00
  -2  -2   1  232.77    4.93
   2   2  -1  247.82    4.72
   2  -2  -1  205.01    4.68
   2   2   0  851.51    8.60
   2  -2   0  809.63    8.93
  -2  -2   0  805.47    6.34
  -2   2   0  778.74    9.89
   2  -2   0  757.79    8.67
   2  -2   0  754.47    8.29
   2  -2   0  741.29    8.78
  -2  -2   0  787.19    9.64
   2  -2   0  846.50    8.97
   2  -2   1    1.87    0.49
  -2  -2  -1    6.65    0.96
   2  -2   1    2.97    0.56
   2  -2   1    2.15    0.57
  -2   2  -1    2.44    0.63
   2  -2   1    2.09    0.48
  -2  -2  -1    6.57    0.70
   2  -2   2    1.02    0.36
   2  -2   2    1.23    0.49
  -2   2  -2    1.29    0.46
   2  -2   2    1.20    0.39
  -2  -2  -2    2.06    0.46
  -2  -2  -2    2.62    0.65
   2  -2   2    1.18    0.36
  -2   2  -3    5.08    0.76
  -2  -2  -3    3.78    0.77
  -2  -2  -3    2.16    0.53
   2  -2   3    4.48    0.79
   2  -2   3    4.39    0.71
   2  -2   3    4.29    0.68
   2  -2   3    5.75    0.95
   2  -2   3    5.08    0.72
   2  -2   4   21.95    1.74
   2  -2   4   21.22    1.54
   2  -2   4   21.22    1.48
  -2  -2  -4   27.42    1.88
  -2   2  -4   23.32    1.55
   2  -2   4   22.80    1.72
   2  -2   5    3.07    0.74
  -2   2  -5    2.62    0.56
   2  -2   5    3.58    0.73
  -2  -2  -5    2.42    0.67
   2  -2   5    3.26    0.76
   2  -2   5    3.05    0.58
   2  -2   6  161.86    4.65
   2  -2   6  168.54    4.31
   2  -2   6  160.47    5.06
  -2   2  -6  163.38    3.80
   2  -2   6  162.92    5.14
  -2   2  -7   69.98    2.39
   2  -2   7   67.91    3.40
   2  -2   7   66.79    3.54
  -2   2  -7   56.00    2.63
   2  -2   7   71.70    2.87
  -2  -2  -7   59.95    3.26
   2  -2   8  798.40   12.96
   2  -2   8  794.04    9.90
  -2   2  -8  812.72   10.04
  -2  -2  -8  786.60   12.23
  -2   2  -8  784.91    7.70
   2  -2   9  118.72    5.35
  -2   2  -9  120.61    2.92
   2  -2   9  123.38    4.03
   2   2   9  101.34    2.18
  -2   2  -9   74.43    3.09
   2  -2   9  114.55    4.70
  -2  -2  -9   84.28    4.14
  -2  -2  -9   86.77    4.18
  -2   2 -10  358.07    4.75
   2  -2  10  368.31    9.43
   2   2  10  321.31    4.52
   2  -2  10  352.32    8.59
  -2  -2 -10  251.53    7.35
   2  -2  10  375.73    7.27
   2  -2  10  366.30   10.01
  -2  -2 -11   16.21    1.85
  -2   2 -11   17.43    1.54
   2  -2  11    9.66    1.48
   2   2  11   10.09    0.97
  -2  -2 -11   17.76    2.02
   2  -2  11    9.29    1.18
   2  -2  11   10.50    1.67
   2   2  11   20.25    2.47
  -2   2 -11   10.38    0.77
   2  -2  11   10.09    1.87
   2   2  11   10.12    0.91
   2  -2  11    8.41    1.36
  -2   2 -12  507.02    4.72
   2  -2  12  509.01    9.09
   2  -2  12  533.30   11.84
   2  -2  12  491.22   11.11
   2   2  12  452.26    6.74
   2   2  12  494.44    6.93
   2  -2  12  538.46   13.62
  -2  -2 -12  531.94   10.76
   2  -2  12  525.08   11.14
  -2  -2 -12  540.53   11.45
  -2   2 -12  535.59    8.67
  -2   2 -12  509.81    9.71
   2   2  12  550.40   13.14
   2  -2  13  446.93    8.88
   2  -2  13  434.92   10.98
   2   2  13  401.96    6.94
   2  -2  13  464.40   10.96
  -2   2 -13  466.03    9.67
  -2  -2 -13  467.31   10.17
   2   2  13  434.48    6.67
   2  -2  13  469.50   11.36
   2   2  13  491.41   13.02
   2  -2  13  460.75   13.24
  -2  -2 -13  477.52   11.08
  -2   2 -13  480.95    8.29
  -2  -2 -14  153.51    5.96
   2  -2  14  115.78    4.67
   2   2  14  115.34    3.53
   2  -2  14  114.20    5.84
   2   2  14  105.12    3.80
   2  -2  14  127.11    6.05
  -2  -2 -14  147.11    6.32
   2  -2  14  128.79    7.35
  -2   2 -14  151.18    4.75
  -2   2 -14  146.71    5.60
   2  -2  15  631.73   13.73
   2  -2  15  567.51   13.54
   2  -2  15  595.59   11.01
   2   2  15  578.35    8.15
  -2  -2 -15  548.74   11.42
   2   2  15  612.34   11.15
  -2  -2 -15  548.12   12.43
  -2   2 -15  528.95   11.05
   2  -2  15  616.19   16.90
   2   2  15  532.86    9.08
  -2   2 -15  540.19    9.21
   2  -2  16  125.97    6.25
   2  -2  16  126.38    8.04
  -2   2 -16  174.20    6.54
  -2  -2 -16  183.92    6.74
   2  -2  16  116.67    5.00
   2   2  16  118.75    5.11
  -2  -2 -16  180.46    7.29
   2   2  16  105.32    4.29
   2   2  16  115.92    3.71
   2  -2  16  116.79    6.36
  -2   2 -16  183.43    5.48
   2   2  17   27.18    2.31
  -2   2 -17   45.66    3.48
  -2   2 -17   47.39    2.86
  -2  -2 -17   46.59    3.45
   2  -2  17   28.72    2.58
   2  -2  17   30.12    3.12
   2   2  17   32.20    2.70
  -2  -2 -17   46.27    3.73
   2  -2  17   28.68    3.29
   2   2  17   28.39    1.82
   2  -2  17   32.44    4.27
  -2  -2 -18    1.55    0.81
  -2   2 -18    2.01    0.88
  -2  -2 -18    1.45    0.78
   2   2  18    3.75    0.88
   2  -2  18    3.18    1.38
   2  -2  18    3.31    0.91
   2  -2  18    2.52    0.85
  -2   2 -18    1.85    0.60
   2  -2  18    4.08    1.30
   2   2  18    3.20    0.92
   2  -2  19   47.17    5.43
   2  -2  19   48.11    4.09
   2  -2  19   45.61    3.37
   2  -2  19   44.15    4.37
  -2  -2 -19   55.53    3.89
  -2  -2 -19   54.66    4.52
  -2   2 -19   52.37    3.18
  -2   2 -19   50.27    3.89
  -2  -2 -19   59.74    4.40
   2   2  19   43.32    3.18
   2   2  19   50.92    3.54
  -2  -2 -20   43.96    4.15
   2  -2  20   44.13    5.40
   2   2  20   36.40    3.00
   2   2  20   45.89    3.42
  -2   2 -20   49.22    3.10
  -2   2 -20   48.69    4.39
  -2  -2 -20   49.94    4.14
  -2  -2 -20   49.19    3.72
   2  -2  20   44.46    3.40
   2  -2  20   49.01    4.21
   2  -2  20   44.45    4.45
  -2   2 -20   46.35    3.81
  -2  -2 -21   49.84    3.83
  -2   2 -21   52.69    4.75
  -2   2 -21   49.02    4.02
   2  -2  21   61.28    5.46
   2  -2  21   64.21    4.88
  -2   2 -21   50.74    3.20
  -2  -2 -21   48.19    4.45
   2  -2  21   60.91    6.63
   2  -2  21   60.23    4.02
   2   2  21   50.14    3.69
  -2  -2 -21   52.26    4.35
   2   2  21   64.92    4.11
  -2  -2 -22    1.31    0.81
  -2   2 -22    1.11    0.96
  -2  -2 -22    1.04    0.69
  -2   2 -22    1.53    0.54
   2   2  22    1.58    0.69
   2  -2  22    0.94    0.95
   2   2  22    1.72    0.71
   2  -2  22    2.24    1.13
   2  -2  22    2.13    1.08
  -2   2 -22    0.85    0.37
  -2  -2 -22    0.75    0.55
  -2   2 -23   51.96    4.26
  -2   2 -23   51.88    4.83
  -2  -2 -23   49.13    4.62
  -2  -2 -23   48.52    3.86
  -2  -2 -23   53.40    4.50
   2   2  23   63.64    4.20
   2  -2  23   58.41    6.79
   2  -2  23   54.05    5.38
  -2   2 -23   52.31    3.35
   2  -2  23   63.24    5.07
  -2  -2 -24   52.60    4.07
   2  -2  24   61.39    5.03
  -2  -2 -24   57.40    5.11
  -2   2 -24   57.17    3.54
   2  -2  24   56.88    5.73
  -2  -2 -24   54.70    4.68
  -2   2 -24   54.02    4.44
   2  -2  24   55.05    6.77
   2   2  24   60.01    4.12
  -2   2 -24   62.07    5.42
  -2   2 -25   17.39    2.97
   2   2  25   23.84    2.65
  -2  -2 -25   14.29    2.52
   2  -2  25   21.59    4.44
  -2  -2 -25   13.35    2.48
   2  -2  25   23.76    3.19
  -2   2 -25   16.44    2.47
   2  -2  25   18.99    3.28
  -2  -2 -25   12.46    1.99
  -2  -2 -26    8.98    2.01
  -2  -2 -26    8.91    1.78
  -2   2 -26    9.32    2.22
   2  -2  26    9.95    3.01
   2  -2  26    9.81    2.12
  -2   2 -26   10.13    2.02
  -2  -2 -26    9.96    2.21
   2   2  26   10.37    1.75
   2  -2  26    9.18    2.42
  -2  -2 -27  108.77    7.42
   2  -2  27   83.61    7.40
   2  -2  27  103.37    9.94
   2  -2  27  104.89    6.90
  -2   2 -27  103.08    6.44
  -2  -2 -27  102.62    5.88
  -2  -2 -27  106.22    6.80
  -2   2 -27  119.68    7.94
  -2  -2 -28  132.23    7.79
  -2  -2 -28  137.33    6.87
   2  -2  28  105.50   10.24
   2  -2  28  100.88    6.87
  -2   2 -28  136.48    7.59
   2  -2  28   94.97    7.95
  -2   2 -28  155.79    9.24
  -2  -2 -28  143.53    8.69
  -2   2 -29  258.24   10.57
  -2  -2 -29  257.75   11.87
  -2   2 -29  276.99   12.49
   2  -2  29  256.46   11.09
   2  -2  29  247.27   16.07
   2  -2  29  225.14   12.62
   2   2  29  278.53   15.96
  -2  -2 -29  248.73    9.39
  -2  -2 -29  256.62   10.89
  -2   2 -30   16.50    3.10
  -2   2 -30   14.27    2.58
   2  -2  30   21.78    3.26
   2  -2  30   20.76    3.81
   2  -2  30   20.19    4.69
  -2  -2 -30   13.44    2.24
  -2  -2 -30   13.18    2.55
   2   2  30   23.49    4.88
  -2  -2 -30   14.81    2.95
   2  -2  31  283.63    7.20
  -2   2 -31  275.27   12.87
   2   2  31  332.09   17.99
   2  -2  31  323.26   18.98
   2  -2  31  322.08   12.77
  -2  -2 -31  241.58   10.87
   2  -2  31  296.73   15.08
   2  -2  31  271.70    6.62
   2  -2  31  267.55    7.47
  -2   2 -31  257.06   10.88
   2   2  31  285.48    7.54
  -2  -2 -31  270.48   12.55
   2  -2  32  123.78   11.88
   2   2  32  113.26    4.21
   2   2  32  120.18    4.95
  -2  -2 -32  123.83    8.68
   2  -2  32  117.17    5.00
   2  -2  32  115.25    4.40
   2  -2  32  115.63    4.63
  -2   2 -32  126.93    8.91
   2   2  32  135.18   11.67
  -2  -2 -32  109.89    7.59
  -2   2 -32  114.78    7.37
   2  -2  33   63.45    3.76
  -2  -2 -33   77.97    3.65
   2   2  33   63.64    3.51
   2   2  33   66.42    3.29
  -2  -2 -33   63.45    6.30
   2  -2  33   65.48    3.56
   2   2  33   81.66    9.12
  -2   2 -33   67.48    6.62
  -2  -2 -33   61.66    5.73
   2  -2  33   77.77    9.56
   2   2  33   65.77    3.76
   2   2  33   64.85    4.12
   2  -2  33   64.45    3.35
  -2   2 -33   62.74    5.53
   2  -2  34   71.64    3.58
  -2  -2 -34   66.21    6.50
   2   2  34   80.57    3.66
  -2  -2 -34   72.53    3.55
  -2   2 -34   62.90    5.56
   2   2  34   91.15    9.89
   2  -2  34   69.46    3.92
  -2  -2 -34   57.64    5.65
   2   2  34   71.71    4.02
  -2   2 -34   70.24    6.84
   2  -2  34   86.02   10.13
   2  -2  34   77.86    3.97
   2   2  34   65.42    4.13
   2   2  34   73.20    3.83
   2  -2  35    1.80    0.65
   2   2  35    2.14    0.67
  -2  -2 -35    2.55    0.68
  -2   2 -35    0.74    0.41
  -2  -2 -35    1.74    1.02
   2   2  35    2.66    0.83
   2  -2  35    2.87    0.78
   2   2  35    3.36    0.86
   2  -2  35    2.16    0.67
   2   2  35    2.44    0.76
  -2   2 -35    2.43    1.44
   2   2  35    1.07    1.22
   2  -2  35    2.51    1.69
  -2  -2 -35    2.11    1.34
   2   2  36  169.85    5.38
  -2  -2 -36  171.28   10.74
  -2  -2 -36  155.34    9.52
   2   2  36  168.27    6.11
   2  -2  36  182.14   15.24
   2   2  36  160.33    5.70
   2  -2  36  161.96    5.70
   2  -2  36  167.10    6.32
   2   2  36  169.99    6.71
  -2   2 -36  177.09   11.13
  -2   2 -36  154.34    8.96
   2   2  36  196.48   14.75
  -2  -2 -36  214.96    6.17
   2  -2  37   67.74    9.44
  -2   2 -37   58.66    5.61
   2  -2  37   62.83    3.88
  -2  -2 -37   58.32    6.34
  -2  -2 -37   77.44    3.72
   2   2  37   67.82    8.77
   2   2  37   61.63    3.75
   2  -2  37   63.57    3.61
   2   2  37   59.84    3.51
   2   2  37   61.96    3.28
  -2   2 -37   61.90    6.64
  -2  -2 -37   54.92    5.75
  -2  -2 -38    1.10    0.64
   2   2  38    1.47    0.69
   2   2  38    0.67    0.61
   2  -2  38    0.41    0.58
   2   2  38    0.48    0.45
   2  -2  38    0.82    0.76
   2  -2  39    1.78    0.84
   2   2  39    2.26    0.79
   2  -2  39    1.84    0.74
   2   2  39    2.59    0.81
   2   2  39    2.54    0.67
   2  -2  40   75.93    4.32
   2  -2  40   80.63    4.05
   2   2  40   84.71    3.83
   2   2  40   83.33    4.46
   2   2  40   77.65    4.01
   2   2  41   24.51    2.41
   2   2  41   26.55    2.12
   2  -2  41   23.65    2.45
   2  -2  41   26.39    2.35
   2   2  41   24.65    2.23
   2  -2  42    0.40    0.34
   2  -2  42    0.76    0.58
   2   2  42    0.81    0.50
   2   2  42    0.30    0.34
   2   2  42    0.53    0.50
   2   2  43  129.58    4.55
   2   2  43  123.90    5.30
   2   2  43  118.52    4.68
   2  -2  43  119.18    5.25
   2  -2  43  128.97    4.96
   2  -2  44    6.21    1.09
   2   2  44    5.86    1.17
   2   2  44    4.88    0.89
   2   2  44    5.43    1.08
   2  -2  44    5.87    1.22
   2  -2  45   10.76    1.58
   2   2  45    9.98    1.23
   2   2  45    9.98    1.29
   2  -2  45   10.21    1.37
   2   2  45    9.83    1.46
   2   2  46   12.93    1.34
   2   2  46   13.29    1.63
   2   2  46   10.46    1.27
   2  -2  46   13.52    1.69
   2  -2  46   12.33    1.45
   2  -2  47   93.22    3.75
   2   2  47   88.93    3.51
   2   2  47   96.54    4.25
   2  -2  47   90.47    4.13
   2   2  47   96.86    3.47
   2  -2  48  124.31    4.66
   2   2  48  130.30    3.97
   2   2  48  134.46    4.84
   2   2  48  133.94    3.86
   2  -2  48  130.77    4.26
   2   2  49   48.21    2.79
   2  -2  49   47.90    2.51
   2  -2  49   46.22    2.72
   2  -2  50   10.86    1.29
   2  -2  50    9.77    1.09
   2   2  50   10.86    1.31
   2   2  51   83.79    3.27
   2  -2  51   83.94    3.27
   2  -2  51   82.94    2.87
   2  -2  52   48.94    2.29
   2   2  52   50.34    2.41
   2  -2  52   48.39    2.00
   2   2  53    2.16    0.49
   2  -2  53    2.05    0.48
   2  -2  53    1.64    0.39
   2   2  54    3.08    0.53
  -2  -4  53    3.29    0.47
  -2  -4  53    3.85    0.55
  -2   4  53    4.35    0.66
  -2   4  52    6.55    0.87
  -2  -4  52    6.74    0.85
  -2   4  52    7.29    0.75
  -2  -4  52    6.68    0.75
  -2  -4  51   61.48    2.75
  -2  -4  51   65.85    2.56
  -2   4  51   65.85    2.90
  -2   4  51   63.35    2.49
  -2   4  50    5.56    0.87
  -2  -4  50    6.59    1.00
  -2  -4  50    8.08    1.00
  -2   4  50    7.33    1.08
  -2   4  50    7.32    0.95
  -2   4  49    1.15    0.50
  -2  -4  49    1.67    0.50
  -2  -4  49    1.25    0.46
  -2   4  49    1.38    0.42
  -2   4  49    0.96    0.42
  -2  -4  48    0.78    0.42
  -2   4  48    0.65    0.39
  -2   4  48    1.22    0.47
  -2   4  48    1.32    0.54
  -2  -4  48    0.91    0.39
  -2   4  47   42.62    2.65
  -2  -4  47   40.40    2.80
  -2   4  47   38.02    2.66
   2  -4 -47   47.25    2.48
  -2  -4  47   39.96    2.53
  -2   4  47   41.75    2.78
  -2   4  46   28.01    2.38
  -2   4  46   33.74    2.44
   2  -4 -46   33.73    2.22
  -2  -4  46   34.07    2.44
  -2  -4  46   30.79    2.56
  -2   4  46   33.16    2.60
  -2  -4  45    3.20    0.85
  -2   4  45    0.77    0.53
  -2   4  45    1.98    0.78
  -2   4  45    2.17    0.75
   2  -4 -45    0.61    0.47
  -2  -4  45    2.02    0.91
  -2   4  44    4.58    1.11
  -2   4  44    5.22    1.10
  -2  -4  44    5.82    1.07
   2  -4 -44    4.75    0.90
  -2   4  44    5.14    1.03
  -2  -4  44    4.83    1.12
  -2   4  43   46.94    3.16
  -2  -4  43   47.00    3.41
   2  -4 -43   48.11    2.92
  -2   4  43   46.18    3.28
  -2  -4  43   50.96    3.25
  -2   4  43   43.97    3.29
  -2   4  42   58.35    3.92
  -2  -4  42   58.11    3.88
  -2  -4  42   63.89    3.69
   2  -4 -42   69.26    3.58
  -2   4  42   59.34    2.98
  -2   4  42   62.51    3.91
  -2   4  42   63.79    3.73
  -2   4  41   50.11    3.39
  -2  -4  41   51.50    3.73
  -2   4  41   51.86    3.61
  -2   4  41   43.10    2.63
   2  -4 -41   59.32    3.36
  -2  -4  41   49.28    3.34
  -2   4  41   49.88    3.67
  -2   4  40   97.85    4.05
  -2  -4  40  101.57    5.29
   2  -4 -40  119.94    4.79
  -2   4  40  103.04    5.35
  -2  -4  40  105.81    4.90
  -2   4  40  106.12    4.95
  -2   4  40  106.85    5.17
  -2   4  39  123.26    5.91
   2  -4 -39  132.05    5.07
  -2  -4  39  130.41    5.52
  -2   4  39  125.65    5.63
  -2   4  39  122.17    4.60
  -2  -4  39  127.05    6.00
  -2   4  39  128.51    5.49
  -2   4  38    0.33    0.57
  -2  -4  38    0.58    0.70
  -2   4  38    0.24    0.55
  -2   4  38    0.21    0.42
  -2   4  38   -0.19    0.43
  -2  -4  38    0.08    0.39
   2  -4 -38    0.72    0.49
  -2  -4  37   66.01    3.95
  -2  -4  37   62.78    8.08
  -2  -4  37   69.74    4.50
  -2   4  37   66.58    3.98
   2  -4 -37   64.08    6.77
  -2  -4  37   62.58    8.60
  -2   4  37   66.86    4.19
   2  -4 -37   66.16    6.94
   2   4 -37   66.37    7.03
  -2   4  37   60.27    3.34
  -2   4  37   71.17    4.58
   2  -4 -37   79.51    3.98
  -2   4  37   66.91    7.79
   2   4 -36   60.19    6.66
   2  -4 -36   69.55    3.70
  -2  -4  36   61.55    3.82
  -2   4  36   64.01    4.08
  -2  -4  36   64.53    8.28
  -2   4  36   54.46    3.17
   2  -4 -36   57.67    6.33
  -2   4  36   67.46    7.89
  -2   4  36   66.25    4.38
  -2  -4  36   62.28    4.20
  -2  -4  36   66.70    8.83
  -2   4  36   59.17    3.79
   2  -4 -36   60.37    6.64
   2   4 -35    7.40    2.30
  -2  -4  35    5.69    2.57
  -2   4  35    5.70    1.33
   2  -4 -35    6.55    2.31
  -2   4  35    8.19    2.77
  -2  -4  35    7.77    2.93
  -2  -4  35    7.73    1.57
  -2   4  35    8.35    1.56
   2  -4 -35    6.07    2.12
  -2  -4  35    8.13    1.53
  -2   4  35    6.72    1.31
  -2   4  35    5.44    1.04
   2  -4 -35    8.03    1.29
  -2  -4  34   92.83    4.72
   2  -4 -34   81.08    7.50
   2  -4 -34   83.11    7.61
  -2  -4  34  102.28   10.21
  -2  -4  34   86.52    4.94
  -2   4  34   91.26    4.63
   2   4 -34   82.20    7.59
  -2   4  34   91.42    5.13
  -2  -4  34  101.19   10.76
  -2   4  34   84.21    3.96
  -2   4  34   86.35    4.60
   2  -4 -34   95.86    4.25
  -2   4  33   26.16    2.20
  -2  -4  33   24.76    2.47
  -2  -4  33   33.71    6.20
  -2   4  33   23.63    2.41
   2  -4 -33   17.98    3.52
  -2   4  33   25.48    2.45
  -2   4  33   22.12    2.52
  -2  -4  33   24.48    2.65
   2  -4 -33   17.80    3.45
  -2  -4  33   29.94    5.46
   2  -4 -33   20.69    2.01
   2   4 -33   18.28    3.58
  -2   4  32   25.27    2.68
   2   4 -32   22.56    3.88
  -2   4  32   26.80    2.22
  -2  -4  32   31.99    5.62
   2  -4 -32   19.57    3.63
  -2  -4  32   28.17    2.60
  -2  -4  32   32.87    6.03
  -2  -4  32   26.28    2.74
  -2   4  32   24.72    2.43
  -2   4  32   25.93    2.48
   2  -4 -32   26.05    2.22
   2  -4 -32   22.88    3.92
  -2   4  31  603.29   10.44
  -2   4  31  629.07   11.89
  -2  -4  31  639.81   13.03
  -2   4  31  641.50   11.89
   2  -4 -31  613.26   19.91
  -2  -4  31  684.60   25.52
  -2  -4  31  737.36   27.83
  -2   4  31  665.33   13.43
  -2  -4  31  628.37   12.02
   2  -4 -31  687.66   11.10
   2   4 -31  622.85   19.71
   2  -4 -31  594.85   19.52
   2  -4 -30    4.92    1.92
  -2  -4  30    8.49    3.02
  -2  -4  30    6.02    2.44
   2   4 -30    3.82    1.87
   2  -4 -30    4.03    1.78
   2  -4 -29  119.91    8.59
   2   4 -29  118.72    8.34
   2  -4 -29  120.43    8.56
   2   4 -29  116.45    6.39
  -2  -4  29   95.46    9.31
  -2  -4  29  104.77   10.21
   2  -4 -28    1.47    1.11
  -2  -4  28    2.54    1.84
   2   4 -28    2.66    1.28
  -2  -4  28    2.66    1.78
   2  -4 -28    0.79    0.89
   2   4 -28    2.11    0.81
  -2  -4  27  143.31   11.07
  -2  -4  27  161.45   12.13
   2   4 -27  173.31    7.46
   2   4 -27  178.81    9.85
   2  -4 -27  175.47   10.08
   2  -4 -27  166.70    9.68
   2  -4 -26   33.74    4.27
  -2  -4  26   30.15    4.89
   2   4 -26   35.43    4.33
  -2  -4  26   35.94    4.36
   2   4 -26   36.42    3.34
  -2  -4  26   41.02    6.06
   2  -4 -26   37.17    4.64
  -2  -4  25   23.77    4.45
   2  -4 -25   32.06    4.29
  -2  -4  25   26.12    4.75
  -2  -4  25   23.85    3.58
   2   4 -25   30.73    2.98
  -2   4  25   22.81    2.93
   2  -4 -25   32.04    4.10
   2   4 -25   32.30    4.01
   2  -4 -24   98.13    7.03
  -2  -4  24  111.67    9.20
  -2  -4  24  123.82    9.92
   2   4 -24  102.59    6.99
  -2  -4  24  121.67    7.83
   2  -4 -24  104.23    7.58
  -2   4  24  103.59    6.22
   2   4 -24  103.07    5.36
  -2  -4  23    1.27    0.68
  -2  -4  23    2.55    1.64
   2  -4 -23    1.80    0.98
  -2   4  23    1.84    1.04
   2   4 -23    1.18    0.71
   2  -4 -23    1.51    1.01
  -2  -4  23    1.34    1.21
   2   4 -23    0.65    0.43
  -2  -4  22   90.71    8.02
   2   4 -22   73.85    4.34
  -2  -4  22   81.34    7.53
  -2  -4  22   86.15    6.43
   2   4 -22   73.67    5.67
   2  -4 -22   76.31    6.37
   2  -4 -22   63.68    5.59
  -2   4  22   78.12    5.36
  -2  -4  21  678.42   21.21
  -2   4  21  686.70   15.68
   2  -4 -21  780.78   18.99
   2  -4 -21  862.27   20.96
  -2  -4  21  789.49   22.85
   2   4 -21  860.04   14.33
   2   4 -21  840.56   18.80
  -2  -4  21  740.12   18.47
   2   4 -20  575.09   11.47
   2  -4 -20  532.28   15.49
  -2  -4  20  527.72   18.23
  -2   4  20  529.85   13.62
   2  -4 -20  584.80   16.98
  -2  -4  20  603.24   19.28
  -2  -4  20  575.46   16.01
   2   4 -20  572.40   15.13
  -2  -4  19  958.53   24.04
  -2  -4  19 1113.81   25.14
  -2  -4  19 1035.98   21.22
   2   4 -19 1148.02   21.07
   2  -4 -19 1184.81   23.92
   2  -4 -19 1074.56   21.65
   2   4 -19 1174.57   15.87
  -2   4  19  978.21   18.40
  -2  -4  18   55.49    5.74
   2   4 -18   56.19    3.39
   2   4 -18   50.45    4.34
   2  -4 -18   48.88    4.49
  -2  -4  18   64.02    5.83
  -2  -4  18   59.14    5.02
  -2   4  18   56.65    4.35
   2  -4 -18   50.90    4.92
   2  -4 -17  457.02   14.31
  -2   4  17  395.80   11.34
   2  -4 -17  420.83   12.82
   2   4 -17  444.67    9.21
  -2  -4  17  417.19   13.01
   2   4 -17  440.16   12.35
  -2  -4  17  407.47   14.92
  -2  -4  17  439.42   14.54
  -2  -4  16   31.48    4.14
  -2  -4  16   30.54    3.50
   2   4 -16   31.54    2.38
  -2  -4  16   31.30    2.92
   2  -4 -16   32.38    3.76
   2  -4 -16   31.30    3.43
  -2  -4  16   36.42    4.07
  -2   4  16   30.95    3.14
   2   4 -16   30.77    3.19
   2   4 -15  103.41    4.16
  -2   4  15  120.47    6.04
  -2  -4  15  124.49    6.85
  -2  -4  15  135.72    5.70
   2  -4 -15  104.08    6.46
   2  -4 -15   90.27    5.61
   2   4 -15   95.18    5.41
  -2  -4  15  129.68    8.08
  -2  -4  15  137.73    7.51
  -2  -4  14  117.04    6.48
  -2   4  14  112.77    5.72
   2  -4 -14   99.35    6.29
   2  -4 -14   96.88    5.67
  -2  -4  14  124.06    5.24
   2   4 -14  103.66    4.00
  -2  -4  14  118.83    7.46
   2   4 -14   93.35    5.13
  -2  -4  14  130.73    7.03
  -2  -4  13  190.16    6.21
  -2  -4  13  181.10    8.89
  -2  -4  13  206.37    8.43
   2  -4 -13  278.00   10.16
   2   4 -13  286.33    8.63
   2   4 -13  261.22    6.03
  -2  -4  13  178.96    7.83
  -2   4  13  179.68    7.09
   2  -4 -13  265.80    9.01
  -2  -4  12    2.18    0.85
   2   4 -12    2.92    0.64
   2  -4 -12    4.15    1.12
  -2  -4  12    2.23    0.71
  -2  -4  12    3.12    1.35
  -2   4  12    2.16    0.78
   2  -4 -12    3.88    1.17
  -2  -4  12    0.99    0.74
   2   4 -12    3.53    0.90
   2   4 -11 2107.21   21.54
  -2  -4  11 1833.82   23.78
   2  -4 -11 2145.77   26.75
  -2  -4  11 2034.61   23.90
   2  -4 -11 2002.84   22.93
  -2   4  11 1858.09   21.92
   2   4 -11 1979.44   15.10
  -2  -4  11 1899.08   26.89
  -2  -4  11 1922.11   17.89
  -2  -4  10    5.76    0.99
   2   4 -10    2.57    0.80
  -2   4  10    3.46    1.01
   2  -4 -10    2.00    0.99
  -2  -4  10    4.34    1.51
   2   4 -10    1.58    0.45
   2  -4 -10    2.08    0.77
  -2  -4  10    3.81    1.05
  -2  -4  10    3.29    1.06
   2   4  -9  144.98    3.53
   2  -4  -9  163.95    7.08
   2  -4  -9  152.46    5.85
  -2  -4   9  111.41    4.00
  -2  -4   9  104.62    5.43
  -2   4   9  111.26    5.22
   2   4  -9  164.73    5.51
  -2  -4   9  120.14    5.30
  -2  -4   9  107.51    5.92
  -2   4   8   70.54    4.08
   2   4  -8   84.95    3.76
  -2  -4   8   73.59    3.19
   2   4  -8   65.70    1.69
  -2  -4   8   71.10    4.54
   2   4  -8   80.25    5.15
  -2  -4   8   74.07    4.03
   2  -4  -8   81.86    4.06
   2  -4  -8   83.11    4.90
   2   4  -8   75.58    2.32
  -2   4   7 3481.00   28.17
   2  -4  -7 3583.37   25.86
  -2  -4   7 3608.68   27.03
   2   4  -7 3778.75   23.50
   2  -4  -7 3738.12   31.27
   2   4  -7 3616.58   14.38
  -2  -4   7 3419.42   21.02
  -2   4   7 3820.72   21.78
  -2  -4   7 3635.74   30.80
   2   4  -6  459.20    7.78
   2  -4  -6  459.60   10.83
   2  -4  -6  446.49    8.57
  -2   4   6  468.42    7.06
   2  -4  -5  207.77    5.59
  -2  -4   5  166.06    5.89
   2  -4  -5  157.35    5.44
   2  -4  -5  199.21    6.99
  -2   4   5  216.81    4.43
  -2  -4   5  161.96    5.35
   2   4  -5  212.42    5.07
  -2  -4   5  158.15    4.35
   2  -4  -4   58.45    2.28
   2  -4  -4   44.83    2.46
  -2  -4   4   52.25    2.33
   2   4  -4   45.69    2.22
  -2   4   4   47.17    1.94
   2  -4  -4   45.00    3.26
  -2  -4   4   53.06    2.49
   2  -4  -4   51.40    3.07
  -2  -4   4   58.76    3.29
  -2  -4   4   55.20    3.07
  -2  -4   3 4367.00   22.34
  -2  -4   3 4631.28   27.76
  -2  -4   3 4626.32   27.16
   2   4  -3 4855.38   21.76
  -2   4   3 4825.57   18.91
  -2  -4   3 4918.10   24.57
   2  -4  -3 4710.26   23.87
   2  -4  -3 4711.05   21.54
   2   4  -2   57.86    3.71
   2   4  -2   56.72    2.26
   2  -4  -2   59.98    2.59
  -2  -4   2   63.47    3.01
  -2  -4   2   54.00    2.53
  -2  -4   2   61.02    2.98
   2  -4  -2   56.83    3.07
  -2   4   2   57.57    2.07
   2  -4  -2   52.98    3.24
   2  -4  -2   57.15    2.49
  -2   4   1  183.30    6.08
  -2  -4   1  250.69    3.62
  -2  -4   1  202.39    5.02
  -2  -4   1  277.81    6.65
   2  -4  -1  175.62    5.28
   2   4  -1  295.78    8.24
   2  -4  -1  211.55    6.29
   2  -4  -1  200.65    5.03
  -2   4   0  419.87    6.28
  -2  -4   0  402.00    6.60
   2  -4   0  350.10    7.42
  -2  -4   0  389.98    5.18
  -2  -4   0  433.25    8.72
   2  -4   0  386.16    8.57
   2  -4   0  405.31    8.66
   2  -4   0  387.65    7.37
  -2   4   0  374.68    8.53
   2   4   0  413.85    9.60
   2  -4   1 2279.20   18.99
  -2  -4  -1 2611.44   22.31
   2   4   1 2676.79   24.41
   2  -4   1 2337.26   20.95
  -2  -4  -1 2307.60   14.71
   2  -4   1 2273.24   20.59
  -2  -4  -2   78.44    2.57
   2  -4   2   71.68    3.68
  -2  -4  -2   73.67    3.93
   2  -4   2   73.71    3.62
  -2  -4  -2   68.17    2.72
   2   4   2   69.60    3.95
   2  -4   2   70.21    3.22
  -2  -4  -3  144.90    5.73
   2  -4   3   90.08    4.20
  -2  -4  -3  100.95    2.74
  -2  -4  -3  139.12    4.24
   2  -4   3   83.65    3.50
   2  -4   3   92.82    4.23
   2   4   3  170.39    6.22
   2  -4   4  831.80   12.93
   2  -4   4  801.89   10.75
   2  -4   4  834.54   13.25
  -2  -4  -4  814.45   11.06
  -2  -4  -4  808.27   13.80
   2   4   4  781.27   13.46
   2  -4   5   25.92    1.94
   2  -4   5   32.15    2.66
   2  -4   5   27.93    2.63
   2   4   5   52.55    3.60
  -2  -4  -5   46.29    2.82
  -2  -4  -5   49.03    3.53
  -2  -4  -6  768.84   14.18
  -2  -4  -6  794.19   12.24
   2   4   6  760.07   13.66
   2  -4   6  754.76   13.72
   2  -4   6  746.65   10.11
   2  -4   6  785.62   13.30
   2  -4   7  465.85   11.11
  -2  -4  -7  547.19   10.75
   2  -4   7  485.06   10.82
  -2  -4  -7  525.45   12.02
   2   4   7  542.00   11.68
   2  -4   7  445.41    7.74
   2  -4   7  495.81   11.02
  -2  -4  -8  145.46    5.82
   2  -4   8  191.03    7.07
   2  -4   8  177.25    4.82
   2  -4   8  183.79    7.28
   2  -4   8  193.42    6.14
  -2  -4  -8  131.11    6.07
   2   4   8  116.21    5.57
   2  -4   8  197.72    7.24
   2  -4   9  249.18    8.39
   2  -4   9  217.79    5.30
  -2  -4  -9  260.51    8.55
   2  -4   9  248.24    8.37
   2   4   9  266.41    8.59
   2  -4   9  230.63    8.37
   2  -4   9  238.92    6.98
  -2  -4  -9  270.16    8.28
  -2  -4 -10   85.54    4.83
   2  -4  10   85.02    3.27
   2  -4  10   88.95    5.30
   2  -4  10   92.88    5.37
   2  -4  10   89.35    4.37
   2  -4  10   94.16    5.29
   2   4  10   76.06    4.76
  -2  -4 -10   86.66    5.01
   2   4  11 2522.93   27.80
   2  -4  11 2463.35   28.52
   2  -4  11 2541.15   23.98
   2  -4  11 2539.49   28.56
  -2  -4 -11 2549.95   27.31
  -2   4 -11 2510.90   19.81
   2  -4  11 2584.50   29.71
  -2  -4 -11 2633.81   27.67
   2  -4  12  220.03    7.30
   2  -4  12  220.26    9.02
  -2  -4 -12  209.18    8.05
   2  -4  12  198.88    4.95
   2  -4  12  216.33    8.61
   2  -4  12  221.53    8.71
   2   4  12  193.62    7.94
  -2  -4 -12  212.70    7.96
  -2   4 -12  197.91    5.51
   2  -4  13  807.57   17.32
  -2  -4 -13  827.24   15.75
  -2  -4 -13  843.13   16.57
   2  -4  13  841.36   14.82
   2   4  13  800.69   16.65
  -2   4 -13  837.65   11.41
   2  -4  13  847.93   17.45
   2  -4  13  747.07    9.56
   2   4  13  769.16   11.66
   2  -4  13  851.05   18.51
  -2  -4 -14  441.16   11.74
   2  -4  14  459.47    7.43
   2  -4  14  528.54   14.06
   2   4  14  401.22   12.20
   2   4  14  478.11    9.33
   2  -4  14  512.04   11.98
  -2  -4 -14  448.60   12.33
  -2   4 -14  436.27    8.28
   2  -4  14  518.81   15.16
   2  -4  14  498.89   13.99
   2  -4  15   29.01    3.35
  -2   4 -15   20.13    2.22
  -2  -4 -15   21.45    2.64
   2  -4  15   30.00    3.83
  -2   4 -15   20.99    1.83
   2  -4  15   27.64    3.44
  -2  -4 -15   21.49    2.75
   2  -4  15   26.98    2.89
   2   4  15   26.82    2.22
   2   4  15   19.54    2.79
   2  -4  15   23.80    1.68
   2   4  16    4.88    1.00
  -2  -4 -16   11.08    1.93
  -2   4 -16   10.13    1.26
   2  -4  16    4.87    1.28
   2  -4  16    4.14    1.31
  -2  -4 -16    9.44    1.80
  -2  -4 -16    8.05    1.86
   2  -4  16    4.47    1.58
   2  -4  16    3.13    0.62
   2   4  16   10.27    2.12
  -2   4 -16    8.65    1.51
   2  -4  16    5.66    1.81
  -2  -4 -17  478.79   12.49
  -2   4 -17  451.79   10.90
   2  -4  17  417.46   12.00
  -2   4 -17  469.29    8.65
   2  -4  17  419.46   13.25
   2   4  17  375.62    8.48
  -2  -4 -17  469.82   13.20
  -2  -4 -17  432.24   12.16
   2  -4  17  404.42   15.20
   2  -4  17  381.61   13.59
   2  -4  18    8.30    2.19
   2   4  18    6.45    1.17
  -2  -4 -18    2.50    1.08
  -2   4 -18    2.86    0.75
   2  -4  18    9.13    1.90
   2  -4  18    9.00    1.95
  -2  -4 -18    1.88    0.95
   2  -4  18    7.36    2.35
  -2  -4 -18    2.39    0.72
  -2   4 -18    2.02    0.81
  -2   4 -18    2.86    0.93
   2  -4  19  851.15   19.40
   2   4  19  806.52   13.26
   2   4  19  757.79   12.40
  -2  -4 -19  711.64   15.58
   2  -4  19  785.45   22.69
  -2   4 -19  726.67   14.73
  -2  -4 -19  709.88   16.68
  -2   4 -19  752.55   11.23
  -2   4 -19  745.90   17.05
   2  -4  19  783.10   20.76
  -2  -4 -19  695.71   16.14
  -2   4 -20  163.22    7.18
  -2   4 -20  174.53    5.49
   2  -4  20  142.08   10.16
   2   4  20  148.23    5.80
   2  -4  20  151.36    8.34
  -2   4 -20  174.14    8.43
  -2  -4 -20  163.60    7.51
  -2  -4 -20  163.11    8.14
  -2  -4 -20  157.59    7.87
   2  -4  20  147.08    9.27
   2  -4  21 1485.49   26.52
  -2  -4 -21 1378.68   22.29
  -2   4 -21 1407.87   21.74
  -2  -4 -21 1350.35   23.49
   2  -4  21 1388.59   32.71
   2   4  21 1500.36   18.73
  -2   4 -21 1501.52   25.33
  -2  -4 -21 1402.89   24.02
   2  -4  21 1365.27   28.85
  -2  -4 -22   12.00    2.31
  -2   4 -22   10.91    1.98
   2  -4  22    8.93    2.11
   2  -4  22   11.11    3.31
  -2  -4 -22   12.70    2.38
  -2  -4 -22   11.17    2.08
   2   4  22    9.64    1.51
   2  -4  22    8.66    2.31
  -2   4 -22   11.21    2.24
   2  -4  23   29.97    3.83
   2  -4  23   27.91    4.91
  -2  -4 -23   15.41    2.67
   2  -4  23   27.75    4.22
  -2  -4 -23   16.02    2.43
  -2  -4 -23   18.07    2.89
  -2   4 -23   20.20    3.15
  -2   4 -23   21.45    2.78
  -2   4 -24   37.97    3.79
   2  -4  24   31.74    4.72
   2  -4  24   34.82    4.24
  -2  -4 -24   39.18    4.26
   2  -4  24   32.04    5.39
  -2   4 -24   43.60    4.65
  -2  -4 -24   37.28    3.78
  -2  -4 -24   37.93    4.17
   2  -4  25   82.87    8.92
  -2   4 -25   82.34    6.53
   2  -4  25   89.43    6.87
  -2   4 -25   73.80    5.37
   2  -4  25   89.73    8.18
  -2  -4 -25   75.49    6.00
  -2  -4 -25   71.08    5.74
  -2  -4 -25   69.93    5.23
   2  -4  26   16.94    3.73
  -2  -4 -26   15.87    2.78
  -2   4 -26   17.46    3.02
   2  -4  26   19.44    4.41
  -2  -4 -26   16.40    2.84
   2  -4  26   19.72    3.37
  -2   4 -26   18.16    2.77
  -2  -4 -26   16.99    2.66
  -2  -4 -27  523.18   14.54
   2  -4  27  537.09   20.96
   2  -4  27  579.17   18.00
  -2  -4 -27  548.72   16.74
  -2  -4 -27  562.58   16.84
  -2   4 -27  564.99   15.25
   2  -4  27  554.66   24.32
  -2  -4 -28   71.33    6.09
  -2  -4 -28   66.80    5.26
  -2   4 -28   91.82    7.13
  -2  -4 -28   77.76    6.44
   2  -4  28   79.57    9.41
   2  -4  28   80.44    6.80
   2  -4  28   74.63    7.99
  -2   4 -28   78.00    5.79
  -2  -4 -29  457.07   15.70
   2  -4  29  469.52   16.56
  -2   4 -29  466.47   14.27
  -2  -4 -29  425.33   13.34
  -2  -4 -29  478.55   16.01
  -2   4 -29  510.35   17.04
   2  -4  29  427.57   19.27
   2  -4  29  448.74   22.60
  -2  -4 -30    1.24    1.11
   2  -4  30    0.90    1.26
   2   4  30    1.29    0.61
   2  -4  30    1.65    1.17
  -2   4 -30    2.34    1.10
  -2  -4 -30    2.57    1.13
   2  -4  30    2.10    1.11
  -2  -4 -30    0.95    0.70
   2  -4  30    0.89    0.63
  -2   4 -30    1.44    0.91
   2  -4  30    1.34    0.55
  -2  -4 -31  363.67   14.46
   2   4  31  378.62    8.76
  -2  -4 -31  342.24   14.04
   2  -4  31  400.14   15.70
   2  -4  31  365.01    7.72
   2  -4  31  379.72   21.64
   2   4  31  374.52    9.55
  -2  -4 -31  404.27    8.39
   2  -4  31  358.84   18.32
   2  -4  31  353.97    8.85
  -2  -4 -31  325.50   11.86
   2  -4  31  364.86    8.69
  -2   4 -31  398.10   15.71
  -2   4 -31  365.25   12.98
   2  -4  32    9.31    1.50
   2  -4  32    8.49    1.23
   2  -4  32    7.46    1.36
  -2  -4 -32    8.52    2.23
  -2  -4 -32   13.13    1.57
   2   4  32   10.62    1.64
  -2   4 -32    9.35    2.24
  -2  -4 -32    9.24    2.33
   2   4  32    8.91    1.42
   2  -4  32    5.24    2.65
  -2   4 -32   11.59    2.71
   2  -4  32    6.63    2.53
   2  -4  32    8.89    2.40
   2   4  33   10.28    1.52
  -2   4 -33    8.14    2.10
  -2  -4 -33    9.07    1.33
   2   4  33    8.35    1.46
  -2   4 -33    8.36    2.33
   2  -4  33   11.20    3.73
   2  -4  33   10.54    1.43
   2  -4  33   10.60    3.28
   2  -4  33   10.25    1.56
   2  -4  33    9.96    1.66
  -2  -4 -33    6.93    1.99
   2  -4  33   13.11    2.79
  -2  -4 -33    6.28    1.92
   2   4  34   47.56    3.50
   2   4  34   42.57    6.72
  -2  -4 -34   56.66    3.26
  -2  -4 -34   47.91    5.46
   2  -4  34   44.63    7.70
  -2  -4 -34   41.50    5.10
  -2   4 -34   52.97    6.12
   2  -4  34   44.22    2.80
   2  -4  34   41.66    3.05
   2  -4  34   43.58    3.24
  -2   4 -34   46.74    4.79
   2   4  34   45.30    3.15
   2   4  34   44.41    3.05
   2  -4  34   39.17    6.13
   2   4  35  107.17    4.88
  -2  -4 -35  116.97    4.65
   2  -4  35   99.76    4.70
   2   4  35  100.07    5.13
   2  -4  35  102.60    5.03
   2   4  35  106.16    4.67
  -2  -4 -35  103.59    8.16
   2  -4  35  102.70    4.30
   2  -4  35  111.12   12.25
  -2   4 -35  105.35    8.63
  -2  -4 -35   93.47    7.65
  -2   4 -35   99.49    7.04
   2   4  35  116.08   10.95
   2  -4  36  129.32    4.83
   2  -4  36  136.89    5.82
  -2  -4 -36  149.27    5.29
   2   4  36  136.86    5.51
   2  -4  36  139.43    5.55
   2  -4  36  135.03   13.65
   2   4  36  154.82   12.81
  -2   4 -36  128.89    8.09
  -2  -4 -36  130.96    9.28
  -2   4 -36  138.77    9.98
   2   4  36  136.10    5.41
[truncated: 2,523,345 more chars]
